# Supplementary material for: Design, Synthesis, and Evaluation of Novel 3-Carboranyl-1,8-Naphthalimide Derivatives as Potential Anticancer Agents
Source: PubMed Central journal article supplement (PMC7967199; doi:10.3390/ijms22052772), 2021-03-09
Supplement: ijms-22-02772-s001.pdf [file ijms-22-02772-s001.pdf]

# Design, synthesis, and evaluation of novel 3-carboranyl-1,8-naphthalimide derivatives as potential anticancer agents.

Sebastian Rykowski<sup>a</sup>, Dorota Gurda-Woźna<sup>b,1</sup>, Marta Orlicka-Płocka<sup>b,1</sup>, Agnieszka Fedoruk-Wyszomirska<sup>b</sup>, Małgorzata Giel-Pietraszuk<sup>b</sup>, Eliza Wyszko<sup>b</sup>, Aleksandra Kowalczyk<sup>c</sup>, Paweł Stączek<sup>c</sup>, Andrzej Bak<sup>d</sup>, Agnieszka Kiliszek<sup>b</sup>, Wojciech Rypniewski<sup>b</sup>, Agnieszka B. Olejniczak<sup>a,\*</sup>

<sup>a</sup>Institute of Medical Biology, Polish Academy of Sciences, 106 Lodowa St.,  
Łódź 93-232, Poland

<sup>b</sup>Institute of Bioorganic Chemistry, Polish Academy of Sciences, 12/14 Z.  
Noskowskiego St., 61-704 Poznan, Poland

<sup>c</sup>Department of Molecular Microbiology, Faculty of Biology and Environmental  
Protection, University of Lodz, 12/16 Banacha St., Łódź 90-237, Poland

<sup>d</sup>Department of Chemistry, University of Silesia, Szkolna 9 St., 40-007 Katowice,  
Poland

## Table of contents

|                                                                                   |    |
|-----------------------------------------------------------------------------------|----|
| <b>Figure S1.</b> <sup>1</sup> H NMR spectrum of <b>6</b>                         | 7  |
| <b>Figure S2.</b> <sup>13</sup> C NMR spectrum of <b>6</b>                        | 8  |
| <b>Figure S3.</b> <sup>11</sup> B NMR { <sup>1</sup> H BB} spectrum of <b>6</b>   | 9  |
| <b>Figure S4.</b> UV spectrum of <b>6</b>                                         | 10 |
| <b>Figure S5.</b> IR spectrum of <b>6</b>                                         | 11 |
| <b>Figure S6.</b> HPLC analysis of <b>6</b>                                       | 12 |
| <b>Figure S7.</b> MS spectrum of <b>6</b>                                         | 13 |
| <b>Figure S8.</b> <sup>1</sup> H NMR spectrum of <b>7</b>                         | 14 |
| <b>Figure S9.</b> <sup>13</sup> C NMR spectrum of <b>7</b>                        | 15 |
| <b>Figure S10.</b> <sup>11</sup> B NMR { <sup>1</sup> H BB} spectrum of <b>7</b>  | 16 |
| <b>Figure S11.</b> UV spectrum of <b>7</b>                                        | 17 |
| <b>Figure S12.</b> IR spectrum of <b>7</b>                                        | 18 |
| <b>Figure S13.</b> HPLC analysis of <b>7</b>                                      | 19 |
| <b>Figure S14.</b> MS spectrum of <b>7</b>                                        | 20 |
| <b>Figure S15.</b> <sup>1</sup> H NMR spectrum of <b>8</b>                        | 21 |
| <b>Figure S16.</b> <sup>13</sup> C NMR spectrum of <b>8</b>                       | 22 |
| <b>Figure S17.</b> <sup>11</sup> B NMR { <sup>1</sup> H BB} spectrum of <b>8</b>  | 23 |
| <b>Figure S18.</b> UV spectrum of <b>8</b>                                        | 24 |
| <b>Figure S19.</b> IR spectrum of <b>8</b>                                        | 25 |
| <b>Figure S20.</b> HPLC analysis of <b>8</b>                                      | 26 |
| <b>Figure S21.</b> MS spectrum of <b>8</b>                                        | 27 |
| <b>Figure S22.</b> HRMS spectrum of <b>8</b>                                      | 28 |
| <b>Figure S23.</b> <sup>1</sup> H NMR spectrum of <b>9</b>                        | 29 |
| <b>Figure S24.</b> <sup>13</sup> C NMR spectrum of <b>9</b>                       | 30 |
| <b>Figure S25.</b> <sup>11</sup> B NMR { <sup>1</sup> H BB} spectrum of <b>9</b>  | 31 |
| <b>Figure S26.</b> UV spectrum of <b>9</b>                                        | 32 |
| <b>Figure S27.</b> IR spectrum of <b>9</b>                                        | 33 |
| <b>Figure S28.</b> HPLC analysis of <b>9</b>                                      | 34 |
| <b>Figure S29.</b> MS spectrum of <b>9</b>                                        | 35 |
| <b>Figure S30.</b> <sup>1</sup> H NMR spectrum of <b>10</b>                       | 36 |
| <b>Figure S31.</b> <sup>13</sup> C NMR spectrum of <b>10</b>                      | 37 |
| <b>Figure S32.</b> <sup>11</sup> B NMR { <sup>1</sup> H BB} spectrum of <b>10</b> | 38 |
| <b>Figure S33.</b> UV spectrum of <b>10</b>                                       | 39 |
| <b>Figure S34.</b> IR spectrum of <b>10</b>                                       | 40 |
| <b>Figure S35.</b> HPLC analysis of <b>10</b>                                     | 41 |
| <b>Figure S36.</b> MS spectrum of <b>10</b>                                       | 42 |
| <b>Figure S37.</b> <sup>1</sup> H NMR spectrum of <b>11</b>                       | 43 |
| <b>Figure S38.</b> <sup>13</sup> C NMR spectrum of <b>11</b>                      | 44 |
| <b>Figure S39.</b> <sup>11</sup> B NMR { <sup>1</sup> H BB} spectrum of <b>11</b> | 45 |
| <b>Figure S40.</b> UV spectrum of <b>11</b>                                       | 46 |
| <b>Figure S41.</b> IR spectrum of <b>11</b>                                       | 47 |
| <b>Figure S42.</b> HPLC analysis of <b>11</b>                                     | 48 |
| <b>Figure S43.</b> MS spectrum of <b>11</b>                                       | 49 |
| <b>Figure S44.</b> <sup>1</sup> H NMR spectrum of <b>15</b>                       | 50 |
| <b>Figure S45.</b> <sup>13</sup> C NMR spectrum of <b>15</b>                      | 51 |
| <b>Figure S46.</b> <sup>11</sup> B NMR { <sup>1</sup> H BB} spectrum of <b>15</b> | 52 |
| <b>Figure S47.</b> UV spectrum of <b>15</b>                                       | 53 |
| <b>Figure S48.</b> IR spectrum of <b>15</b>                                       | 54 |
| <b>Figure S49.</b> HPLC analysis of <b>15</b>                                     | 55 |
| <b>Figure S50.</b> MS spectrum of <b>15</b>                                       | 56 |

|                                                                                   |     |
|-----------------------------------------------------------------------------------|-----|
| <b>Figure S51.</b> <sup>1</sup> H NMR spectrum of <b>16</b>                       | 57  |
| <b>Figure S52.</b> <sup>13</sup> C NMR spectrum of <b>16</b>                      | 58  |
| <b>Figure S53.</b> <sup>11</sup> B NMR { <sup>1</sup> H BB} spectrum of <b>16</b> | 59  |
| <b>Figure S54.</b> UV spectrum of <b>16</b>                                       | 60  |
| <b>Figure S55.</b> IR spectrum of <b>16</b>                                       | 61  |
| <b>Figure S56.</b> HPLC analysis of <b>16</b>                                     | 62  |
| <b>Figure S57.</b> MS spectrum of <b>16</b>                                       | 63  |
| <b>Figure S58.</b> <sup>1</sup> H NMR spectrum of <b>17</b>                       | 64  |
| <b>Figure S59.</b> <sup>13</sup> C NMR spectrum of <b>17</b>                      | 65  |
| <b>Figure S60.</b> <sup>11</sup> B NMR { <sup>1</sup> H BB} spectrum of <b>17</b> | 66  |
| <b>Figure S61.</b> UV spectrum of <b>17</b>                                       | 67  |
| <b>Figure S62.</b> IR spectrum of <b>17</b>                                       | 68  |
| <b>Figure S63.</b> HPLC analysis of <b>17</b>                                     | 69  |
| <b>Figure S64.</b> MS spectrum of <b>17</b>                                       | 70  |
| <b>Figure S65.</b> <sup>1</sup> H NMR spectrum of <b>18</b>                       | 71  |
| <b>Figure S66.</b> <sup>13</sup> C NMR spectrum of <b>18</b>                      | 72  |
| <b>Figure S67.</b> <sup>11</sup> B NMR { <sup>1</sup> H BB} spectrum of <b>18</b> | 73  |
| <b>Figure S68.</b> UV spectrum of <b>18</b>                                       | 74  |
| <b>Figure S69.</b> IR spectrum of <b>18</b>                                       | 75  |
| <b>Figure S70.</b> HPLC analysis of <b>18</b>                                     | 76  |
| <b>Figure S71.</b> MS spectrum of <b>18</b>                                       | 77  |
| <b>Figure S72.</b> <sup>1</sup> H NMR spectrum of <b>19</b>                       | 78  |
| <b>Figure S73.</b> <sup>13</sup> C NMR spectrum of <b>19</b>                      | 79  |
| <b>Figure S74.</b> <sup>11</sup> B NMR { <sup>1</sup> H BB} spectrum of <b>19</b> | 80  |
| <b>Figure S75.</b> UV spectrum of <b>19</b>                                       | 81  |
| <b>Figure S76.</b> IR spectrum of <b>19</b>                                       | 82  |
| <b>Figure S77.</b> HPLC analysis of <b>19</b>                                     | 83  |
| <b>Figure S78.</b> MS spectrum of <b>19</b>                                       | 84  |
| <b>Figure S79.</b> <sup>1</sup> H NMR spectrum of <b>20</b>                       | 85  |
| <b>Figure S80.</b> <sup>13</sup> C NMR spectrum of <b>20</b>                      | 86  |
| <b>Figure S81.</b> <sup>11</sup> B NMR { <sup>1</sup> H BB} spectrum of <b>20</b> | 87  |
| <b>Figure S82.</b> UV spectrum of <b>20</b>                                       | 88  |
| <b>Figure S83.</b> IR spectrum of <b>20</b>                                       | 89  |
| <b>Figure S84.</b> HPLC analysis of <b>20</b>                                     | 90  |
| <b>Figure S85.</b> MS spectrum of <b>20</b>                                       | 91  |
| <b>Figure S86.</b> HRMS spectrum of <b>20</b>                                     | 92  |
| <b>Figure S87.</b> <sup>1</sup> H NMR spectrum of <b>31</b>                       | 93  |
| <b>Figure S88.</b> <sup>13</sup> C NMR spectrum of <b>31</b>                      | 94  |
| <b>Figure S89.</b> <sup>11</sup> B NMR { <sup>1</sup> H BB} spectrum of <b>31</b> | 95  |
| <b>Figure S90.</b> UV spectrum of <b>31</b>                                       | 96  |
| <b>Figure S91.</b> IR spectrum of <b>31</b>                                       | 97  |
| <b>Figure S92.</b> HPLC analysis of <b>31</b>                                     | 98  |
| <b>Figure S93.</b> MS spectrum of <b>31</b>                                       | 99  |
| <b>Figure S94.</b> <sup>1</sup> H NMR spectrum of <b>32</b>                       | 100 |
| <b>Figure S95.</b> <sup>13</sup> C NMR spectrum of <b>32</b>                      | 101 |
| <b>Figure S96.</b> <sup>11</sup> B NMR { <sup>1</sup> H BB} spectrum of <b>32</b> | 102 |
| <b>Figure S97.</b> UV spectrum of <b>32</b>                                       | 103 |
| <b>Figure S98.</b> IR spectrum of <b>32</b>                                       | 104 |
| <b>Figure S99.</b> HPLC analysis of <b>32</b>                                     | 105 |
| <b>Figure S100.</b> MS spectrum of <b>32</b>                                      | 106 |
| <b>Figure S101.</b> <sup>1</sup> H NMR spectrum of <b>33</b>                      | 107 |

|                                                                                   |      |
|-----------------------------------------------------------------------------------|------|
| <b>Figure S102.</b> $^{13}\text{C}$ NMR spectrum of <b>33</b>                     | 108  |
| <b>Figure S103.</b> $^{11}\text{B}$ NMR $\{^1\text{H BB}\}$ spectrum of <b>33</b> | 109  |
| <b>Figure S104.</b> UV spectrum of <b>33</b>                                      | 110  |
| <b>Figure S105.</b> IR spectrum of <b>33</b>                                      | 111  |
| <b>Figure S106.</b> HPLC analysis of <b>33</b>                                    | 112  |
| <b>Figure S107.</b> MS spectrum of <b>33</b>                                      | 113  |
| <b>Figure S108.</b> $^1\text{H}$ NMR spectrum of <b>34</b>                        | 114  |
| <b>Figure S109.</b> $^{13}\text{C}$ NMR spectrum of <b>34</b>                     | 115  |
| <b>Figure S110.</b> $^{11}\text{B}$ NMR $\{^1\text{H BB}\}$ spectrum of <b>34</b> | 116  |
| <b>Figure S111.</b> UV spectrum of <b>34</b>                                      | 117  |
| <b>Figure S112.</b> IR spectrum of <b>34</b>                                      | 118  |
| <b>Figure S113.</b> HPLC analysis of <b>34</b>                                    | 119  |
| <b>Figure S114.</b> MS spectrum of <b>34</b>                                      | 120  |
| <b>Figure S115.</b> $^1\text{H}$ NMR spectrum of <b>35</b>                        | 121  |
| <b>Figure S116.</b> $^{13}\text{C}$ NMR spectrum of <b>35</b>                     | 122  |
| <b>Figure S117.</b> $^{11}\text{B}$ NMR $\{^1\text{H BB}\}$ spectrum of <b>35</b> | 123  |
| <b>Figure S118.</b> UV spectrum of <b>35</b>                                      | 124  |
| <b>Figure S119.</b> IR spectrum of <b>35</b>                                      | 125  |
| <b>Figure S120.</b> HPLC analysis of <b>35</b>                                    | 126  |
| <b>Figure S121.</b> MS spectrum of <b>35</b>                                      | 127  |
| <b>Figure S122.</b> HRMS spectrum of <b>35</b>                                    | 128  |
| <b>Figure S123.</b> $^1\text{H}$ NMR spectrum of <b>36</b>                        | 1296 |
| <b>Figure S124.</b> $^{13}\text{C}$ NMR spectrum of <b>36</b>                     | 130  |
| <b>Figure S125.</b> $^{11}\text{B}$ NMR $\{^1\text{H BB}\}$ spectrum of <b>36</b> | 131  |
| <b>Figure S126.</b> UV spectrum of <b>36</b>                                      | 132  |
| <b>Figure S127.</b> IR spectrum of <b>36</b>                                      | 133  |
| <b>Figure S128.</b> HPLC analysis of <b>36</b>                                    | 134  |
| <b>Figure S129.</b> MS spectrum of <b>36</b>                                      | 135  |
| <b>Figure S130.</b> $^1\text{H}$ NMR spectrum of <b>39</b>                        | 136  |
| <b>Figure S131.</b> $^{13}\text{C}$ NMR spectrum of <b>39</b>                     | 137  |
| <b>Figure S132.</b> $^{11}\text{B}$ NMR $\{^1\text{H BB}\}$ spectrum of <b>39</b> | 138  |
| <b>Figure S133.</b> UV spectrum of <b>39</b>                                      | 139  |
| <b>Figure S134.</b> IR spectrum of <b>39</b>                                      | 140  |
| <b>Figure S135.</b> HPLC analysis of <b>39</b>                                    | 141  |
| <b>Figure S136.</b> MS spectrum of <b>39</b>                                      | 142  |
| <b>Figure S137.</b> $^1\text{H}$ NMR spectrum of <b>40</b>                        | 143  |
| <b>Figure S138.</b> $^{13}\text{C}$ NMR spectrum of <b>40</b>                     | 144  |
| <b>Figure S139.</b> $^{11}\text{B}$ NMR $\{^1\text{H BB}\}$ spectrum of <b>40</b> | 145  |
| <b>Figure S140.</b> UV spectrum of <b>40</b>                                      | 146  |
| <b>Figure S141.</b> IR spectrum of <b>40</b>                                      | 147  |
| <b>Figure S142.</b> HPLC analysis of <b>40</b>                                    | 148  |
| <b>Figure S143.</b> MS spectrum of <b>40</b>                                      | 149  |
| <b>Figure S144.</b> HRMS spectrum of <b>40</b>                                    | 150  |
| <b>Figure S145.</b> $^1\text{H}$ NMR spectrum of <b>41</b>                        | 151  |
| <b>Figure S146.</b> $^{13}\text{C}$ NMR spectrum of <b>41</b>                     | 152  |
| <b>Figure S147.</b> IR spectrum of <b>41</b>                                      | 153  |
| <b>Figure S148.</b> UV spectrum of <b>41</b>                                      | 1540 |
| <b>Figure S149.</b> IR spectrum of <b>41</b>                                      | 155  |
| <b>Figure S150.</b> HPLC analysis of <b>41</b>                                    | 156  |
| <b>Figure S151.</b> MS spectrum of <b>41</b>                                      | 157  |
| <b>Figure S152.</b> $^1\text{H}$ NMR spectrum of <b>42</b>                        | 158  |

|                                                                                                                                                                                                                                                          |     |
|----------------------------------------------------------------------------------------------------------------------------------------------------------------------------------------------------------------------------------------------------------|-----|
| <b>Figure S153.</b> $^{13}\text{C}$ NMR spectrum of <b>42</b>                                                                                                                                                                                            | 159 |
| <b>Figure S154.</b> IR spectrum of <b>42</b>                                                                                                                                                                                                             | 160 |
| <b>Figure S155.</b> UV spectrum of <b>42</b>                                                                                                                                                                                                             | 161 |
| <b>Figure S156.</b> IR spectrum of <b>42</b>                                                                                                                                                                                                             | 162 |
| <b>Figure S157.</b> HPLC analysis of <b>42</b>                                                                                                                                                                                                           | 163 |
| <b>Figure S158.</b> MS spectrum of <b>42</b>                                                                                                                                                                                                             | 166 |
| <b>Figure S159.</b> Influence of compound <b>6</b> on cell cycle distribution in HepG2 cells                                                                                                                                                             | 165 |
| <b>Figure S160.</b> ROS production in HepG2 cells after 24 h incubation with compound <b>6-11, 16-20, 32, 39-42</b>                                                                                                                                      | 166 |
| <b>Figure S161.</b> Autofluorescence analysis of the tested compounds in HepG2 cells                                                                                                                                                                     | 167 |
| <b>Figure S162.</b> Flow cytometry analysis of apoptosis/necrosis in HepG2 cells after cell toxicity induction with compound <b>6</b>                                                                                                                    | 168 |
| <b>Table 1S.</b> Percentage distribution of early and late apoptotic and necrotic cells assessed by flow cytometry                                                                                                                                       | 169 |
| <b>Figure S163.</b> Flow cytometry analysis of apoptosis/necrosis in HepG2 cells after cell toxicity induction with compound <b>31</b>                                                                                                                   | 170 |
| <b>Figure S164.</b> Flow cytometry analysis of autophagy in HepG2 cells after cell toxicity induction with compound <b>8</b>                                                                                                                             | 171 |
| <b>Figure S1651.</b> Flow cytometry analysis of lipid peroxidation in HepG2 cells after cell toxicity induction with compound <b>15</b>                                                                                                                  | 172 |
| <b>Figure S166.</b> Human Topoisomerase II $\alpha$ relaxation assay                                                                                                                                                                                     | 173 |
| <b>Figure S167.</b> Melting curves of ct-DNA upon addition of <b>6-11</b>                                                                                                                                                                                | 174 |
| <b>Figure S168.</b> Melting curves of ct-DNA upon addition of <b>15-20</b>                                                                                                                                                                               | 175 |
| <b>Figure S169.</b> Melting curves of ct-DNA upon addition of <b>31-36</b>                                                                                                                                                                               | 176 |
| <b>Figure S170.</b> Melting curves of ct-DNA upon addition of <b>39-42</b>                                                                                                                                                                               | 177 |
| <b>Figure S171.</b> Melting curves of ct-DNA upon addition of mitonafide and pinafide                                                                                                                                                                    | 178 |
| <b>Figure S172.</b> Changes in the CD spectrum of ct-DNA upon addition of mitonafide and pinafide                                                                                                                                                        | 179 |
| <b>Figure S173.</b> Changes in the CD spectrum of ct-DNA upon addition of <b>6</b> and <b>7</b>                                                                                                                                                          | 180 |
| <b>Figure S174.</b> Changes in the CD spectrum of ct-DNA upon addition of <b>8</b> and <b>9</b>                                                                                                                                                          | 181 |
| <b>Figure S175.</b> Changes in the CD spectrum of ct-DNA upon addition of <b>10</b> and <b>11</b>                                                                                                                                                        | 182 |
| <b>Figure S176.</b> Changes in the CD spectrum of ct-DNA upon addition of <b>15</b> and <b>16</b>                                                                                                                                                        | 183 |
| <b>Figure S177.</b> Changes in the CD spectrum of ct-DNA upon addition of <b>17</b> and <b>18</b>                                                                                                                                                        | 184 |
| <b>Figure S178.</b> Changes in the CD spectrum of ct-DNA upon addition of <b>19</b> and <b>20</b>                                                                                                                                                        | 185 |
| <b>Figure S179.</b> Changes in the CD spectrum of ct-DNA upon addition of <b>31</b> and <b>32</b>                                                                                                                                                        | 186 |
| <b>Figure S180.</b> Changes in the CD spectrum of ct-DNA upon addition of <b>33</b> and <b>34</b>                                                                                                                                                        | 187 |
| <b>Figure S181.</b> Changes in the CD spectrum of ct-DNA upon addition of <b>35</b> and <b>36</b>                                                                                                                                                        | 188 |
| <b>Figure S182.</b> Changes in the CD spectrum of ct-DNA upon addition of <b>39</b> and <b>40</b>                                                                                                                                                        | 189 |
| <b>Figure S183.</b> Changes in the CD spectrum of ct-DNA upon addition of <b>41</b> and <b>42</b>                                                                                                                                                        | 190 |
| <b>Figure S184.</b> UV-vis absorption spectra of compound <b>6</b> (20 $\mu\text{M}$ ) in the presence of increasing amount of ct-DNA (0-15 $\mu\text{M}$ ) (left). The plot of $A_0/A-A_0$ versus $1/[\text{DNA}]$ yielded the binding constant (right) | 191 |
| <b>Figure S185.</b> UV-vis absorption spectra of compound <b>7</b> (20 $\mu\text{M}$ ) in the presence of increasing amount of ct-DNA (0-15 $\mu\text{M}$ ) (left). The plot of $A_0/A-A_0$ versus $1/[\text{DNA}]$ yielded the binding constant (right) | 192 |
| <b>Figure S186.</b> UV-vis absorption spectra of compound <b>8</b> (20 $\mu\text{M}$ ) in the presence of increasing amount of ct-DNA (0-15 $\mu\text{M}$ ) (left). The plot of $A_0/A-A_0$ versus $1/[\text{DNA}]$ yielded the binding constant (right) | 193 |
| <b>Figure S187.</b> UV-vis absorption spectra of compound <b>9</b> (20 $\mu\text{M}$ ) in the presence of increasing amount of ct-DNA (0-15 $\mu\text{M}$ ) (left). The plot of $A_0/A-A_0$ versus $1/[\text{DNA}]$ yielded the binding constant (right) | 194 |

|                                                                                                                                                                                                                                                           |     |
|-----------------------------------------------------------------------------------------------------------------------------------------------------------------------------------------------------------------------------------------------------------|-----|
| <b>Figure S188.</b> UV-vis absorption spectra of compound <b>10</b> (20 $\mu\text{M}$ ) in the presence of increasing amount of ct-DNA (0-15 $\mu\text{M}$ ) (left). The plot of $A_0/A-A_0$ versus $1/[\text{DNA}]$ yielded the binding constant (right) | 195 |
| <b>Figure S189.</b> UV-vis absorption spectra of compound <b>11</b> (20 $\mu\text{M}$ ) in the presence of increasing amount of ct-DNA (0-15 $\mu\text{M}$ ) (left). The plot of $A_0/A-A_0$ versus $1/[\text{DNA}]$ yielded the binding constant (right) | 196 |
| <b>Figure S190.</b> UV-vis absorption spectra of compound <b>15</b> (20 $\mu\text{M}$ ) in the presence of increasing amount of ct-DNA (0-15 $\mu\text{M}$ ) (left). The plot of $A_0/A-A_0$ versus $1/[\text{DNA}]$ yielded the binding constant (right) | 197 |
| <b>Figure S191.</b> UV-vis absorption spectra of compound <b>16</b> (20 $\mu\text{M}$ ) in the presence of increasing amount of ct-DNA (0-15 $\mu\text{M}$ ) (left). The plot of $A_0/A-A_0$ versus $1/[\text{DNA}]$ yielded the binding constant (right) | 198 |
| <b>Figure S192.</b> UV-vis absorption spectra of compound <b>17</b> (20 $\mu\text{M}$ ) in the presence of increasing amount of ct-DNA (0-15 $\mu\text{M}$ ) (left). The plot of $A_0/A-A_0$ versus $1/[\text{DNA}]$ yielded the binding constant (right) | 199 |
| <b>Figure S193.</b> UV-vis absorption spectra of compound <b>18</b> (20 $\mu\text{M}$ ) in the presence of increasing amount of ct-DNA (0-15 $\mu\text{M}$ ) (left). The plot of $A_0/A-A_0$ versus $1/[\text{DNA}]$ yielded the binding constant (right) | 200 |
| <b>Figure S194.</b> UV-vis absorption spectra of compound <b>19</b> (20 $\mu\text{M}$ ) in the presence of increasing amount of ct-DNA (0-15 $\mu\text{M}$ ) (left). The plot of $A_0/A-A_0$ versus $1/[\text{DNA}]$ yielded the binding constant (right) | 201 |
| <b>Figure S195.</b> UV-vis absorption spectra of compound <b>20</b> (20 $\mu\text{M}$ ) in the presence of increasing amount of ct-DNA (0-15 $\mu\text{M}$ ) (left). The plot of $A_0/A-A_0$ versus $1/[\text{DNA}]$ yielded the binding constant (right) | 202 |
| <b>Figure S196.</b> UV-vis absorption spectra of compound <b>33</b> (20 $\mu\text{M}$ ) in the presence of increasing amount of ct-DNA (0-15 $\mu\text{M}$ ) (left). The plot of $A_0/A-A_0$ versus $1/[\text{DNA}]$ yielded the binding constant (right) | 203 |
| <b>Figure S197.</b> UV-vis absorption spectra of compound <b>34</b> (20 $\mu\text{M}$ ) in the presence of increasing amount of ct-DNA (0-15 $\mu\text{M}$ ) (left). The plot of $A_0/A-A_0$ versus $1/[\text{DNA}]$ yielded the binding constant (right) | 204 |
| <b>Figure S198.</b> UV-vis absorption spectra of compound <b>35</b> (20 $\mu\text{M}$ ) in the presence of increasing amount of ct-DNA (0-15 $\mu\text{M}$ ) (left). The plot of $A_0/A-A_0$ versus $1/[\text{DNA}]$ yielded the binding constant (right) | 205 |
| <b>Figure S199.</b> UV-vis absorption spectra of compound <b>36</b> (20 $\mu\text{M}$ ) in the presence of increasing amount of ct-DNA (0-15 $\mu\text{M}$ ) (left). The plot of $A_0/A-A_0$ versus $1/[\text{DNA}]$ yielded the binding constant (right) | 206 |
| <b>Figure S200.</b> UV-vis absorption spectra of compound <b>39</b> (20 $\mu\text{M}$ ) in the presence of increasing amount of ct-DNA (0-15 $\mu\text{M}$ ) (left). The plot of $A_0/A-A_0$ versus $1/[\text{DNA}]$ yielded the binding constant (right) | 207 |
| <b>Figure S201.</b> UV-vis absorption spectra of compound <b>40</b> (20 $\mu\text{M}$ ) in the presence of increasing amount of ct-DNA (0-15 $\mu\text{M}$ ) (left). The plot of $A_0/A-A_0$ versus $1/[\text{DNA}]$ yielded the binding constant (right) | 208 |
| <b>Figure S202.</b> UV-vis absorption spectra of mitonafide (20 $\mu\text{M}$ ) in the presence of increasing amount of ct-DNA (0-15 $\mu\text{M}$ ) (left). The plot of $A_0/A-A_0$ versus $1/[\text{DNA}]$ yielded the binding constant (right)         | 209 |
| <b>Figure S203.</b> UV-vis absorption spectra of pinafide (20 $\mu\text{M}$ ) in the presence of increasing amount of ct-DNA (0-15 $\mu\text{M}$ ) (left). The plot of $A_0/A-A_0$ versus $1/[\text{DNA}]$ yielded the binding constant (right)           | 210 |
| <b>Table 2S.</b> Crystallographic data                                                                                                                                                                                                                    | 211 |

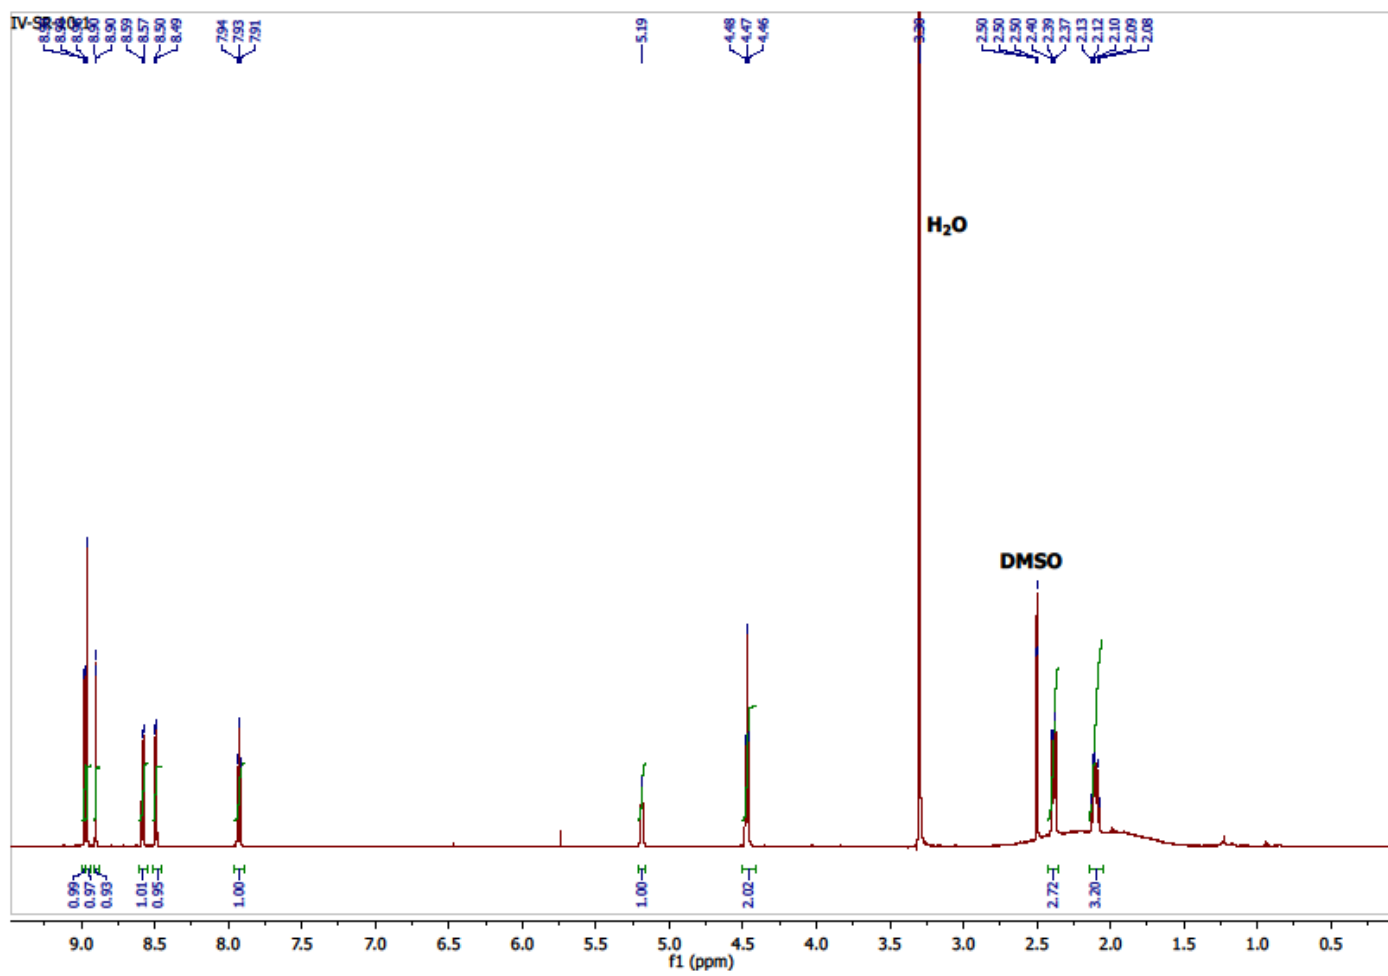

Figure S1. <sup>1</sup>H NMR spectrum of 6.

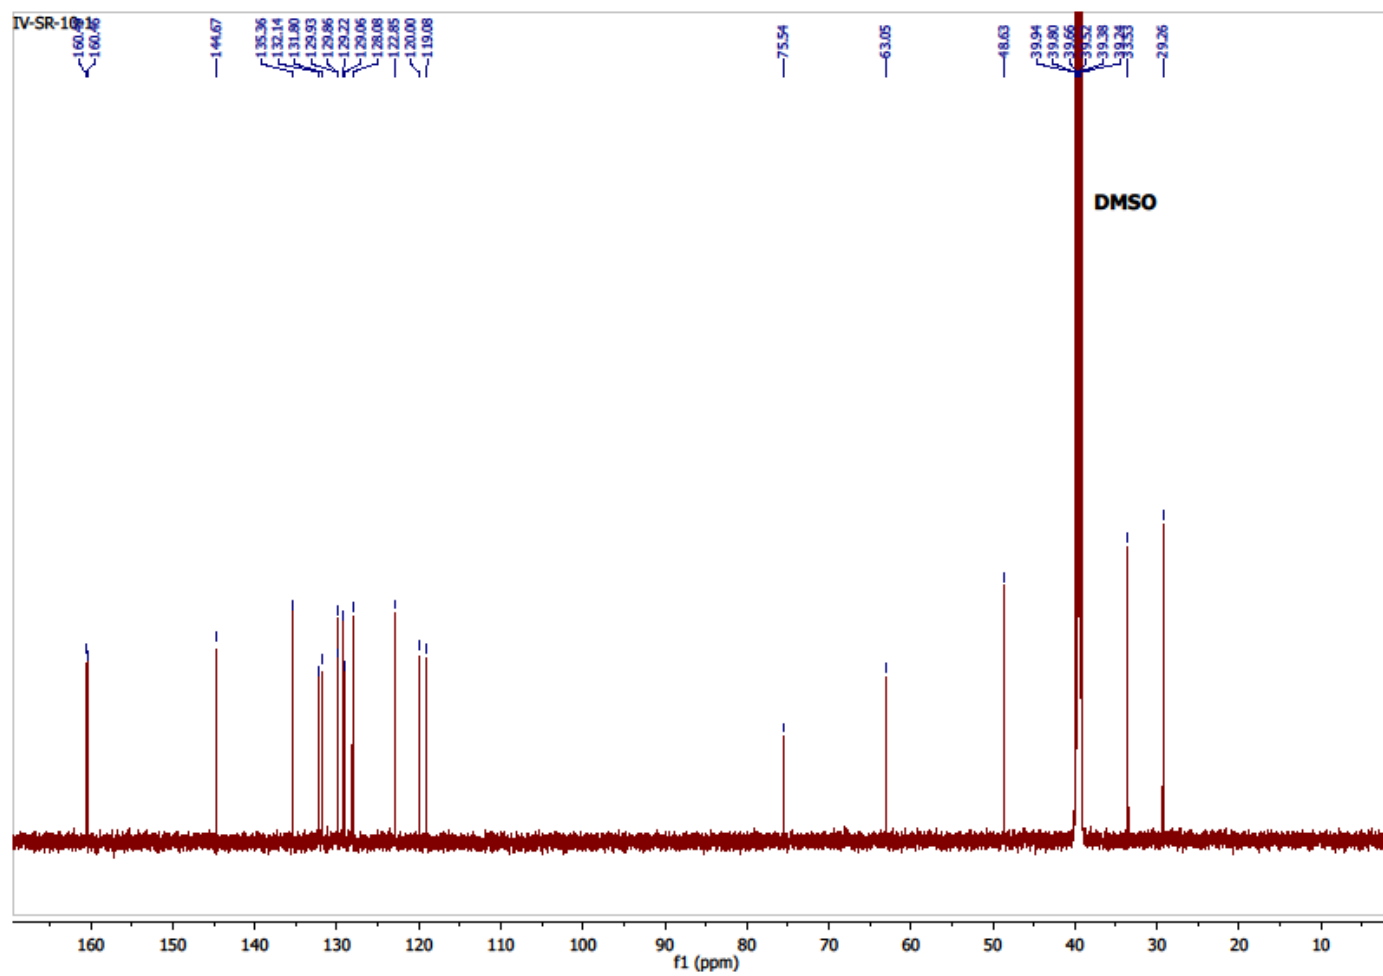

Figure S2.  $^{13}\text{C}$  NMR spectrum of 6.



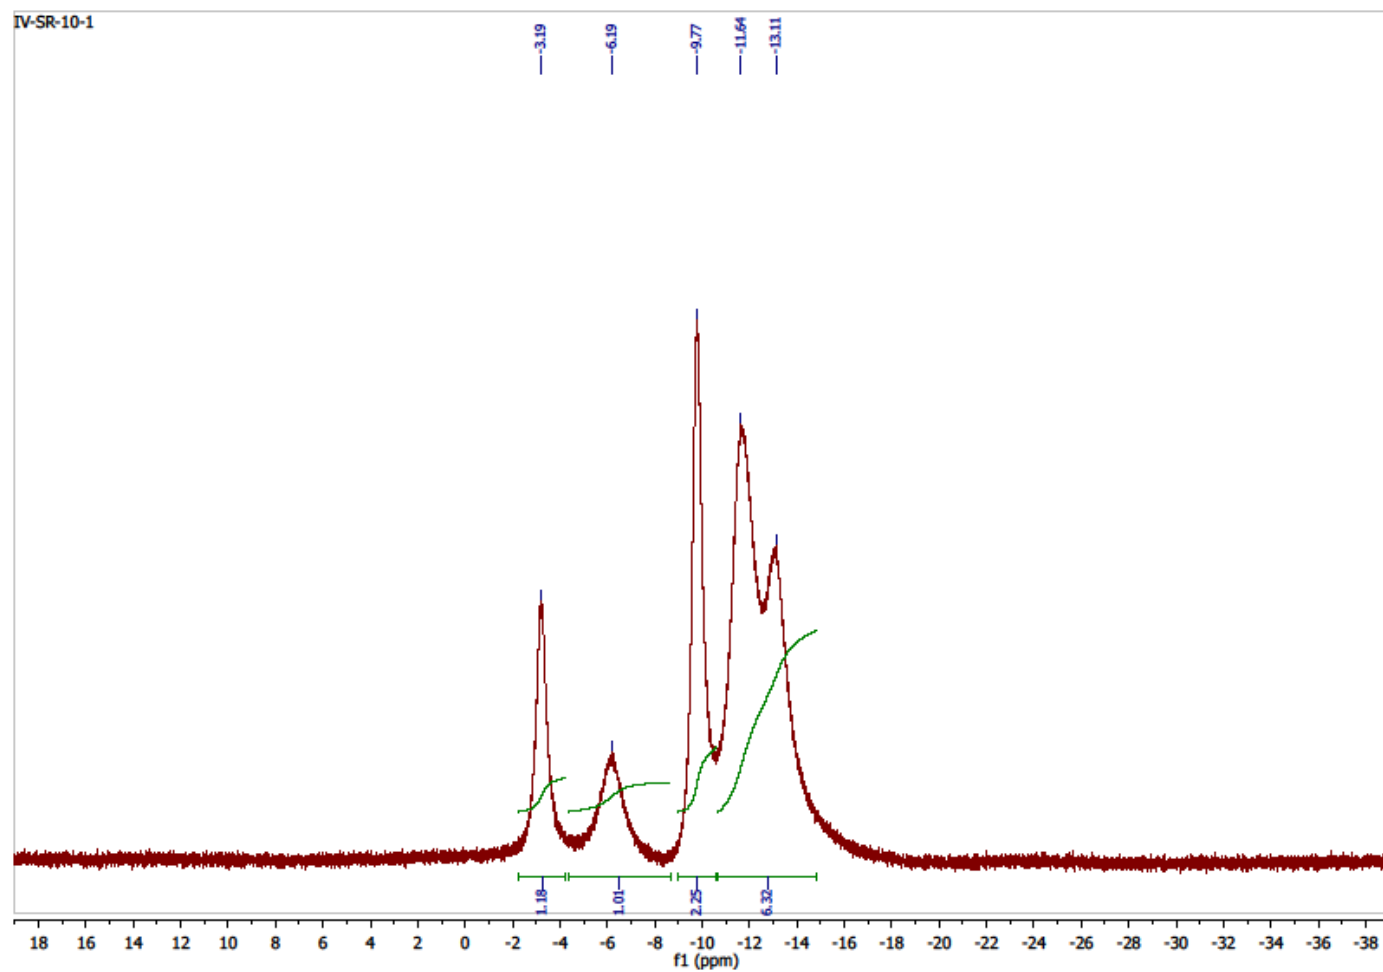

Figure S3.  $^{11}\text{B}$  NMR  $\{^1\text{H BB}\}$  spectrum of **6**.

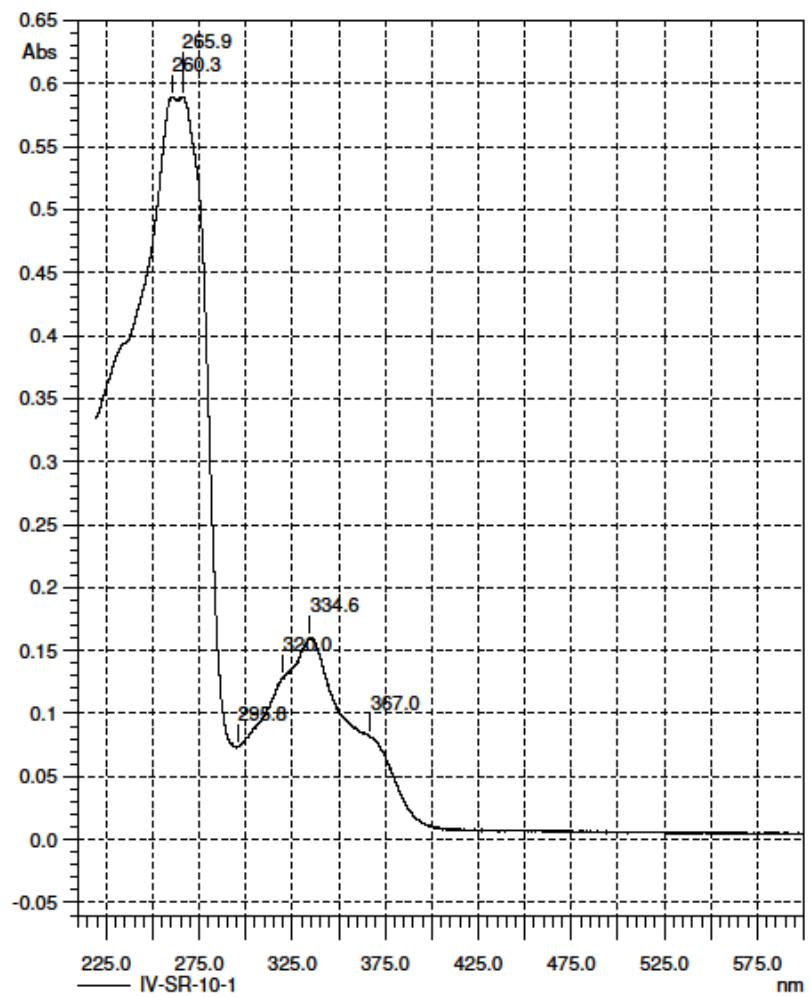

Figure S4. UV spectrum of 6.

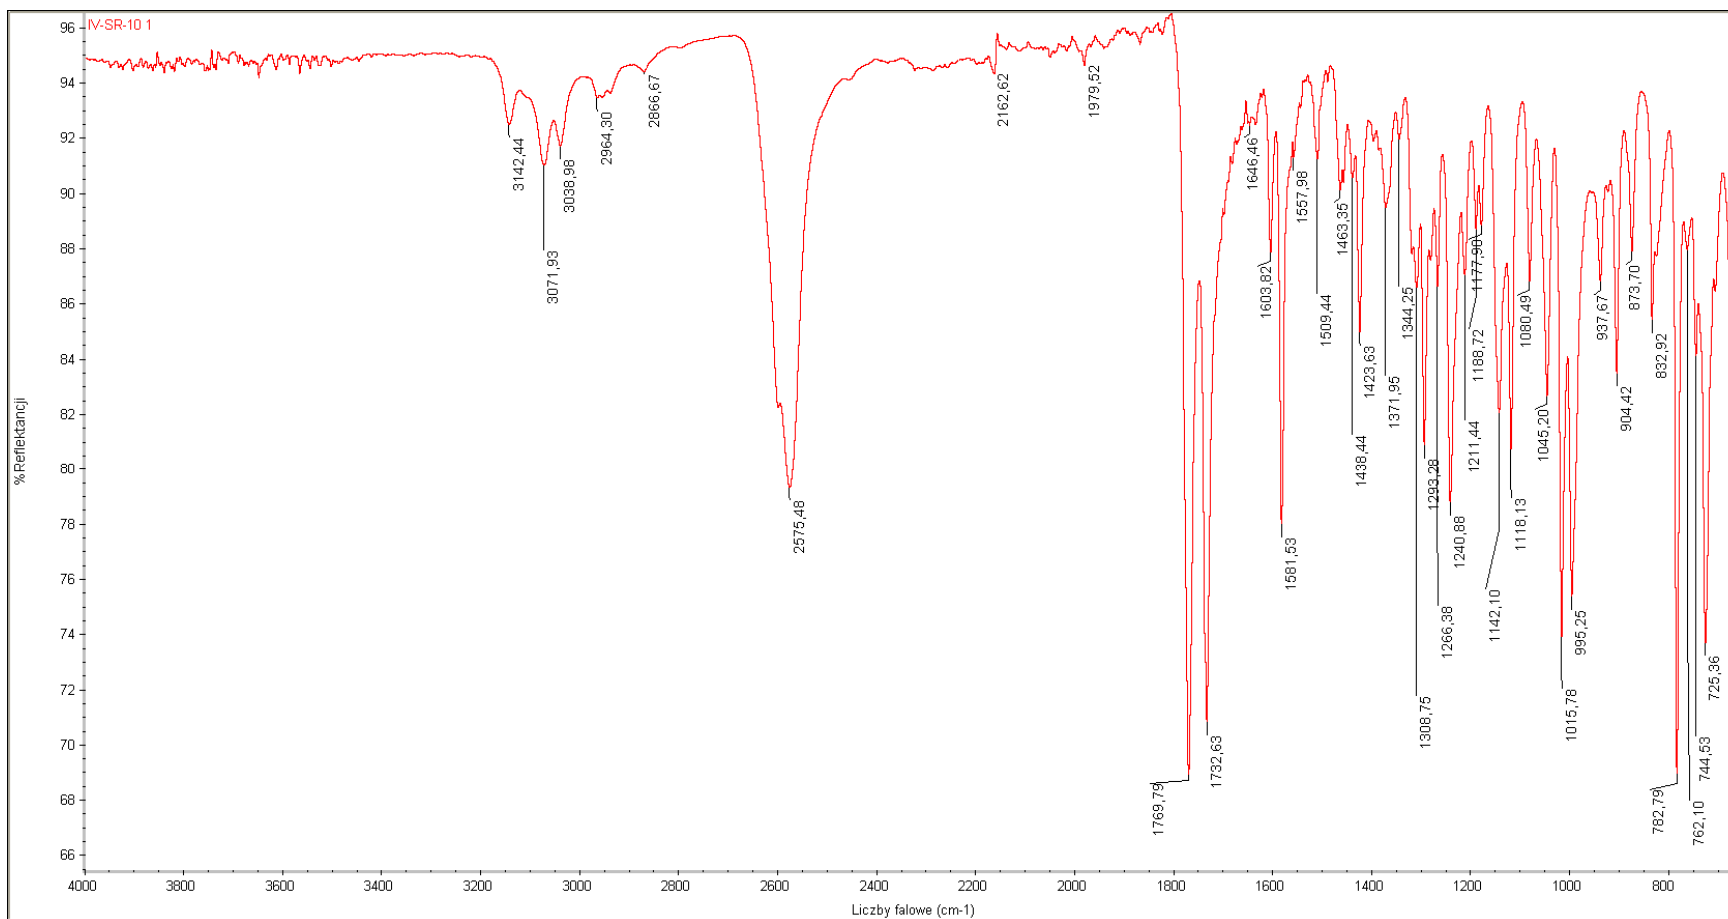

Figure S5. IR spectrum of 6.

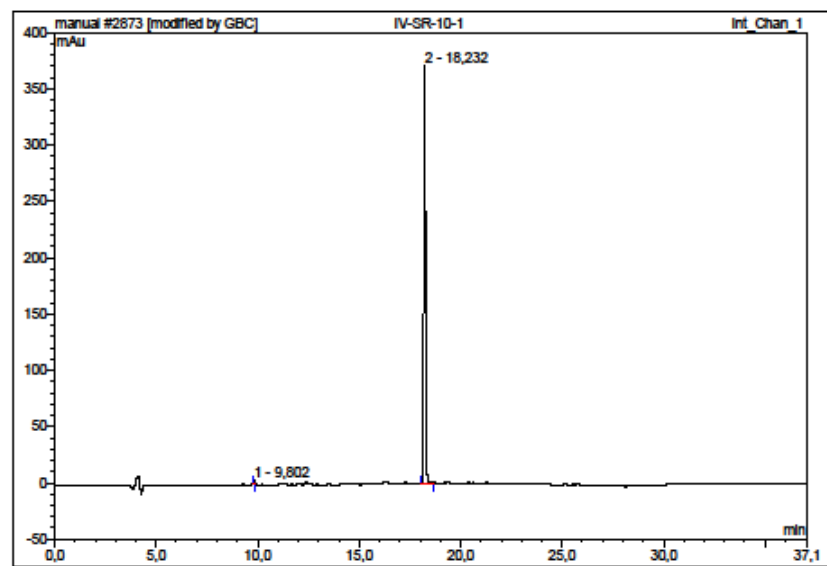

| No.           | Ret. Time<br>min | Peak Name | Height<br>mAu | Area<br>mAu*min | Rel. Area<br>% | Amount | Type |
|---------------|------------------|-----------|---------------|-----------------|----------------|--------|------|
| 1             | 9,80             | n.a.      | 2,985         | 0,240           | 0,63           | n.a.   | BMB* |
| 2             | 18,23            | n.a.      | 371,895       | 37,820          | 99,37          | n.a.   | BMB  |
| <b>Total:</b> |                  |           | 374,880       | 38,060          | 100,00         | 0,000  |      |

Figure S6. HPLC analysis of 6.

Spectrum Name: IV-SR-10\_1\_PT  
Start Ion: 400  
End Ion: 600  
Source: APCI + 10.0µA 400C  
Capillary: 180V 300C Offset: 30V Span: 20V

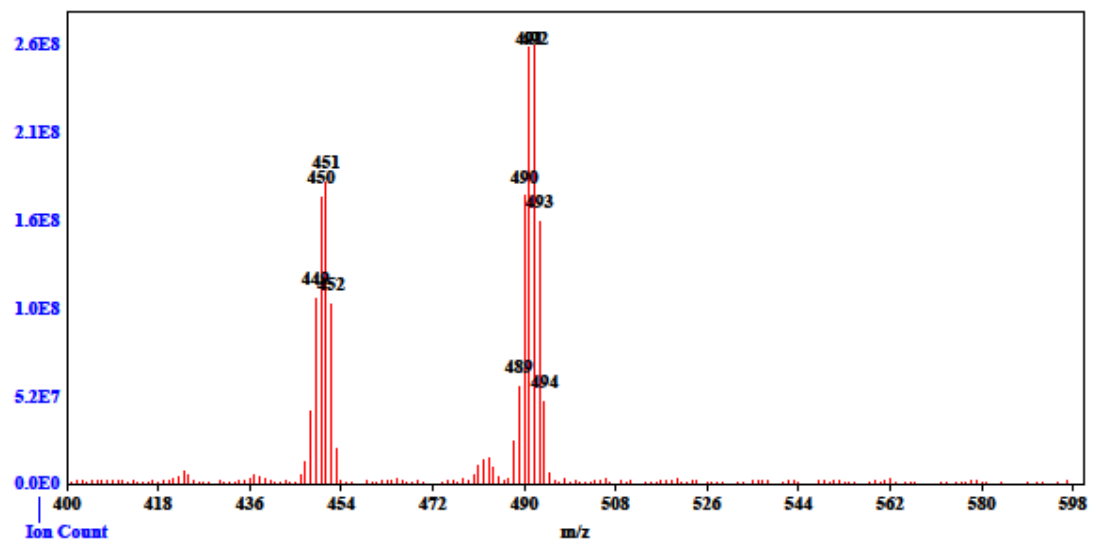

Figure S7. MS spectrum of 6.

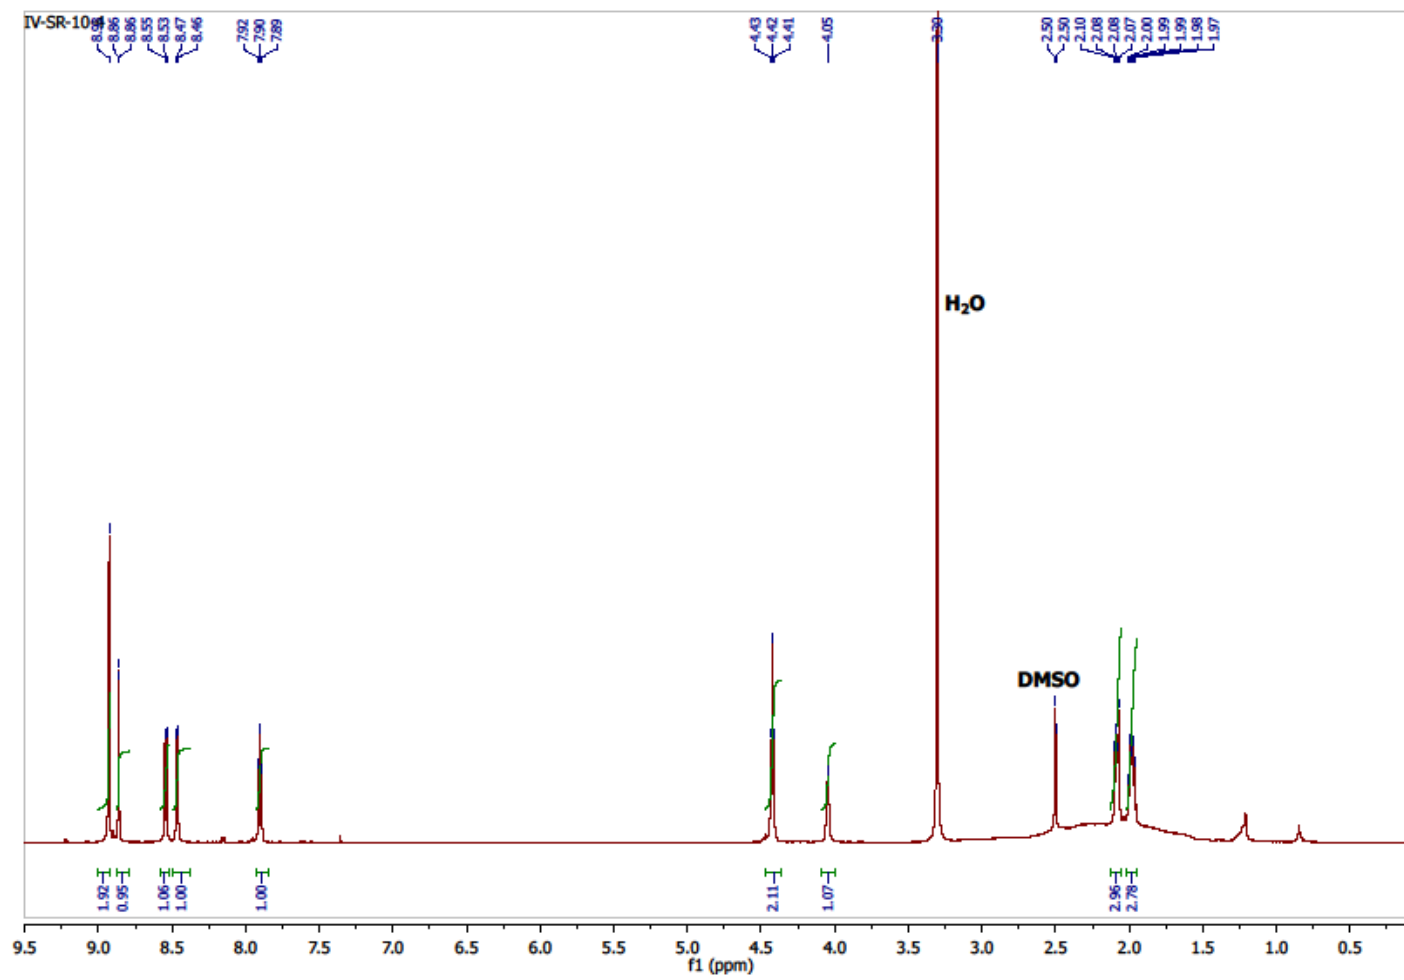

Figure S8. <sup>1</sup>H NMR spectrum of 7.

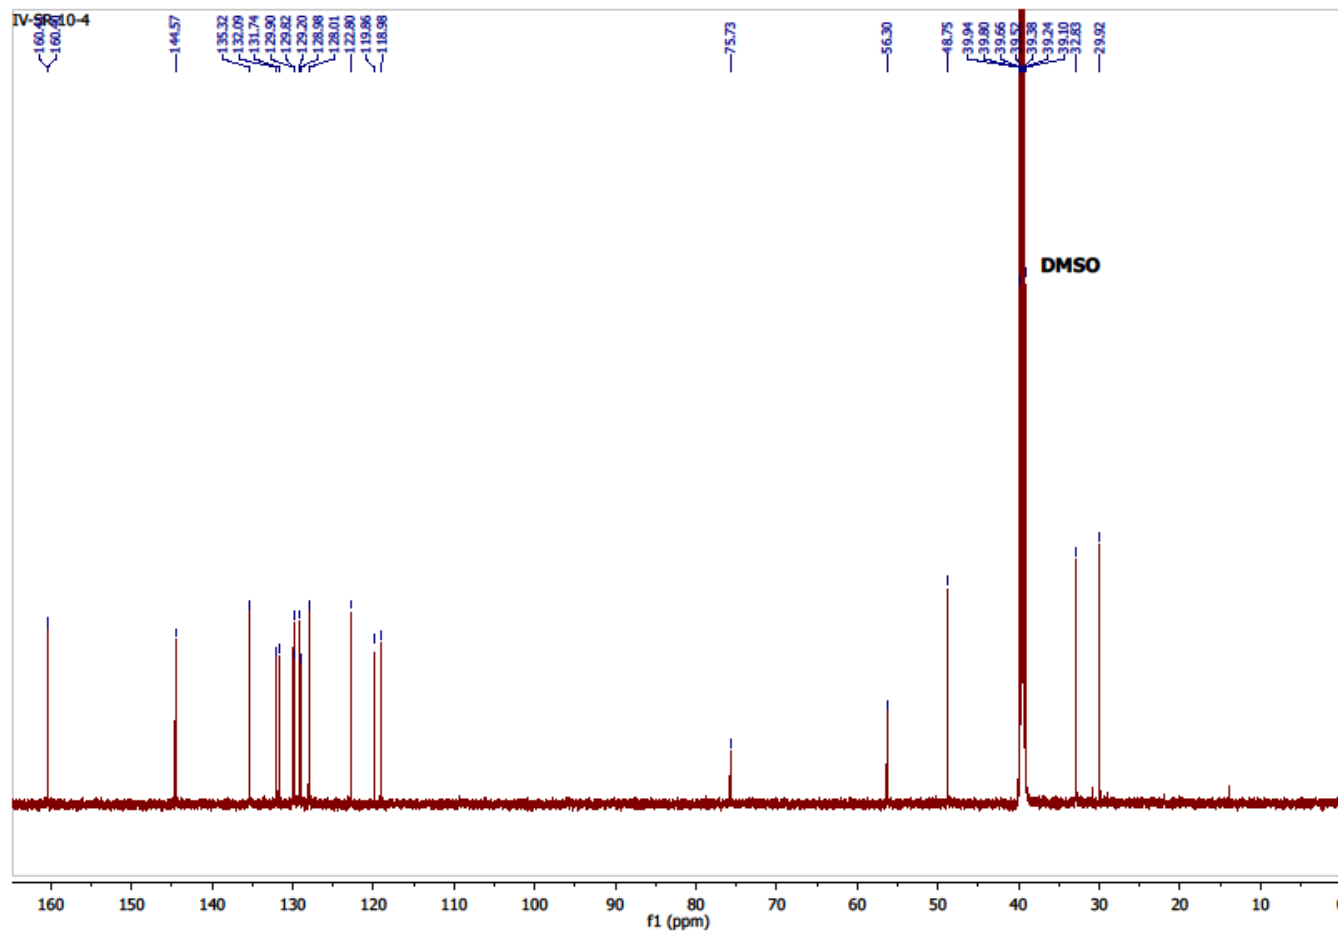

Figure S9.  $^{13}\text{C}$  NMR spectrum of 7.

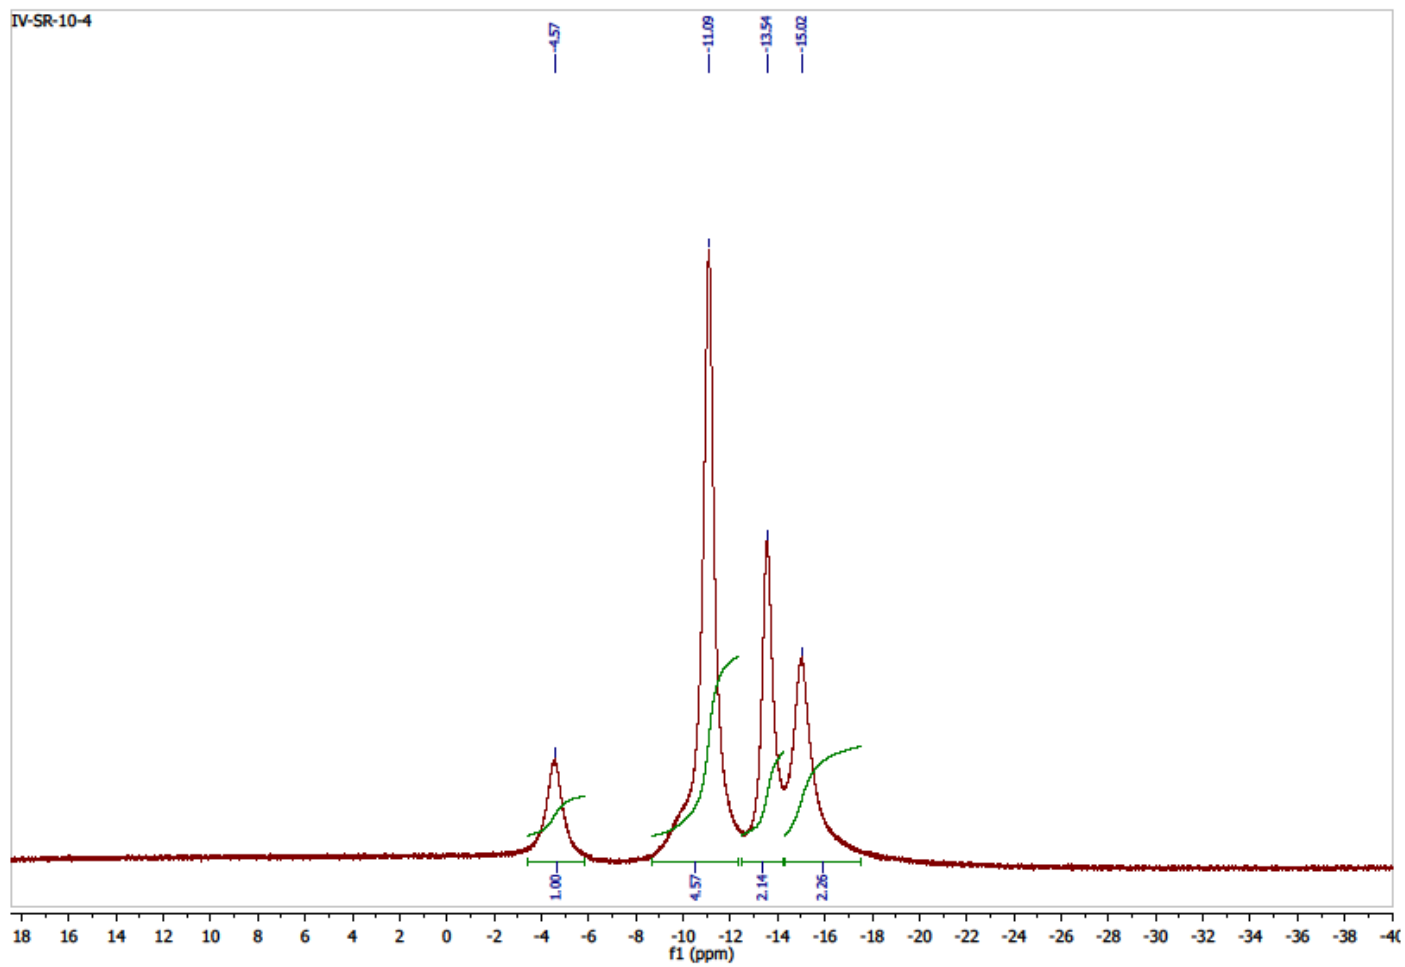

Figure S10.  $^{11}\text{B}$  NMR  $\{^1\text{H BB}\}$  spectrum of 7.



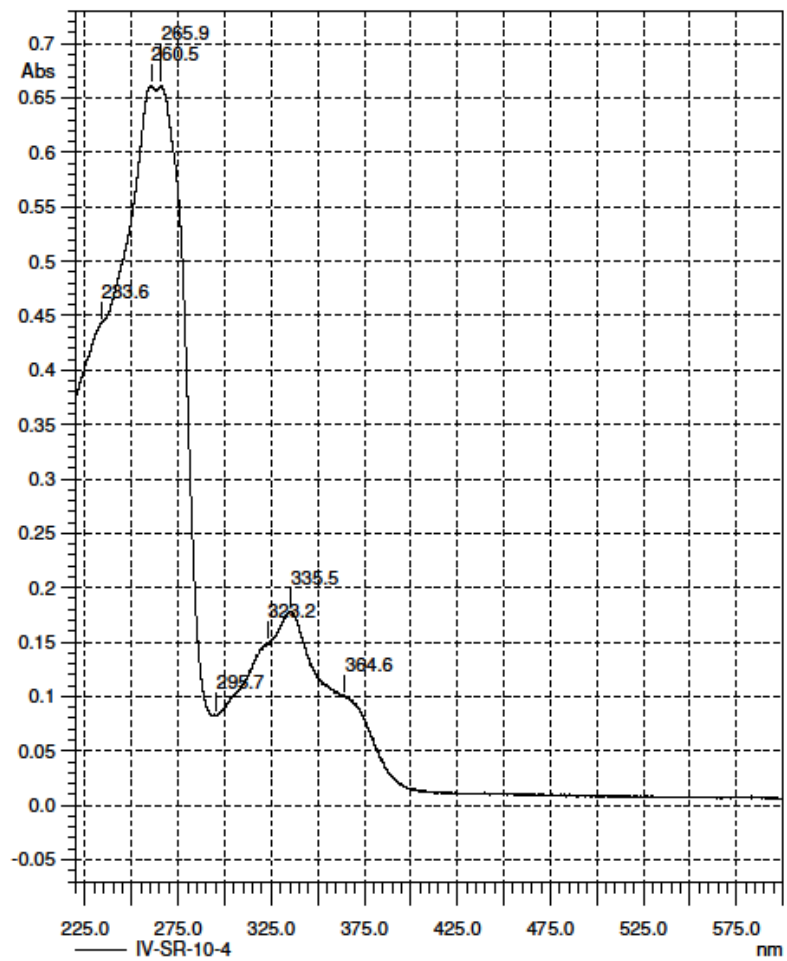

Figure S11. UV spectrum of 7.

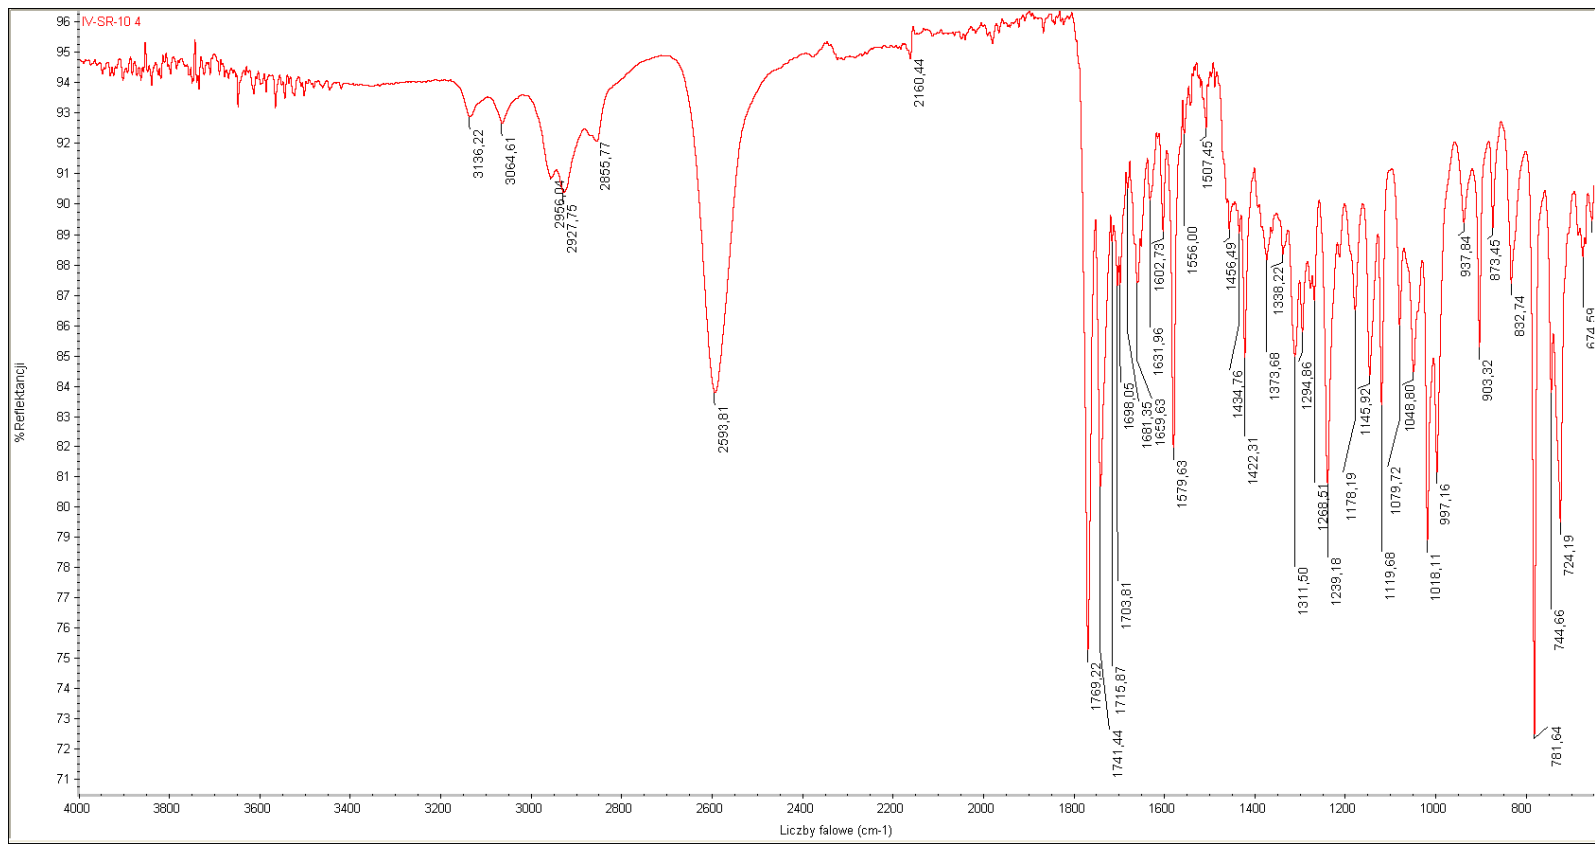

Figure S12. IR spectrum of 7.

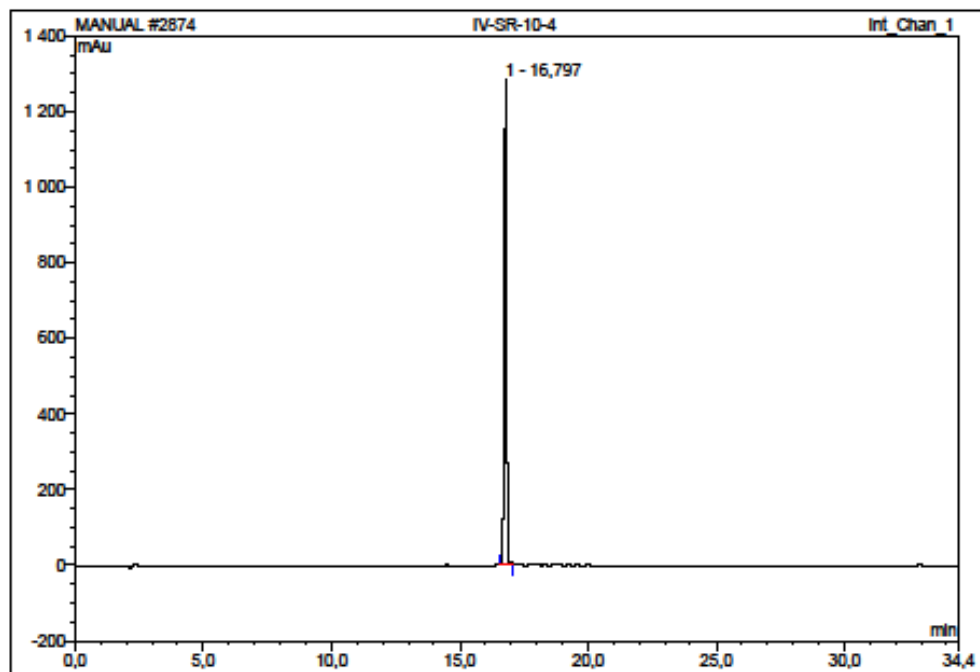

| No.           | Ret.Time<br>min | Peak Name | Height<br>mAu | Area<br>mAu <sup>2</sup> min | Rel.Area<br>% | Amount | Type |
|---------------|-----------------|-----------|---------------|------------------------------|---------------|--------|------|
| 1             | 16,80           | n.a.      | 1281,764      | 135,115                      | 100,00        | n.a.   | BMB  |
| <b>Total:</b> |                 |           | 1281,764      | 135,115                      | 100,00        | 0,000  |      |

Figure S13. HPLC analysis of 7.

Spectrum Name: IV-SR-10\_4  
Start Ion: 400  
End Ion: 600  
Source: APCI + 10.0µA 400C  
Capillary: 180V 300C Offset: 30V Span: 20V

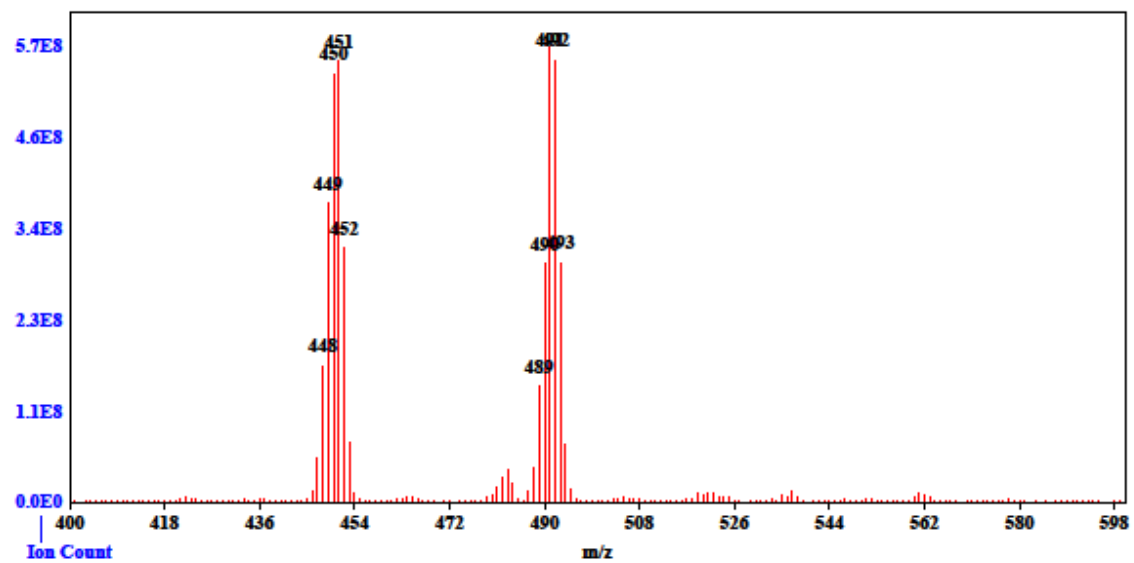

Figure S14. MS spectrum of 7.

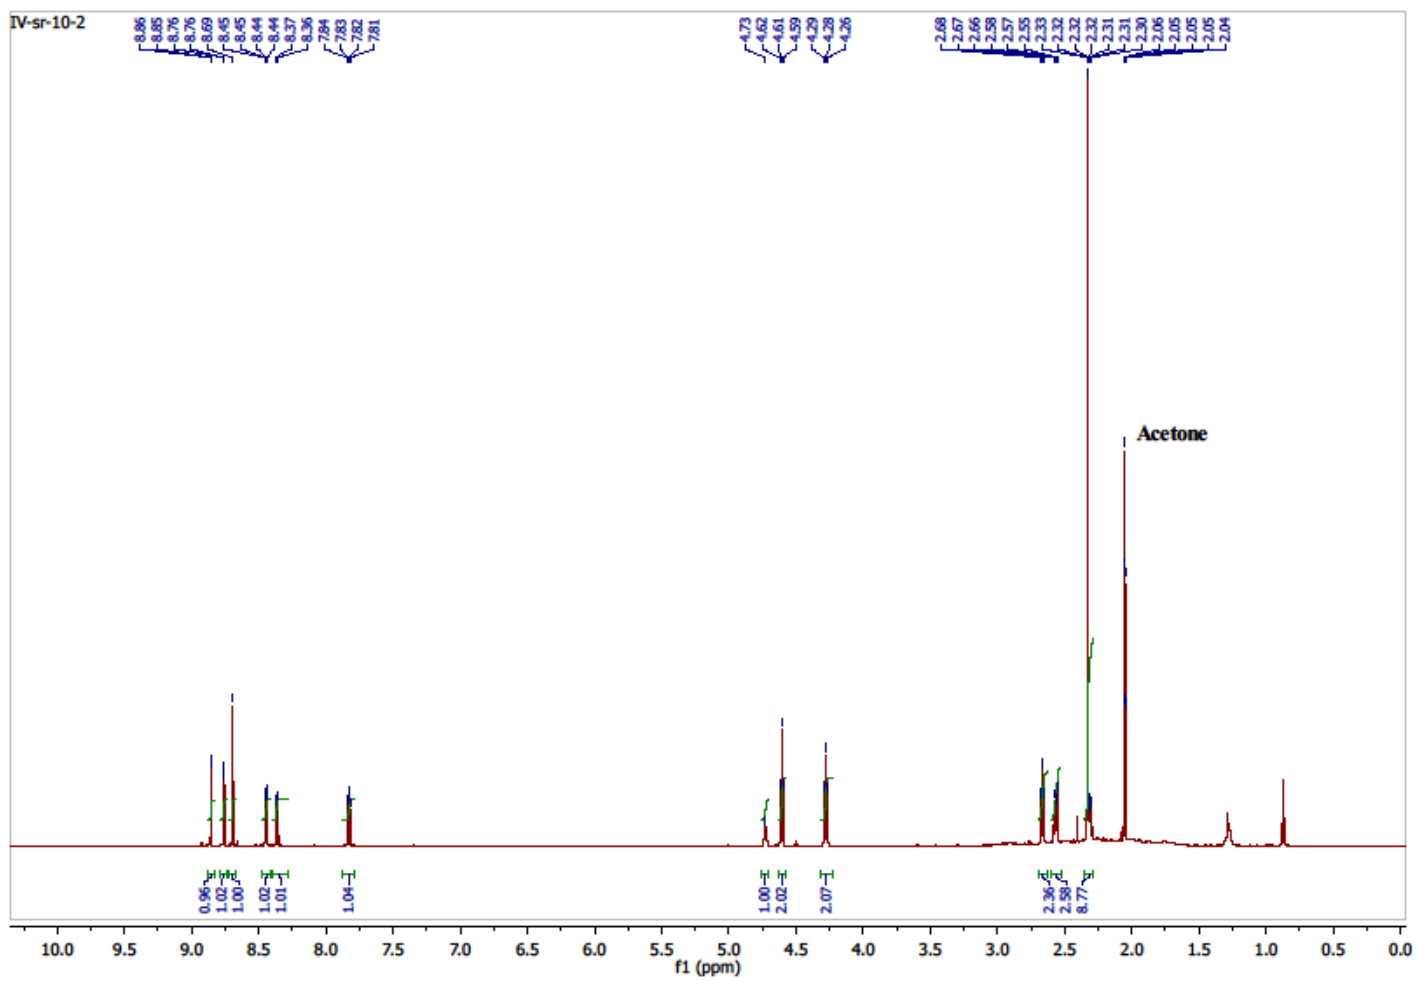

Figure S15. <sup>1</sup>H NMR spectrum of 8.

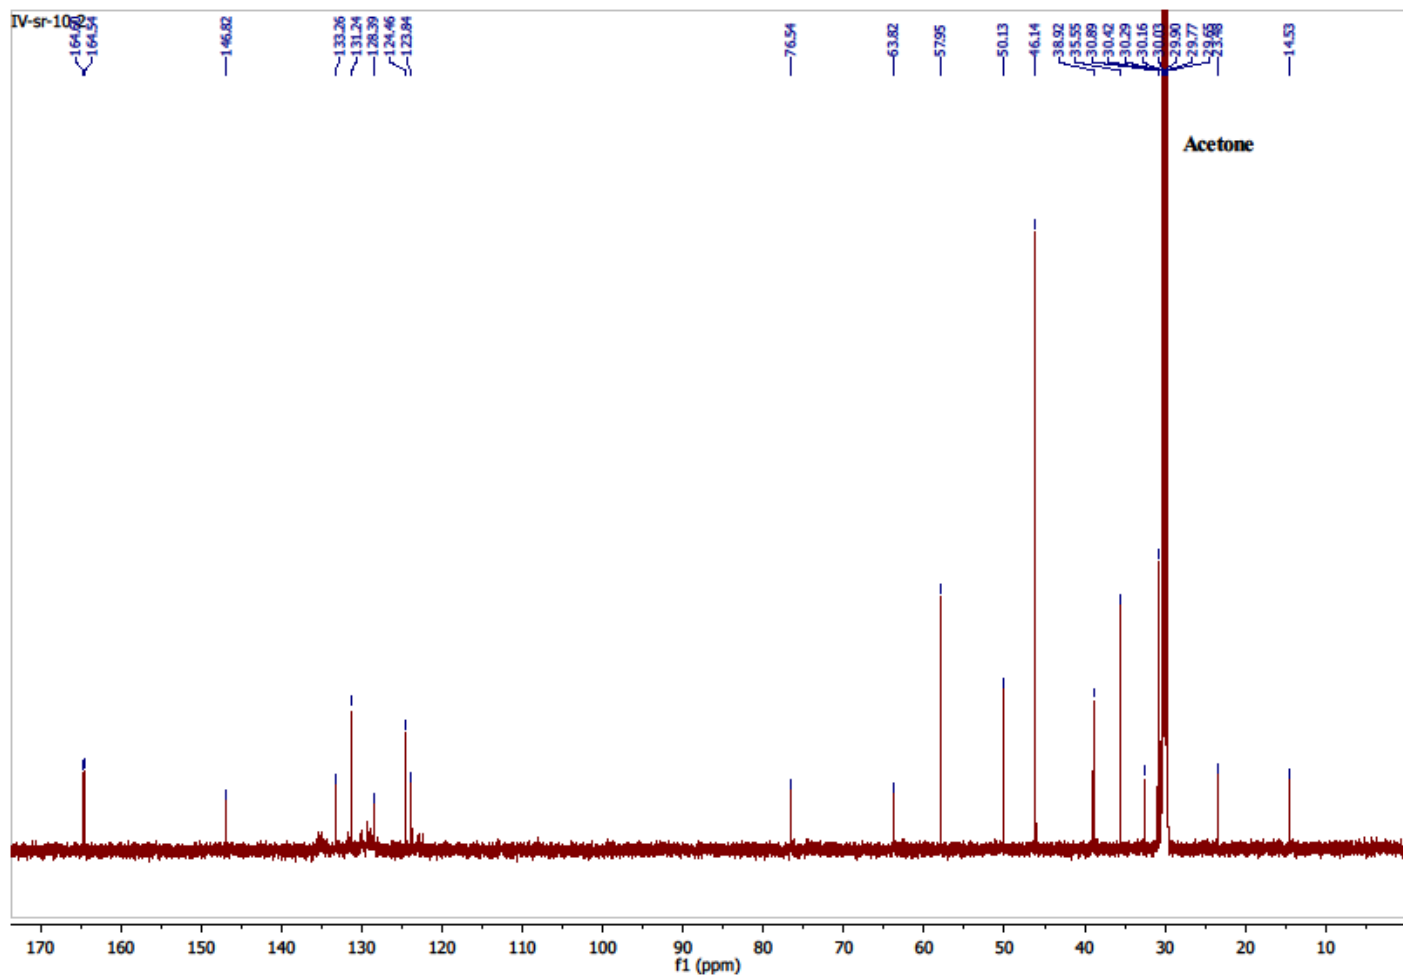

Figure S16.  $^{13}\text{C}$  NMR spectrum of 8.

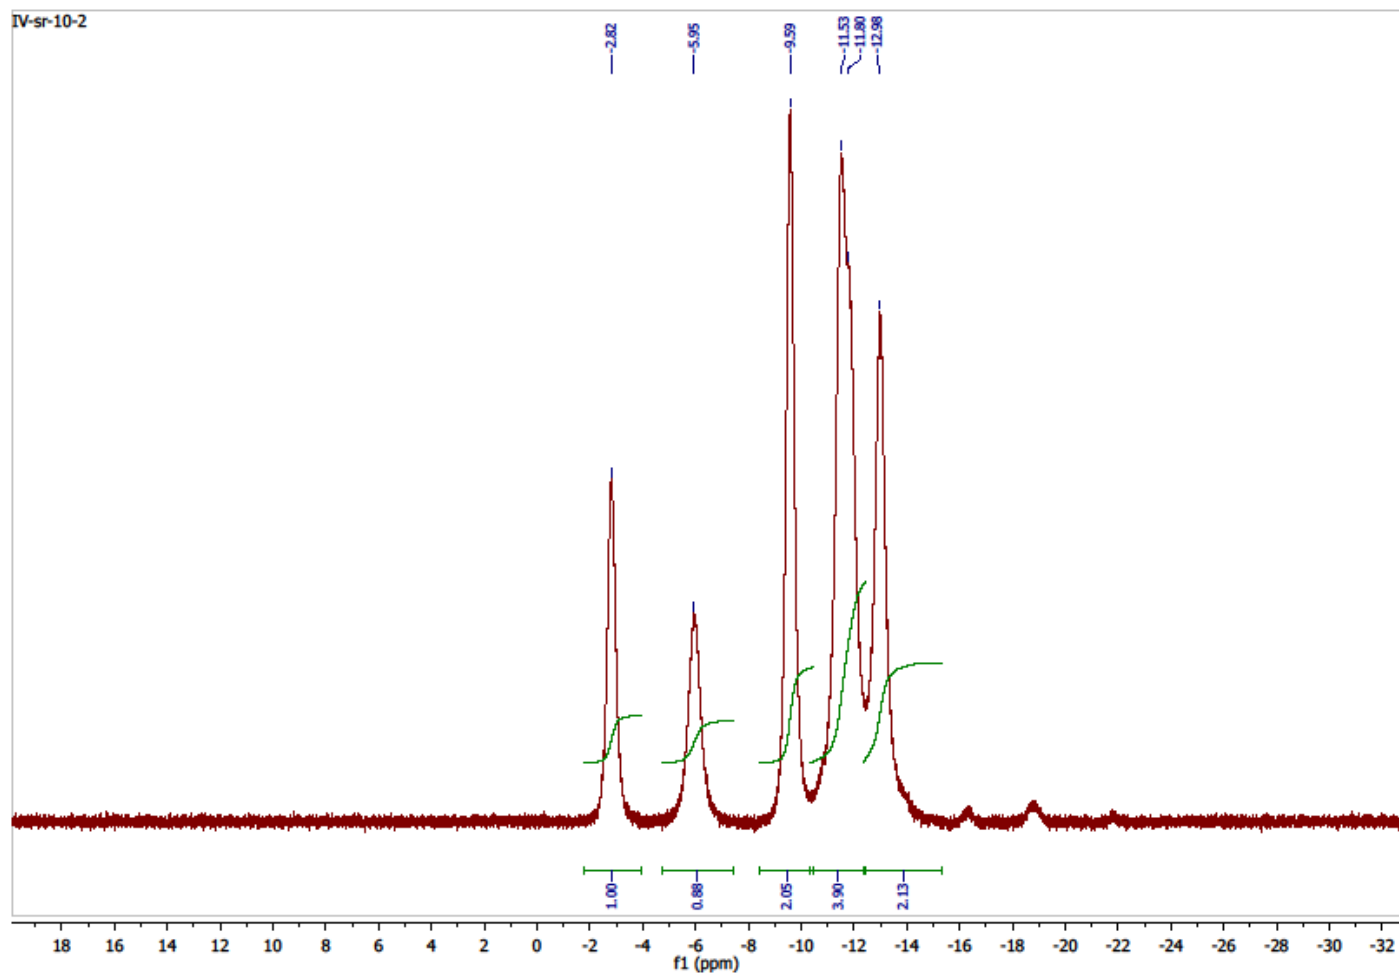

Figure S17.  $^{11}\text{B}$  NMR ( $^1\text{H}$  BB) spectrum of 8.

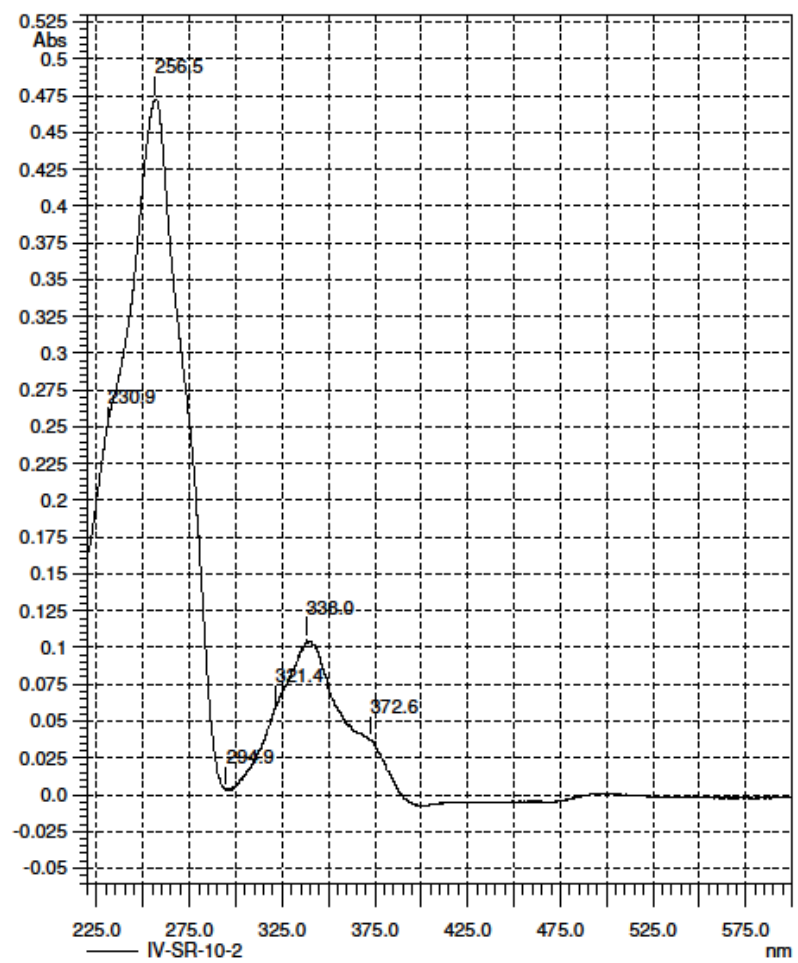

Figure S18. UV spectrum of 8.



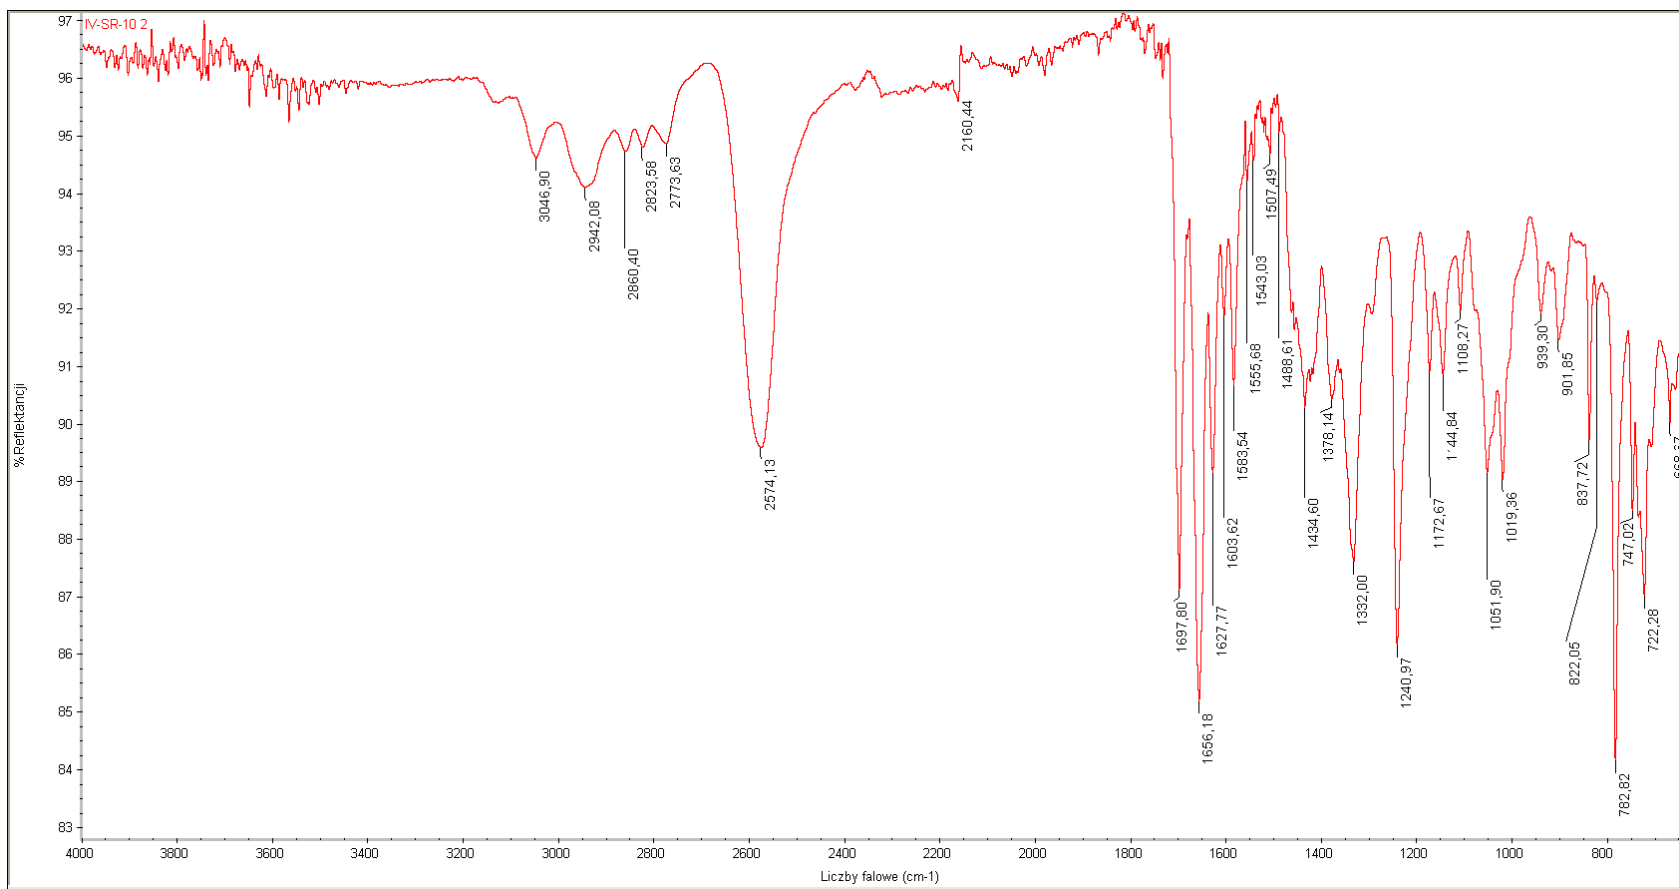

Figure S19. IR spectrum of 8.

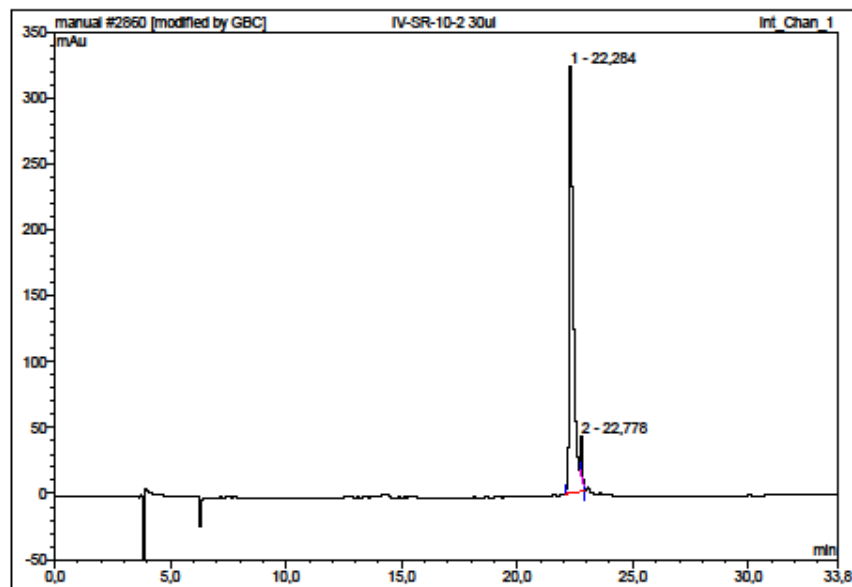

| No.           | Ret.Time<br>min | Peak Name | Height<br>mAu | Area<br>mAu*min | Rel.Area<br>% | Amount | Type |
|---------------|-----------------|-----------|---------------|-----------------|---------------|--------|------|
| 1             | 22,28           | n.a.      | 324,260       | 69,327          | 96,50         | n.a.   | BMB* |
| 2             | 22,78           | n.a.      | 30,615        | 2,511           | 3,50          | n.a.   | Rd*  |
| <b>Total:</b> |                 |           | 354,875       | 71,838          | 100,00        | 0,000  |      |

Figure S20. HPLC analysis of 8.

Spectrum Name: IV-SR-10\_2\_PT  
Start Ion: 300  
End Ion: 700  
Source: APCI + 10.0µA 400C  
Capillary: 150V 300C Offset: 25V Span: 0V

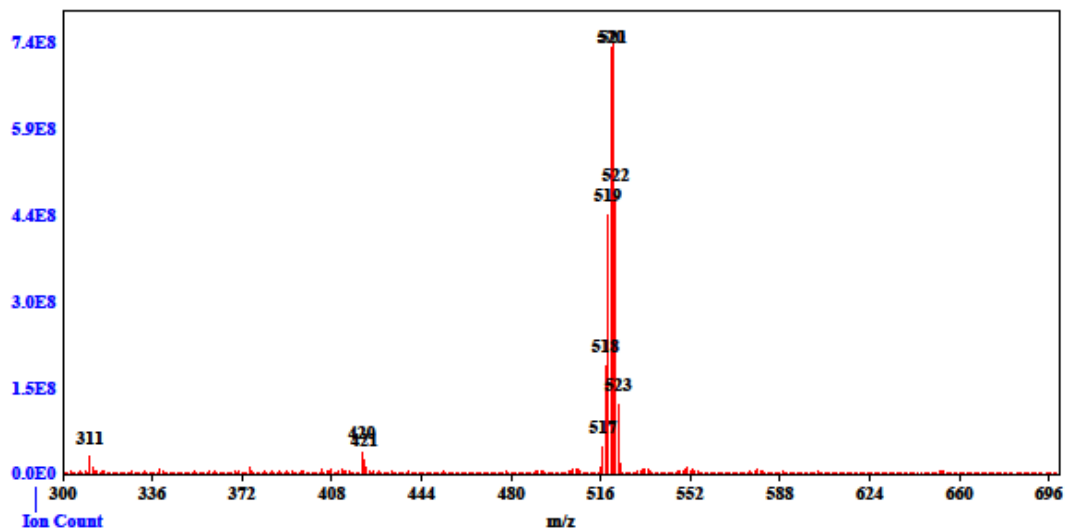

Figure S21. MS spectrum of 8.

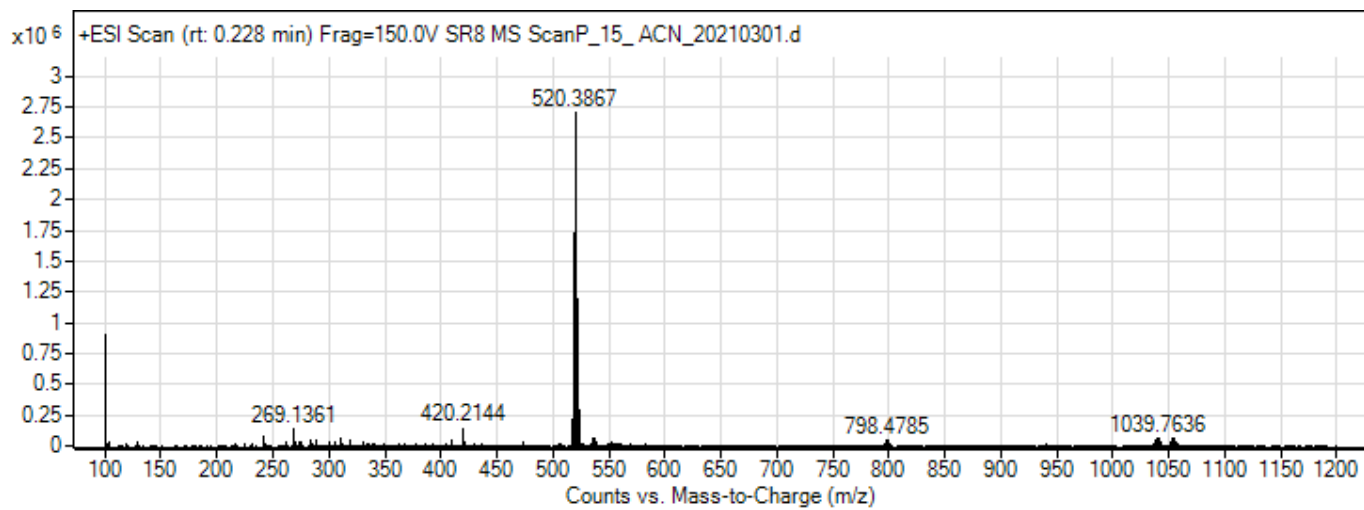

Figure S22. HRMS spectrum of 8.

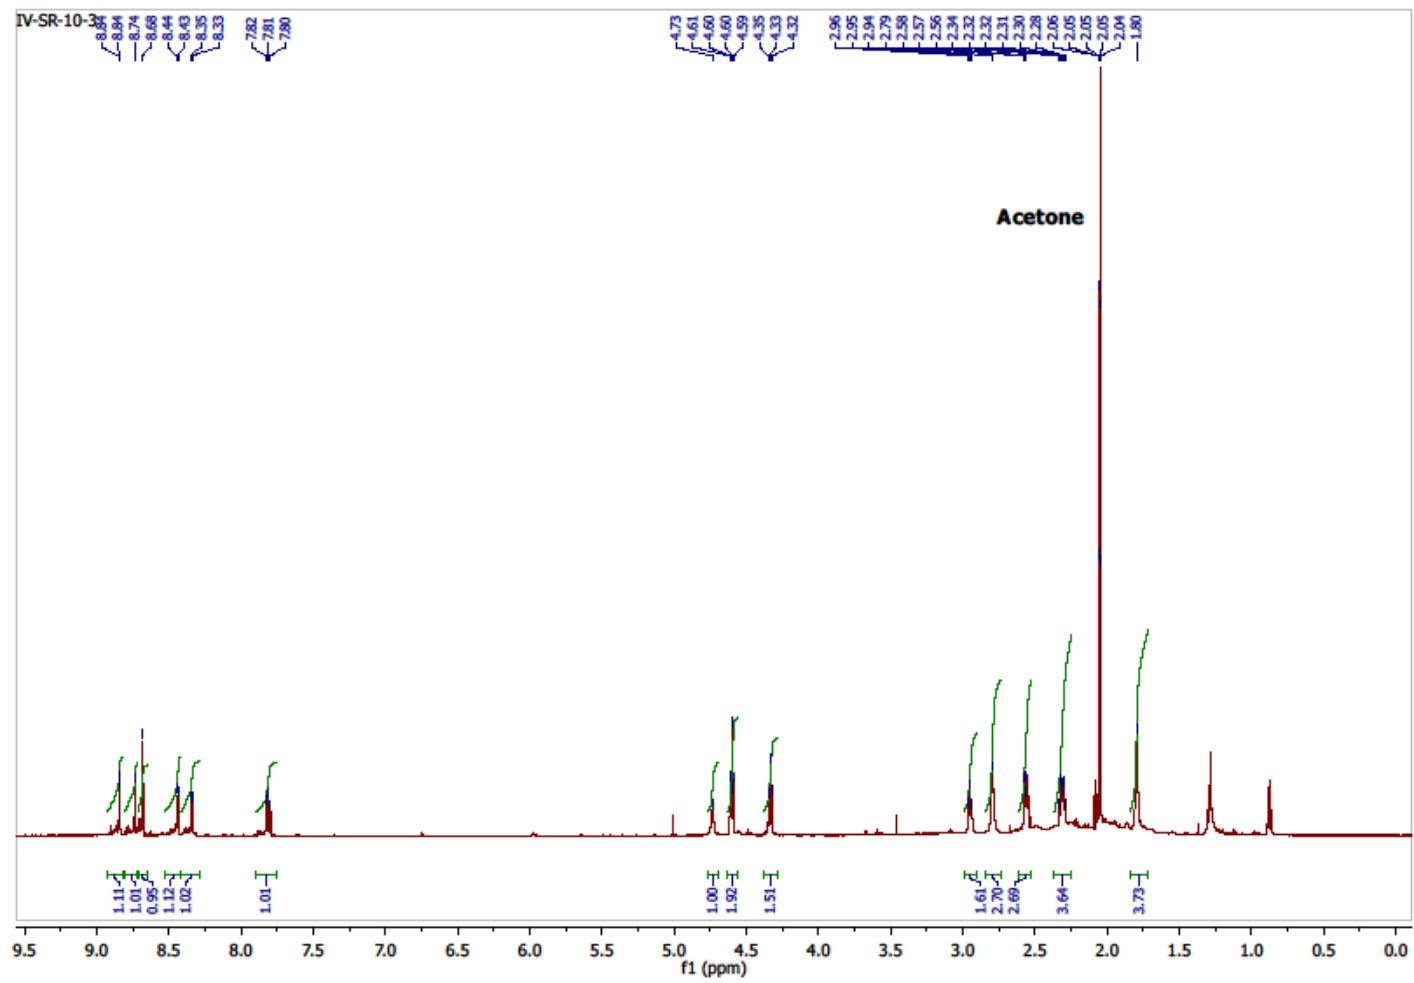

Figure S23. <sup>1</sup>H NMR spectrum of 9.

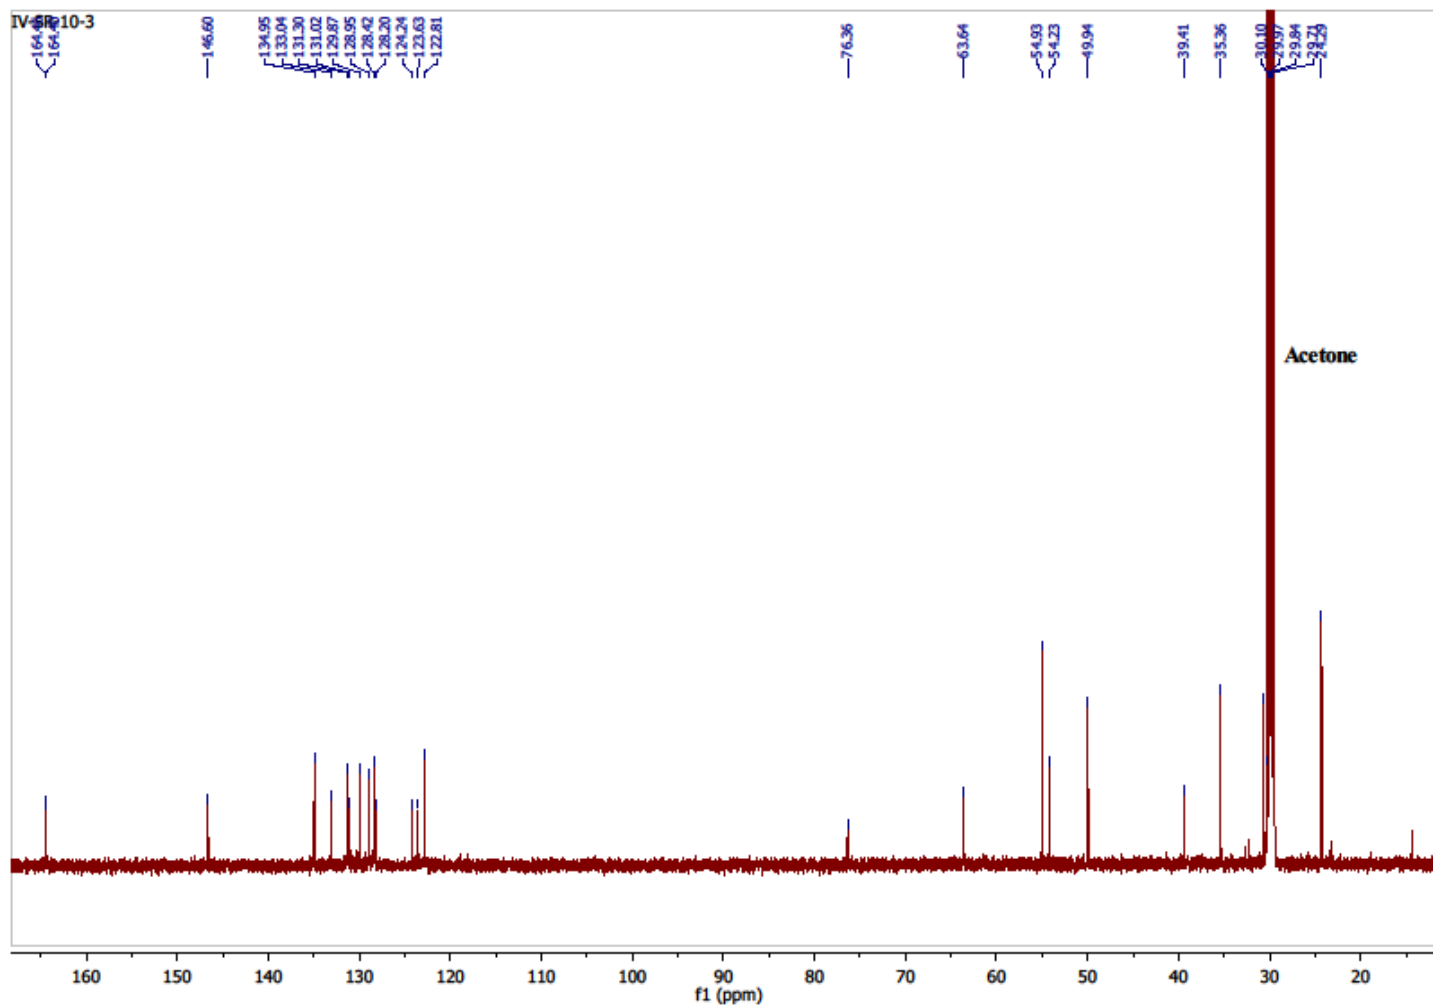

Figure S24.  $^{13}\text{C}$  NMR spectrum of **9**.

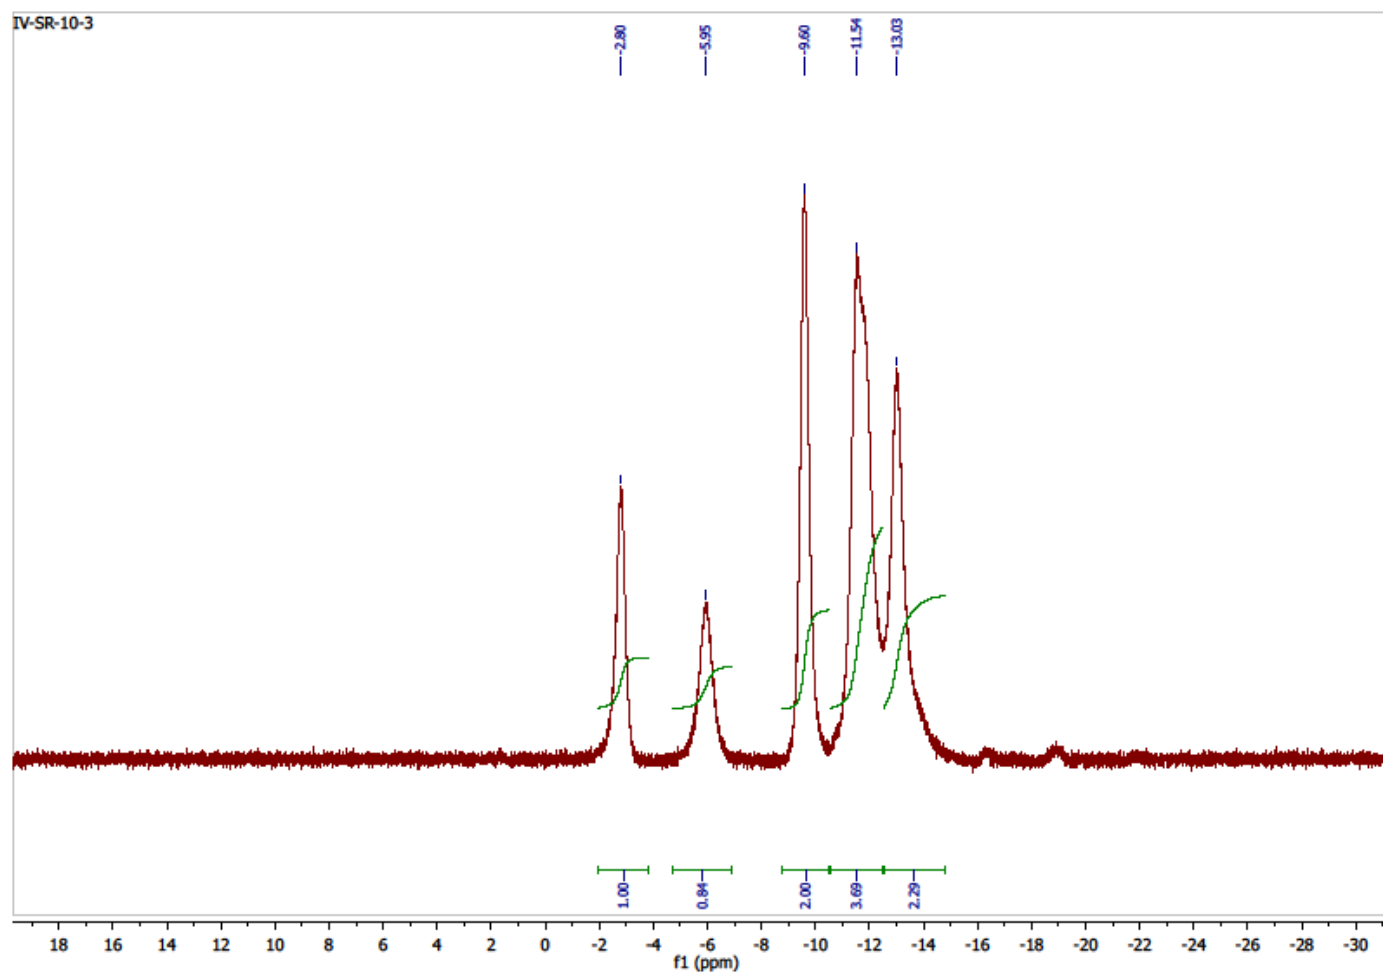

Figure S25.  $^{11}\text{B}$  NMR ( $^1\text{H}$  BB) spectrum of 9.

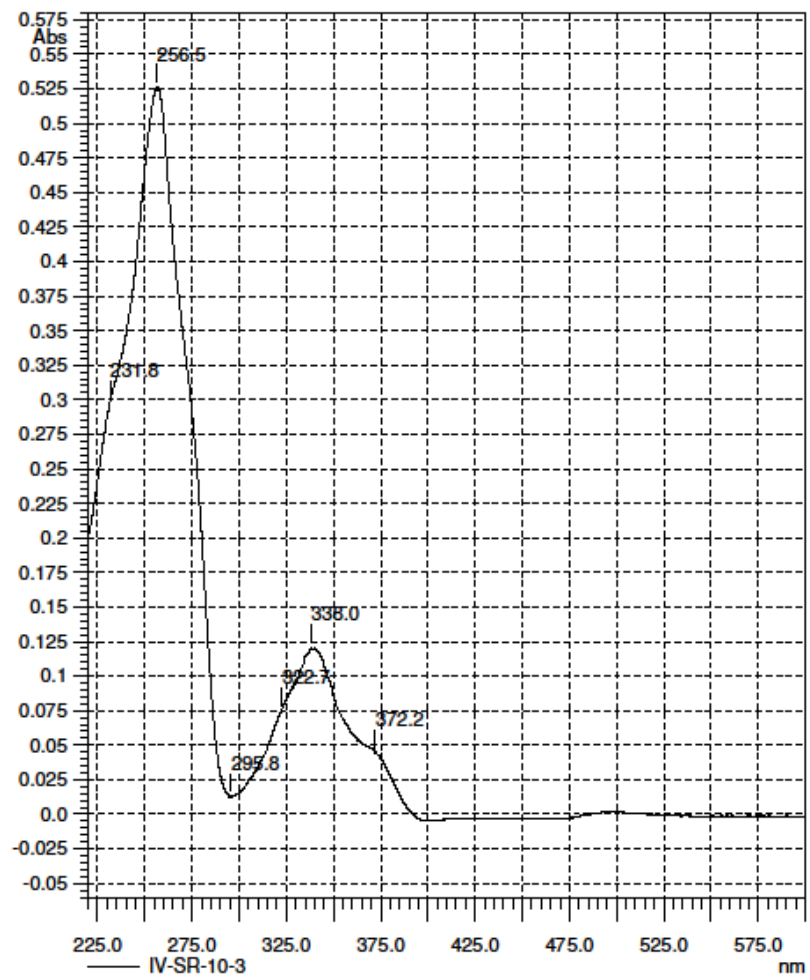

Figure S26. UV spectrum of 9.



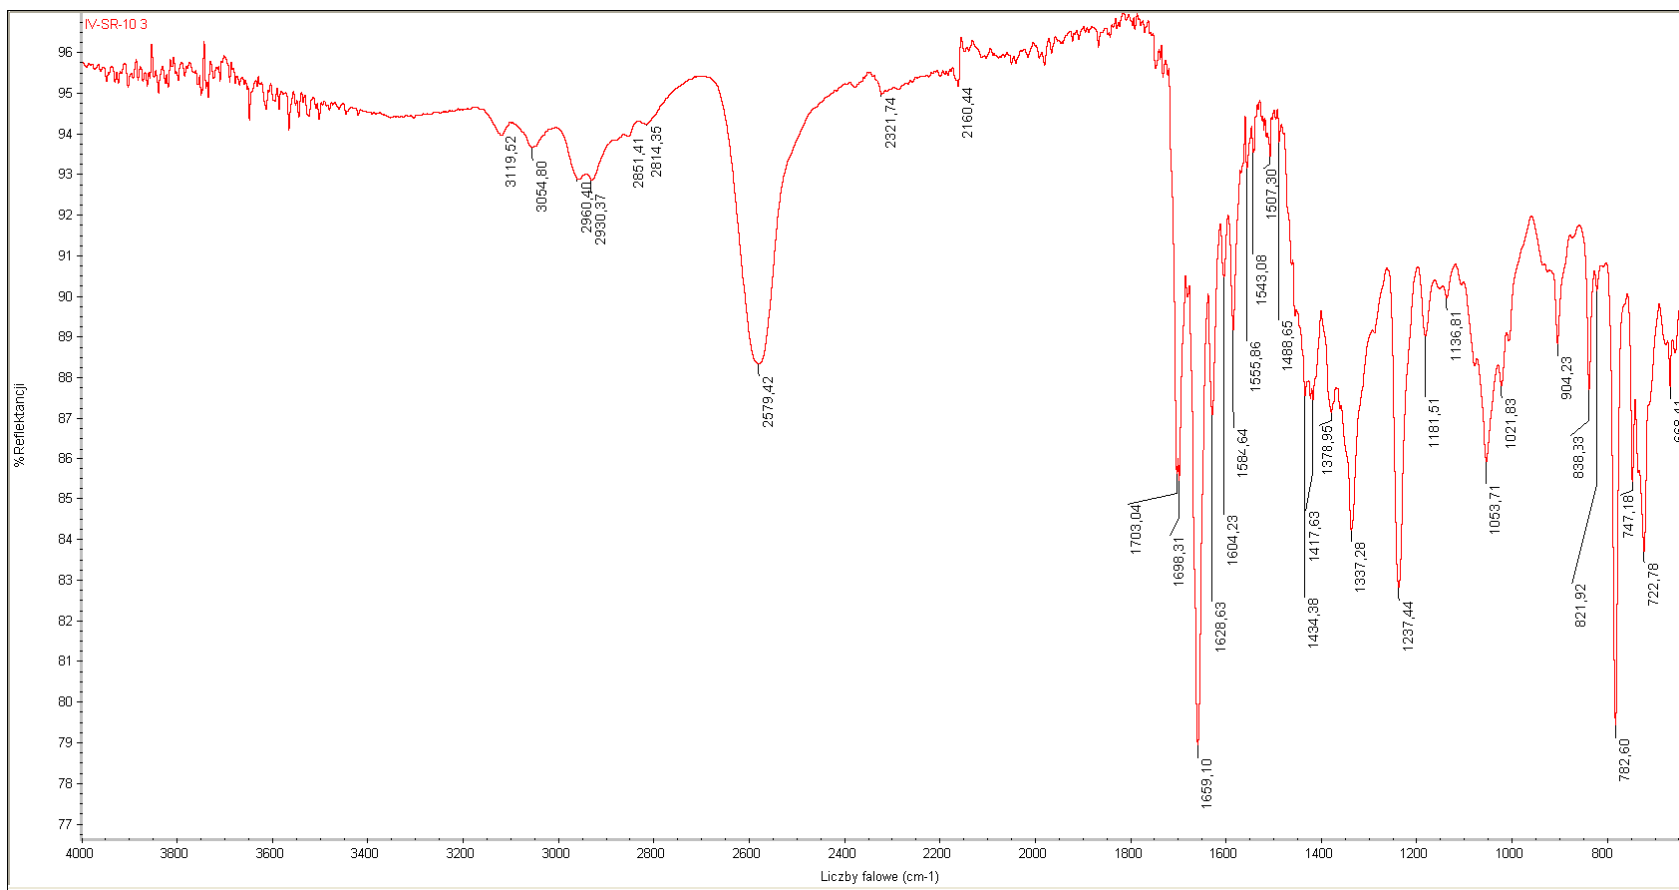

Figure S27. IR spectrum of 9.

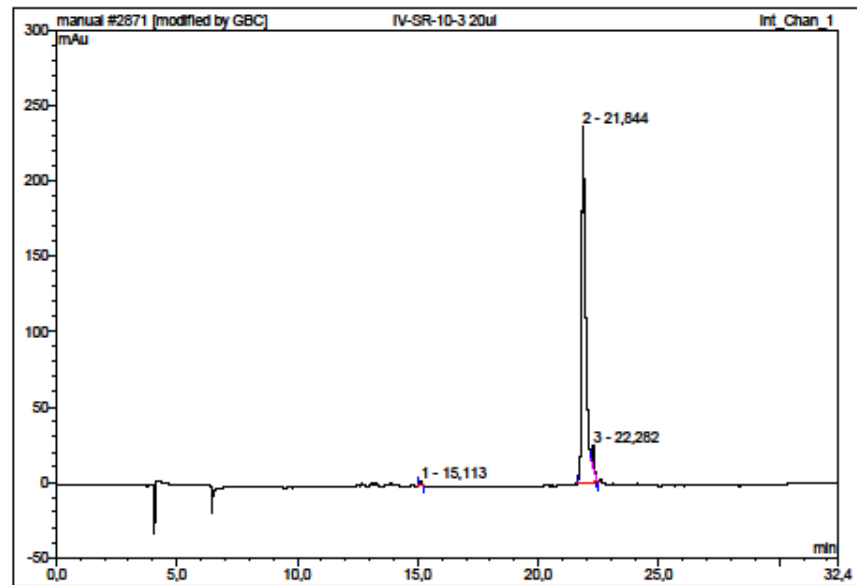

| No.           | Ret.Time<br>min | Peak Name | Height<br>mAu | Area<br>mAu*min | Rel.Area<br>% | Amount | Type |
|---------------|-----------------|-----------|---------------|-----------------|---------------|--------|------|
| 1             | 15,11           | n.a.      | 3,035         | 0,348           | 0,72          | n.a.   | BMB* |
| 2             | 21,84           | n.a.      | 236,872       | 46,733          | 96,65         | n.a.   | BMB* |
| 3             | 22,28           | n.a.      | 15,135        | 1,272           | 2,63          | n.a.   | Rd*  |
| <b>Total:</b> |                 |           | 255,042       | 48,353          | 100,00        | 0,000  |      |

Figure S28. HPLC analysis of 9.

Spectrum Name: IV-SR-10\_3\_PT  
Start Ion: 300  
End Ion: 700  
Source: APCI + 10.0μA 400C  
Capillary: 150V 300C Offset: 25V Span: 0V

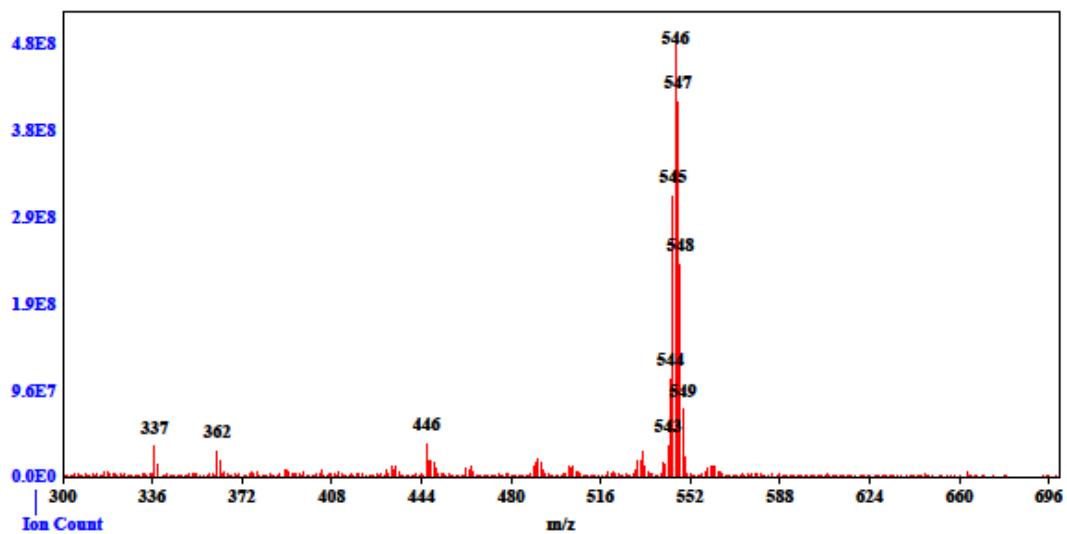

Figure S29. MS spectrum of 9.

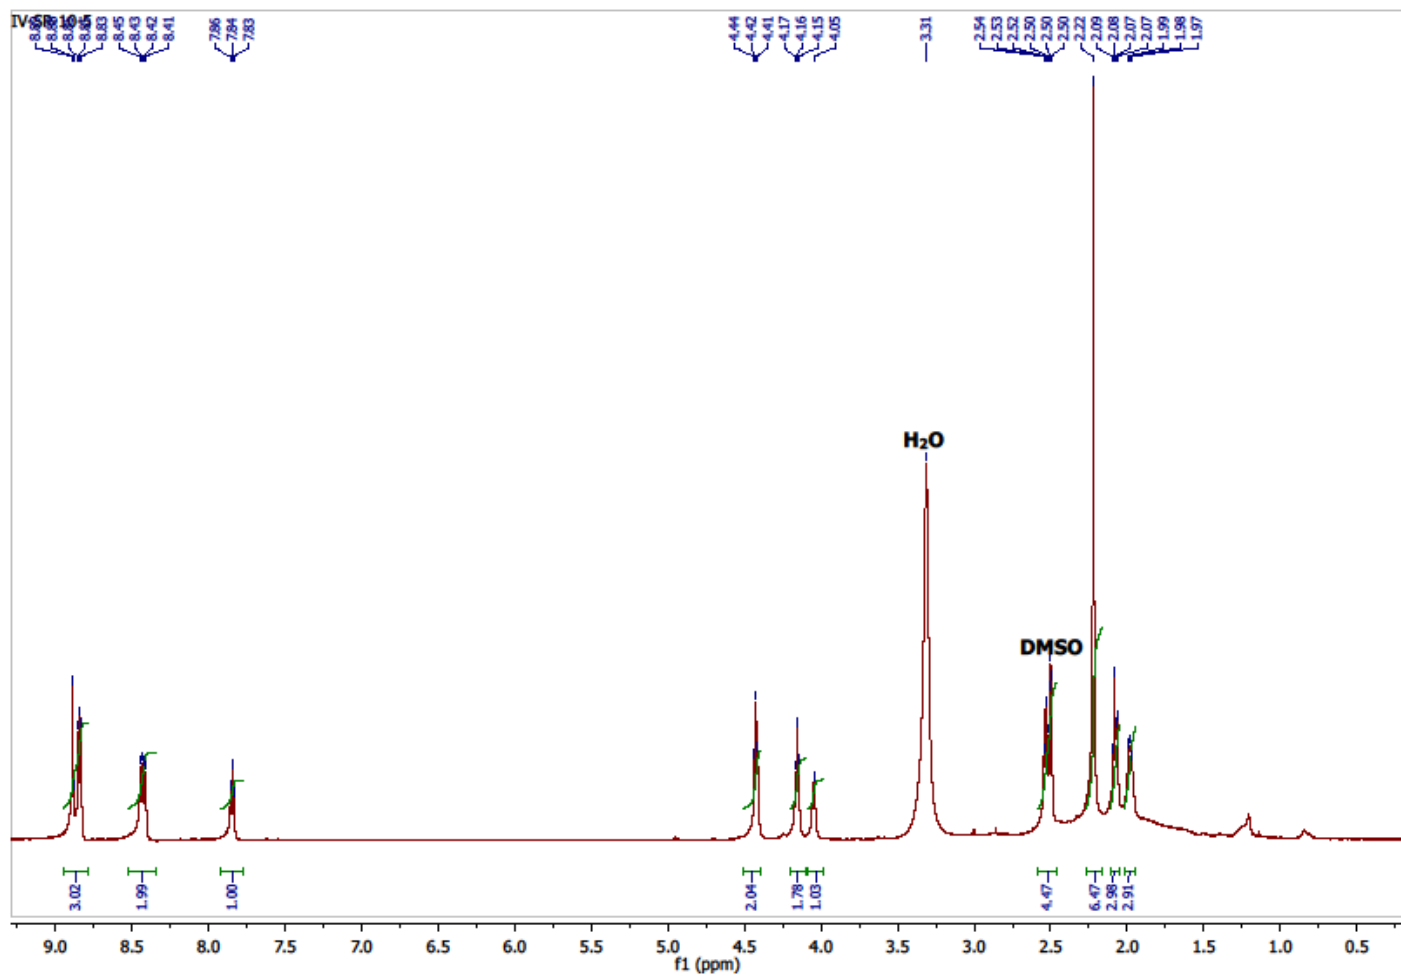

Figure S30. <sup>1</sup>H NMR spectrum of 10.

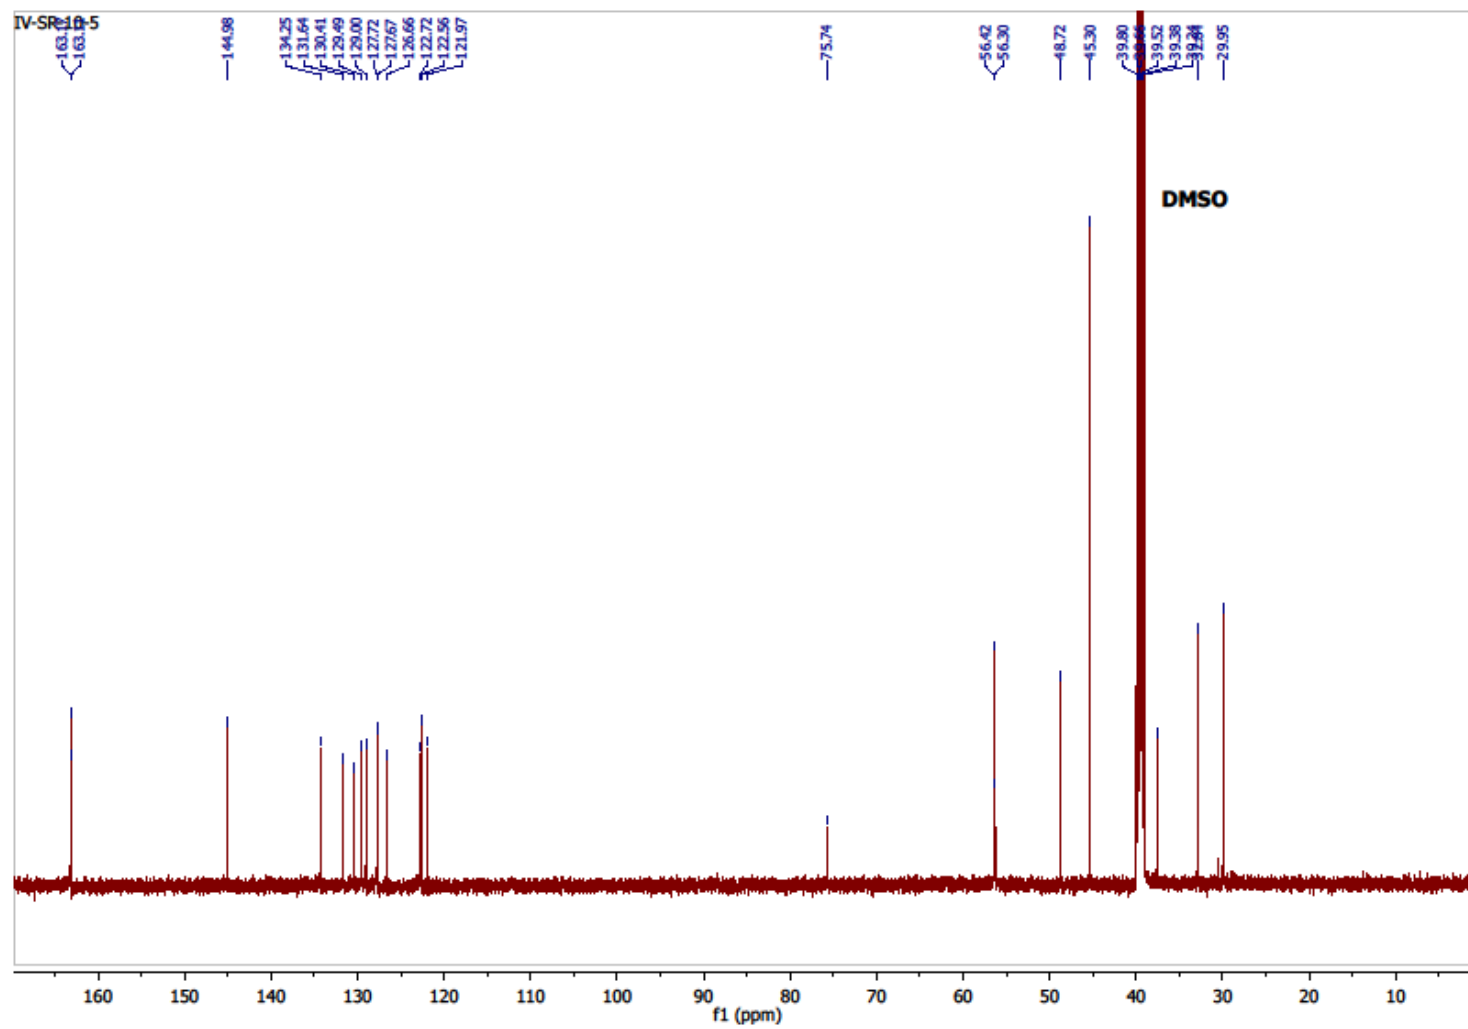

Figure S31.  $^{13}\text{C}$  NMR spectrum of 10.

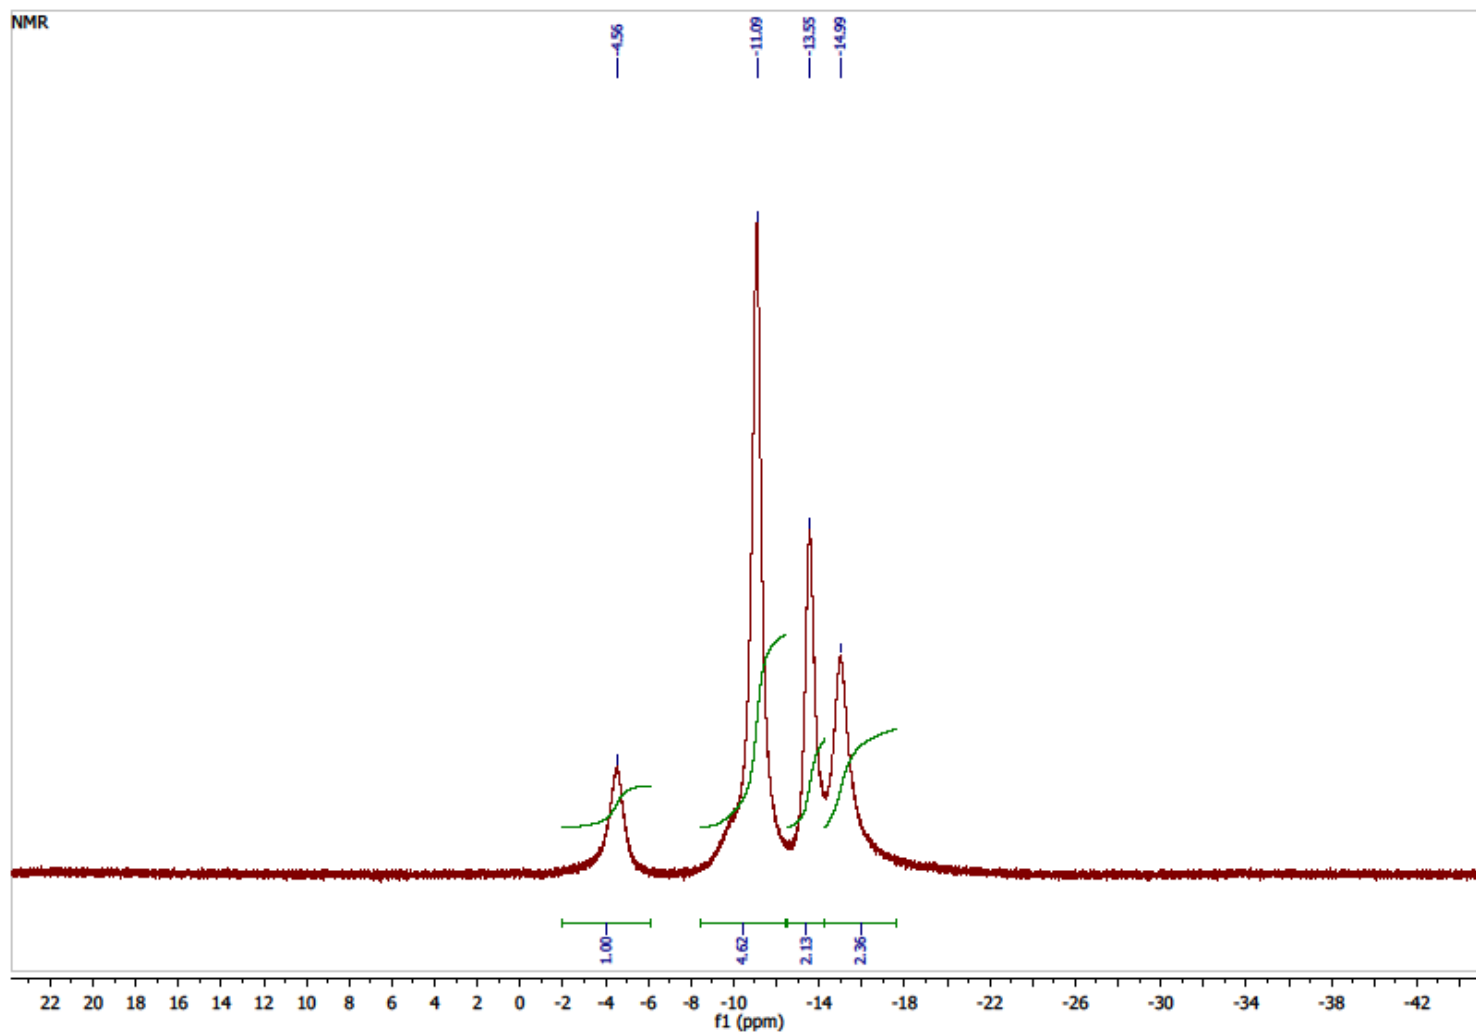

Figure S32.  $^{11}\text{B}$  NMR  $\{^1\text{H BB}\}$  spectrum of 10.

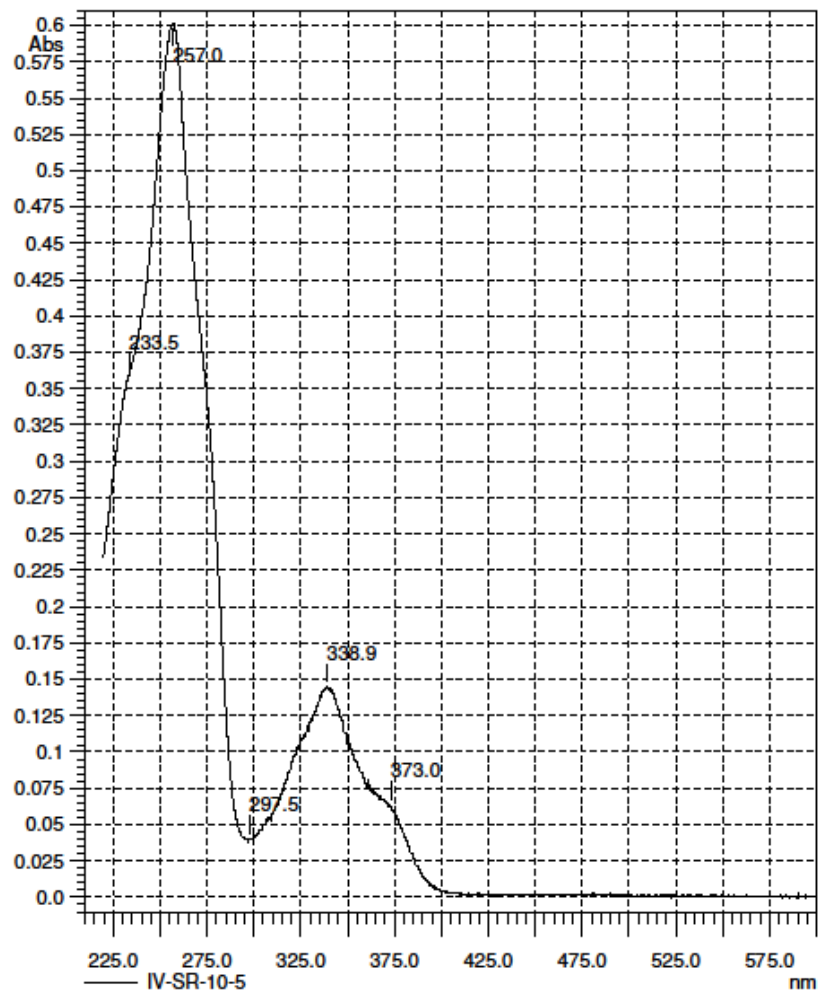

Figure S33. UV spectrum of 10.

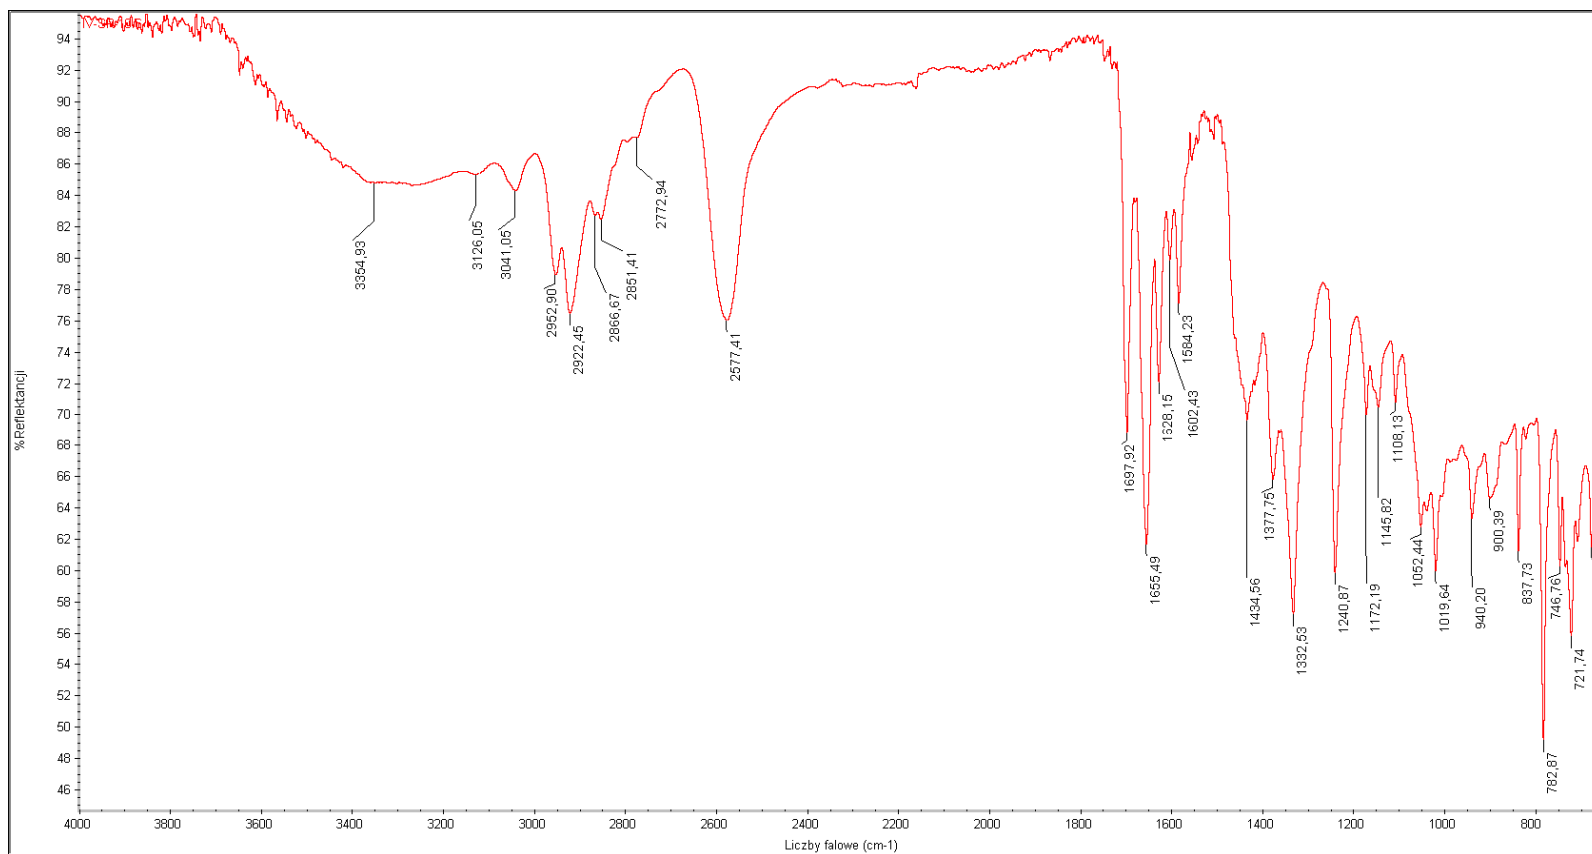

Figure S34. IR spectrum of 10.



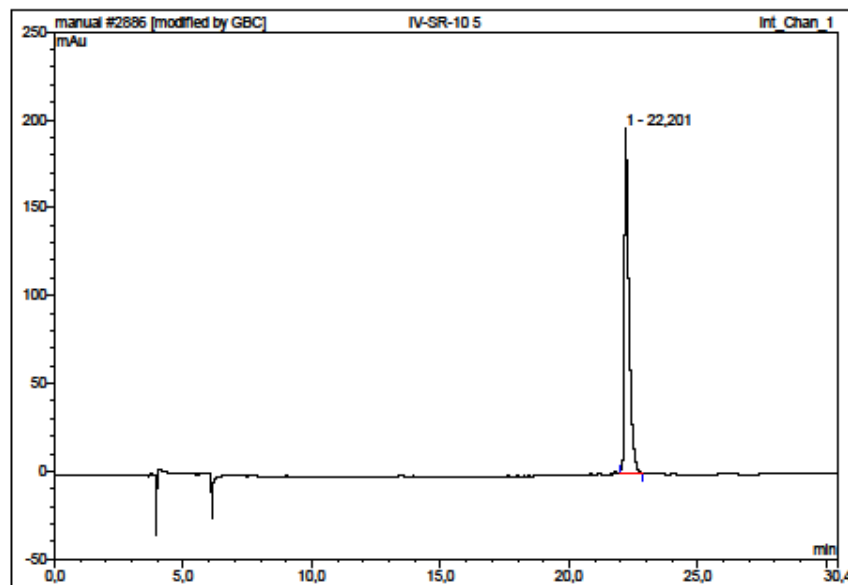

| No.           | Ret.Time<br>min | Peak Name | Height<br>mAu | Area<br>mAu*min | Rel.Area<br>% | Amount | Type |
|---------------|-----------------|-----------|---------------|-----------------|---------------|--------|------|
| 1             | 22,20           | n.a.      | 196,209       | 39,594          | 100,00        | n.a.   | BMB  |
| <b>Total:</b> |                 |           | 196,209       | 39,594          | 100,00        | 0,000  |      |

Figure S35. HPLC analysis of 10.

Spectrum Name: IV-SR-10\_5\_PT  
Start Ion: 300  
End Ion: 700  
Source: APCI + 10.0µA 400C  
Capillary: 150V 300C Offset: 25V Span: 0V

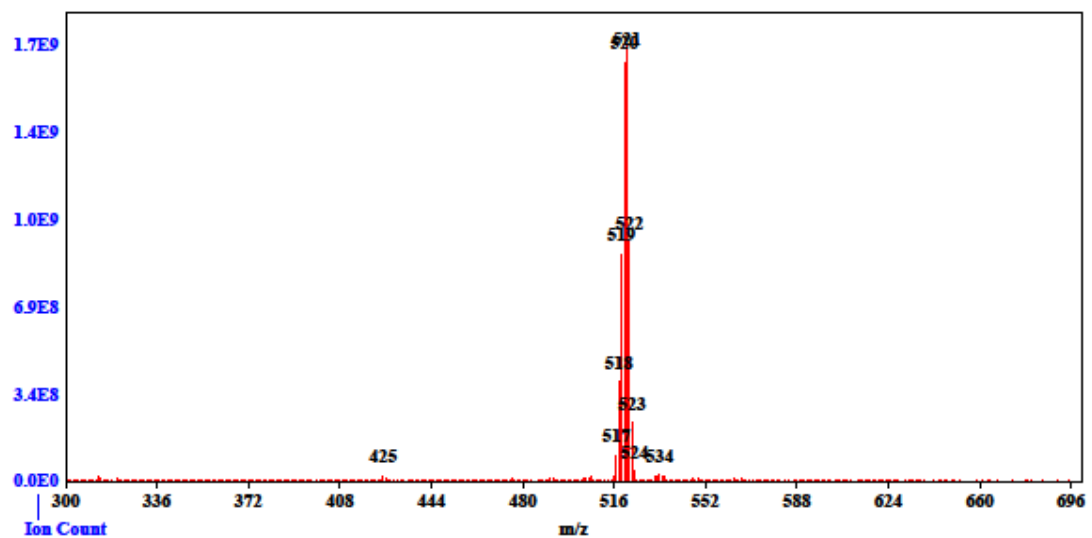

Figure S36. MS spectrum of 10.

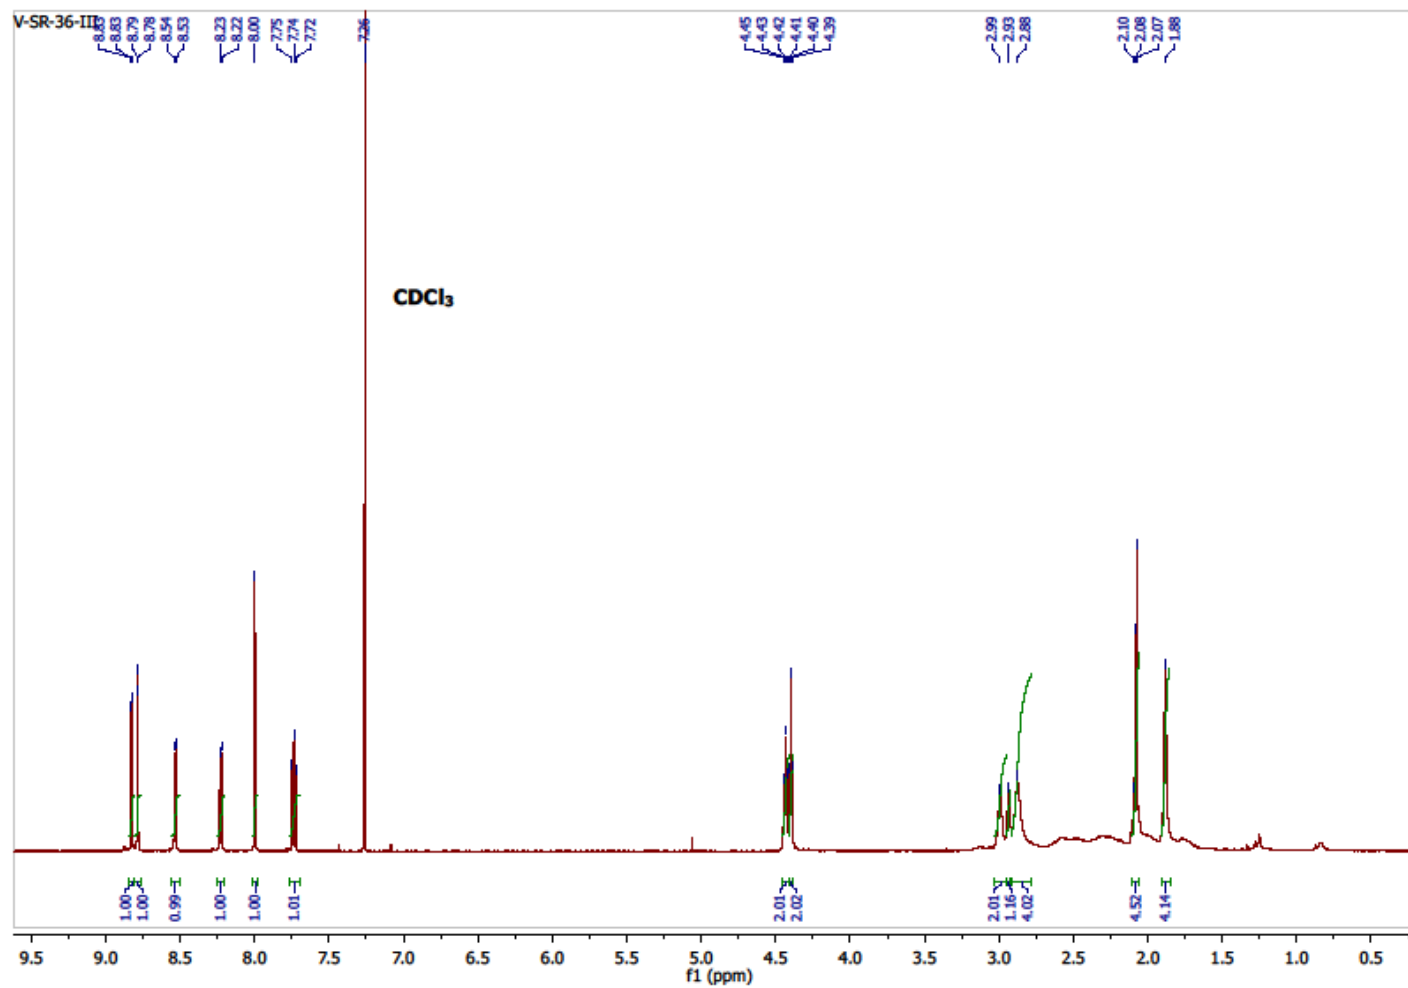

Figure S37. <sup>1</sup>H NMR spectrum of 11.

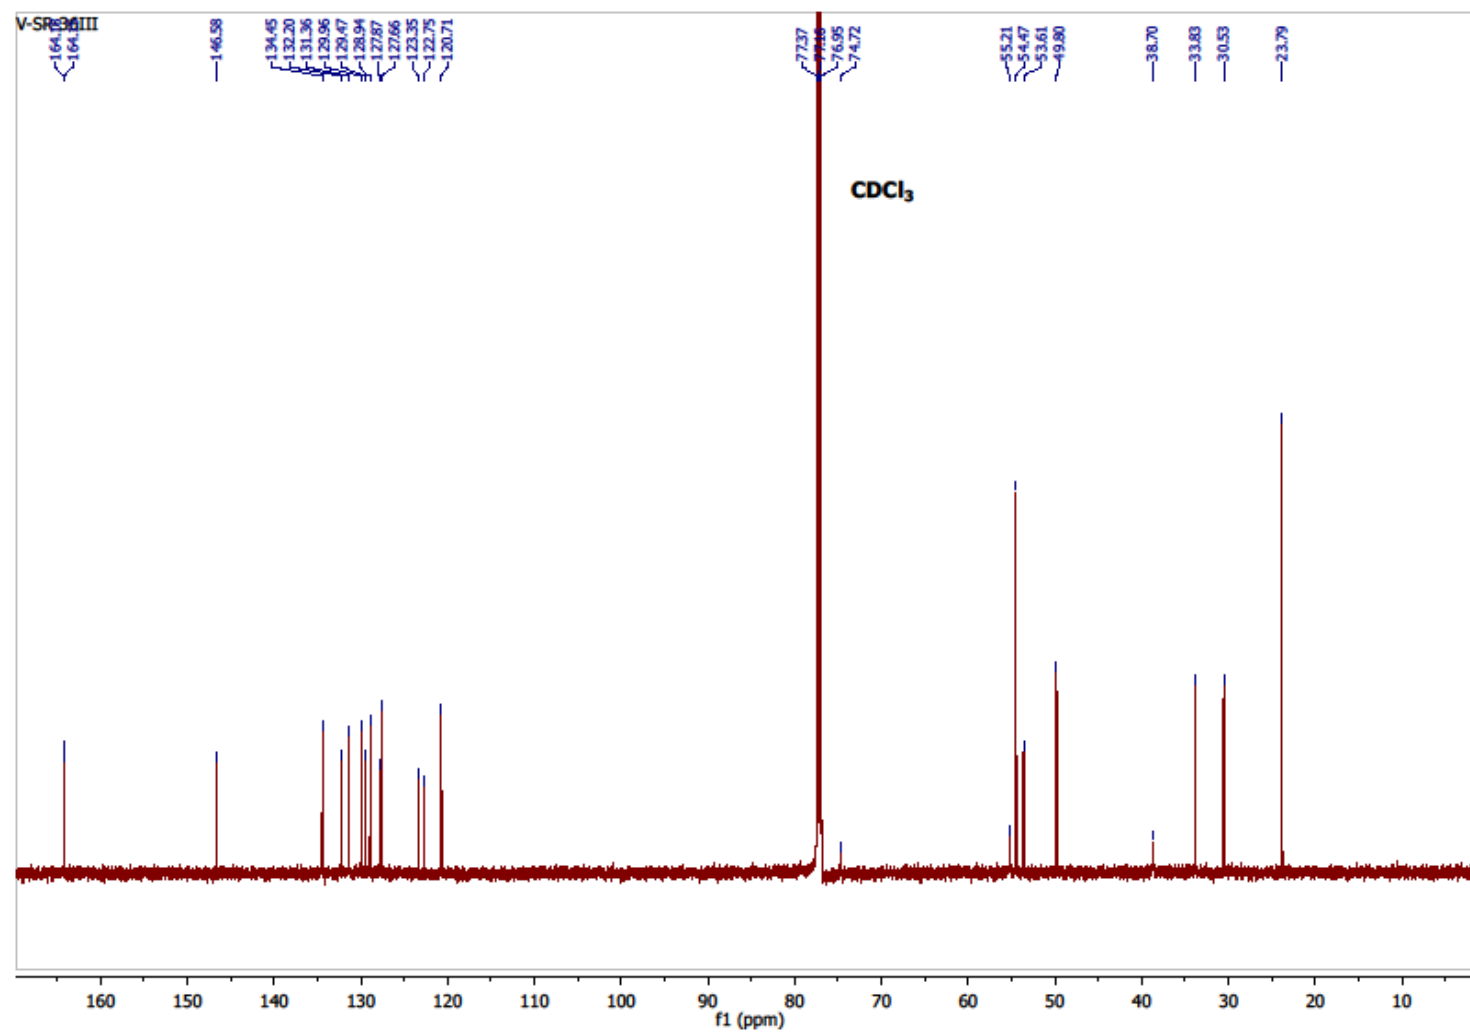

Figure S38. <sup>13</sup>C NMR spectrum of 11.

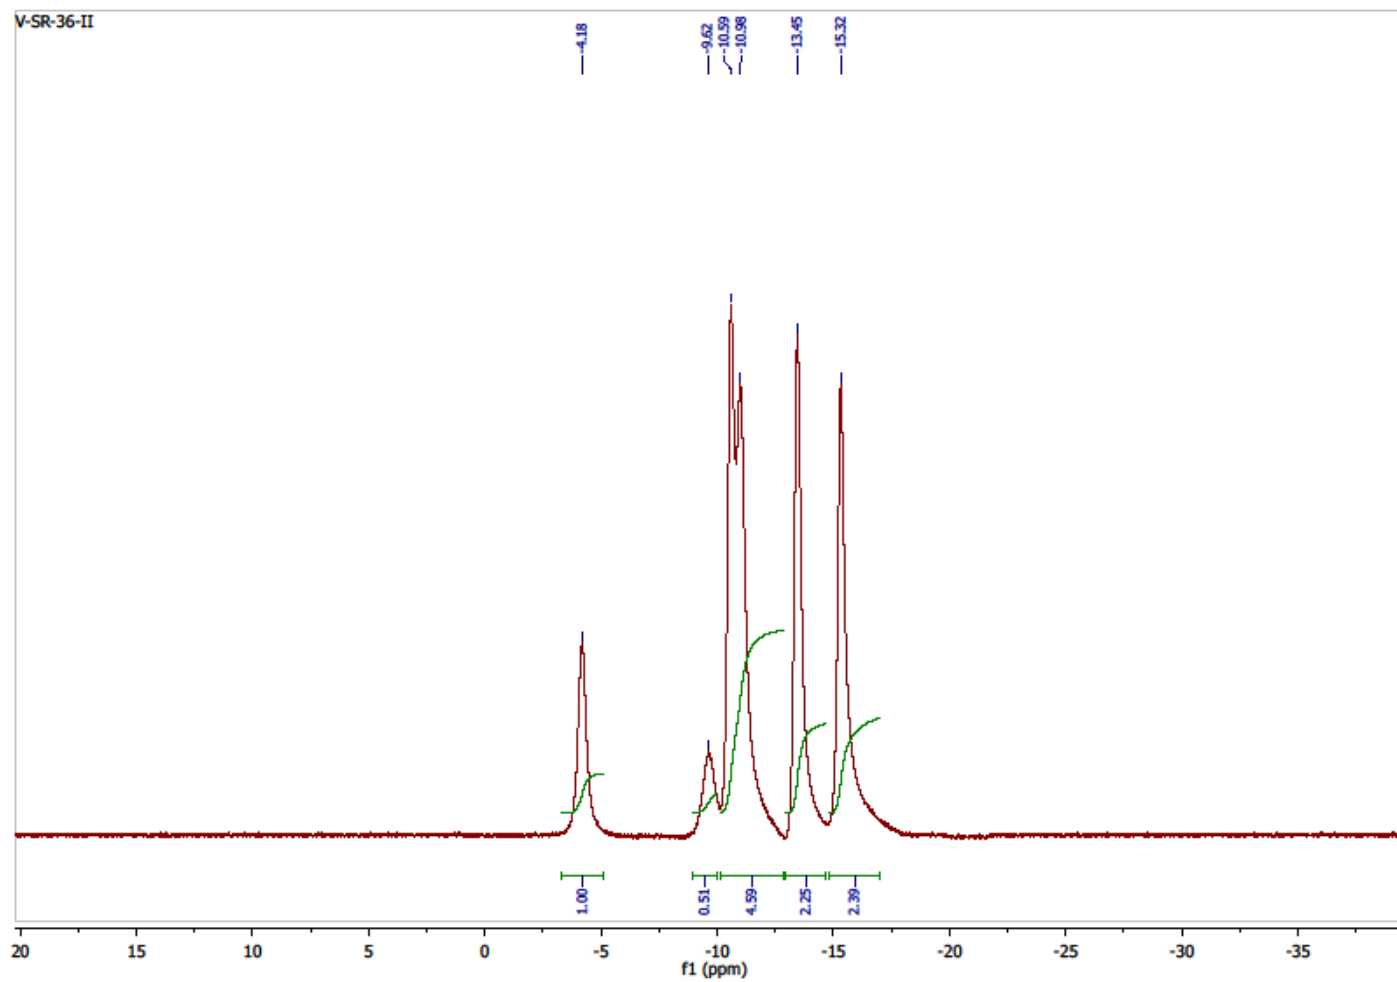

Figure S39.  $^{11}\text{B}$  NMR  $\{^1\text{H BB}\}$  spectrum of 11.

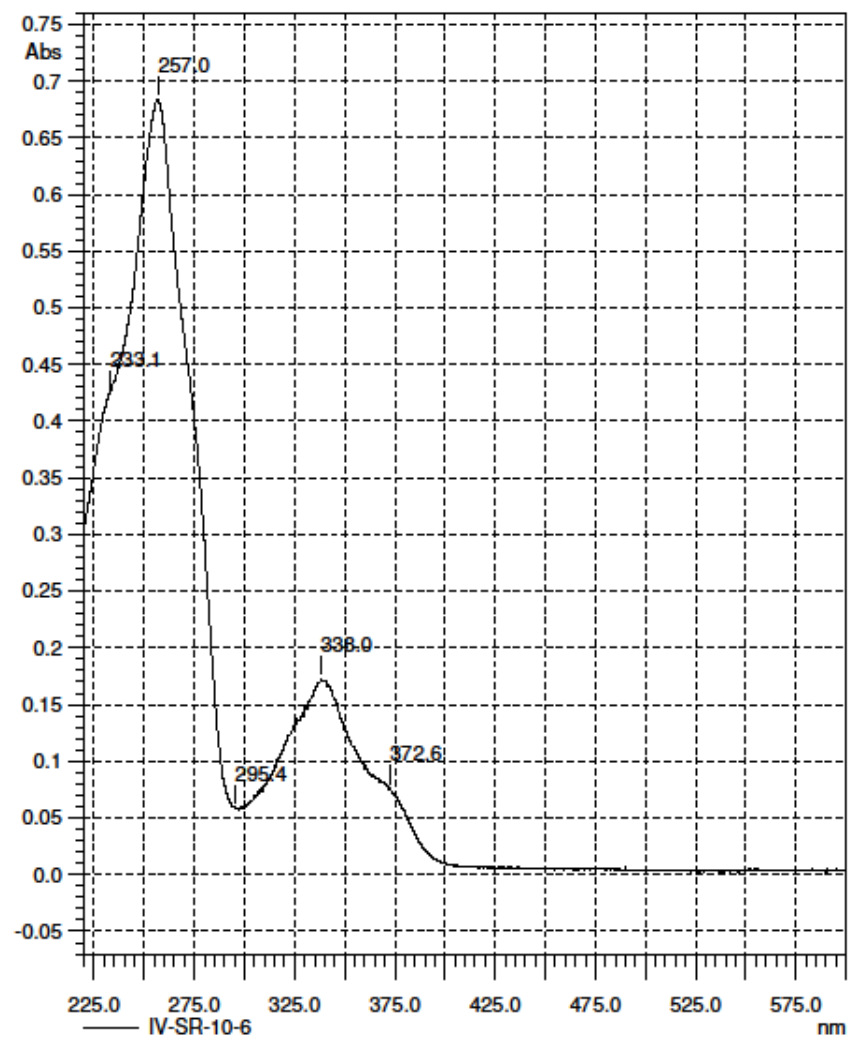

Figure S40. UV spectrum of 11.

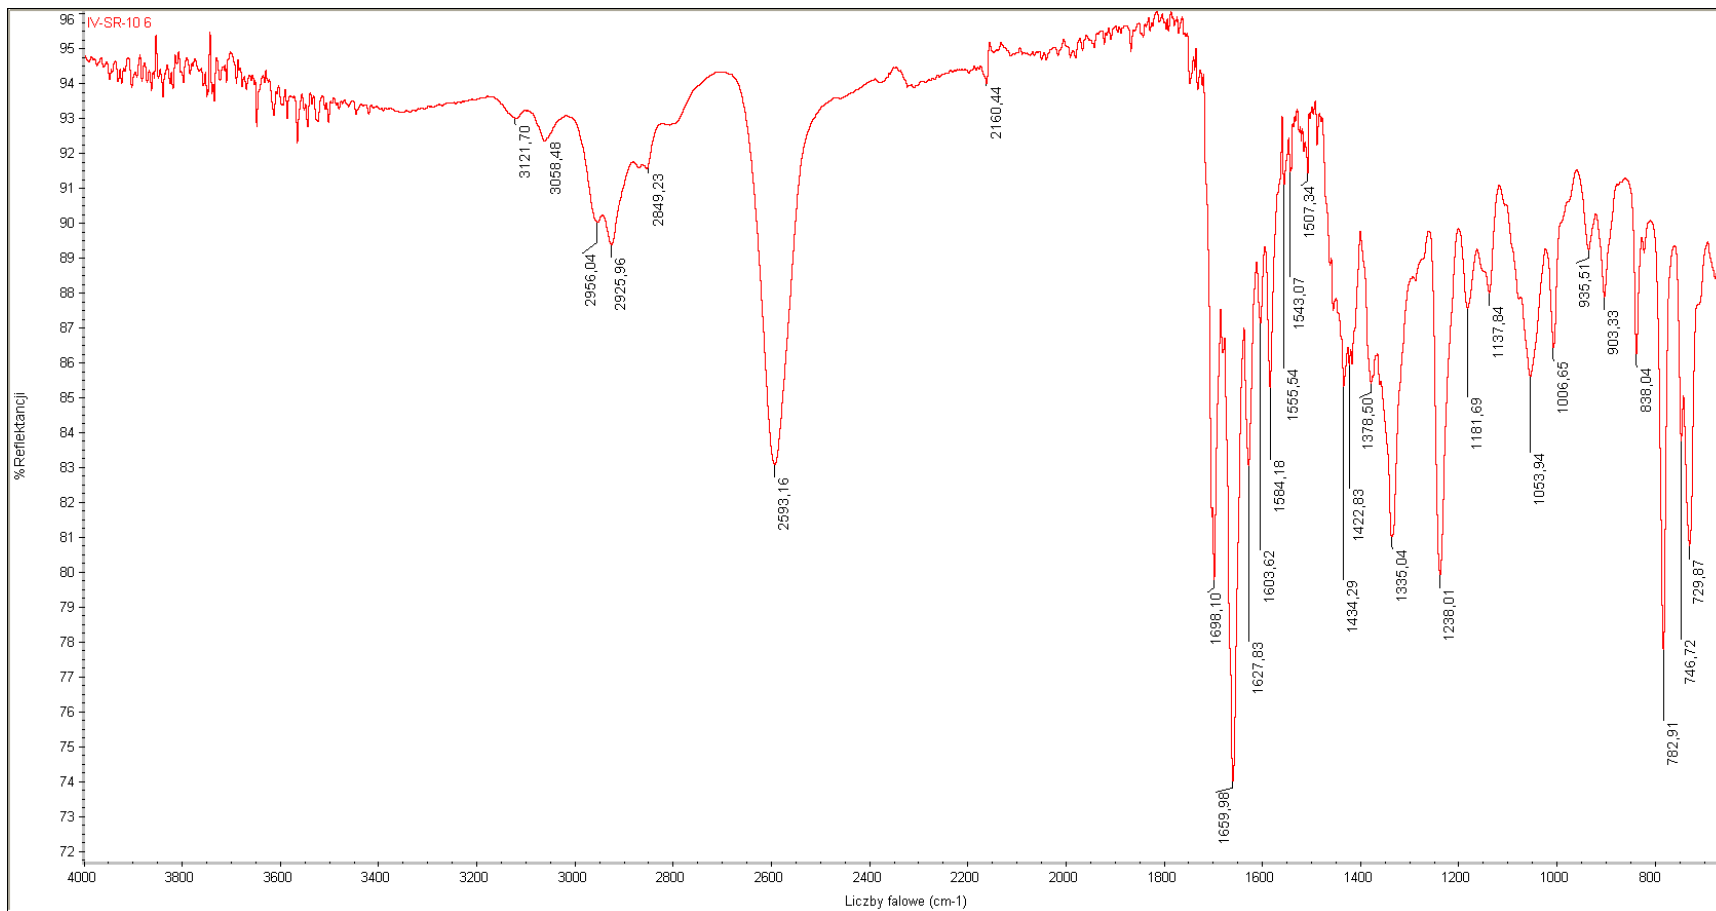

Figure S41. IR spectrum of 11.

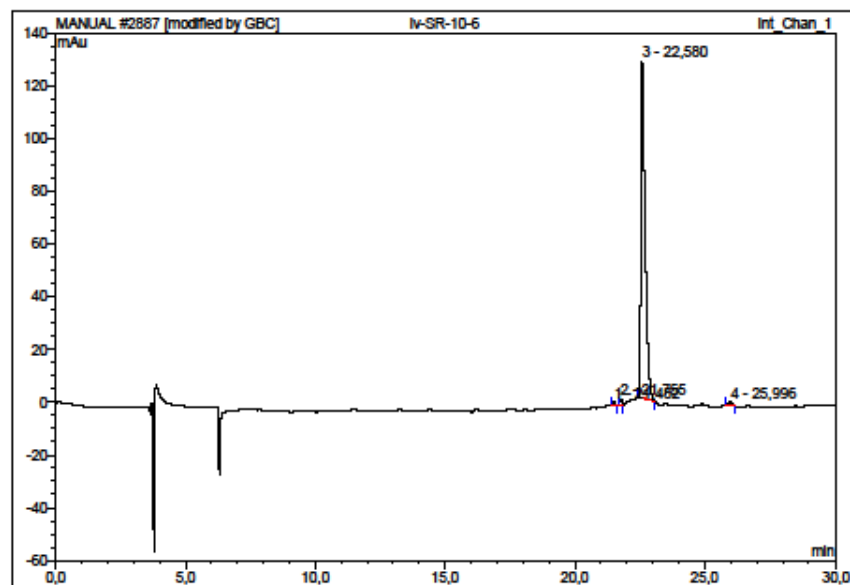

| No.           | Ret. Time<br>min | Peak Name | Height<br>mAu | Area<br>mAu*min | Rel. Area<br>% | Amount | Type |
|---------------|------------------|-----------|---------------|-----------------|----------------|--------|------|
| 1             | 21,48            | n.a.      | 0,983         | 0,114           | 0,46           | n.a.   | BMB* |
| 2             | 21,76            | n.a.      | 2,363         | 0,226           | 0,91           | n.a.   | BMB* |
| 3             | 22,58            | n.a.      | 127,847       | 24,210          | 97,63          | n.a.   | BMB* |
| 4             | 26,00            | n.a.      | 1,303         | 0,248           | 1,00           | n.a.   | BMB* |
| <b>Total:</b> |                  |           | 132,495       | 24,798          | 100,00         | 0,000  |      |

Figure S42. HPLC analysis of 11.



Spectrum Name: IV-SR-10\_6\_PT  
Start Ion: 450  
End Ion: 600  
Source: APCI + 10.0µA 400C  
Capillary: 150V 300C Offset: 25V Span: 0V

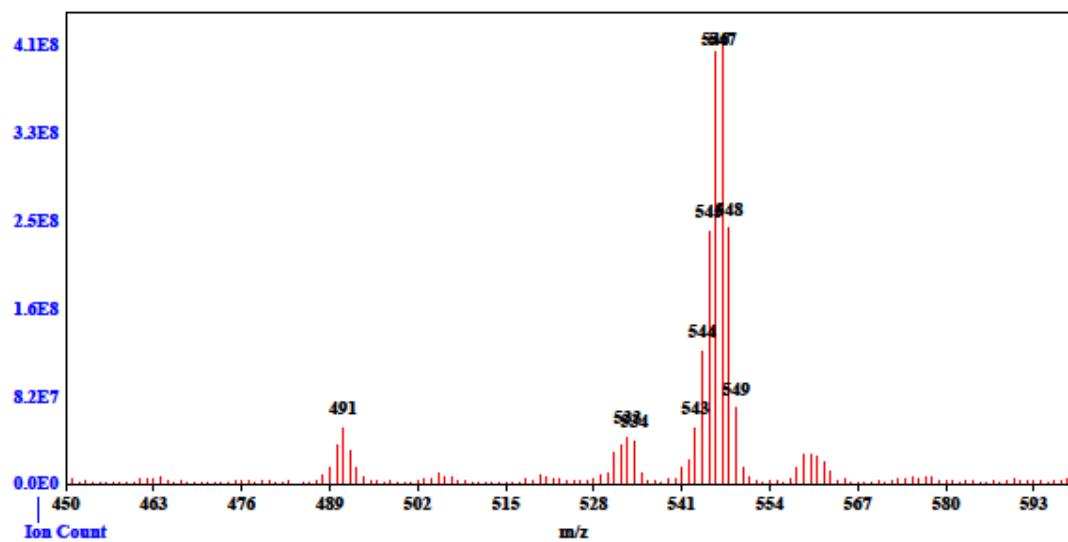

Figure S43. MS spectrum of 11.

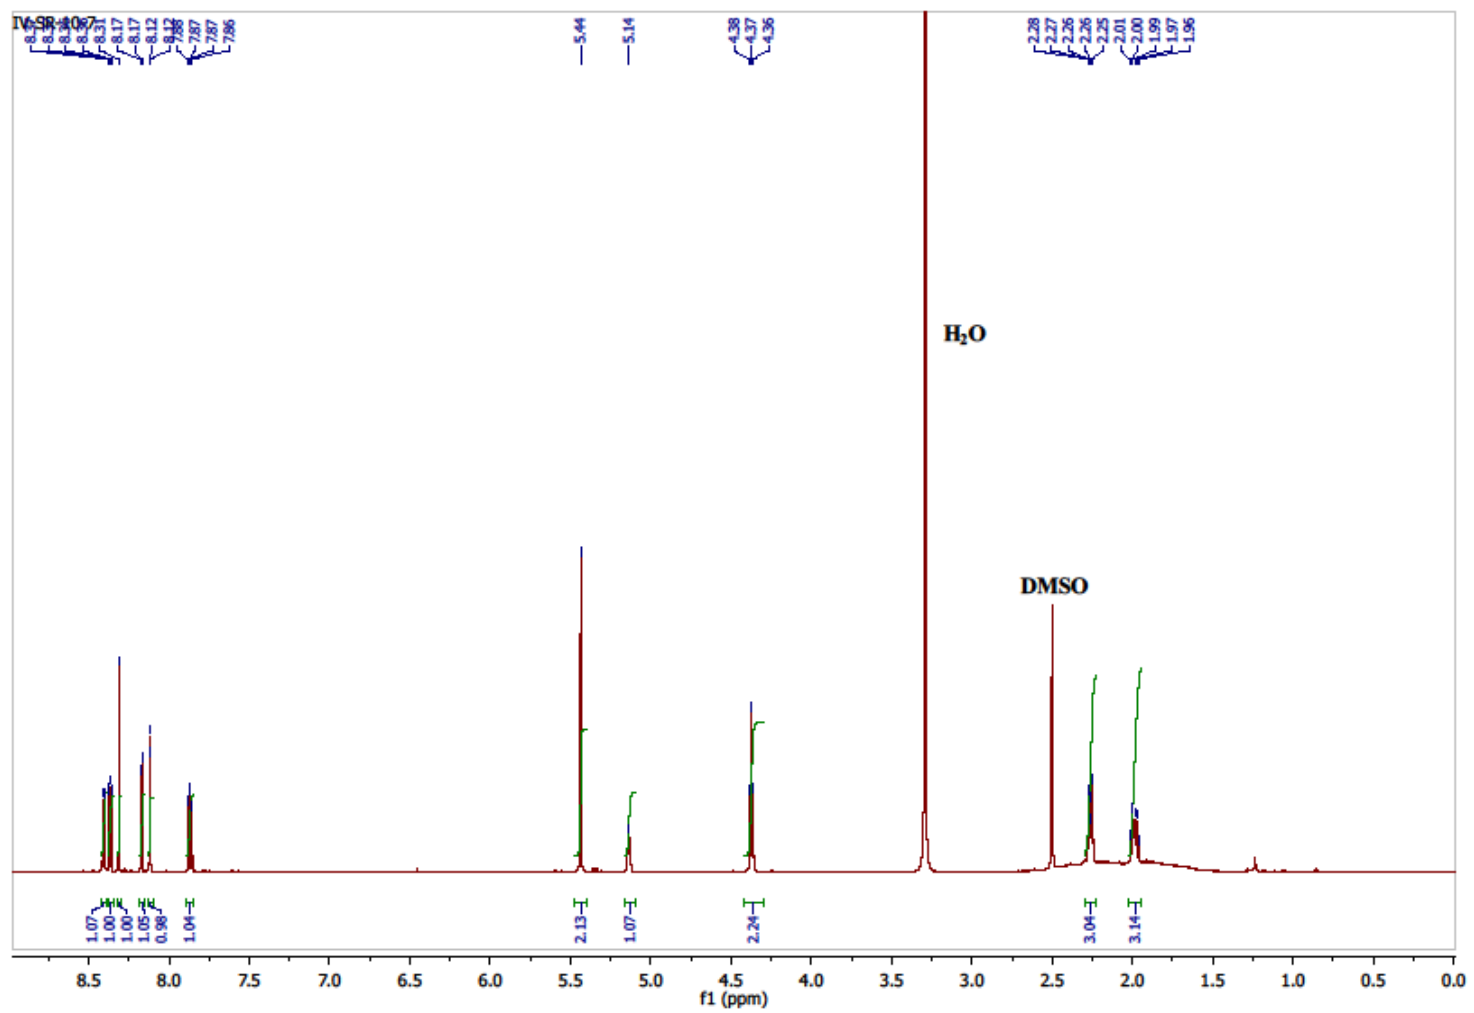

Figure S44. <sup>1</sup>H NMR spectrum of 15.

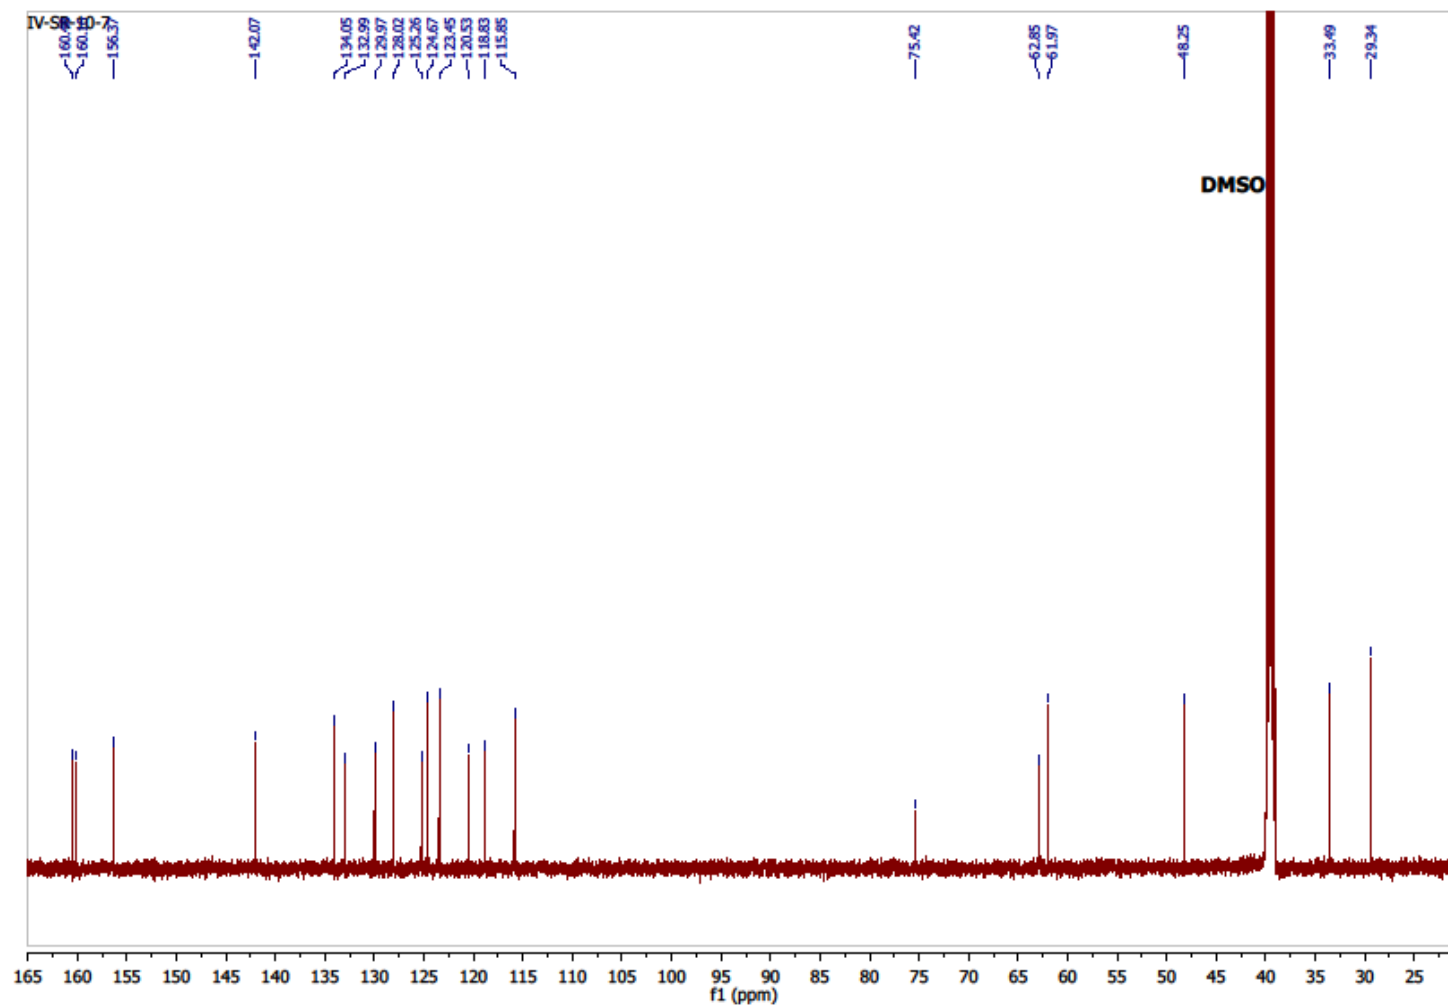

Figure S45.  $^{13}\text{C}$  NMR spectrum of 15.

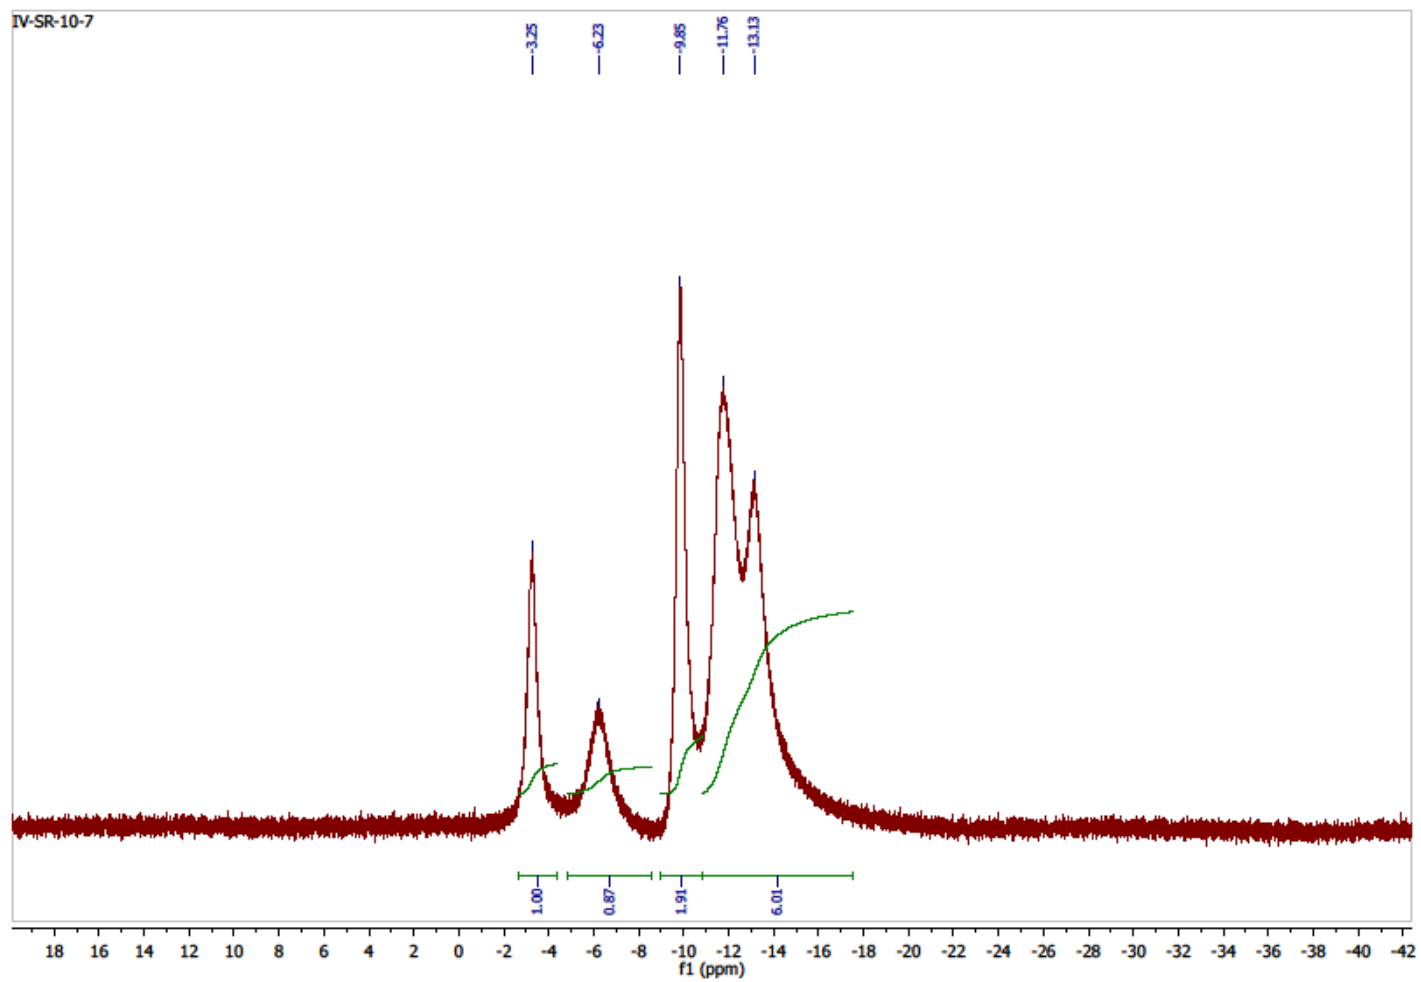

Figure S46.  $^{11}\text{B}$  NMR  $\{^1\text{H BB}\}$  spectrum of 15.

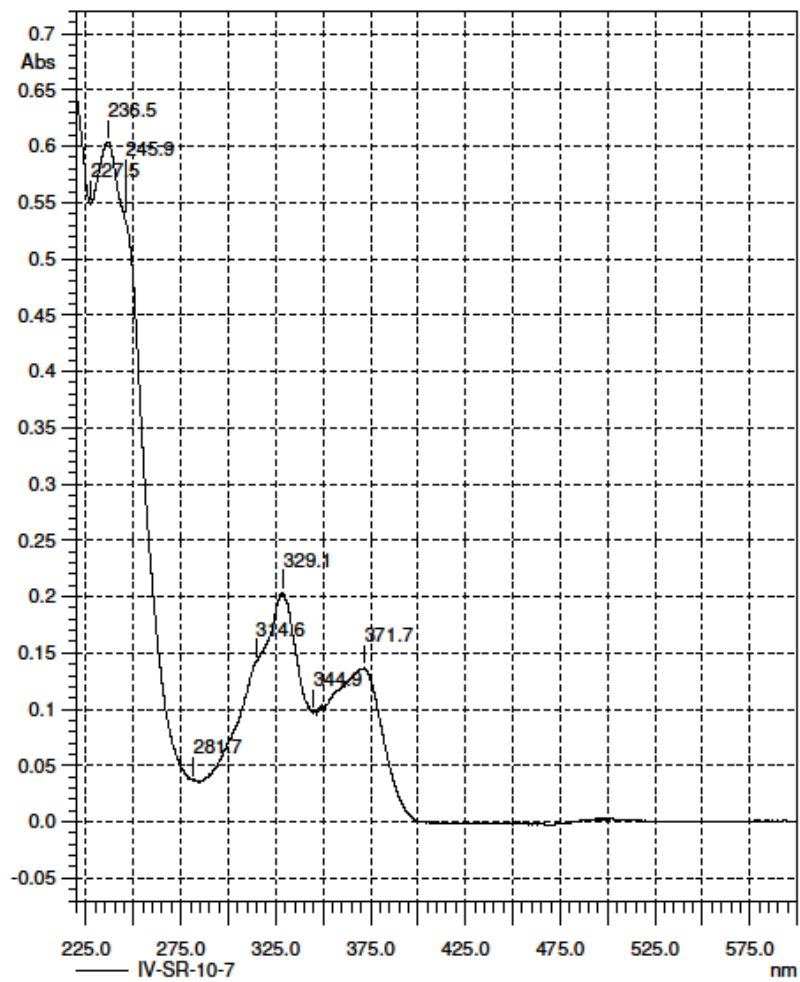

Figure S47. UV spectrum of 15.

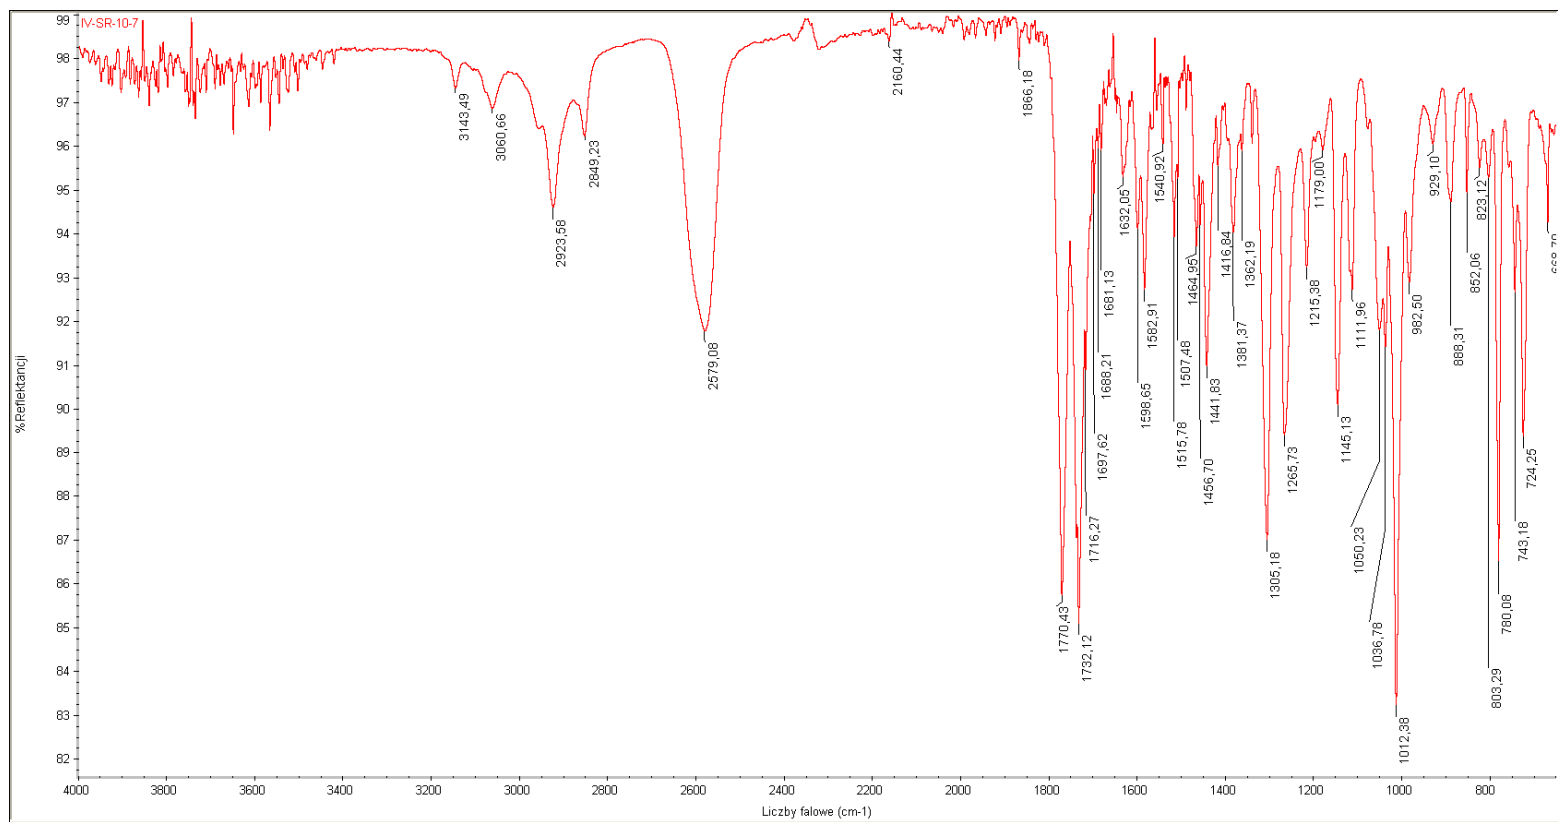

Figure S48. IR spectrum of 15.

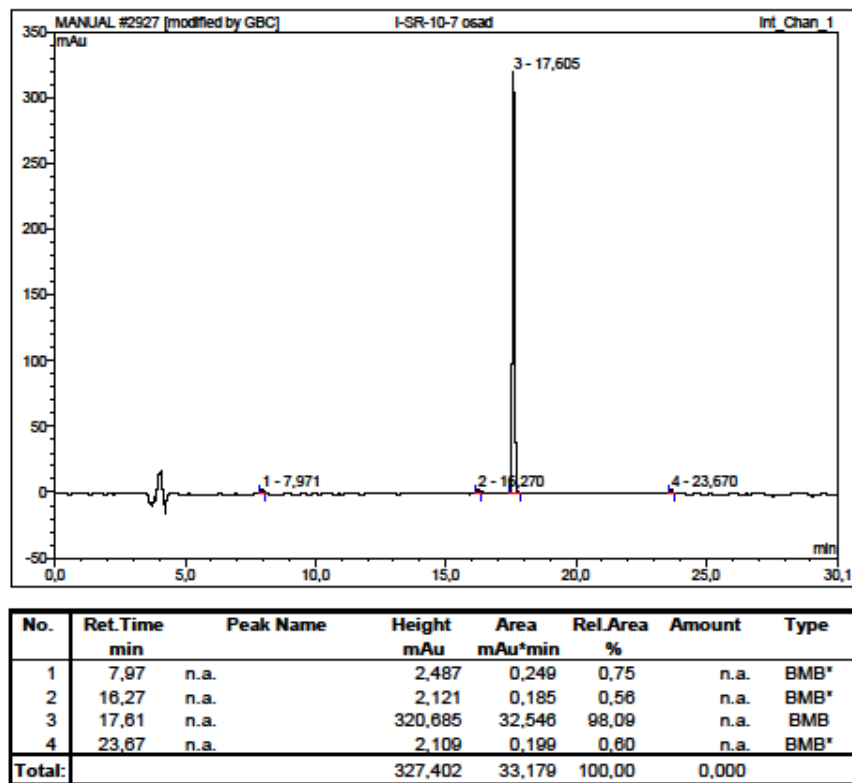

Figure S49. HPLC analysis of 15.

Spectrum Name: IV-SR-10\_7  
Start Ion: 400  
End Ion: 600  
Source: APCI + 10.0µA 400C  
Capillary: 150V 300C Offset: 25V Span: 0V

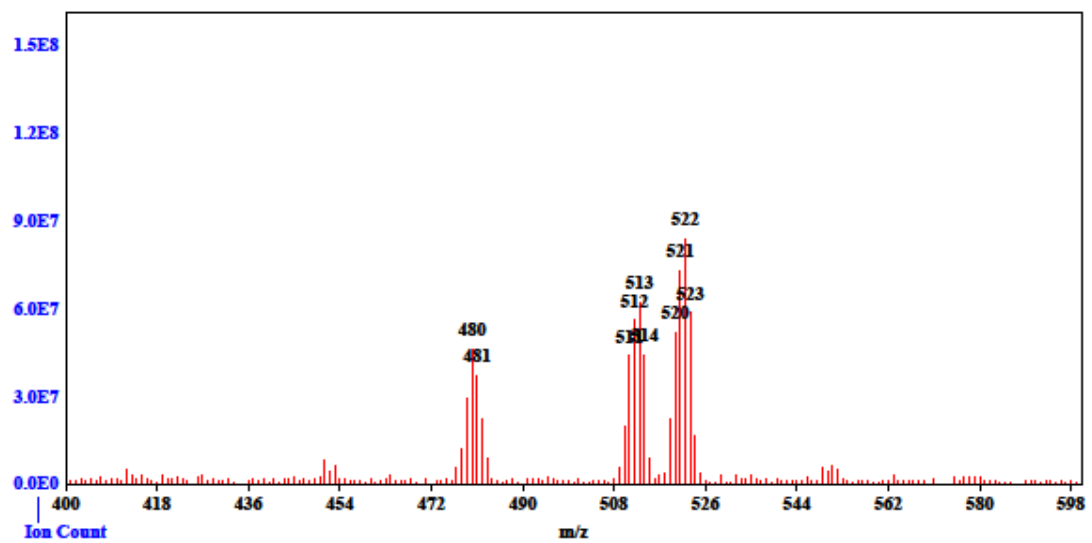

Figure S50. MS spectrum of 15.



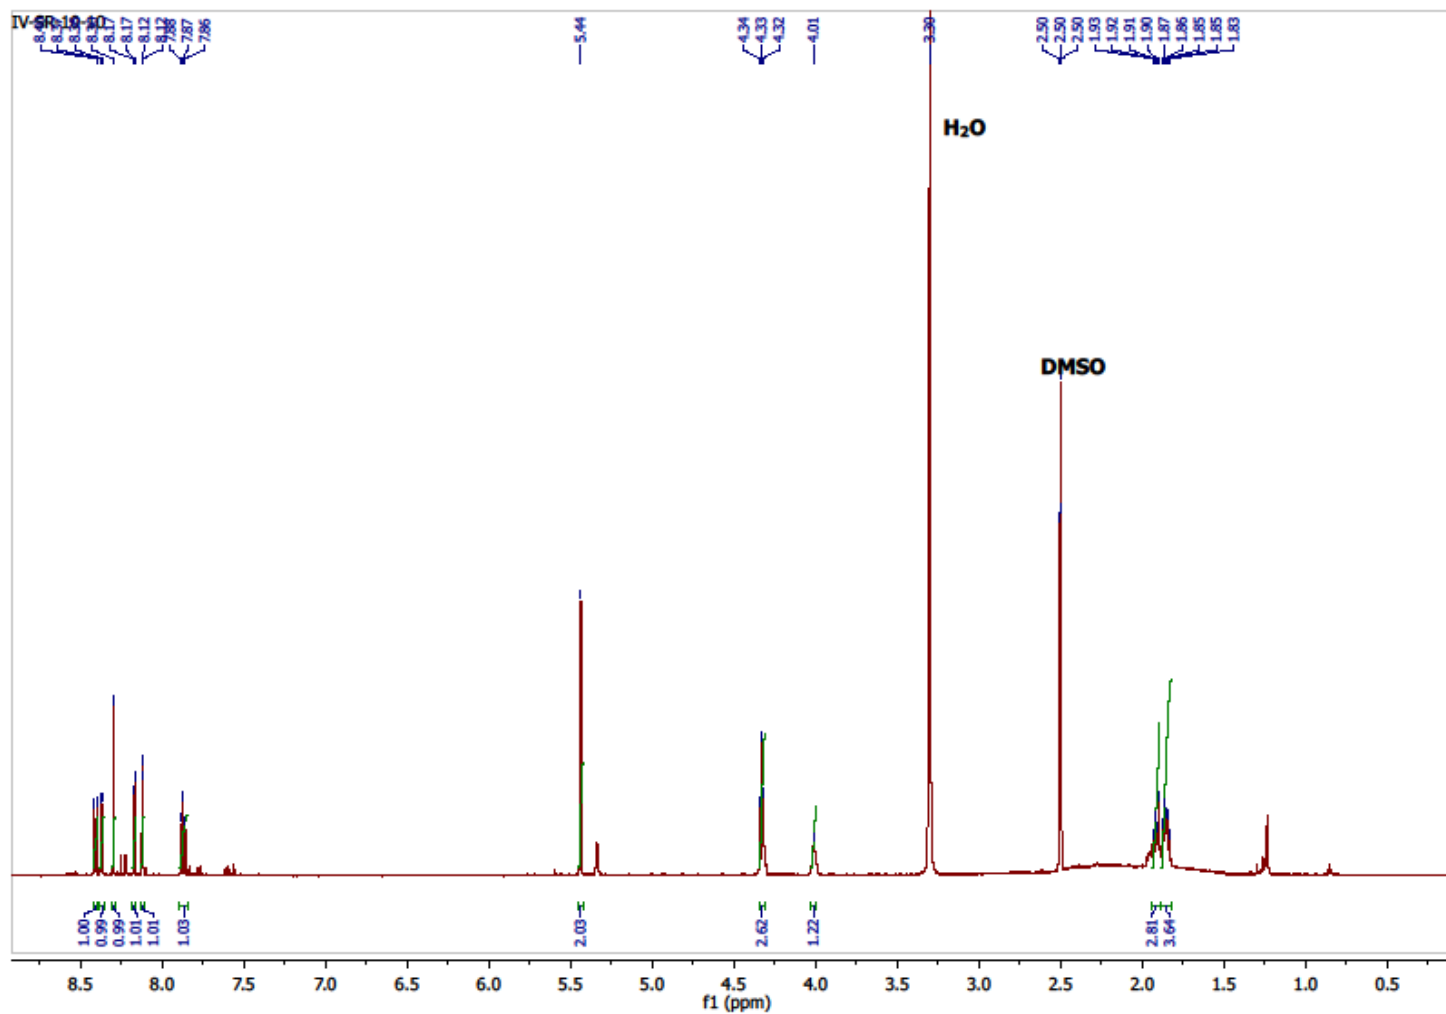

Figure S51. <sup>1</sup>H NMR spectrum of 16.

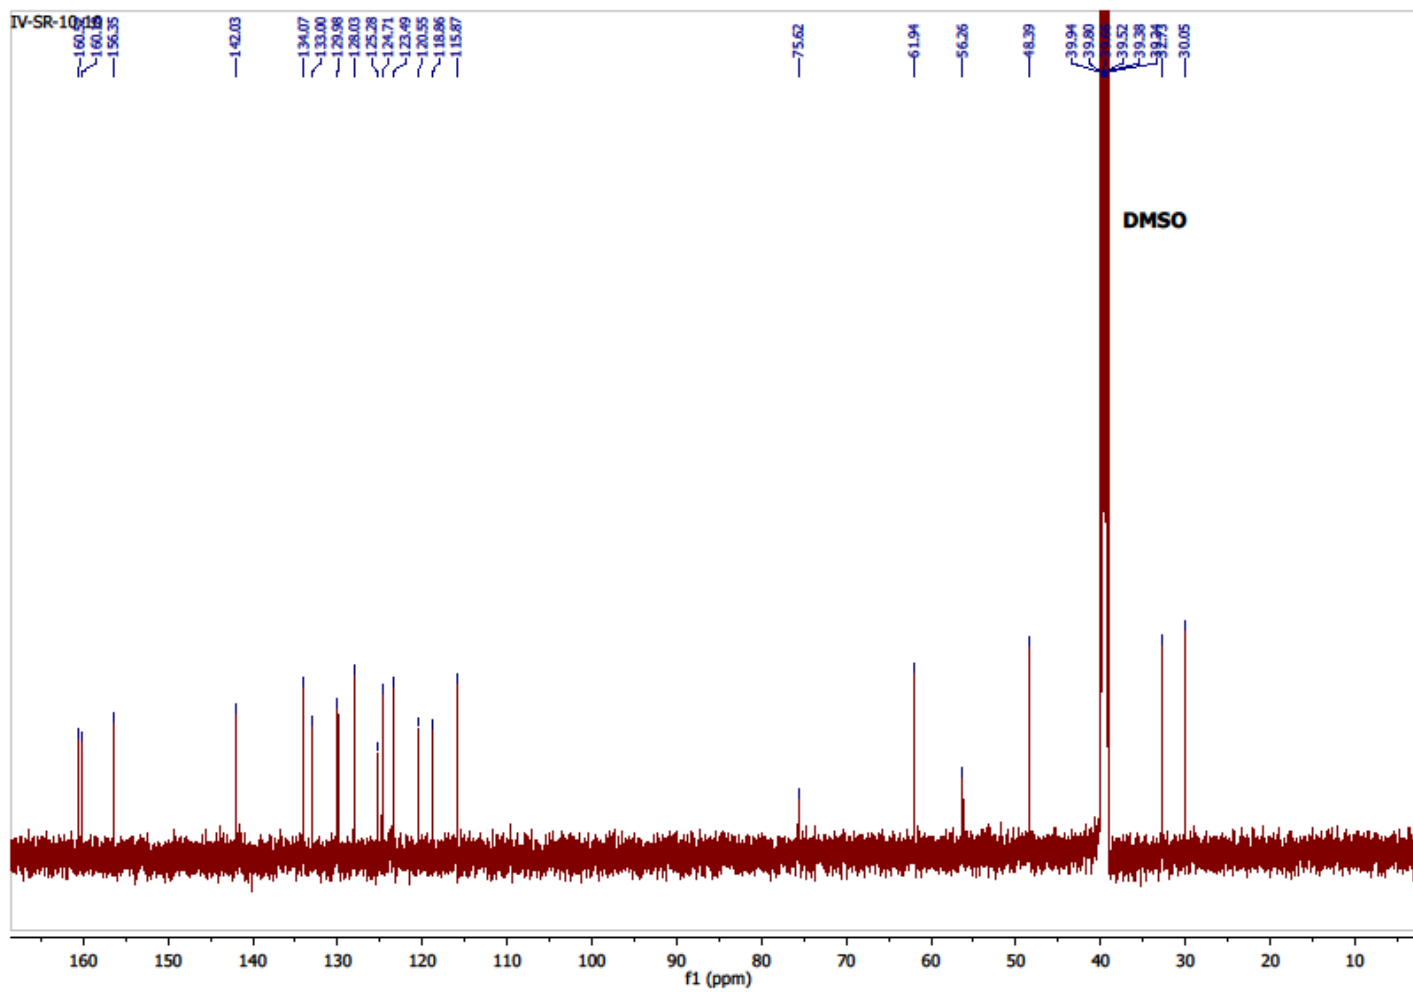

Figure S52.  $^{13}\text{C}$  NMR spectrum of **16**.

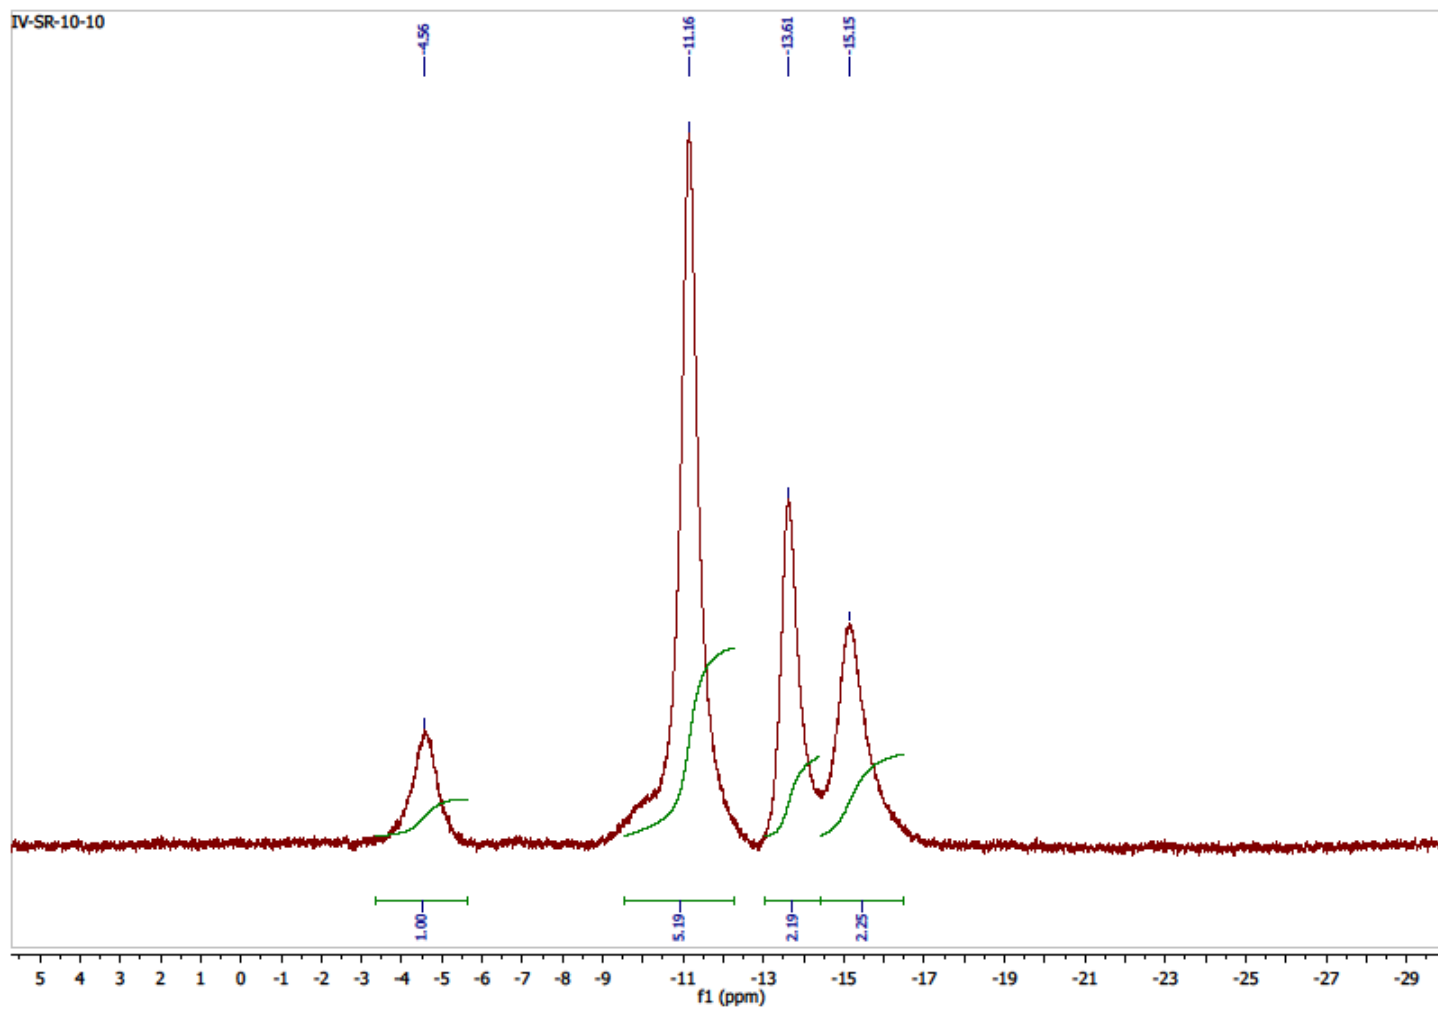

Figure S53.  $^{11}\text{B}$  NMR  $\{^1\text{H BB}\}$  spectrum of 16.

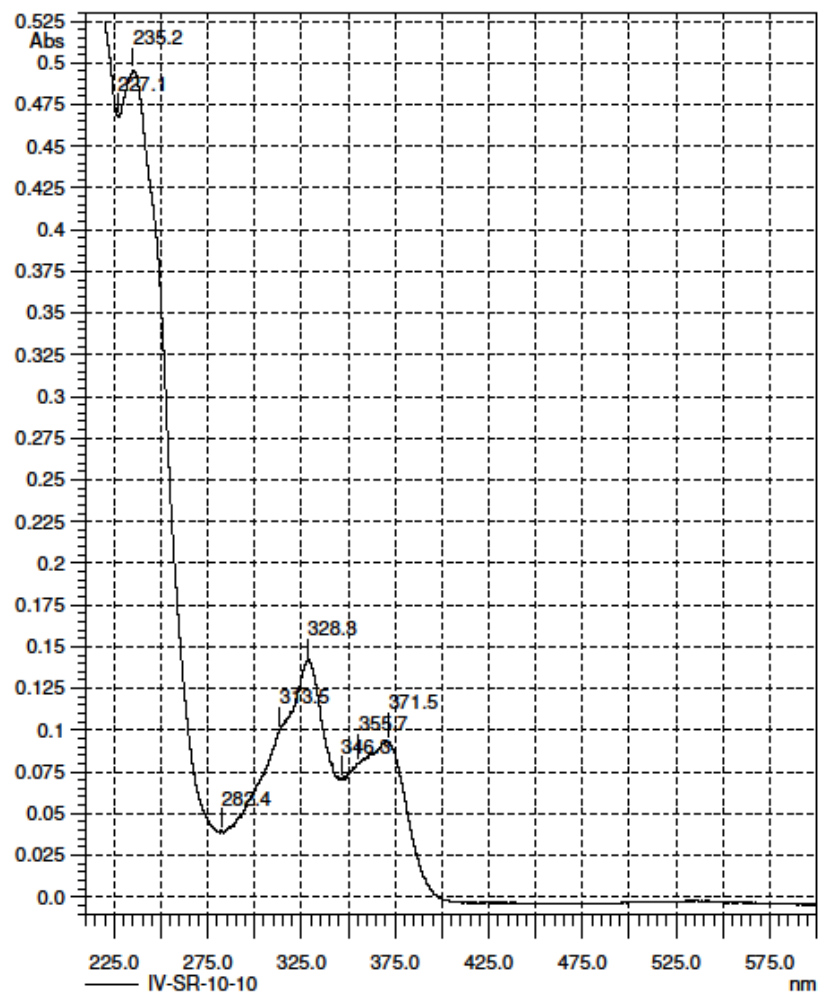

Figure S54. UV spectrum of 16.

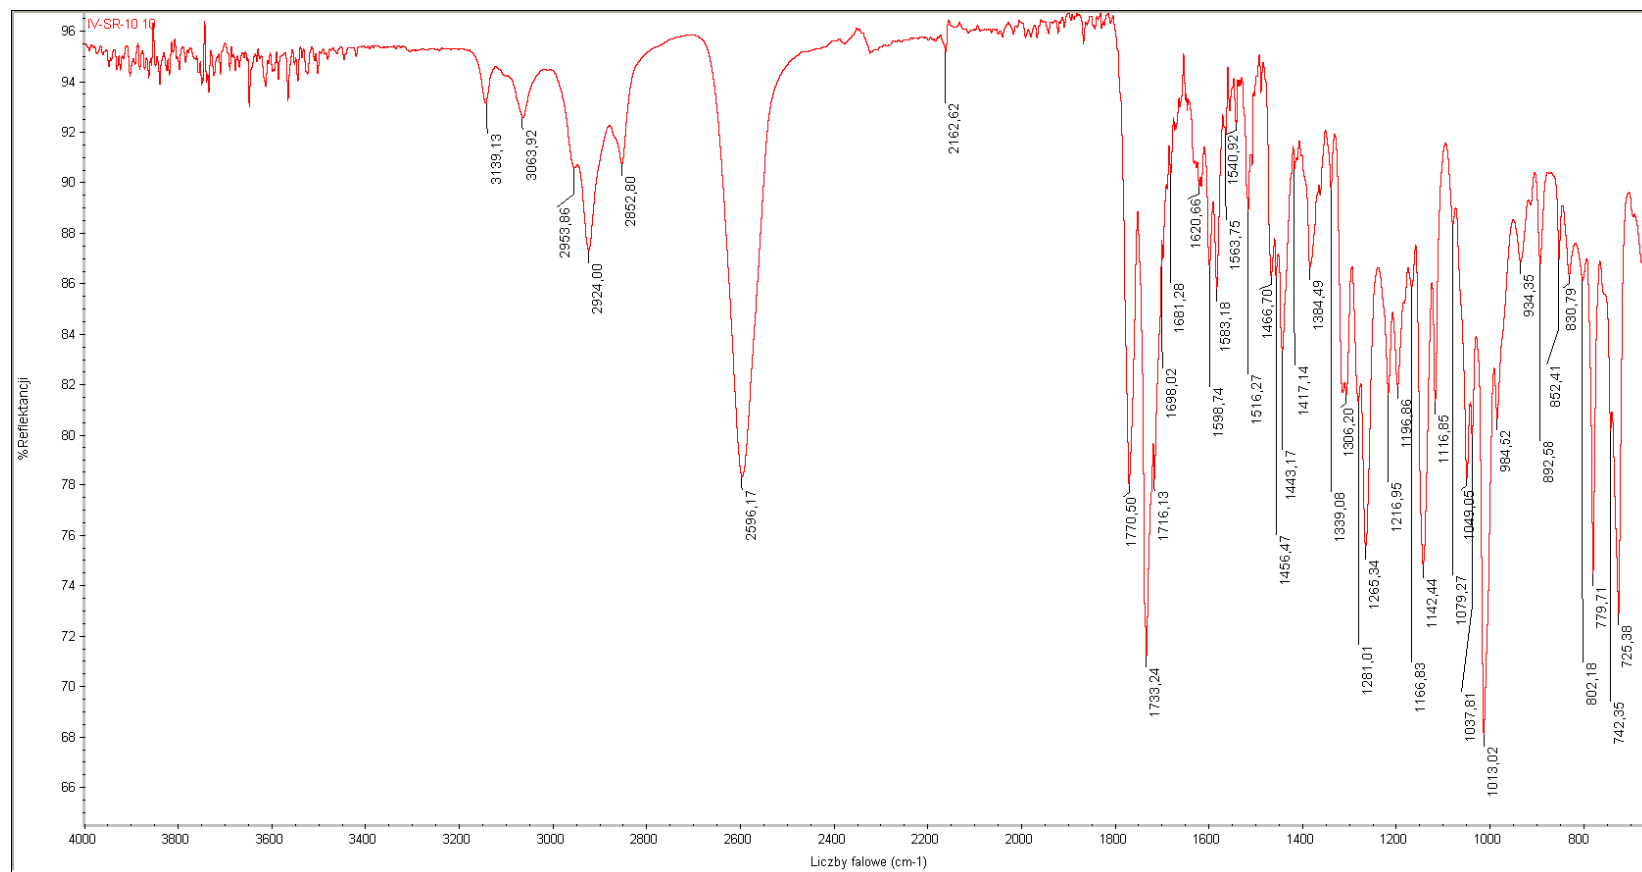

Figure S55. IR spectrum of 16.

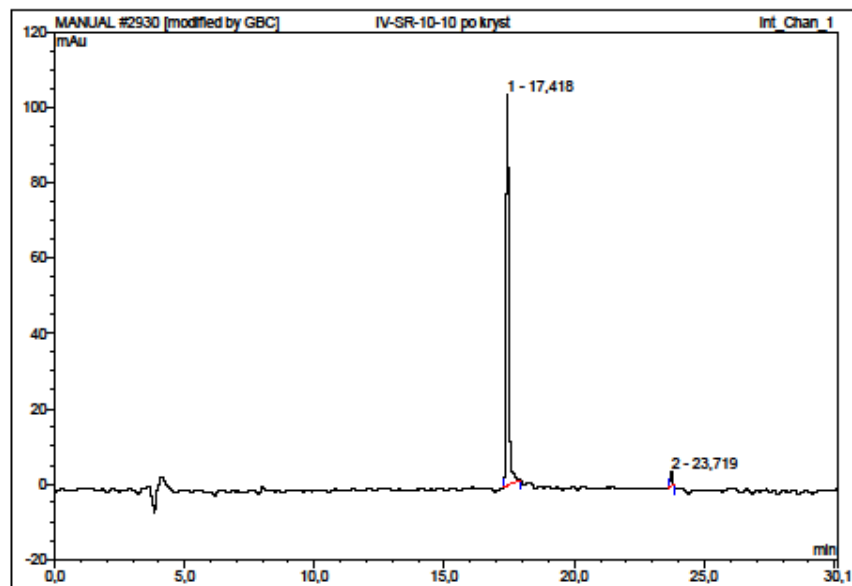

| No.           | Ret.Time<br>min | Peak Name | Height<br>mAu | Area<br>mAu*min | Rel.Area<br>% | Amount | Type |
|---------------|-----------------|-----------|---------------|-----------------|---------------|--------|------|
| 1             | 17,42           | n.a.      | 103,998       | 11,152          | 96,15         | n.a.   | BMB  |
| 2             | 23,72           | n.a.      | 4,200         | 0,446           | 3,85          | n.a.   | BMB* |
| <b>Total:</b> |                 |           | 108,198       | 11,598          | 100,00        | 0,000  |      |

Figure S56. HPLC analysis of 16.

Spectrum Name: IV-SR-10\_10  
Start Ion: 400  
End Ion: 600  
Source: APCI + 10.0µA 400C  
Capillary: 150V 300C Offset: 25V Span: 0V

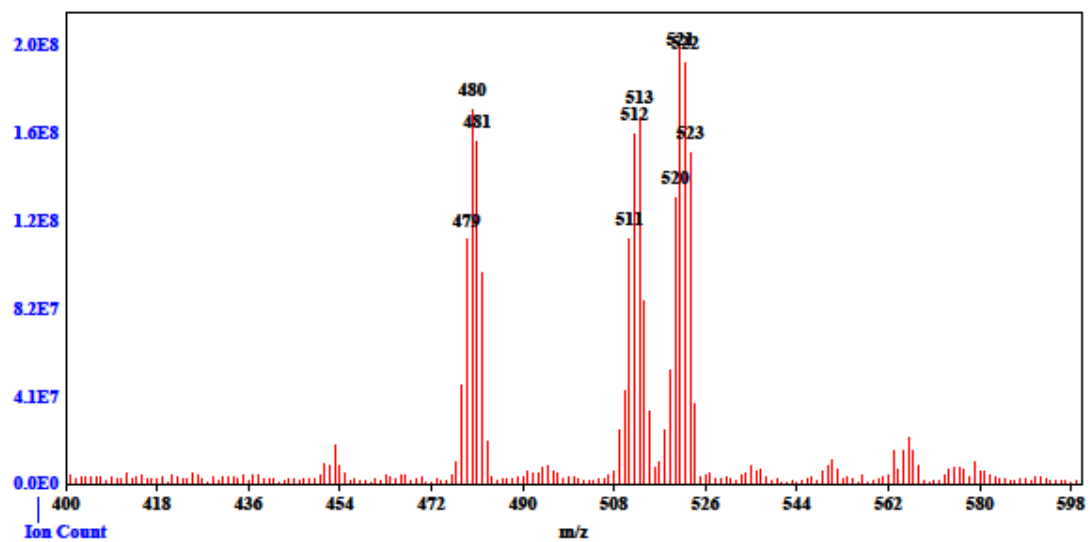

Figure S57. MS spectrum of 16.

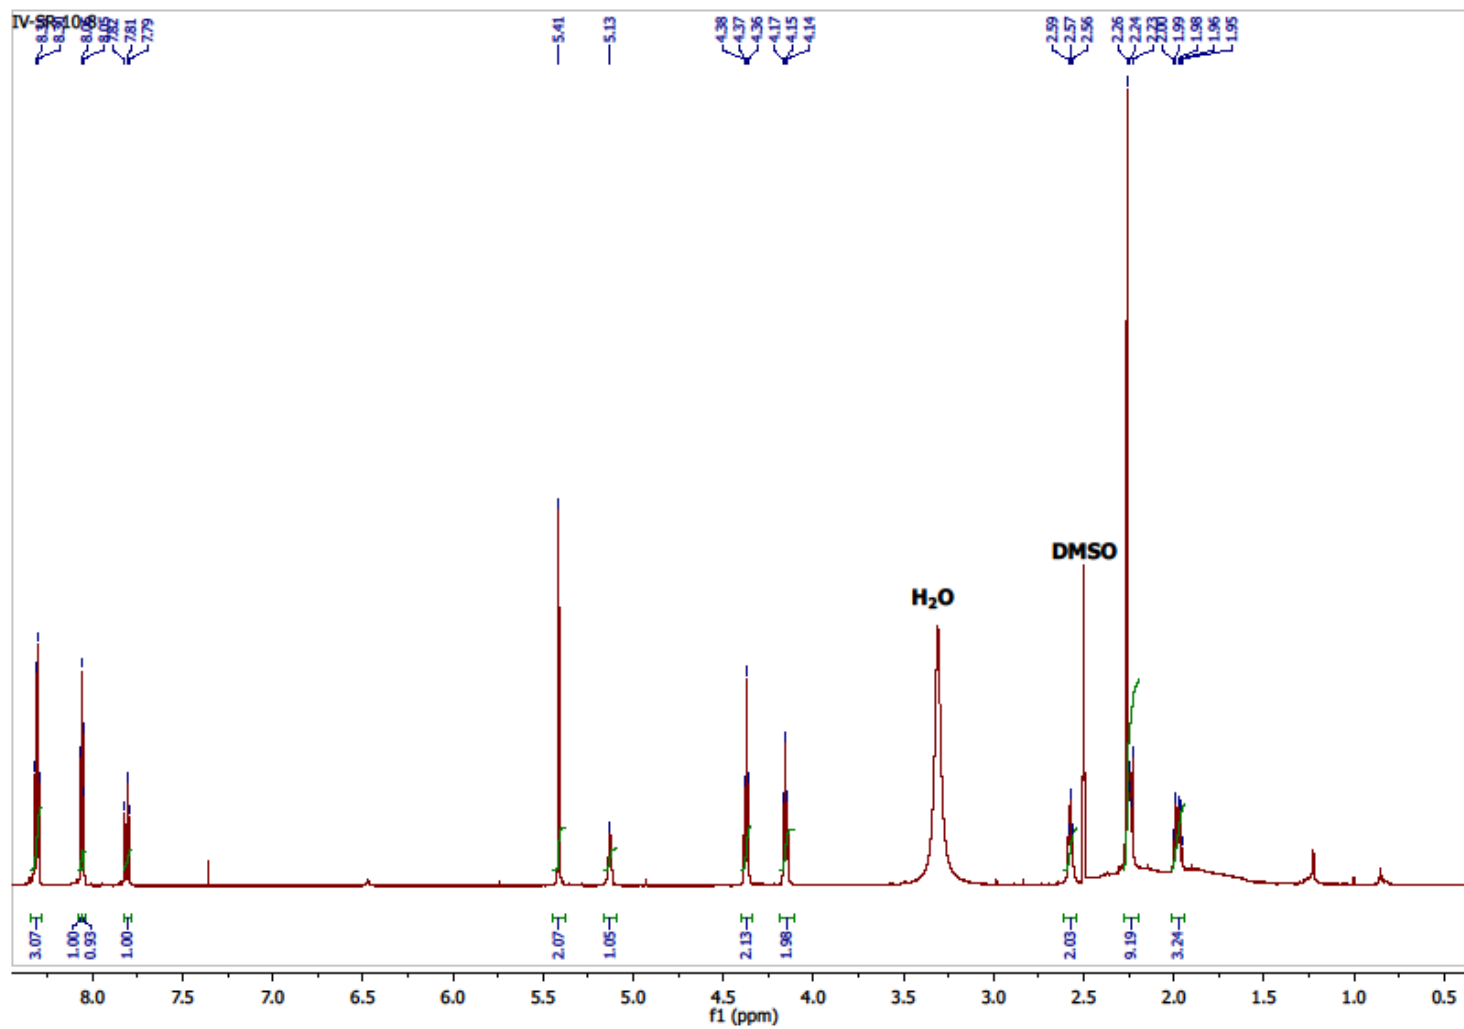

Figure S58.  $^1\text{H}$  NMR spectrum of 17.



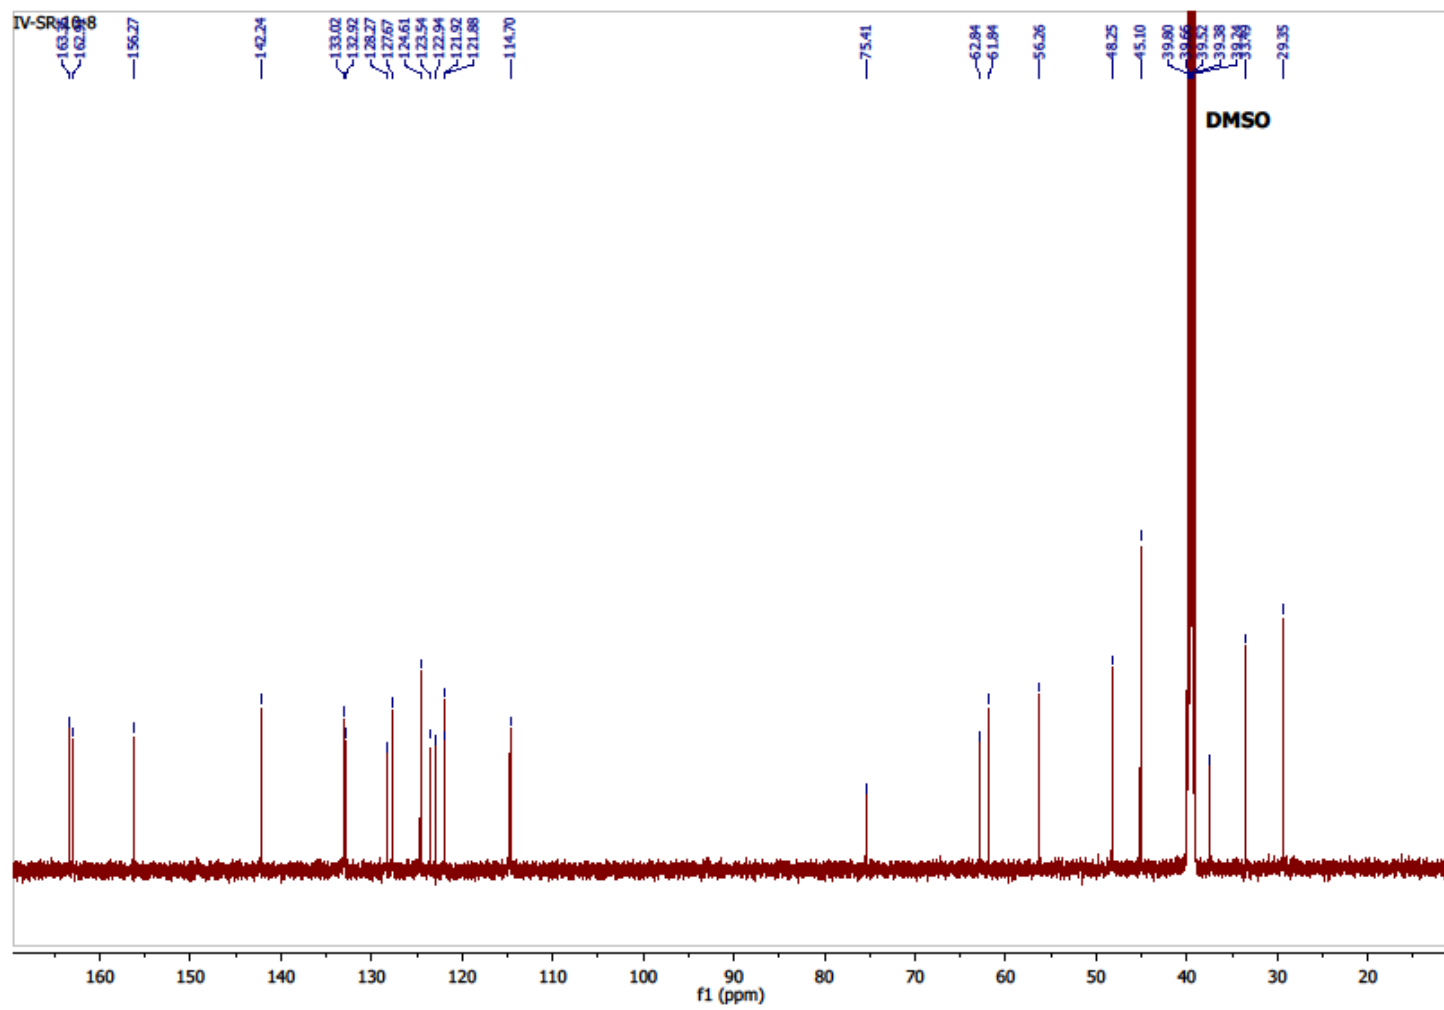

Figure S59.  $^{13}\text{C}$  NMR spectrum of 17.

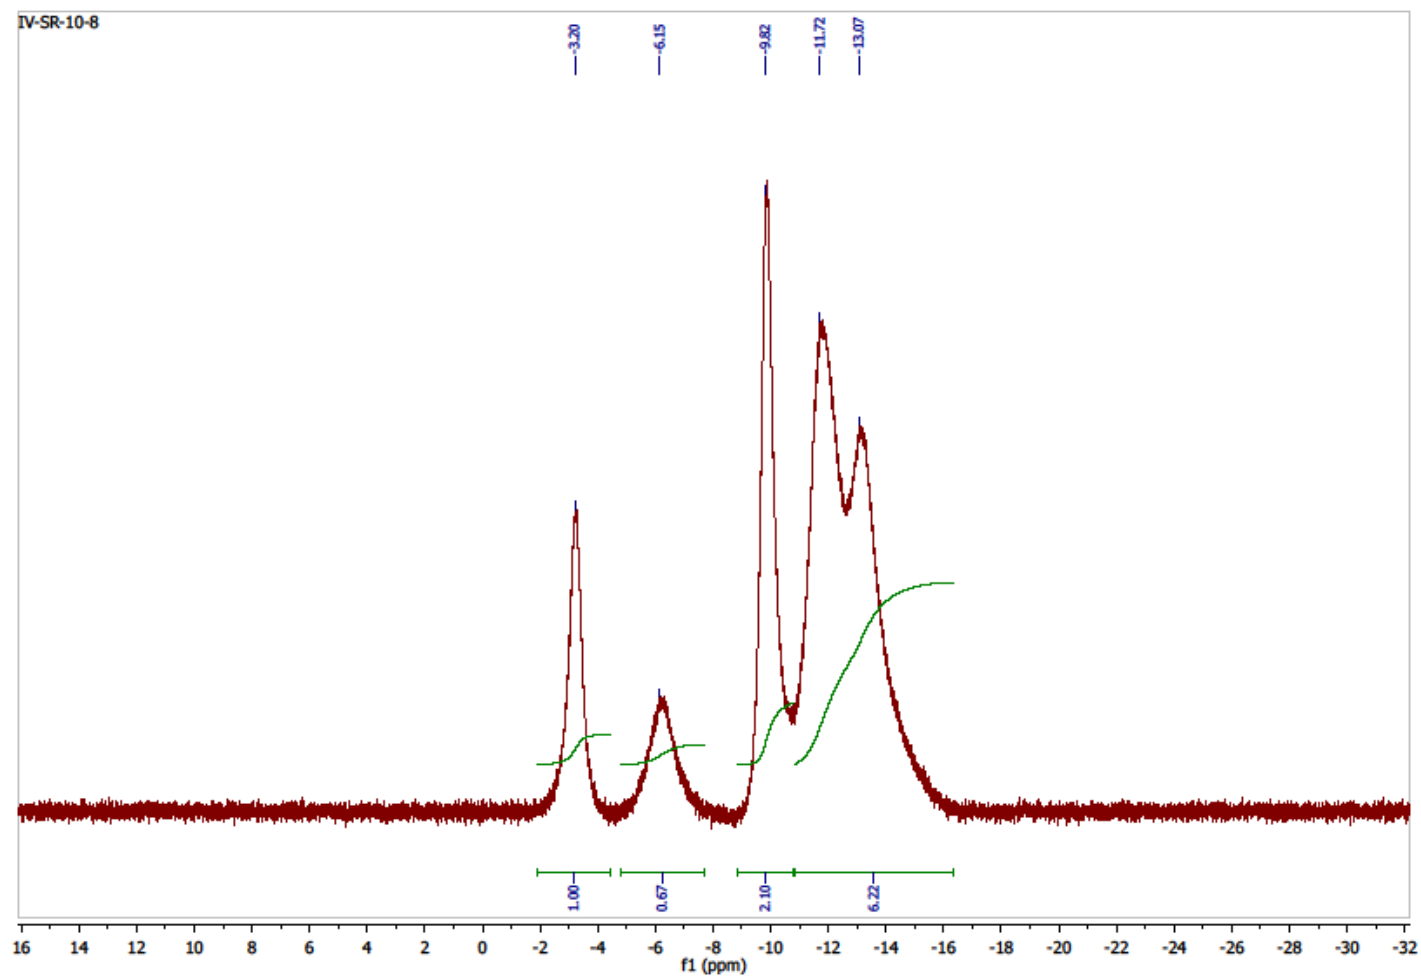

Figure S60.  $^{11}\text{B}$  NMR  $\{^1\text{H BB}\}$  spectrum of 17.

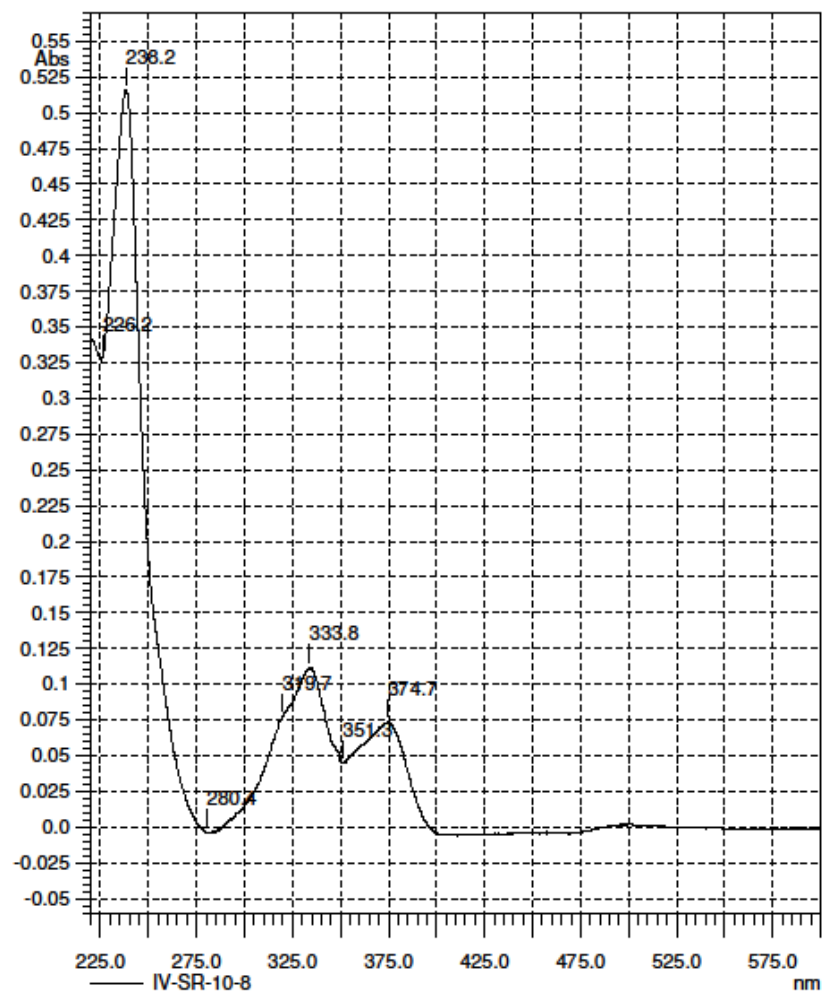

Figure S61. UV spectrum of 17.

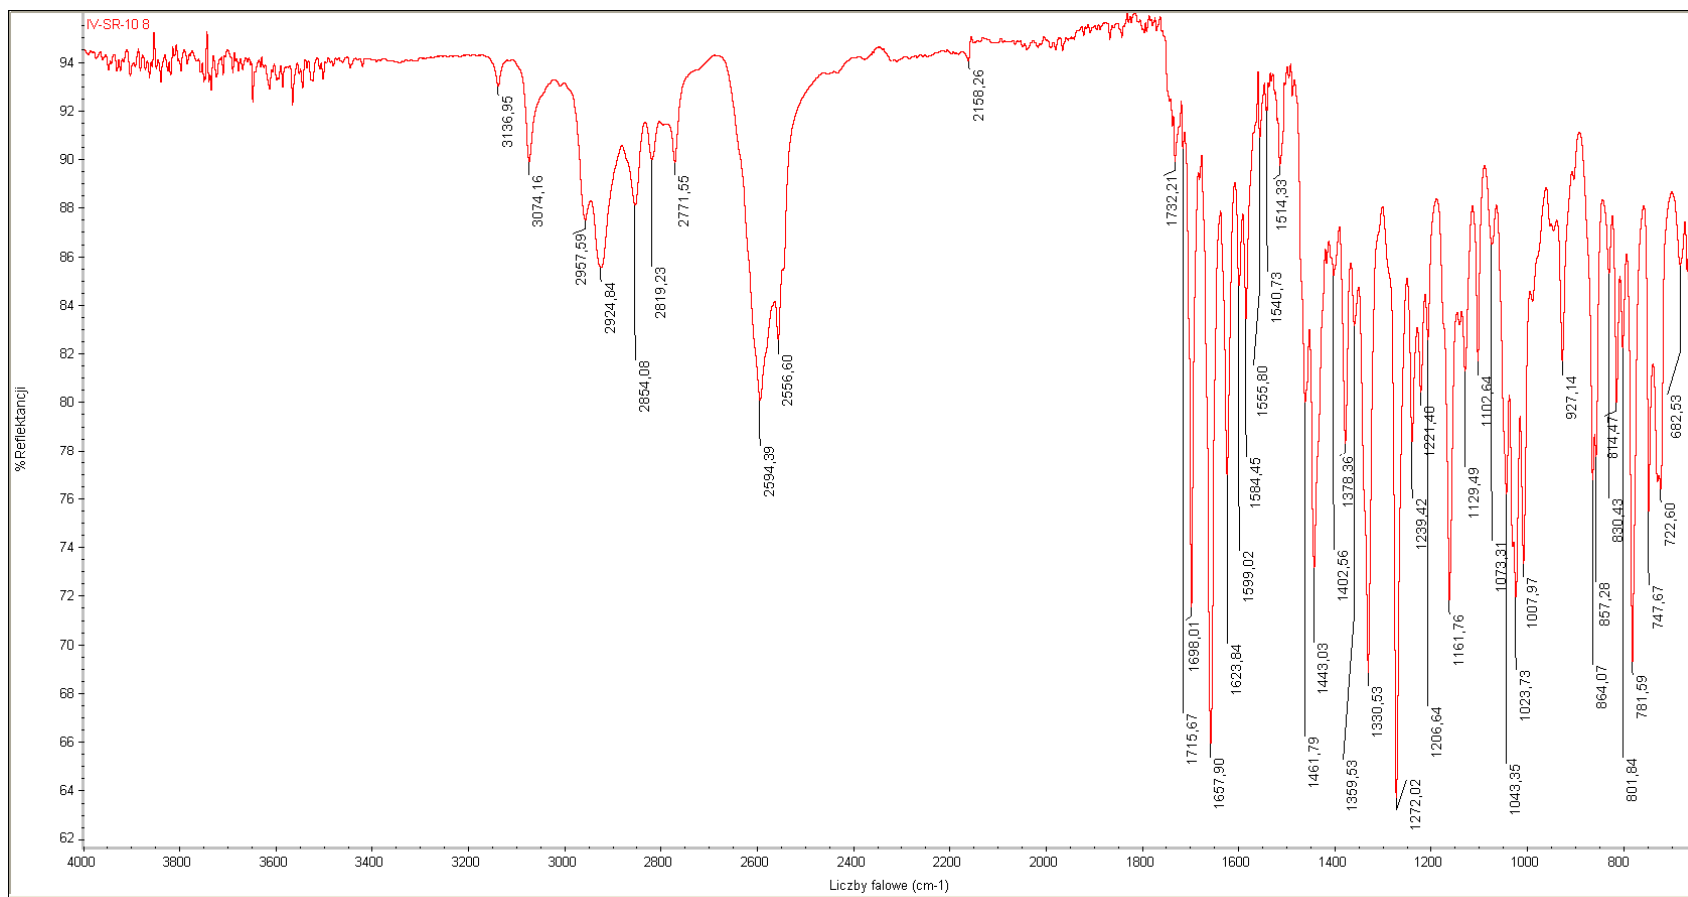

Figure S62. IR spectrum of 17.

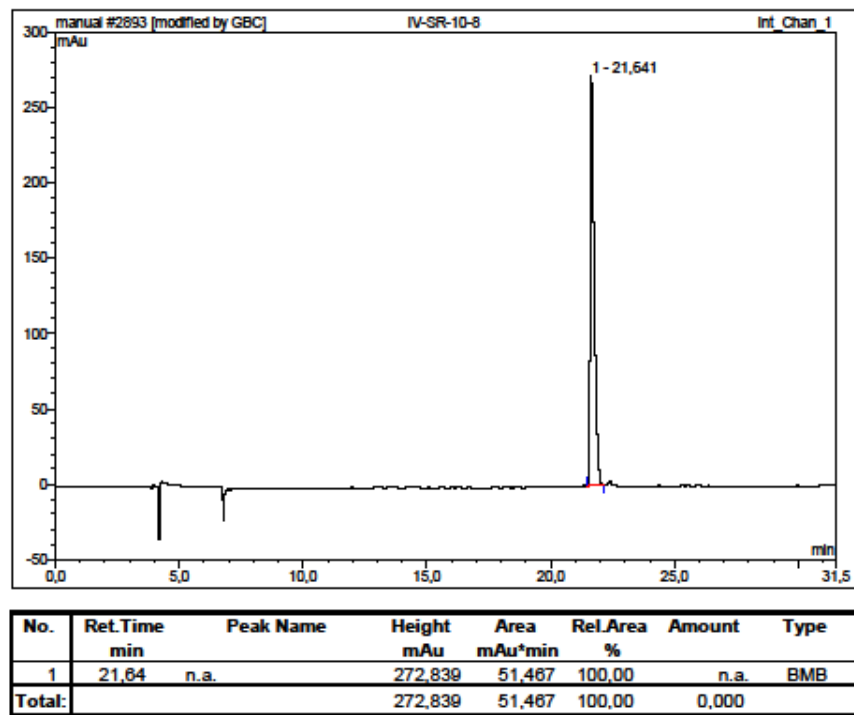

Figure S63. HPLC analysis of 17.

Spectrum Name: IV-SR-10\_8\_PT  
Start Ion: 400  
End Ion: 700  
Source: APCI + 10.0µA 400C  
Capillary: 150V 300C Offset: 25V Span: 0V

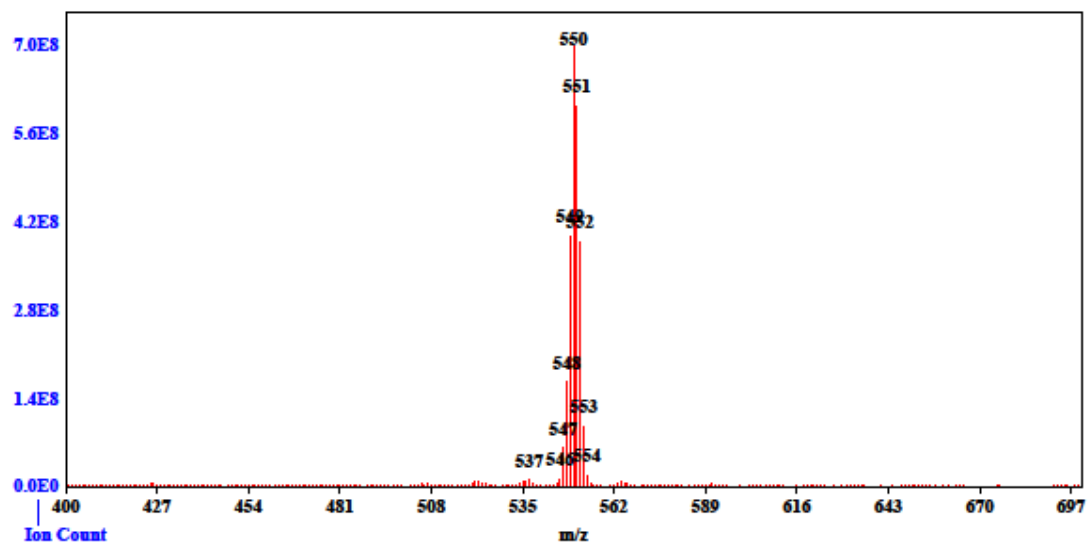

Figure S64. MS spectrum of 17.

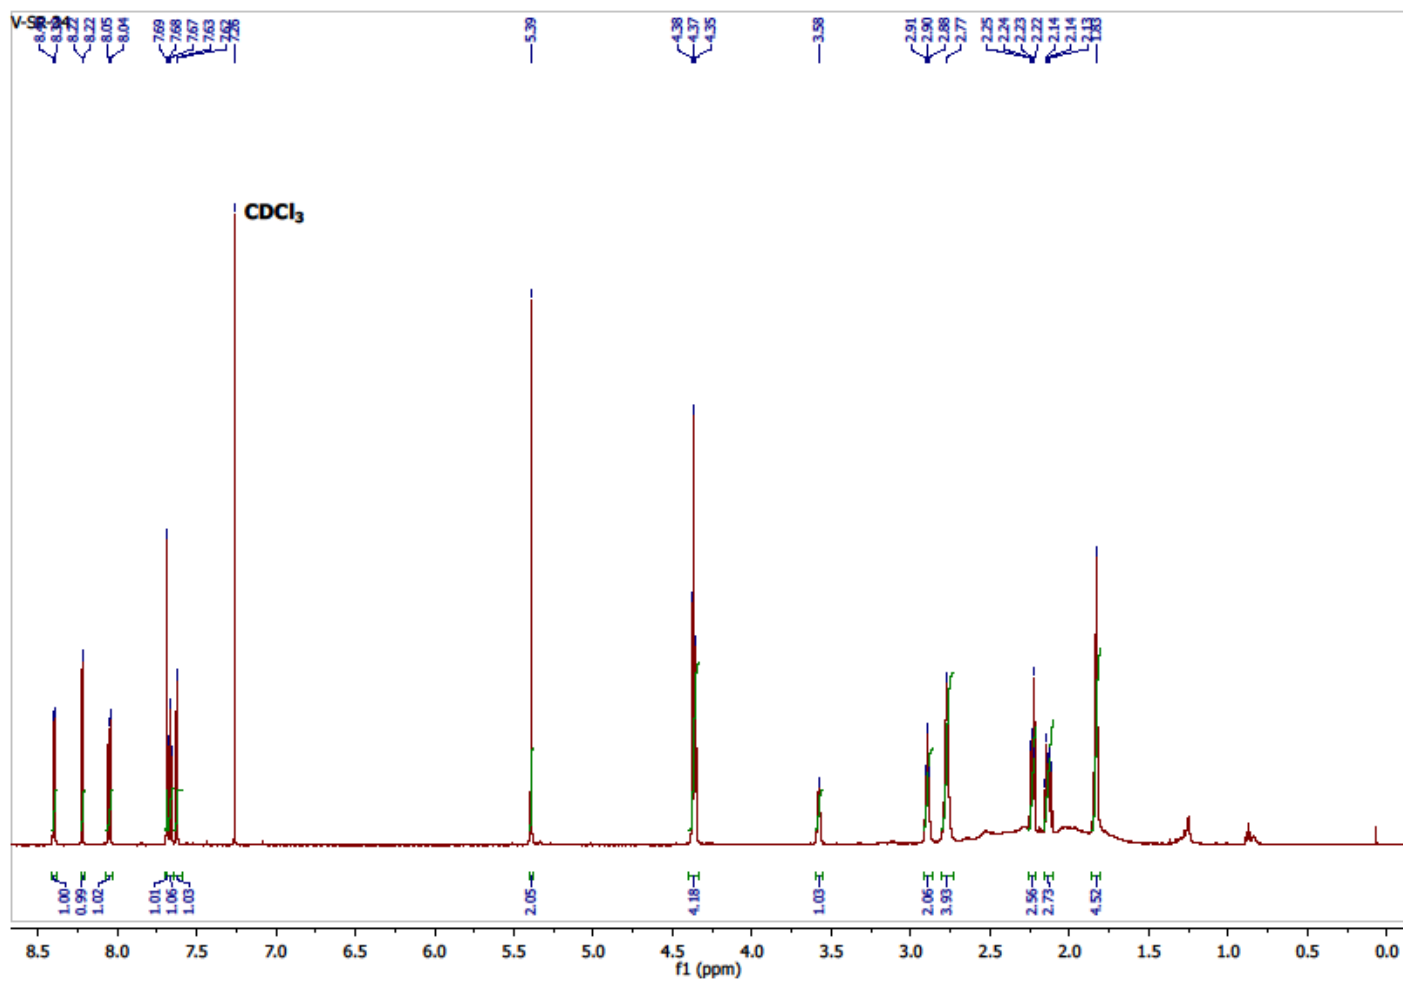

Figure S65.  $^1\text{H}$  NMR spectrum of 18.

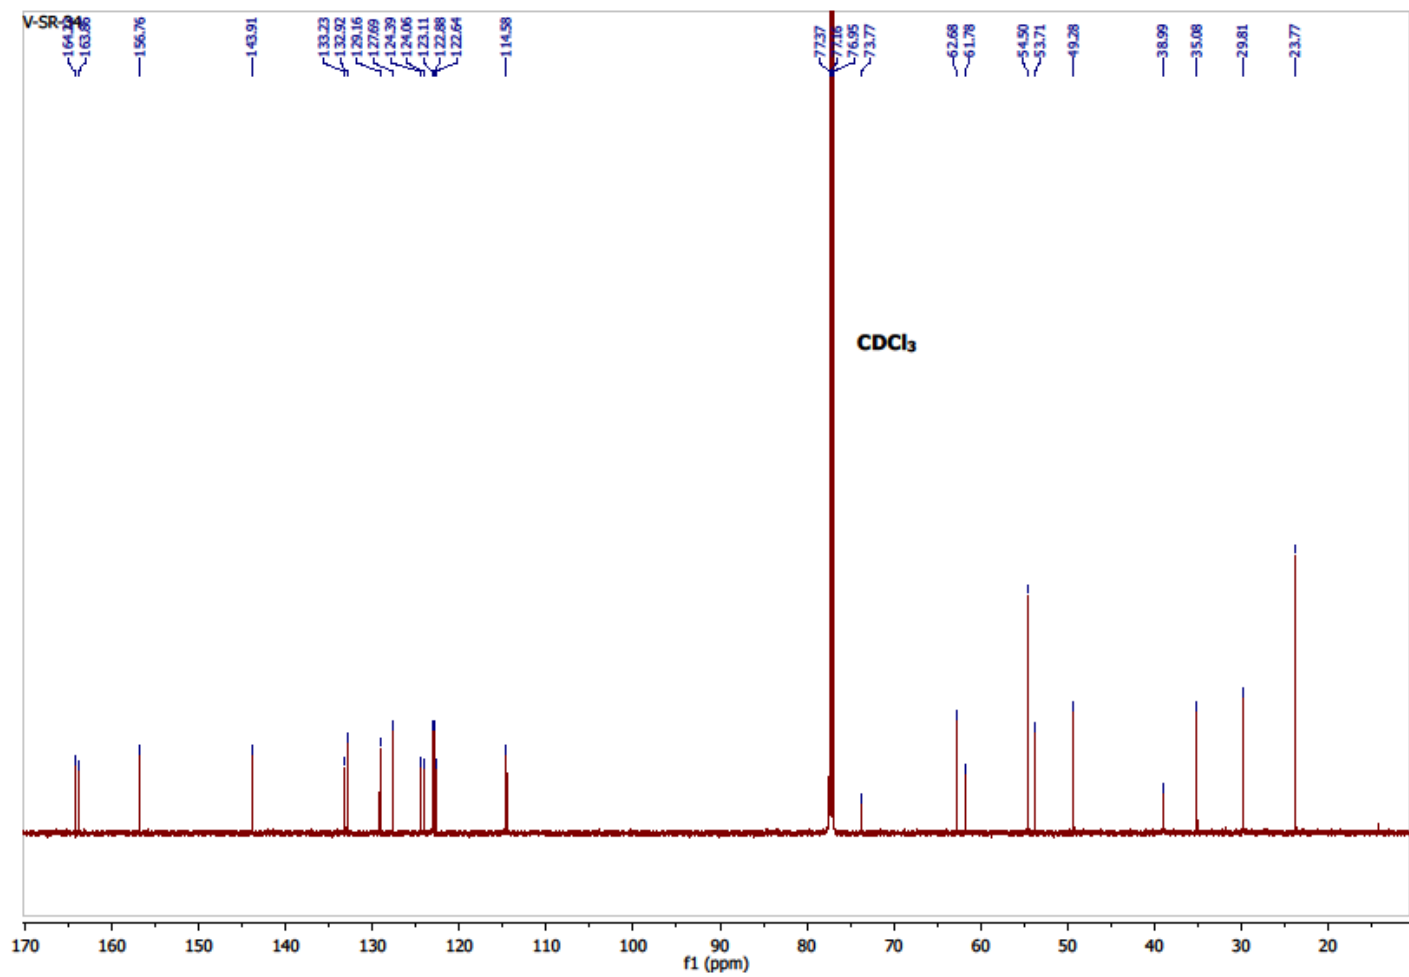

Figure S66. <sup>13</sup>C NMR spectrum of 18.



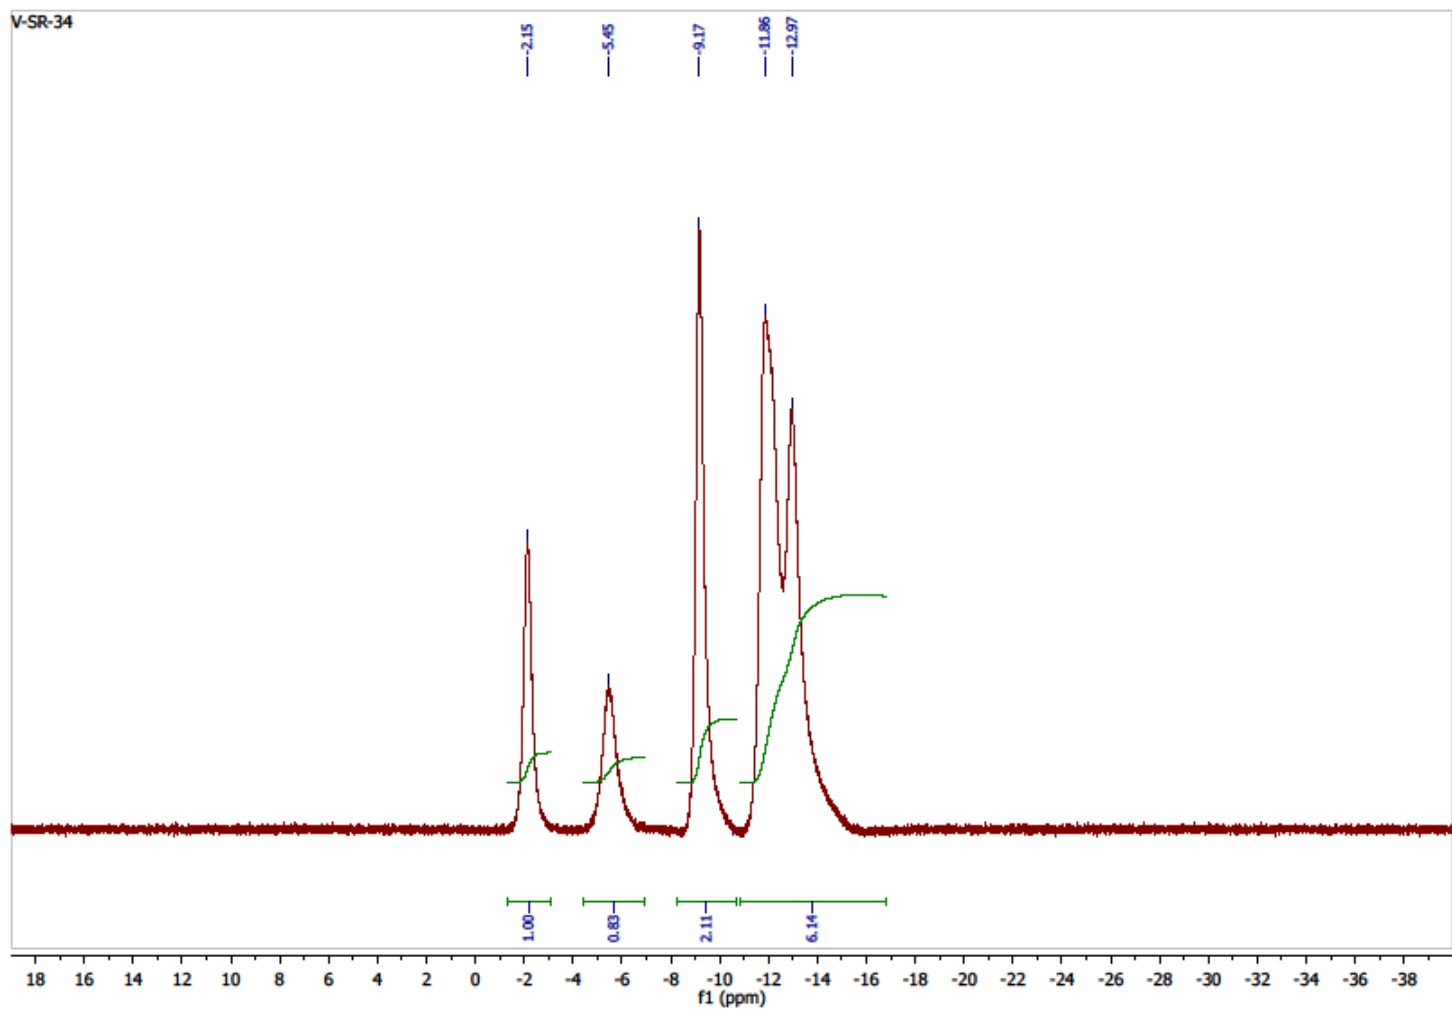

Figure S67.  $^{11}\text{B}$  NMR  $\{^1\text{H BB}\}$  spectrum of 18.

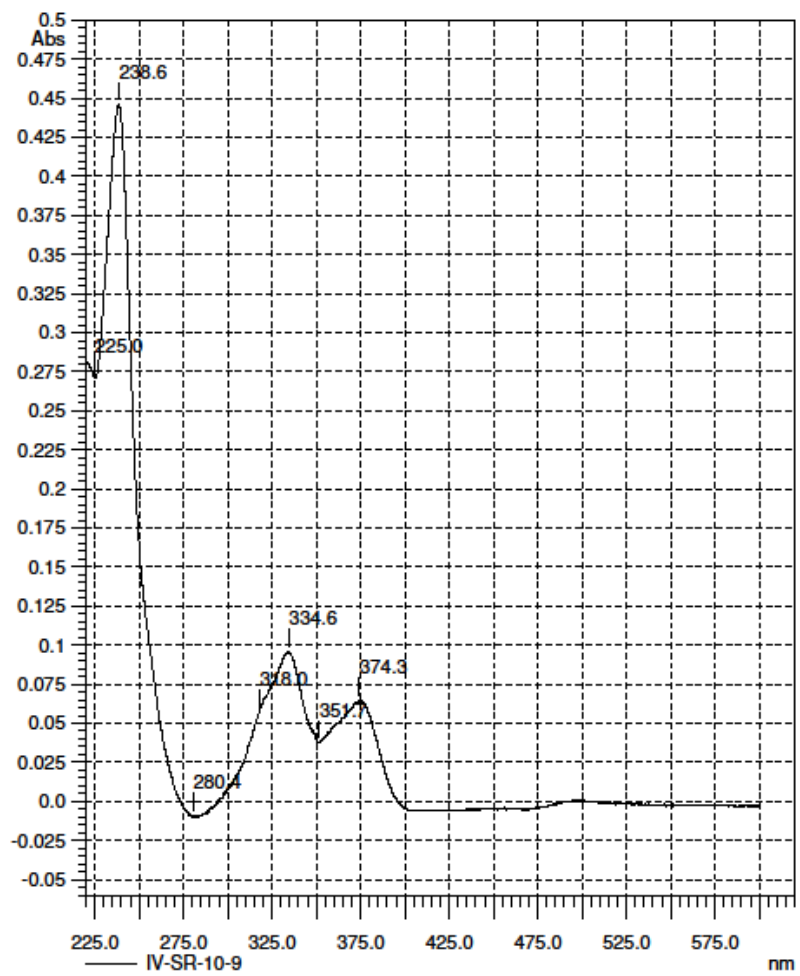

Figure S68. UV spectrum of 18.

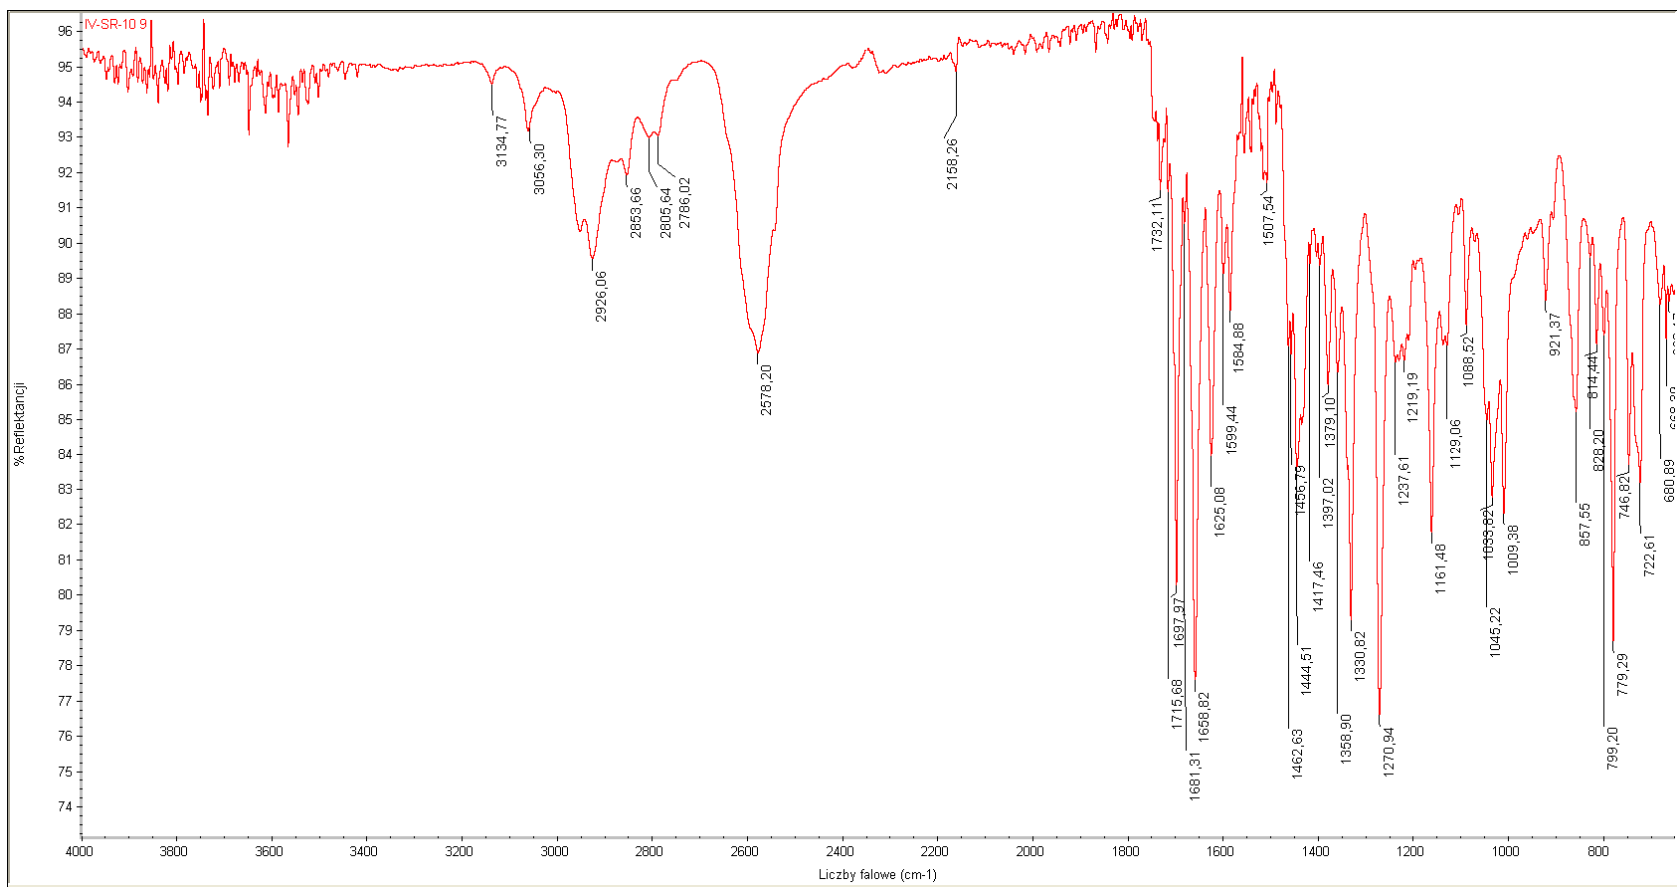

Figure S69. IR spectrum of 18.

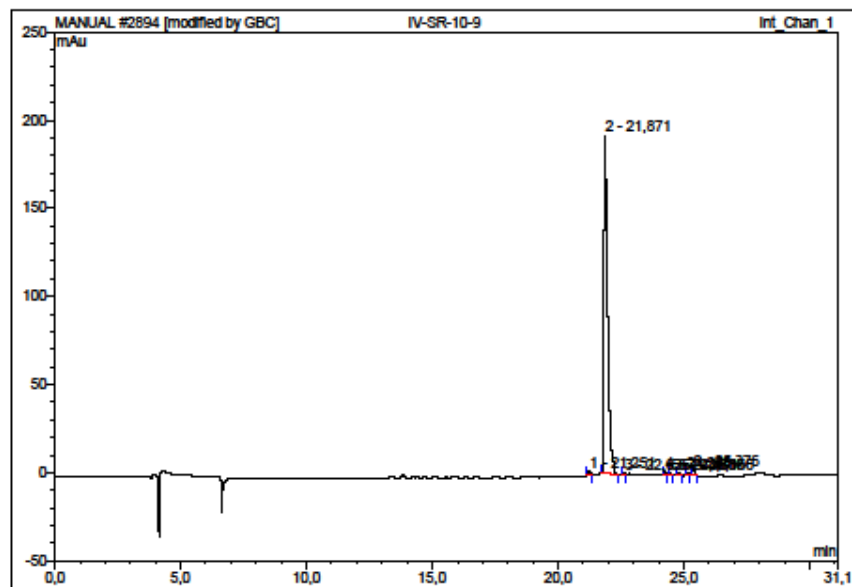

| No.           | Ret. Time<br>min | Peak Name | Height<br>mAu | Area<br>mAu*min | Rel. Area<br>% | Amount | Type |
|---------------|------------------|-----------|---------------|-----------------|----------------|--------|------|
| 1             | 21,25            | n.a.      | 1,985         | 0,193           | 0,56           | n.a.   | BMB* |
| 2             | 21,87            | n.a.      | 191,502       | 33,011          | 96,79          | n.a.   | BMB  |
| 3             | 22,64            | n.a.      | 0,708         | 0,071           | 0,21           | n.a.   | BMB* |
| 4             | 24,27            | n.a.      | 1,989         | 0,186           | 0,54           | n.a.   | BMB* |
| 5             | 24,48            | n.a.      | 0,728         | 0,065           | 0,19           | n.a.   | BMB* |
| 6             | 24,80            | n.a.      | 1,215         | 0,127           | 0,37           | n.a.   | BMB* |
| 7             | 25,17            | n.a.      | 0,822         | 0,078           | 0,23           | n.a.   | BMB* |
| 8             | 25,38            | n.a.      | 2,904         | 0,375           | 1,10           | n.a.   | BMB* |
| <b>Total:</b> |                  |           | 201,851       | 34,108          | 100,00         | 0,000  |      |

Figure S70. HPLC analysis of 18.

Spectrum Name: IV-SR-10\_9\_PT  
Start Ion: 400  
End Ion: 700  
Source: APCI + 10.0µA 400C  
Capillary: 150V 300C Offset: 25V Span: 0V

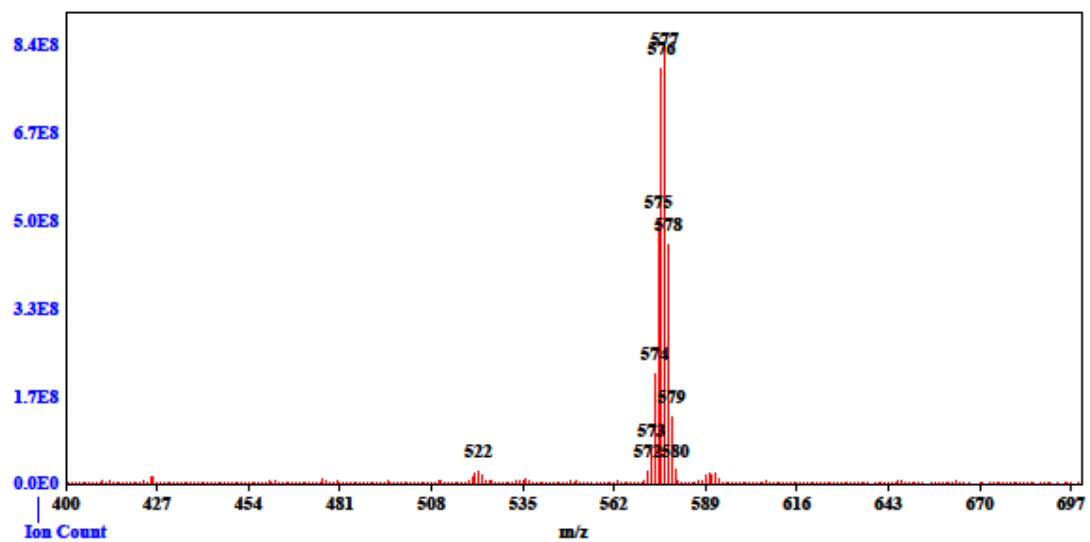

Figure S71. MS spectrum of 18.

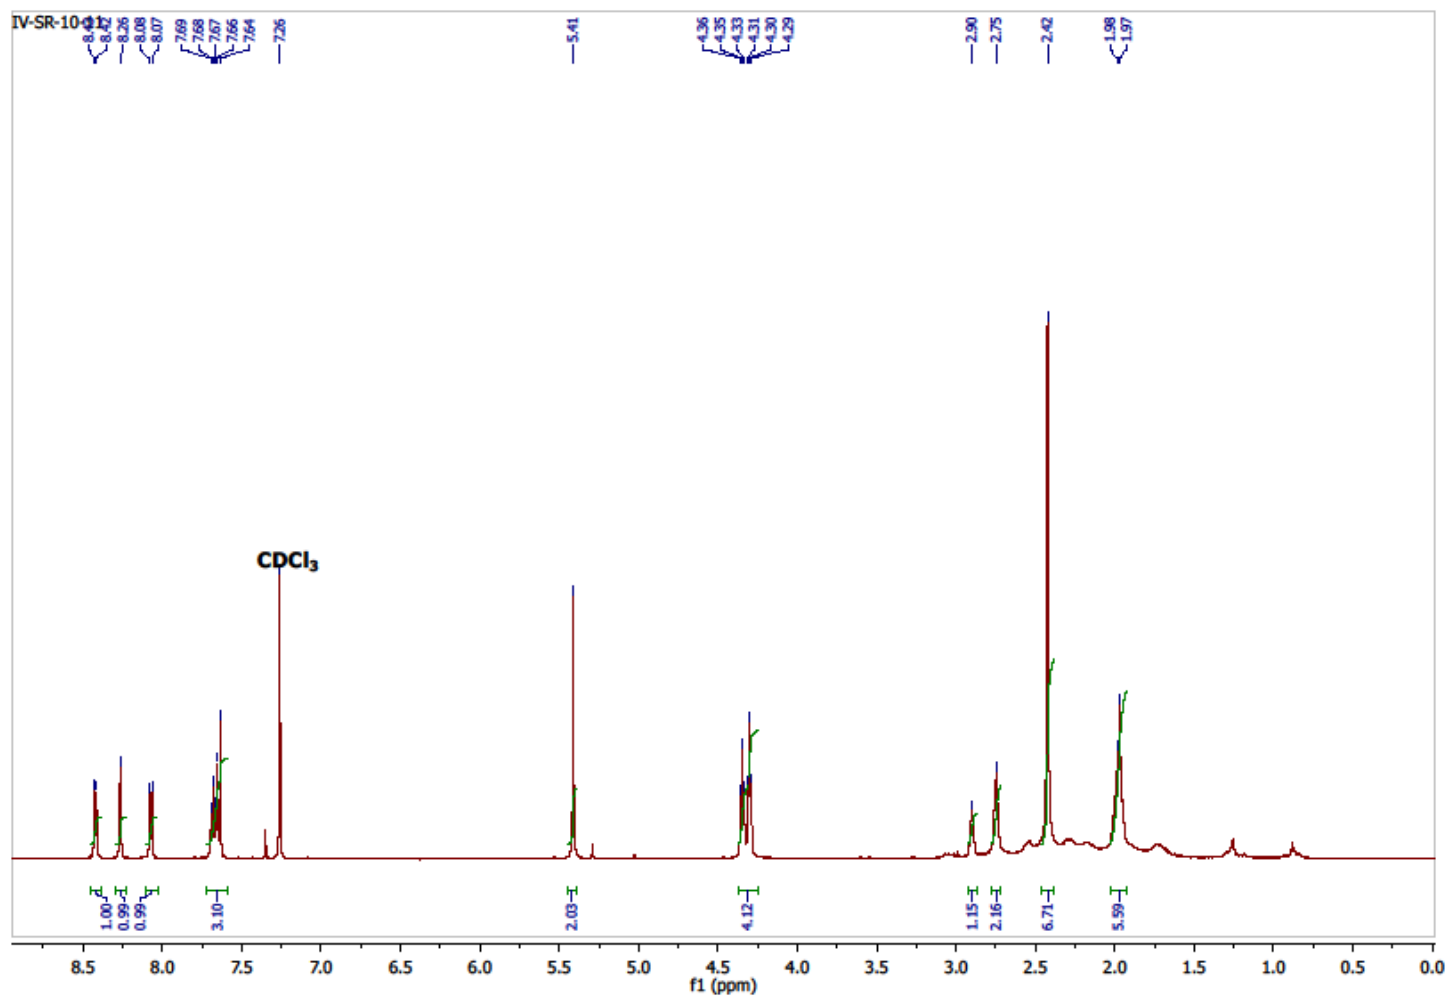

Figure S72. <sup>1</sup>H NMR spectrum of 19.

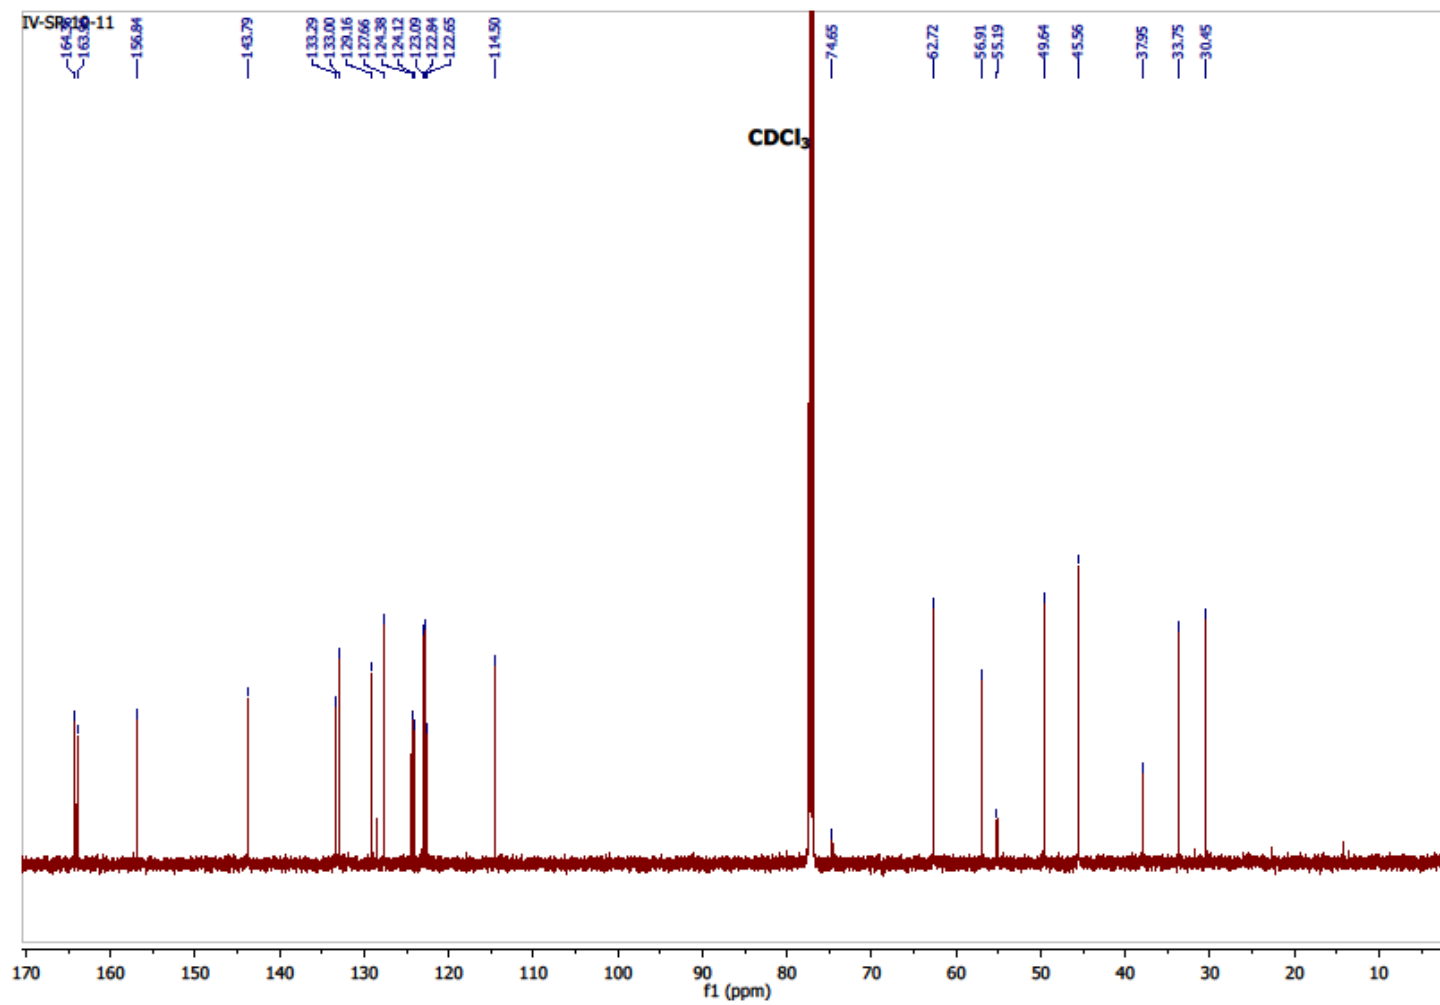

Figure S73. <sup>13</sup>C NMR spectrum of 19.

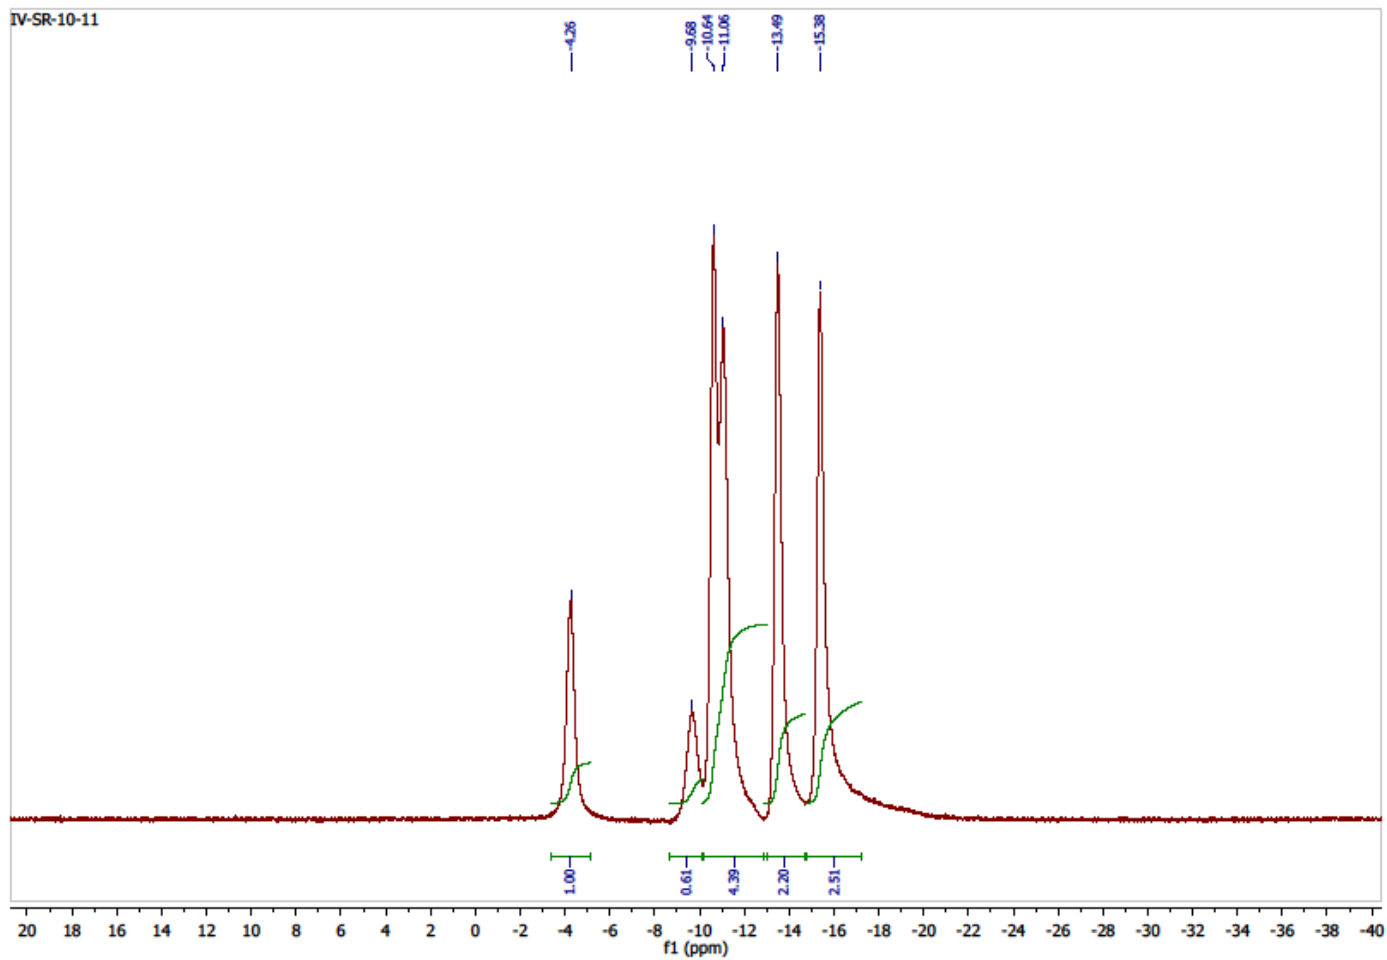

Figure S74.  $^{11}\text{B}$  NMR  $\{^1\text{H BB}\}$  spectrum of 19.



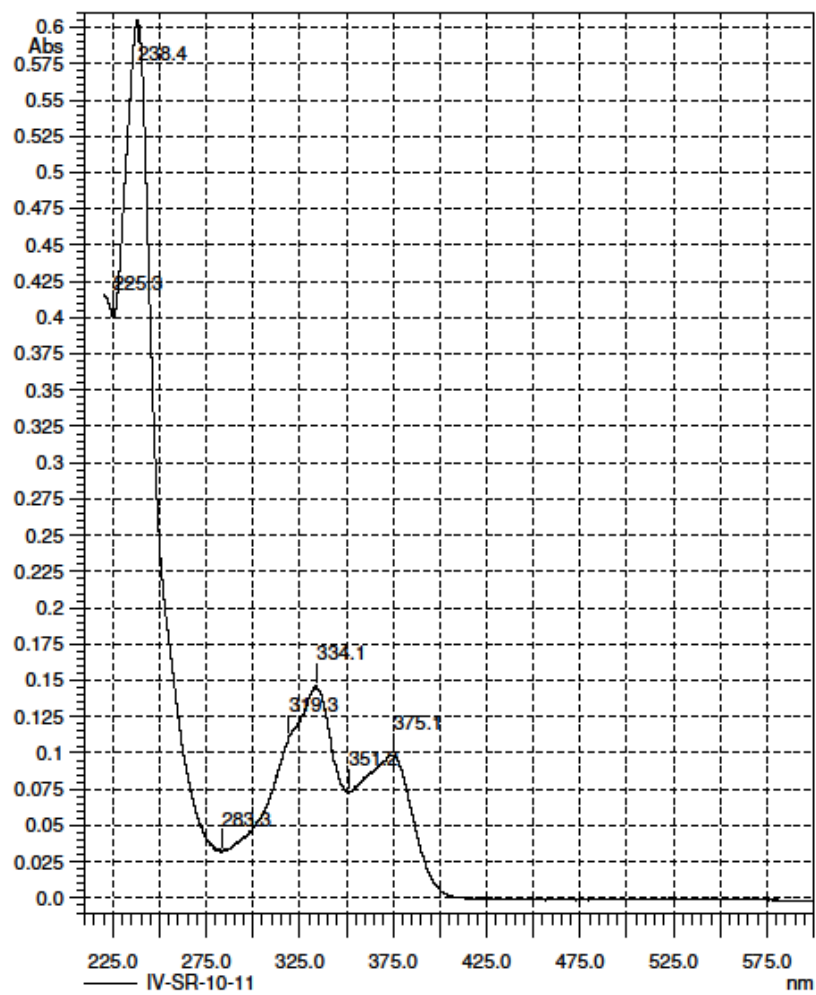

Figure S75. UV spectrum of 19.

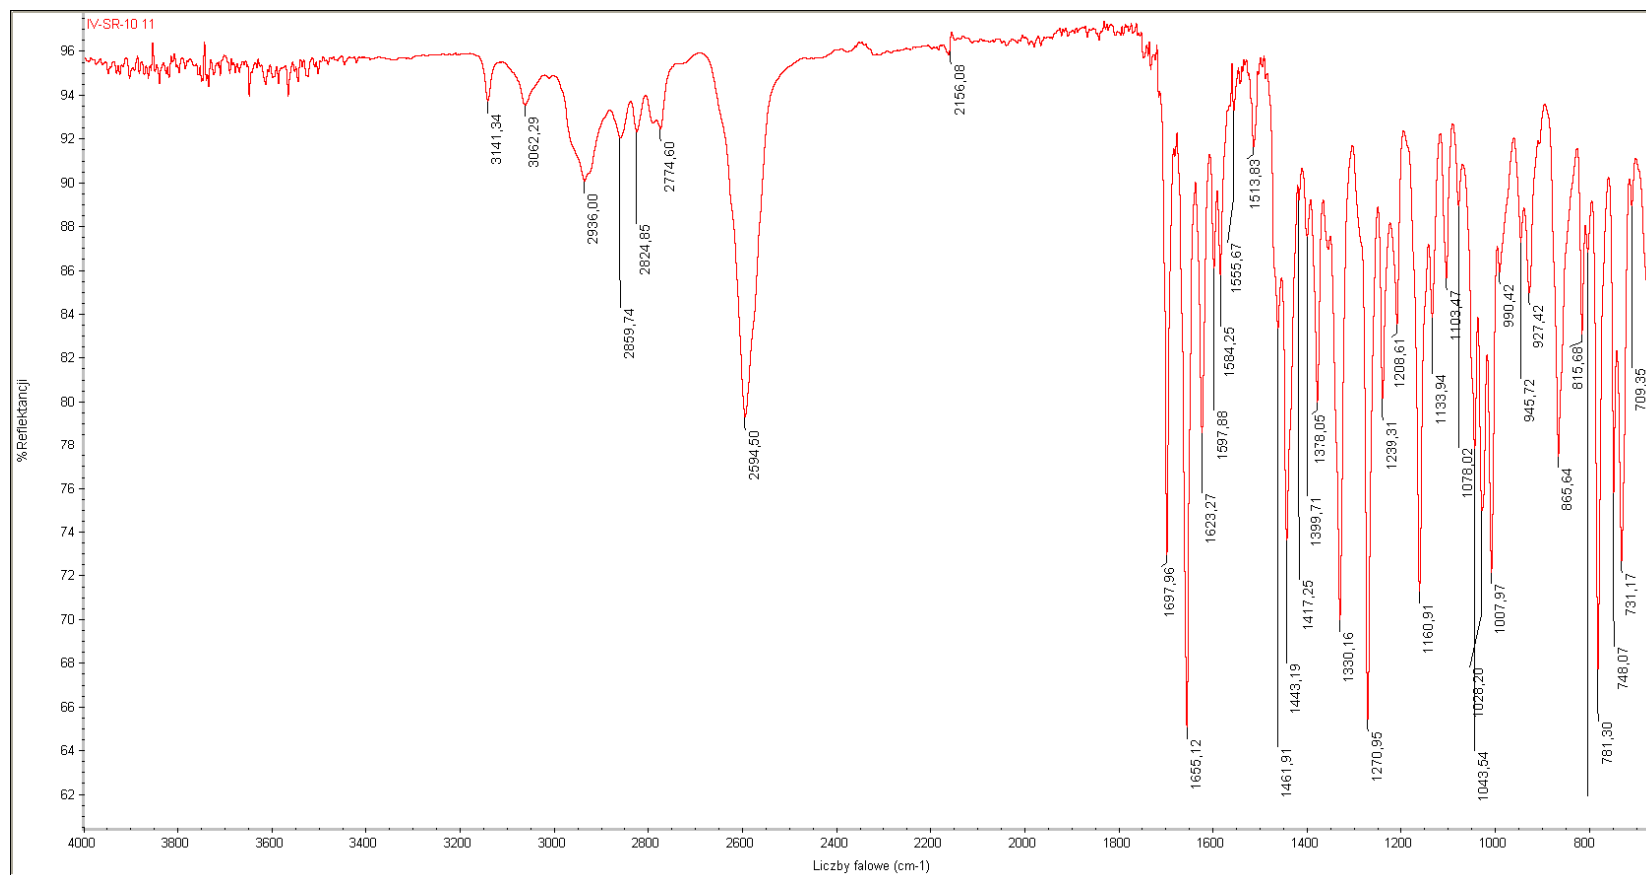

Figure S76. IR spectrum of 19.

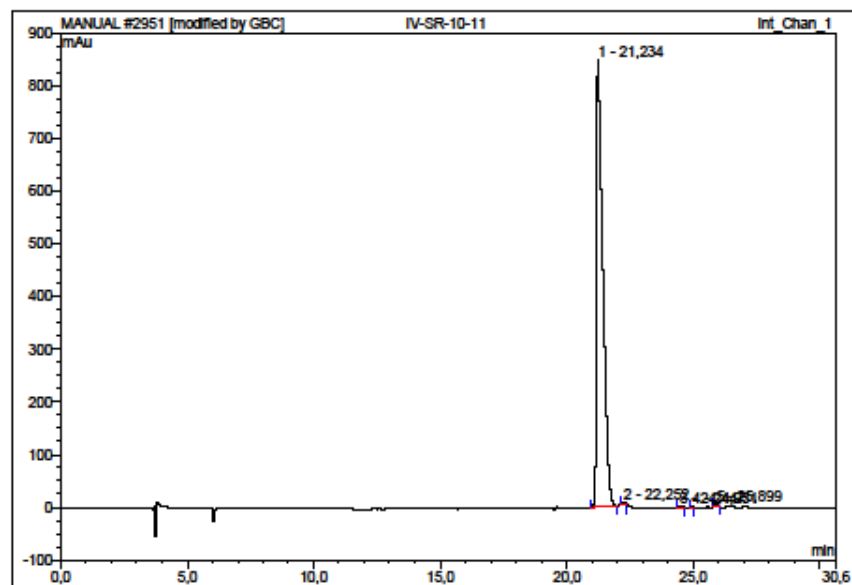

| No.           | Ret.Time<br>min | Peak Name | Height<br>mAu | Area<br>mAu*min | Rel.Area<br>% | Amount | Type |
|---------------|-----------------|-----------|---------------|-----------------|---------------|--------|------|
| 1             | 21,23           | n.a.      | 849,952       | 248,891         | 99,30         | n.a.   | BMB  |
| 2             | 22,25           | n.a.      | 4,583         | 0,672           | 0,27          | n.a.   | BM * |
| 3             | 24,45           | n.a.      | 1,821         | 0,243           | 0,10          | n.a.   | BMB* |
| 4             | 24,95           | n.a.      | 2,623         | 0,272           | 0,11          | n.a.   | BMB* |
| 5             | 25,90           | n.a.      | 4,032         | 0,565           | 0,23          | n.a.   | BMB* |
| <b>Total:</b> |                 |           | 863,010       | 250,642         | 100,00        | 0,000  |      |

Figure S77. HPLC analysis of 19.

Spectrum Name: IV-SR-10\_11\_PT  
Start Ion: 400  
End Ion: 700  
Source: APCI + 10.0µA 400C  
Capillary: 150V 300C Offset: 25V Span: 0V

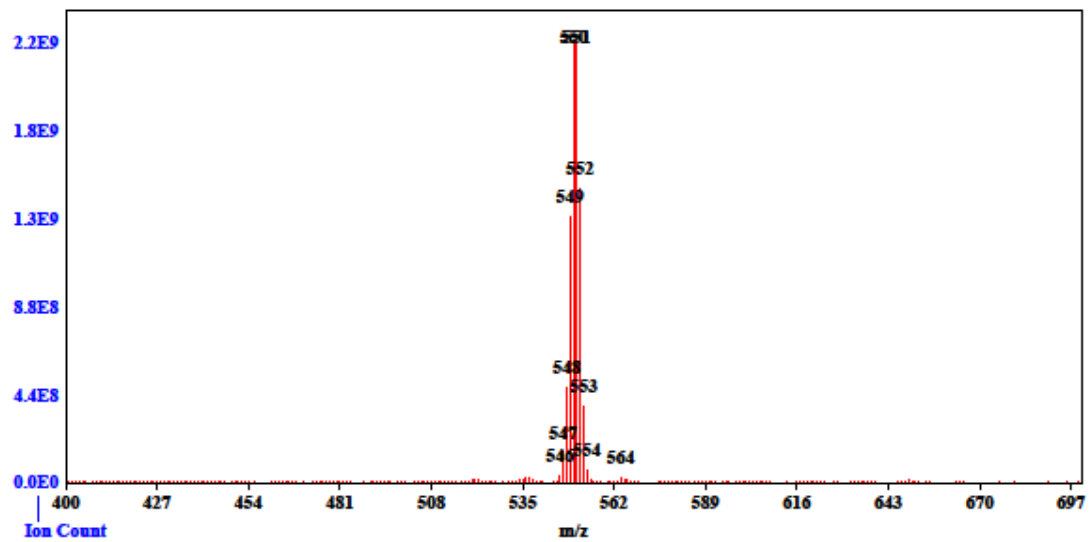

Figure S78. MS spectrum of 19.

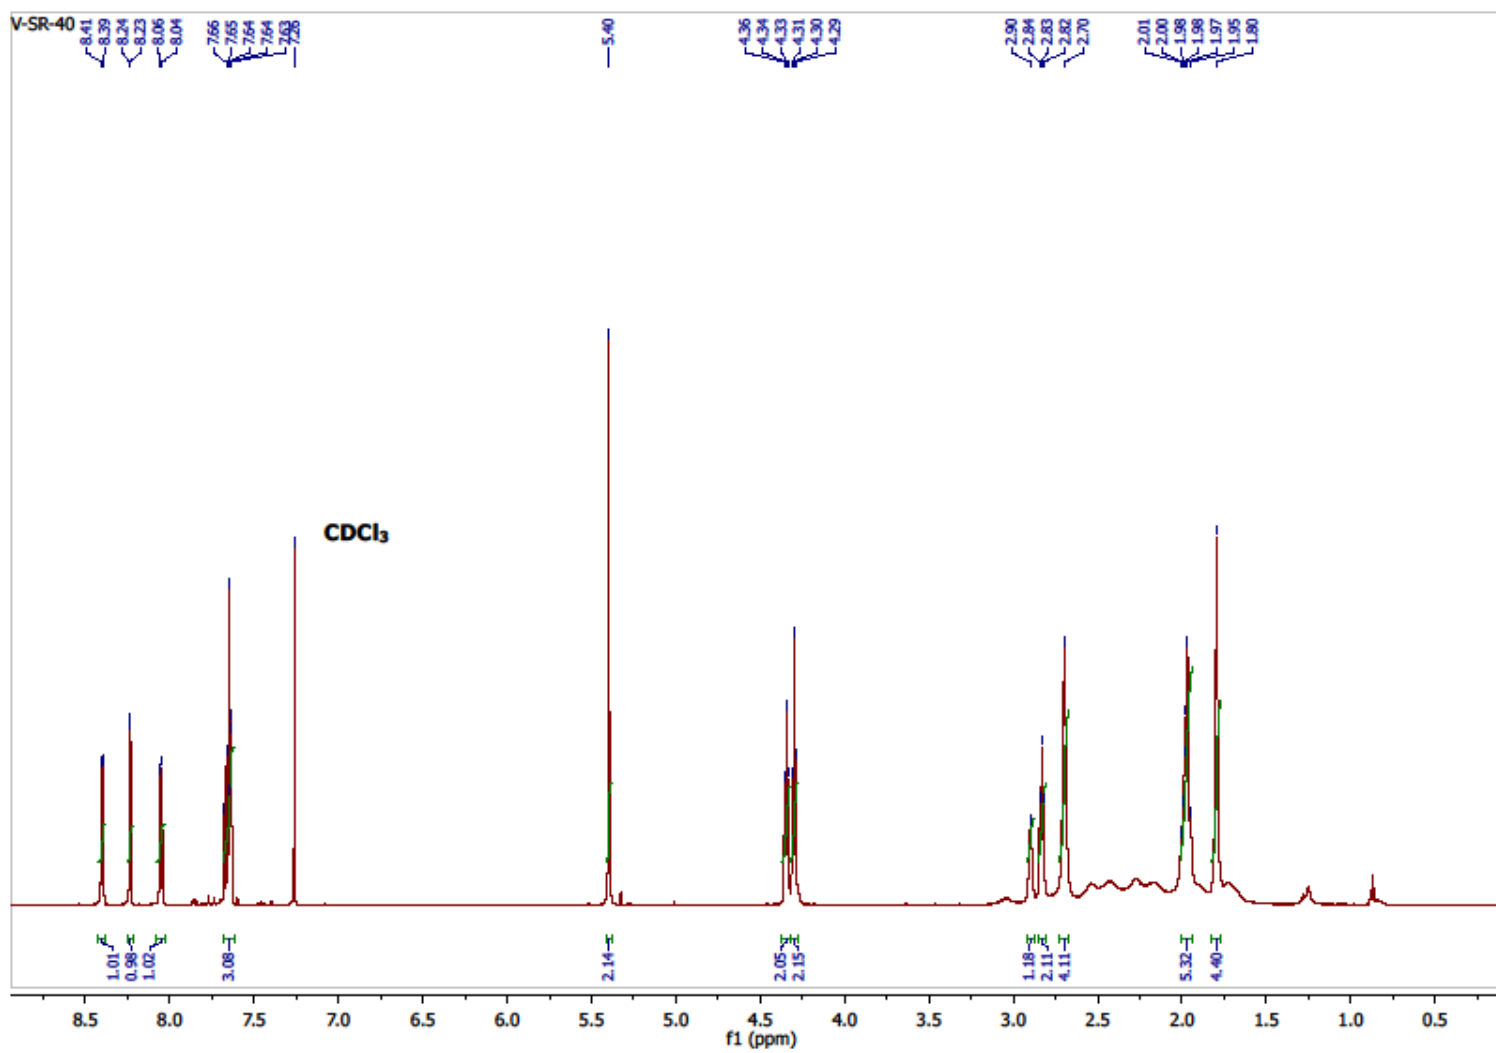

Figure S79. <sup>1</sup>H NMR spectrum of 20.

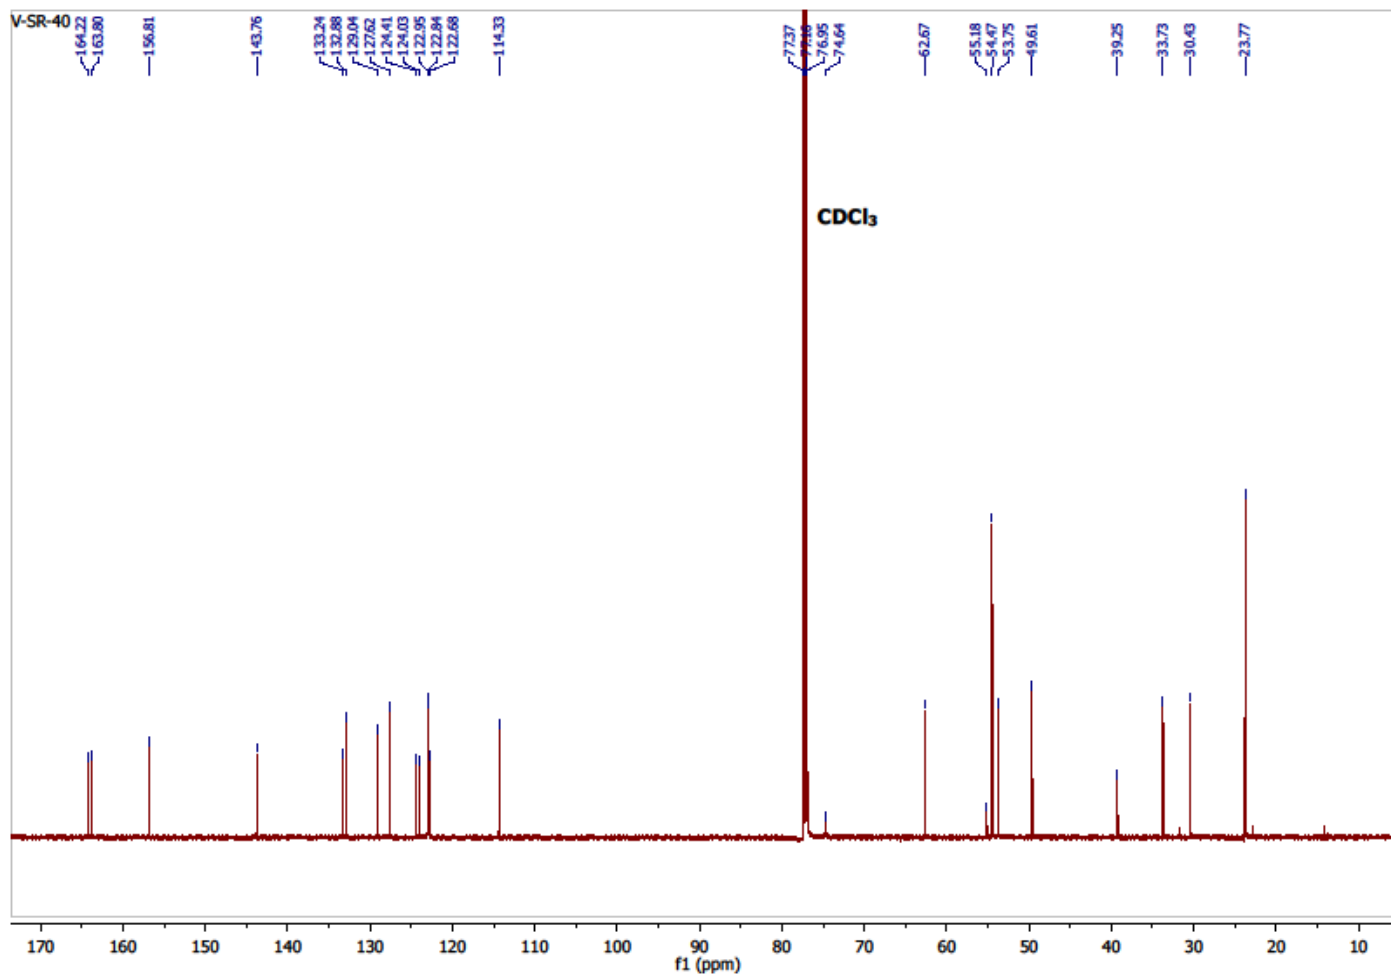

Figure S80. <sup>13</sup>C NMR spectrum of 20.

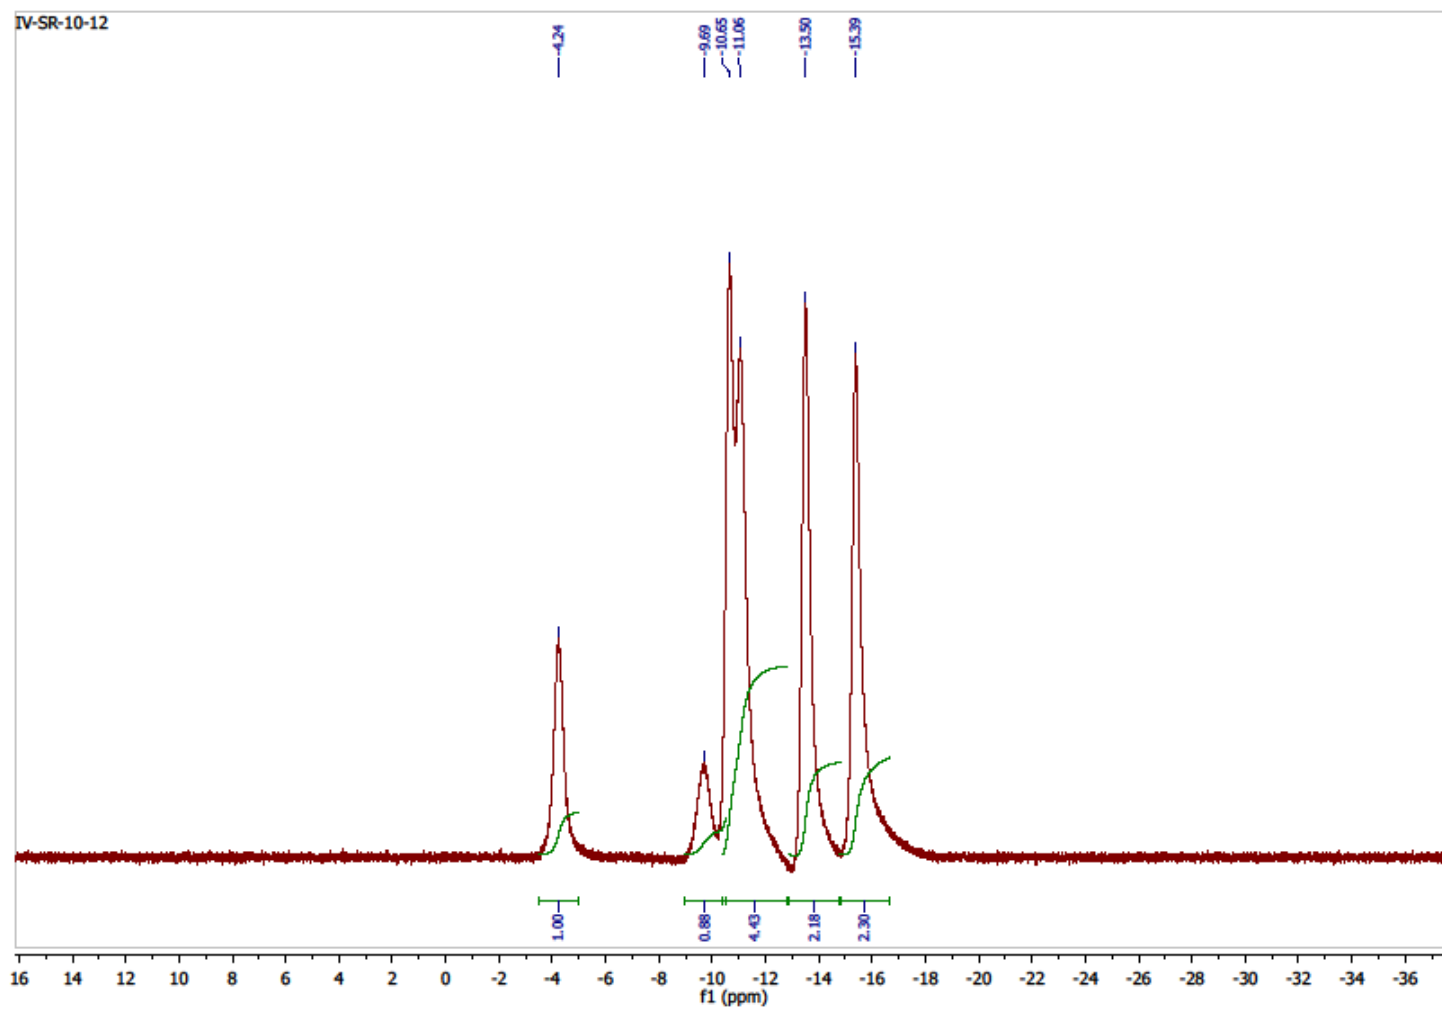

Figure S81.  $^{11}\text{B}$  NMR  $\{^1\text{H BB}\}$  spectrum of 20.

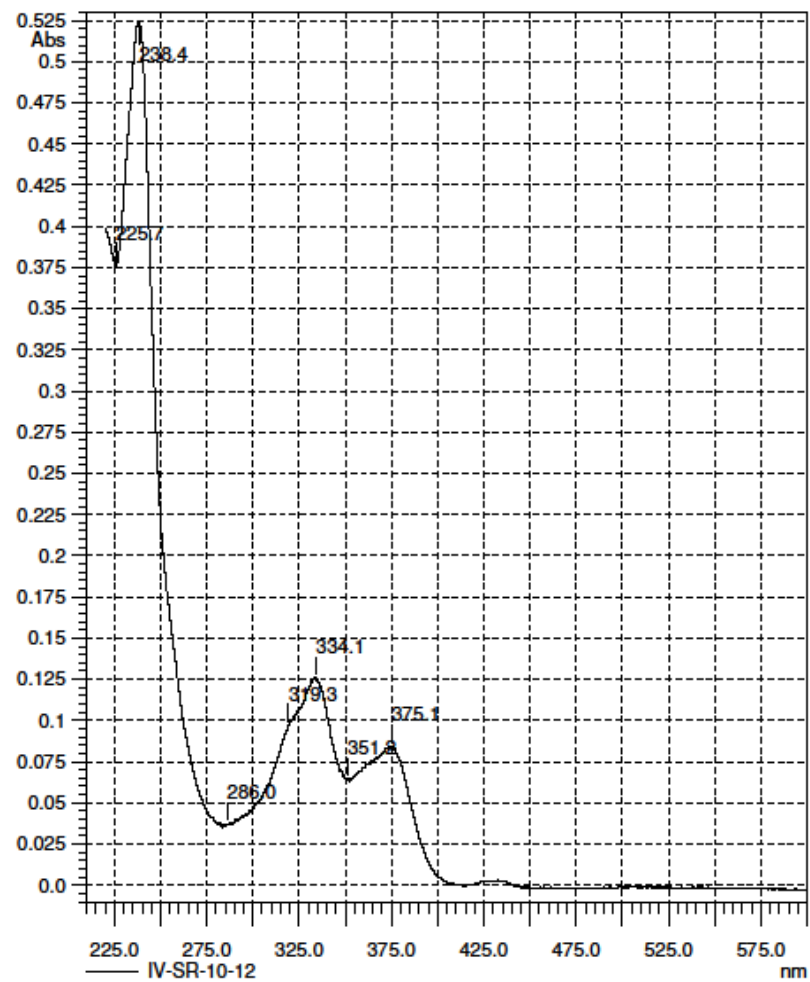

Figure S82. UV spectrum of 20.



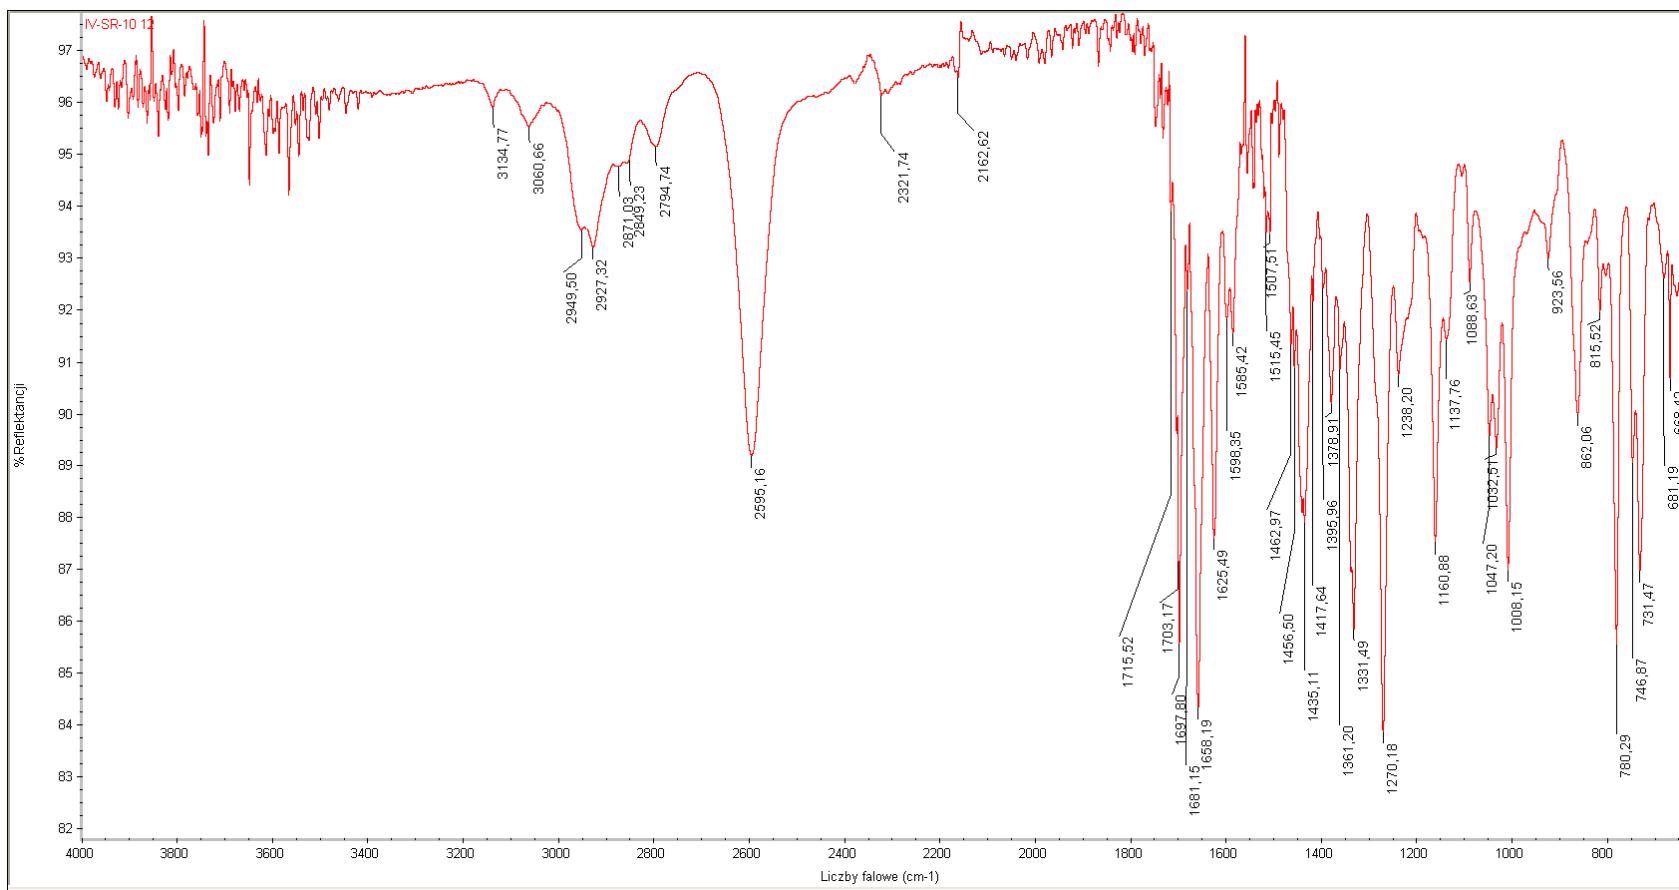

Figure S83. IR spectrum of 20.

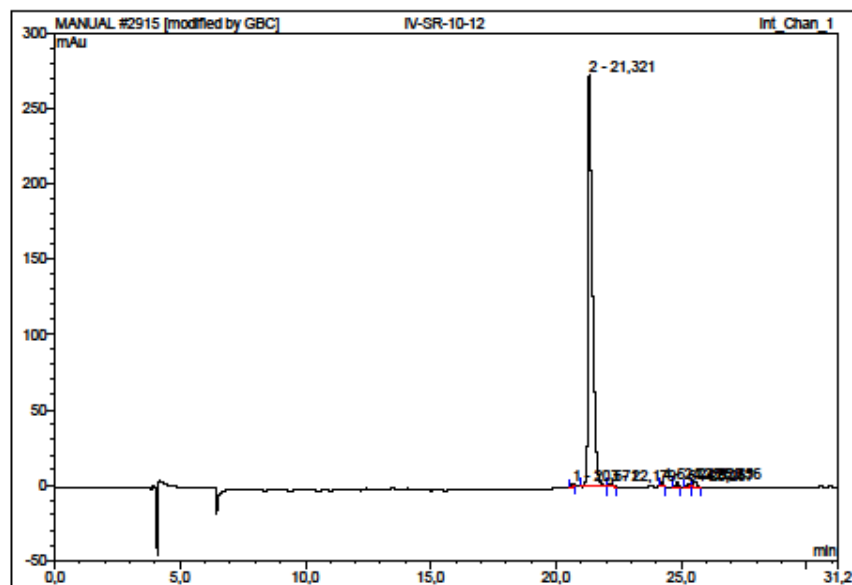

| No.           | Ret.Time<br>min | Peak Name | Height<br>mAu | Area<br>mAu*min | Rel.Area<br>% | Amount | Type |
|---------------|-----------------|-----------|---------------|-----------------|---------------|--------|------|
| 1             | 20,67           | n.a.      | 2,378         | 0,234           | 0,40          | n.a.   | BMB* |
| 2             | 21,32           | n.a.      | 272,962       | 56,512          | 96,19         | n.a.   | BMB* |
| 3             | 22,18           | n.a.      | 1,980         | 0,368           | 0,62          | n.a.   | BMB* |
| 4             | 24,25           | n.a.      | 2,976         | 0,288           | 0,49          | n.a.   | BMB* |
| 5             | 24,82           | n.a.      | 2,954         | 0,408           | 0,69          | n.a.   | BMB* |
| 6             | 25,27           | n.a.      | 2,065         | 0,283           | 0,48          | n.a.   | BMB* |
| 7             | 25,56           | n.a.      | 3,923         | 0,659           | 1,12          | n.a.   | bMB* |
| <b>Total:</b> |                 |           | 289,235       | 58,748          | 100,00        | 0,000  |      |

Figure S84. HPLC analysis of 20.

Spectrum Name: IV-SR-10\_12\_PT  
Start Ion: 500  
End Ion: 700  
Source: APCI + 10.0µA 400C  
Capillary: 150V 300C Offset: 25V Span: 0V

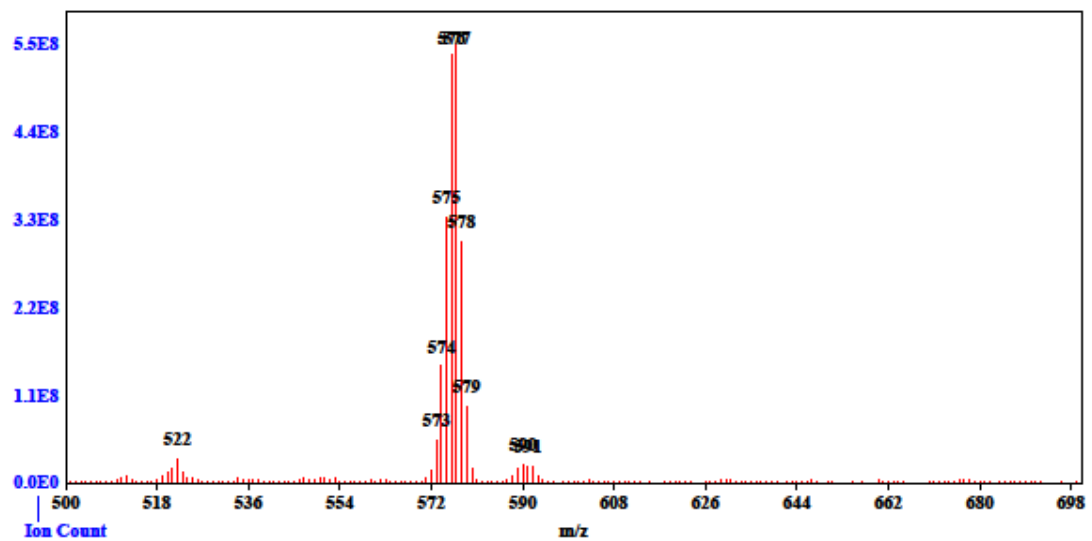

Figure S85. MS spectrum of 20.

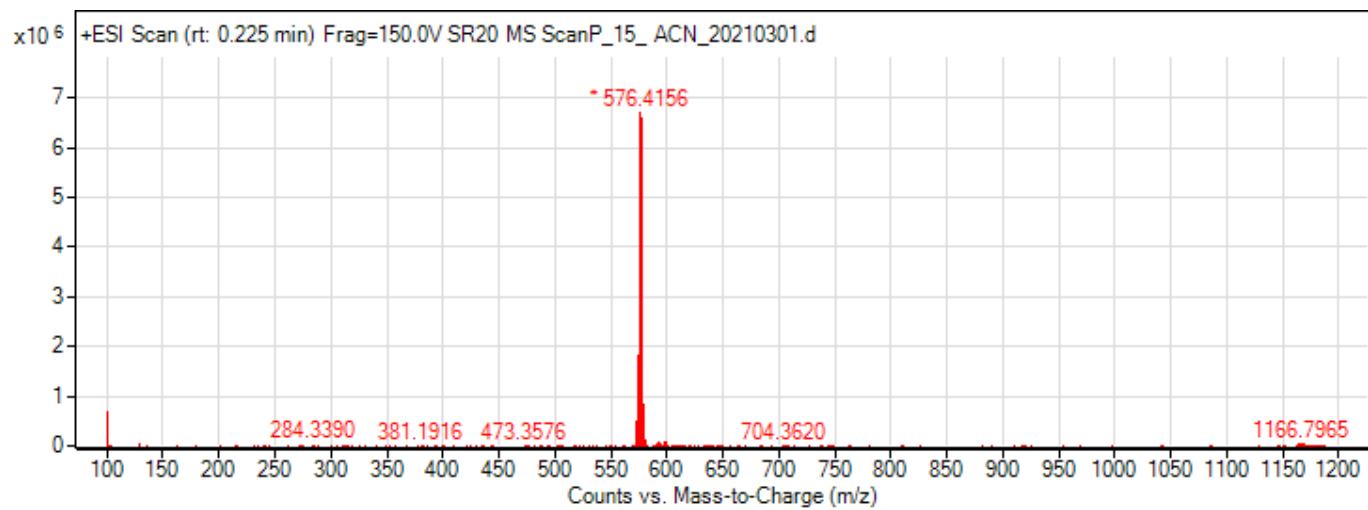

Figure S86. HRMS spectrum of 20.

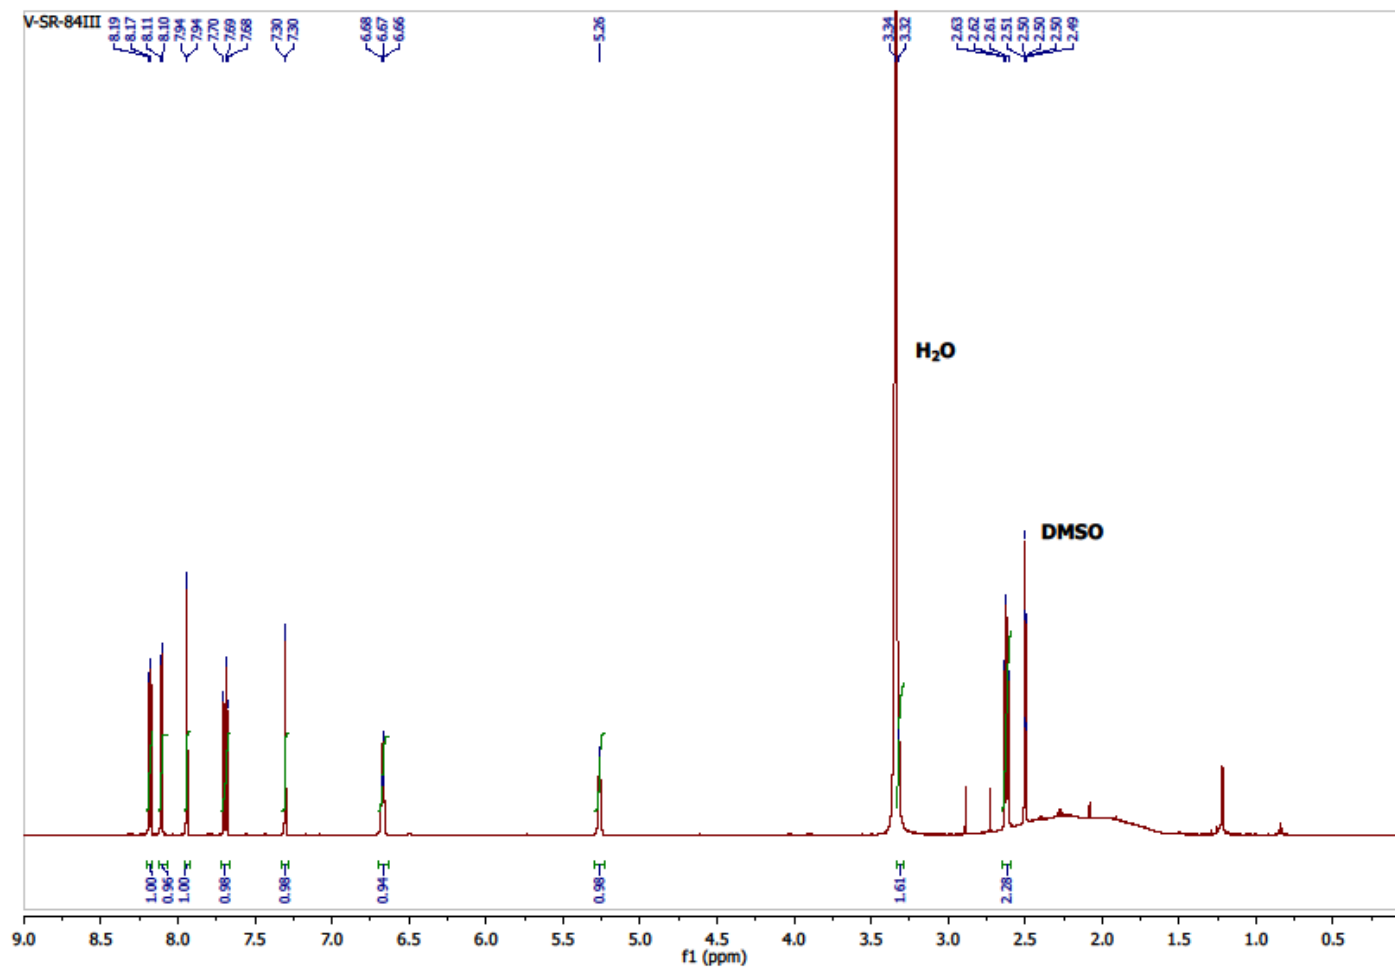

Figure S87. <sup>1</sup>H NMR spectrum of 31.

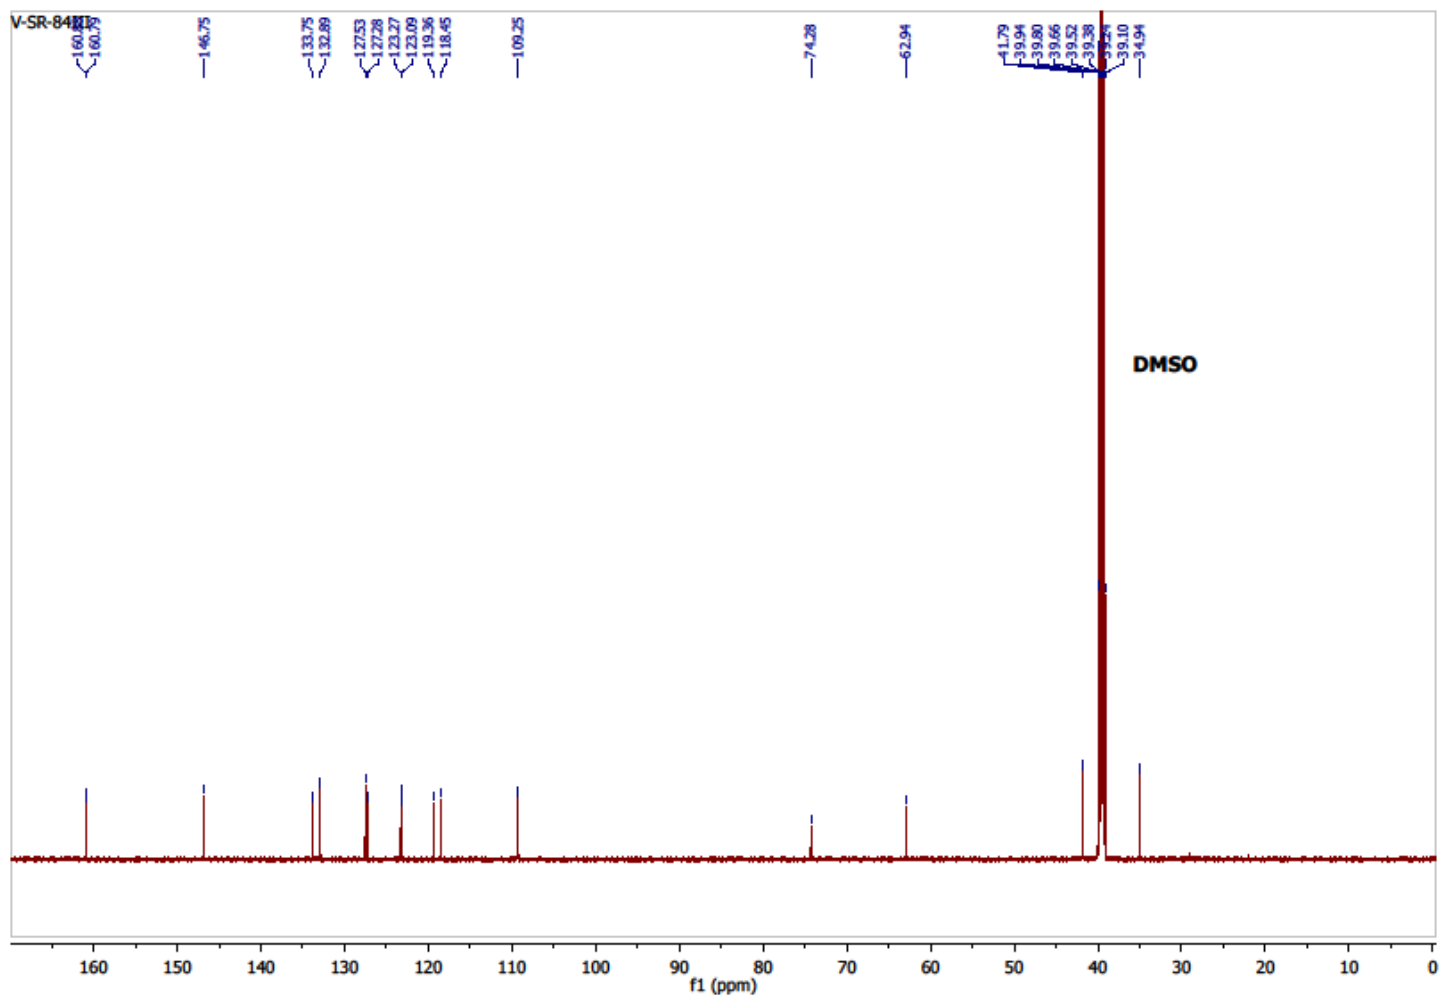

Figure S88.  $^{13}\text{C}$  NMR spectrum of 31.

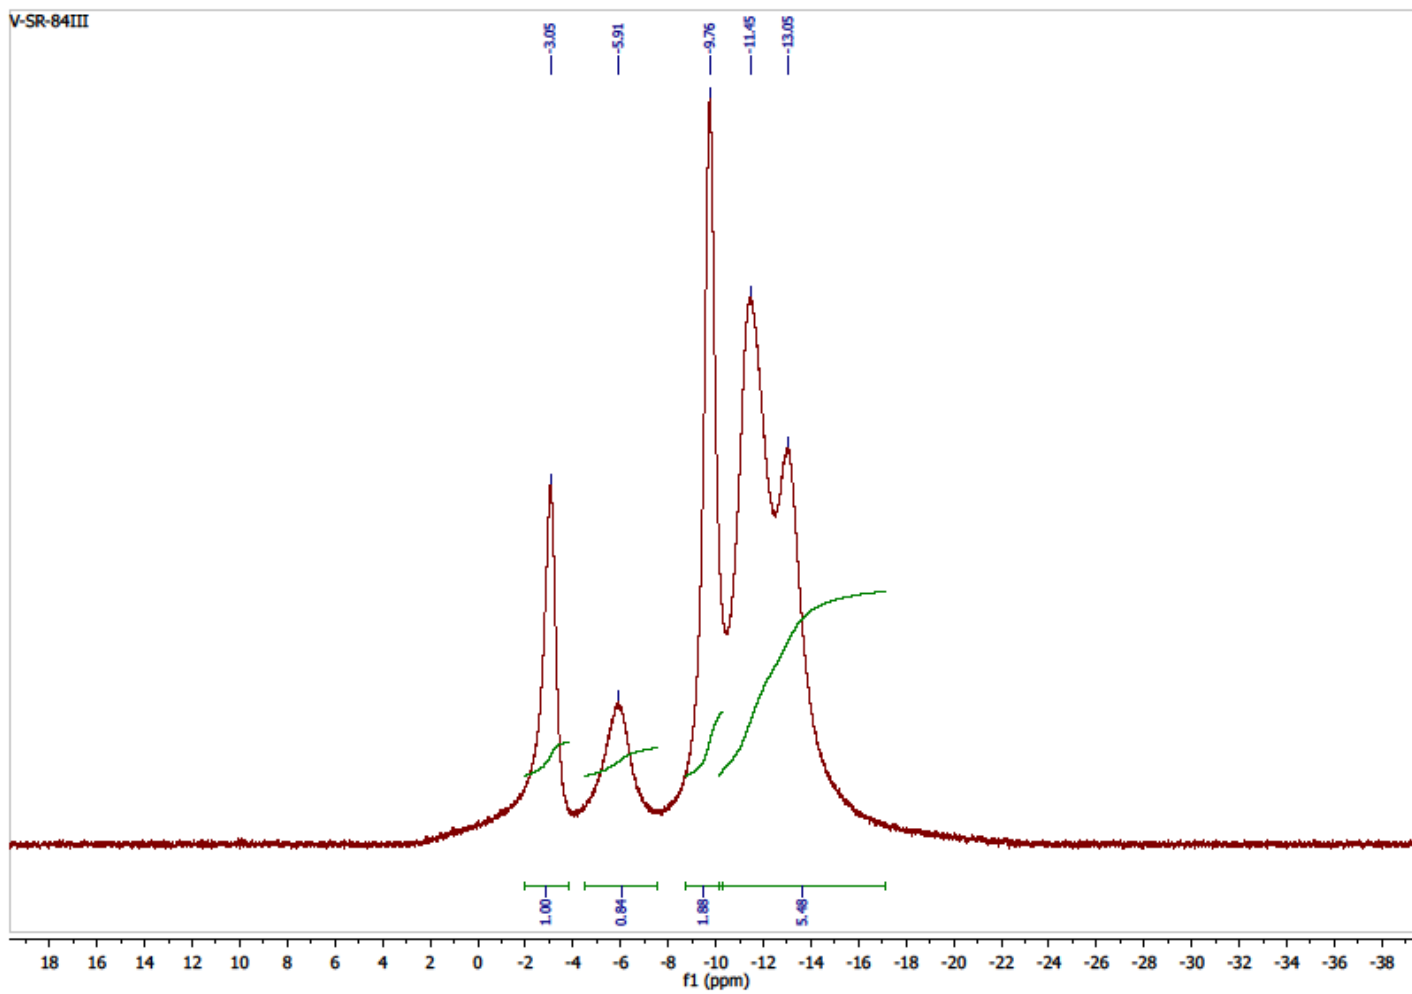

Figure S89.  $^{11}\text{B}$  NMR  $\{^1\text{H BB}\}$  spectrum of 31.

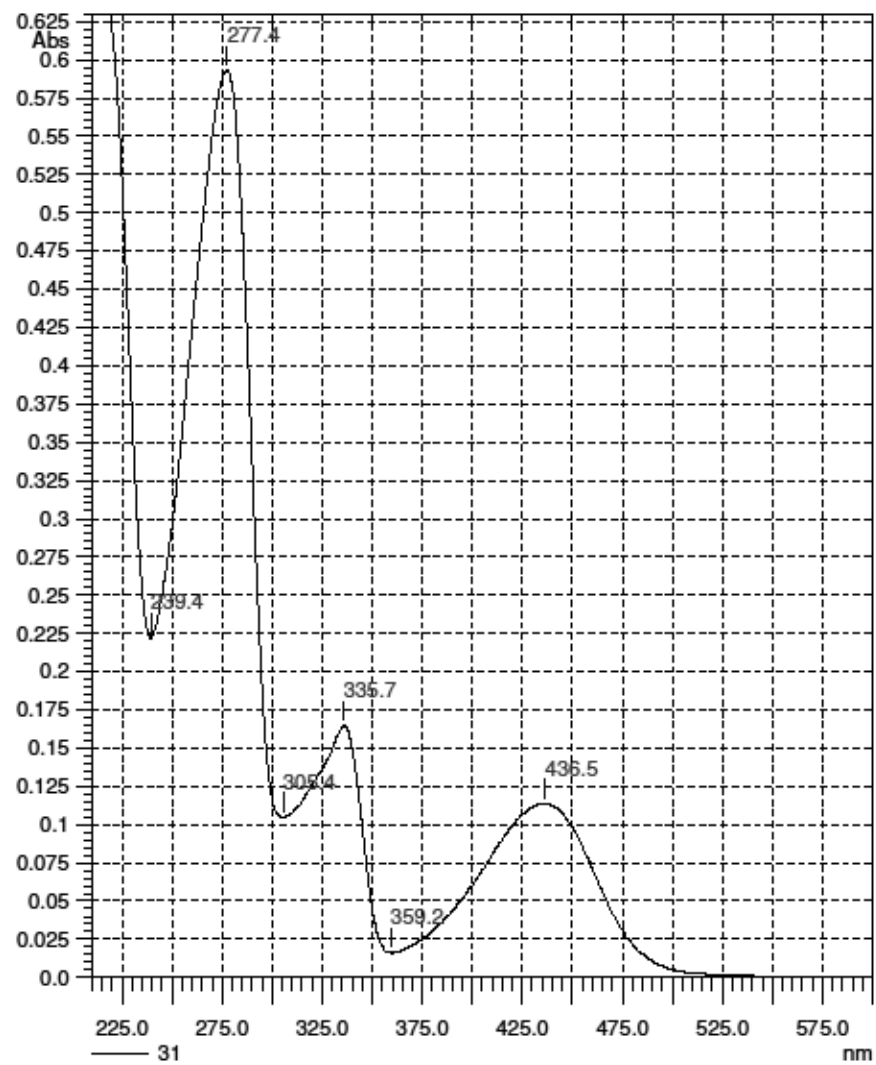

Figure S90. UV spectrum of 31.



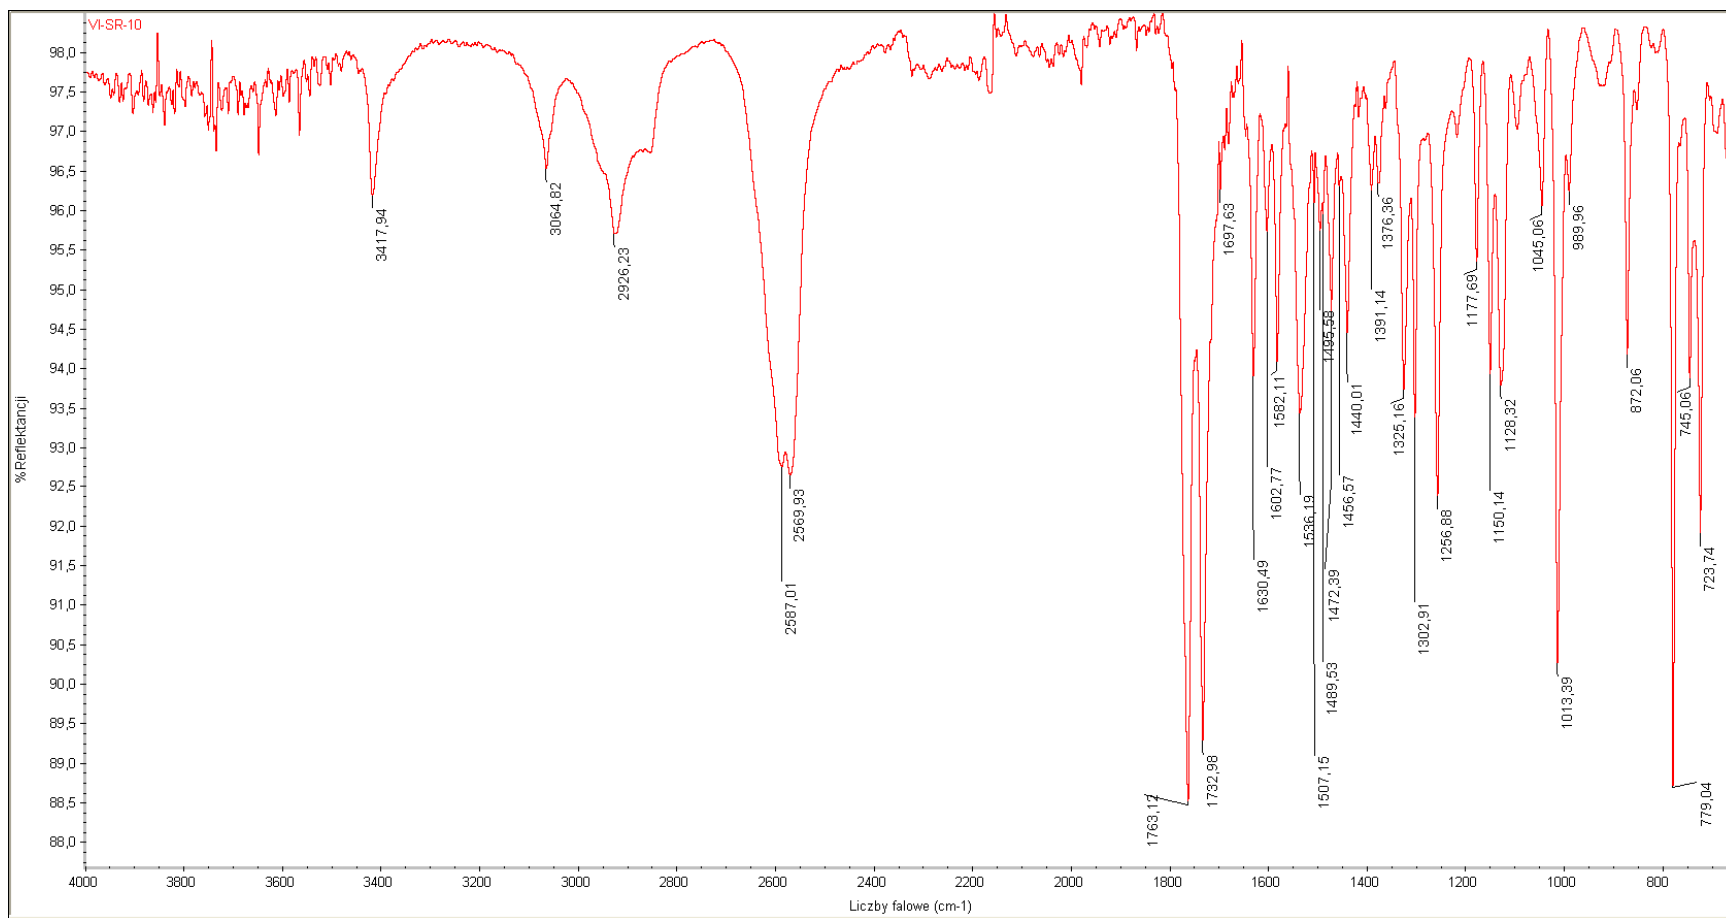

Figure S91. IR spectrum of 31.

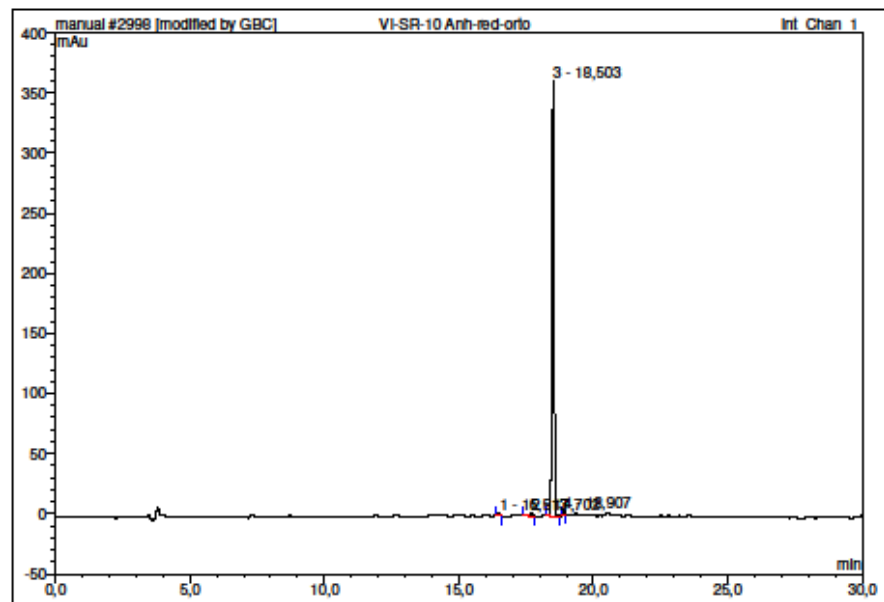

| No.           | Ret. Time<br>min | Peak Name | Height<br>mAu  | Area<br>mAu*min | Rel. Area<br>% | Amount       | Type |
|---------------|------------------|-----------|----------------|-----------------|----------------|--------------|------|
| 1             | 16,51            | n.a.      | 1,476          | 0,158           | 0,49           | n.a.         | BMB* |
| 2             | 17,70            | n.a.      | 1,962          | 0,465           | 1,44           | n.a.         | BMB* |
| 3             | 18,50            | n.a.      | 361,479        | 31,441          | 97,33          | n.a.         | BMB  |
| 4             | 18,91            | n.a.      | 3,089          | 0,240           | 0,74           | n.a.         | BMB* |
| <b>Total:</b> |                  |           | <b>368,005</b> | <b>32,304</b>   | <b>100,00</b>  | <b>0,000</b> |      |

Figure S92. HPLC analysis of 31.

Spectrum Name: VI-SR-10\_pr  
Start Ion: 300  
End Ion: 500  
Source: APCI + 10.0µA 400C  
Capillary: 180V 300C Offset: 30V Span: 20V

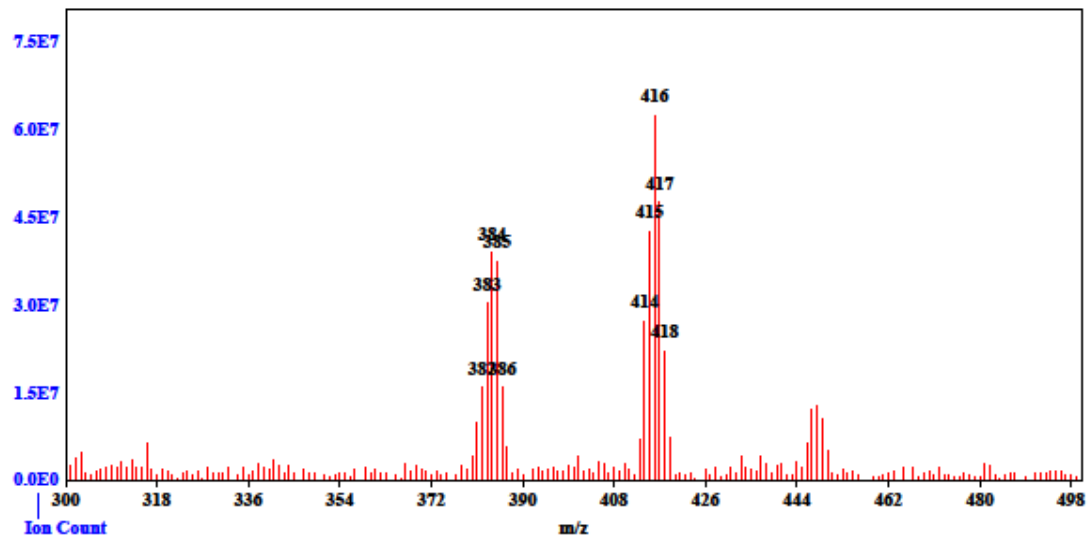

Figure S93. MS spectrum of 31.

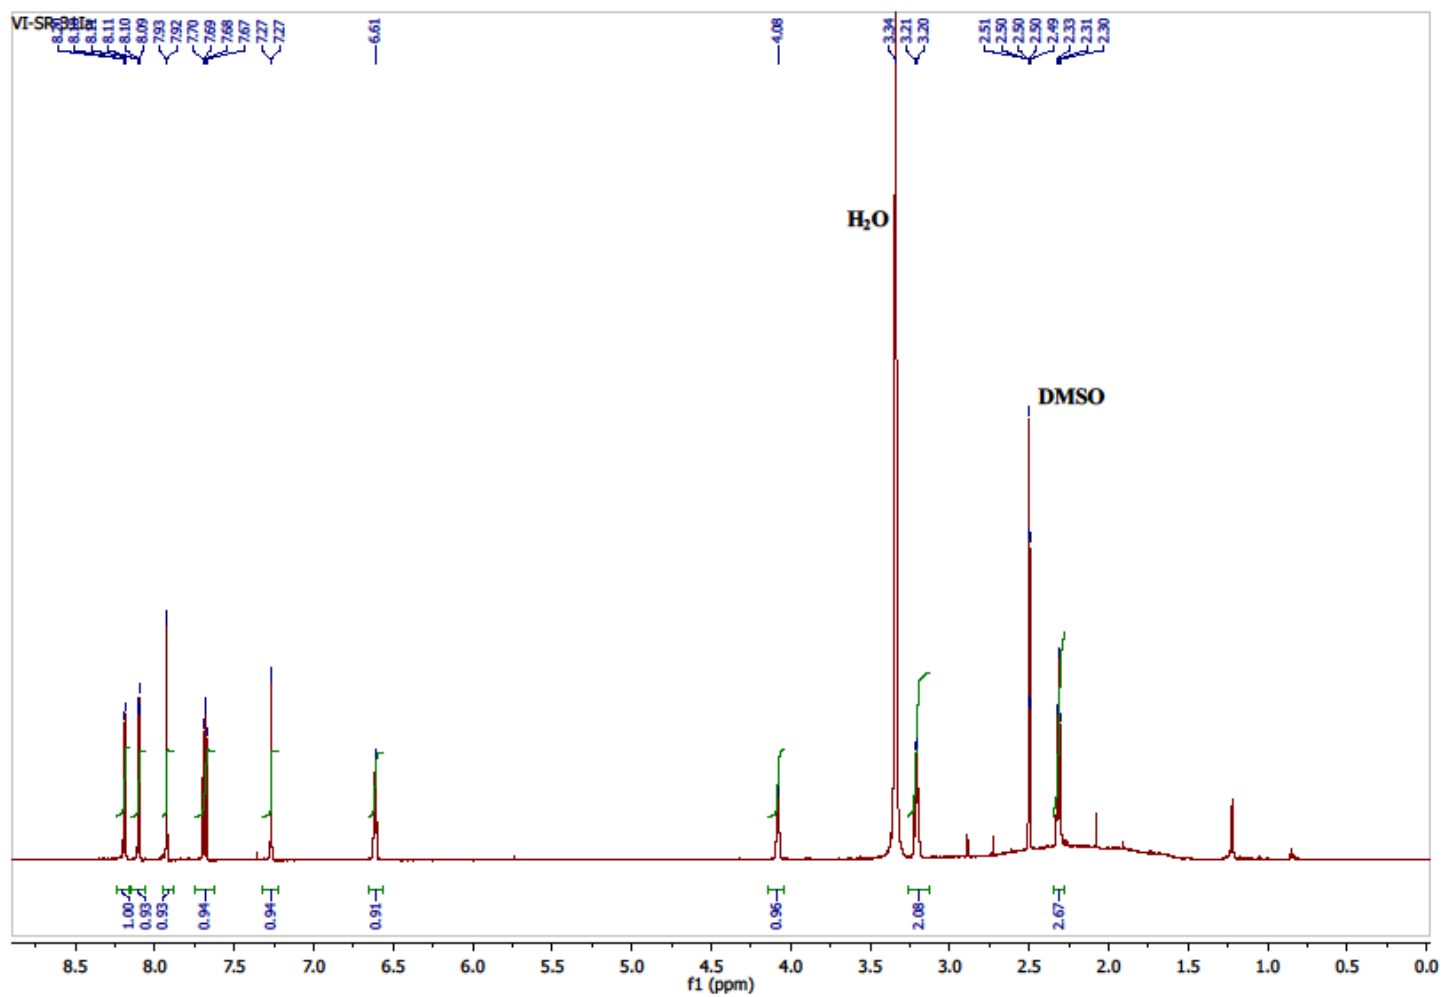

Figure S94. <sup>1</sup>H NMR spectrum of 32.

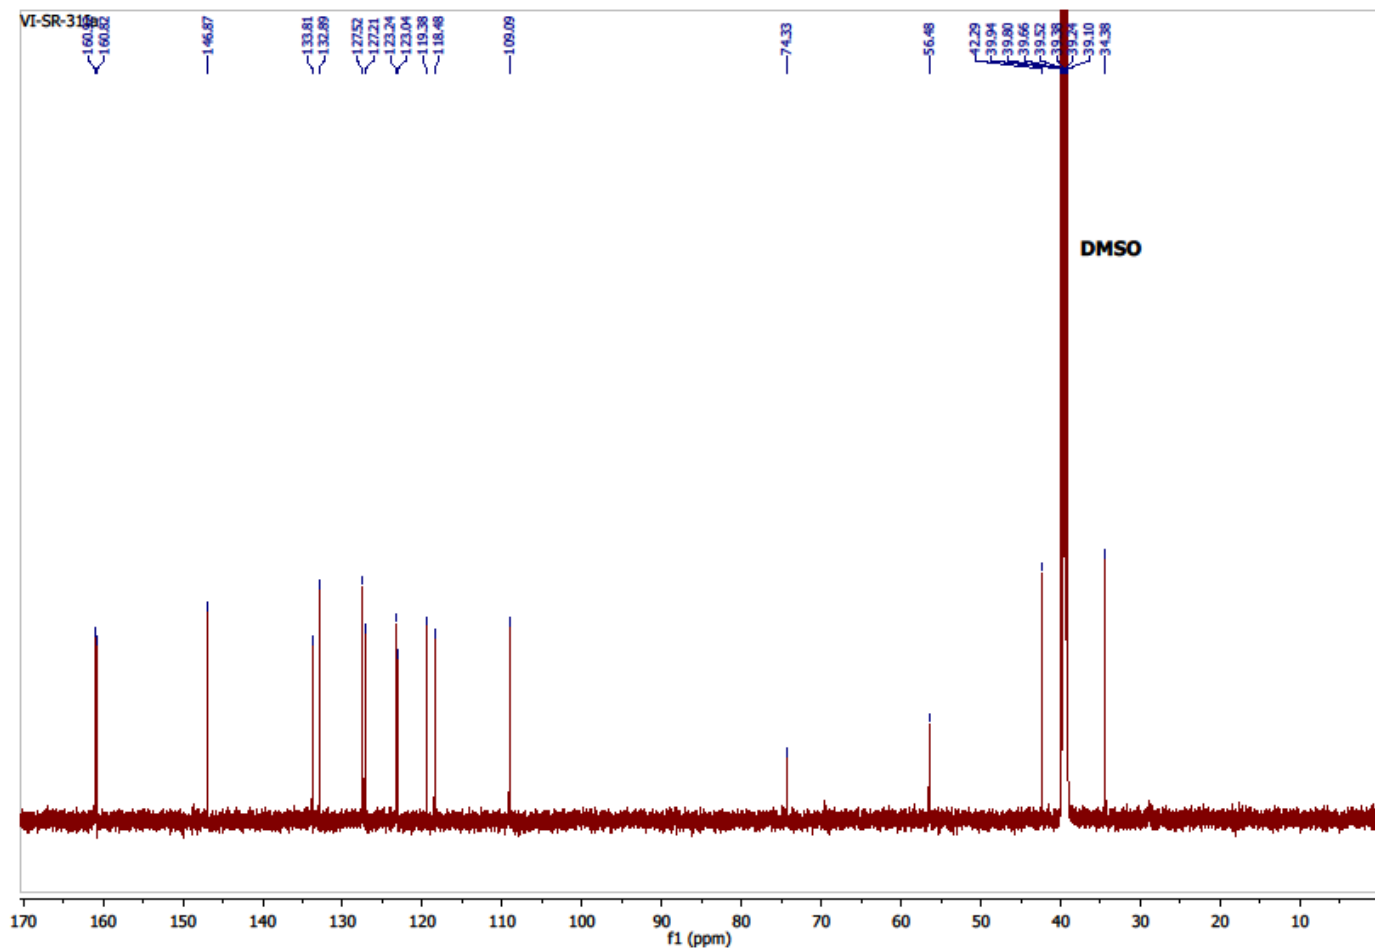

Figure S95.  $^{13}\text{C}$  NMR spectrum of 32.

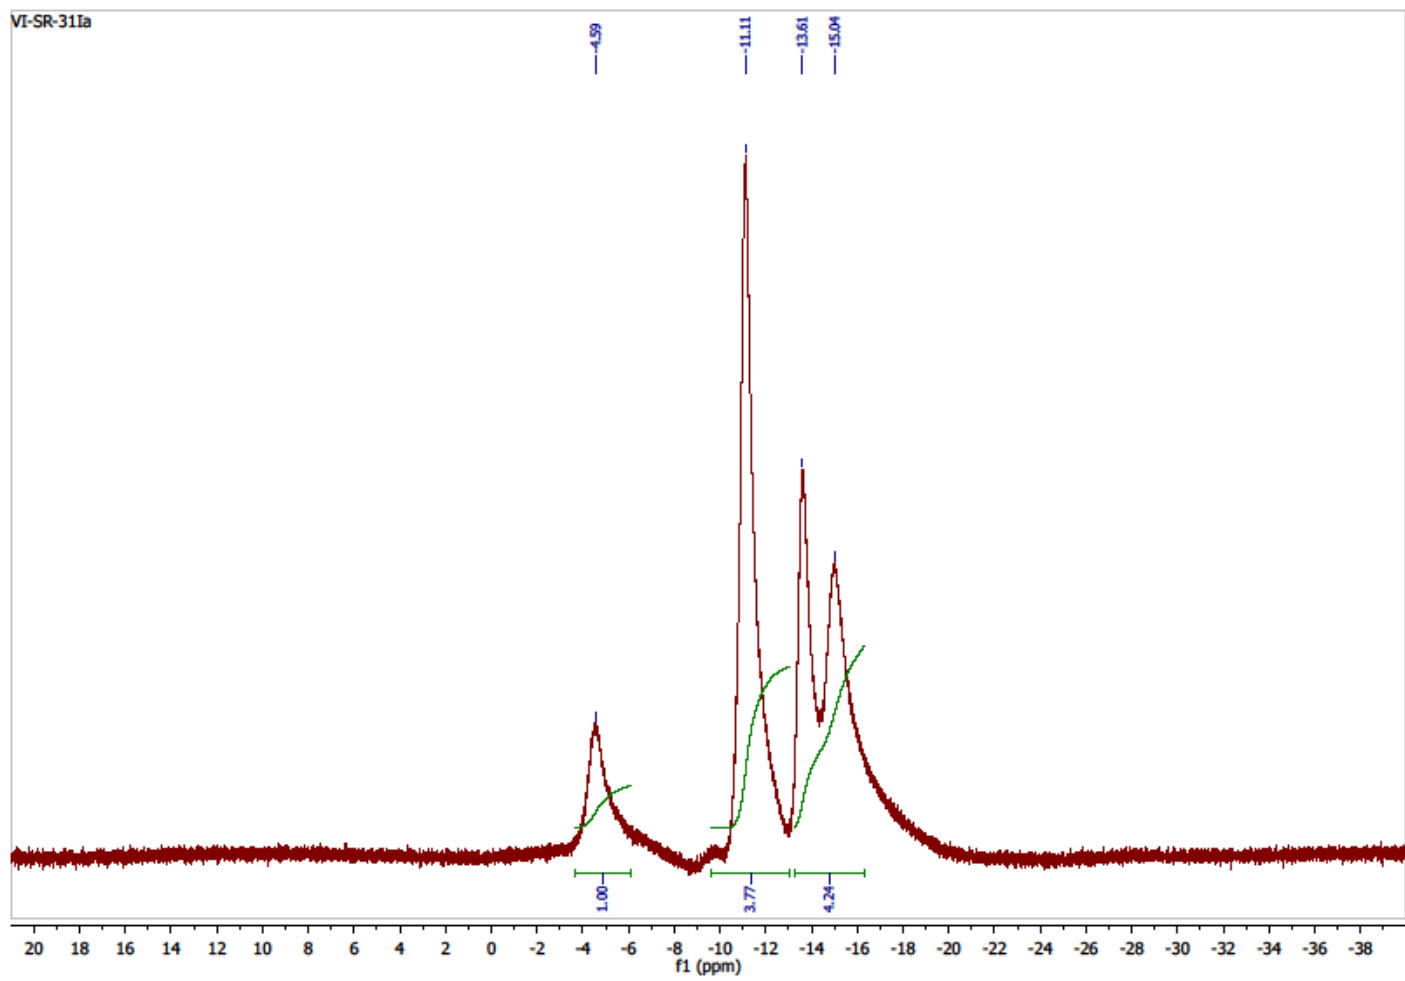

Figure S96.  $^{11}\text{B}$  NMR  $\{^1\text{H BB}\}$  spectrum of 32.

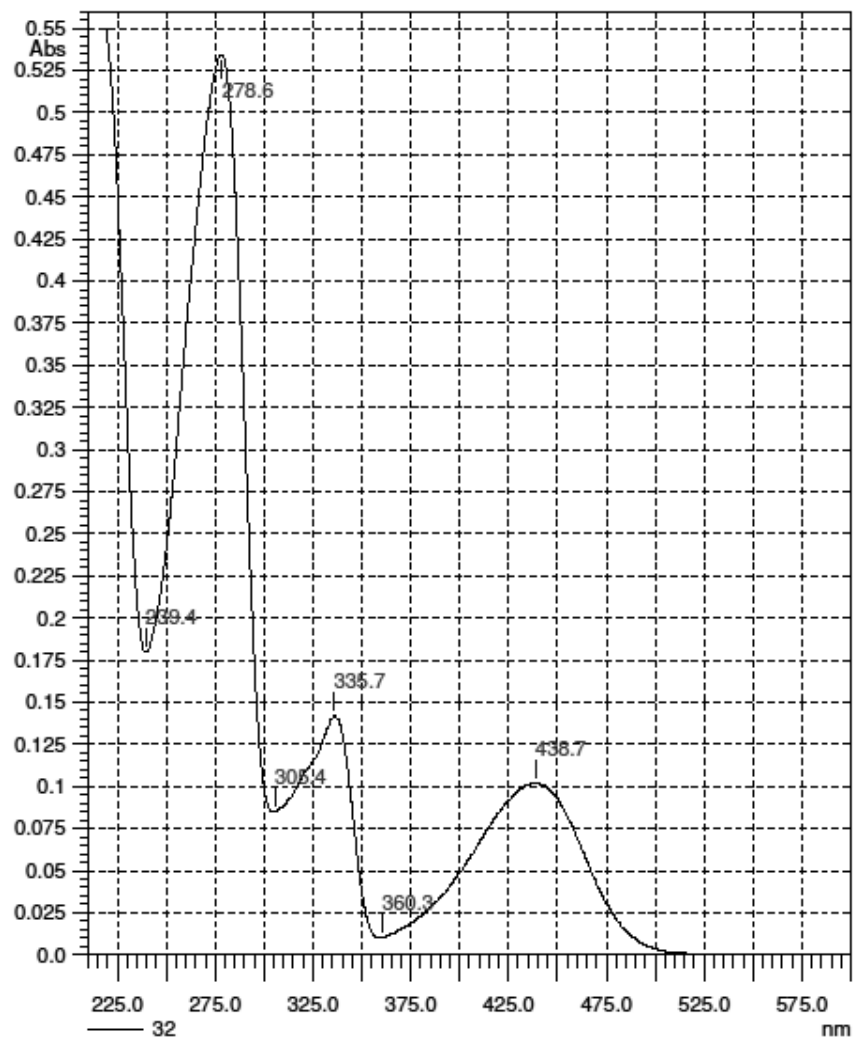

Figure S97. UV spectrum of 32.

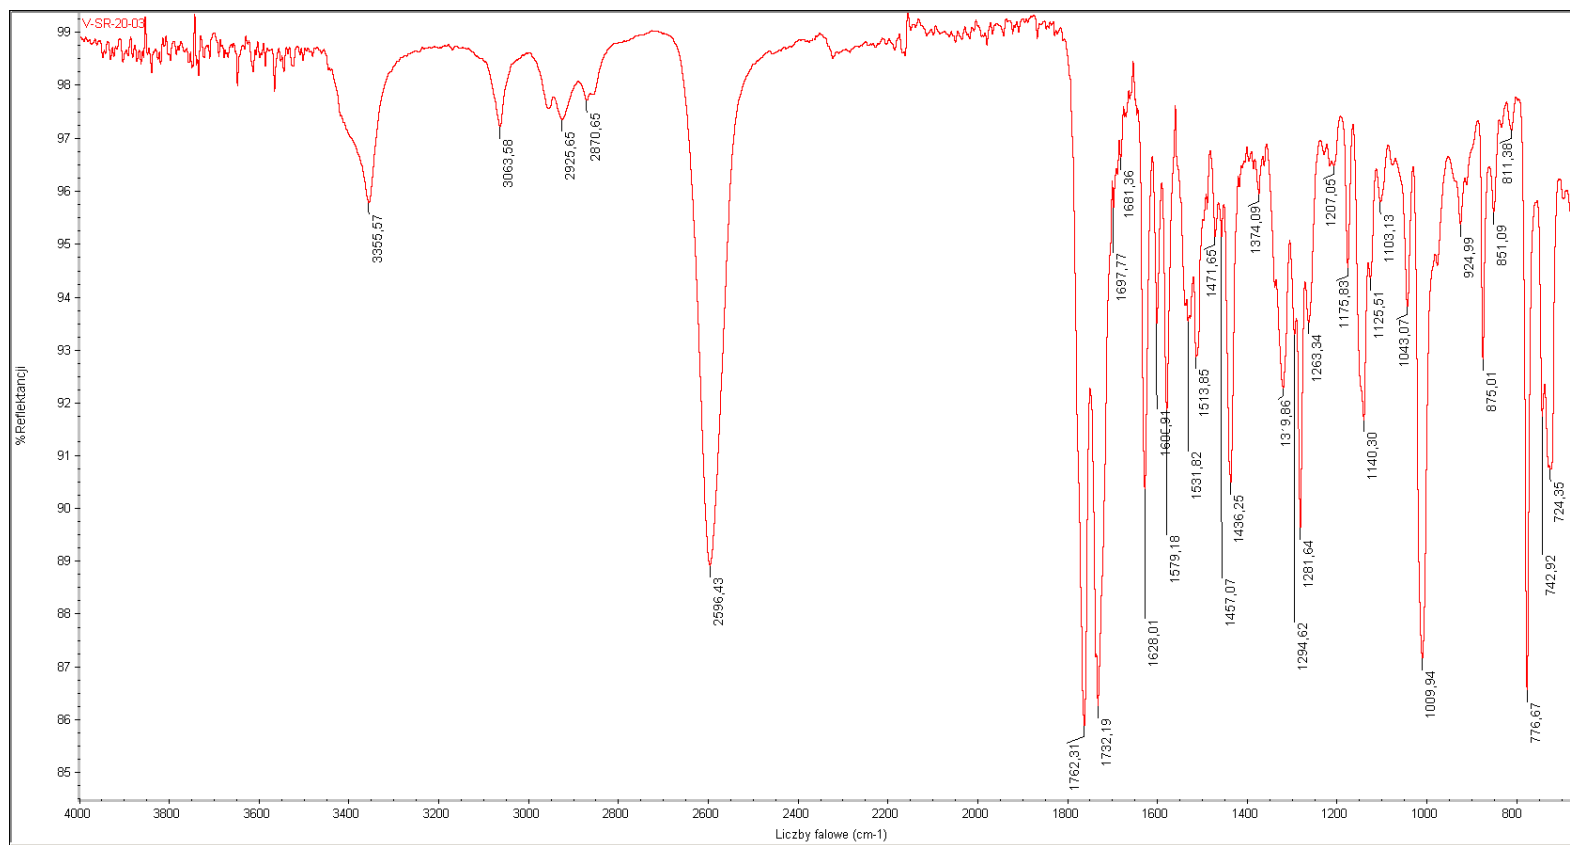

Figure S98. IR spectrum of 32.



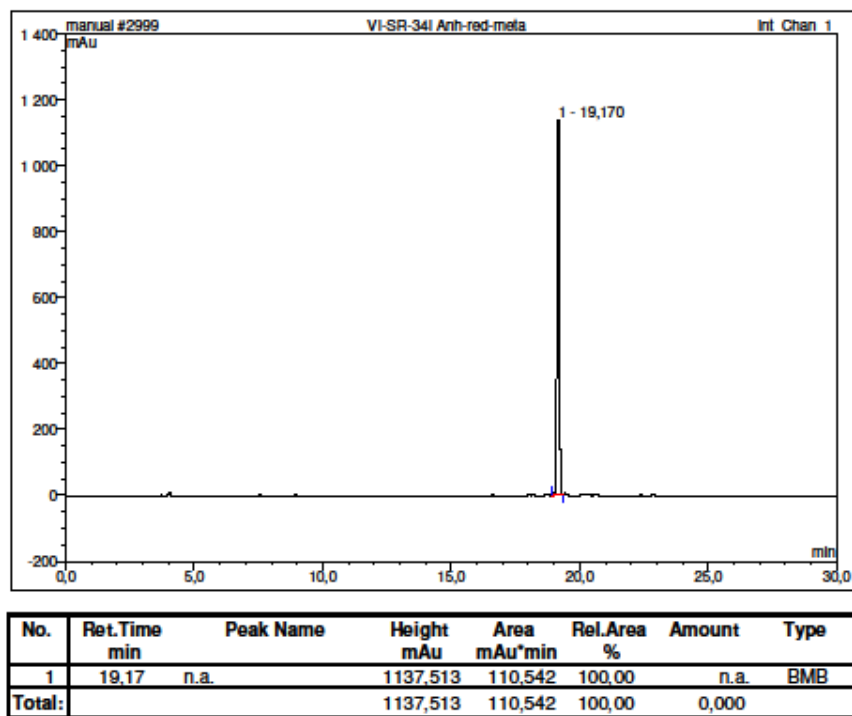

Figure S99. HPLC analysis of 32.

Spectrum Name: V-SR-20-03\_PT  
Start Ion: 300  
End Ion: 500  
Source: APCI + 10.0µA 400C  
Capillary: 150V 300C Offset: 25V Span: 0V

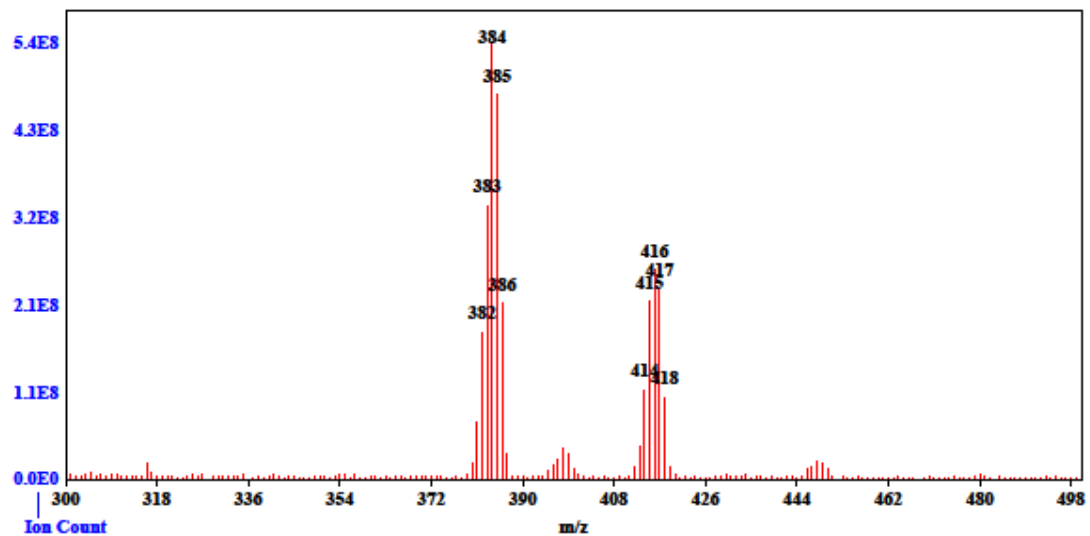

Figure S100. MS spectrum of 32.

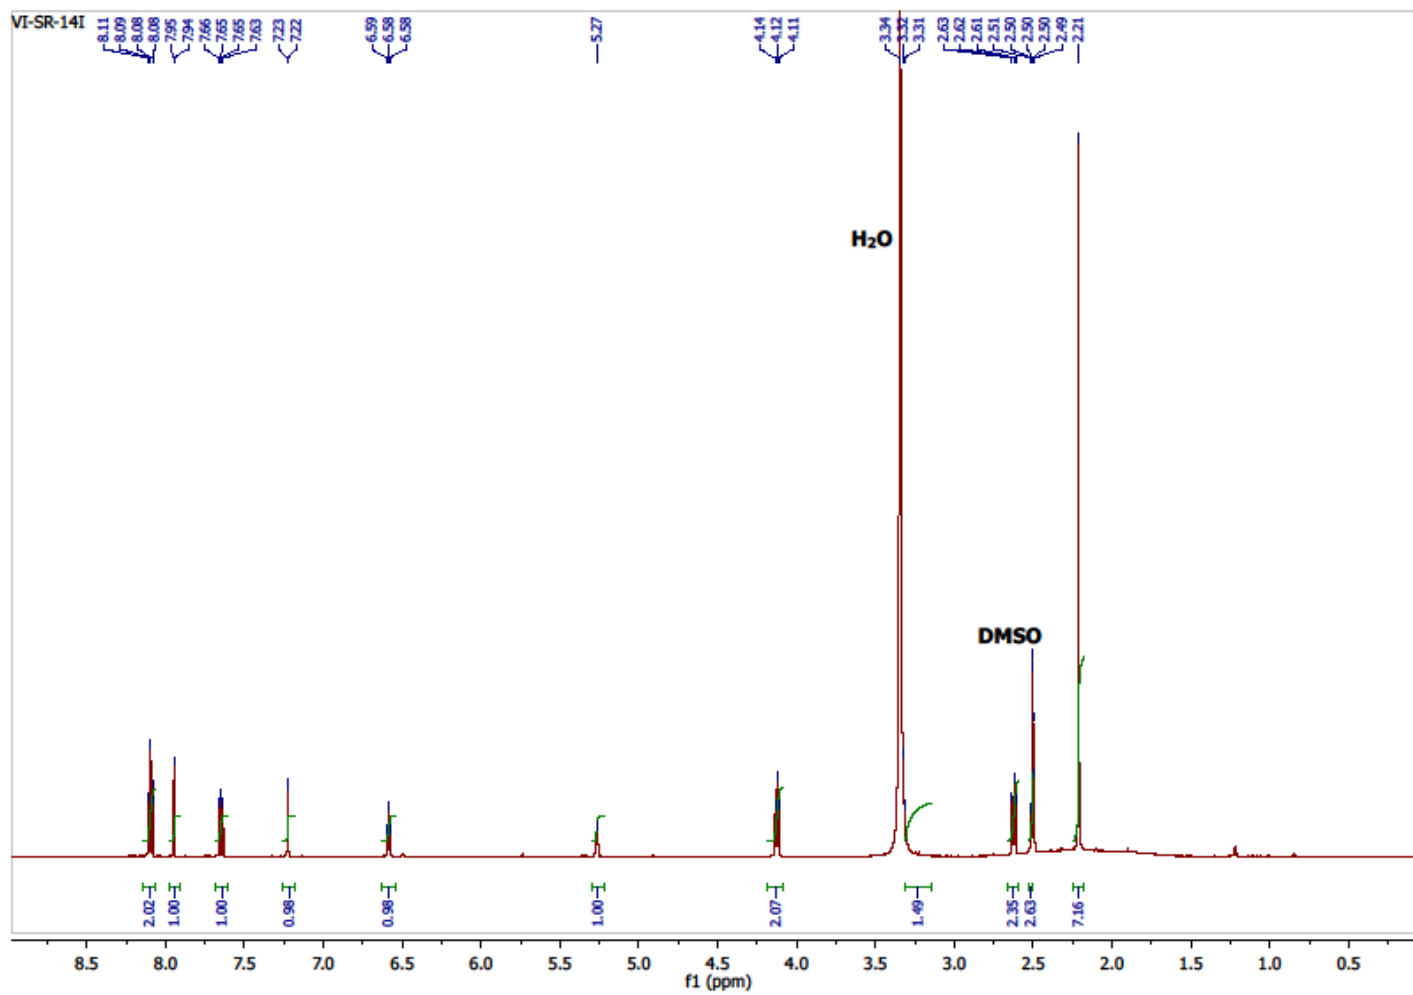

Figure S101. <sup>1</sup>H NMR spectrum of 33.

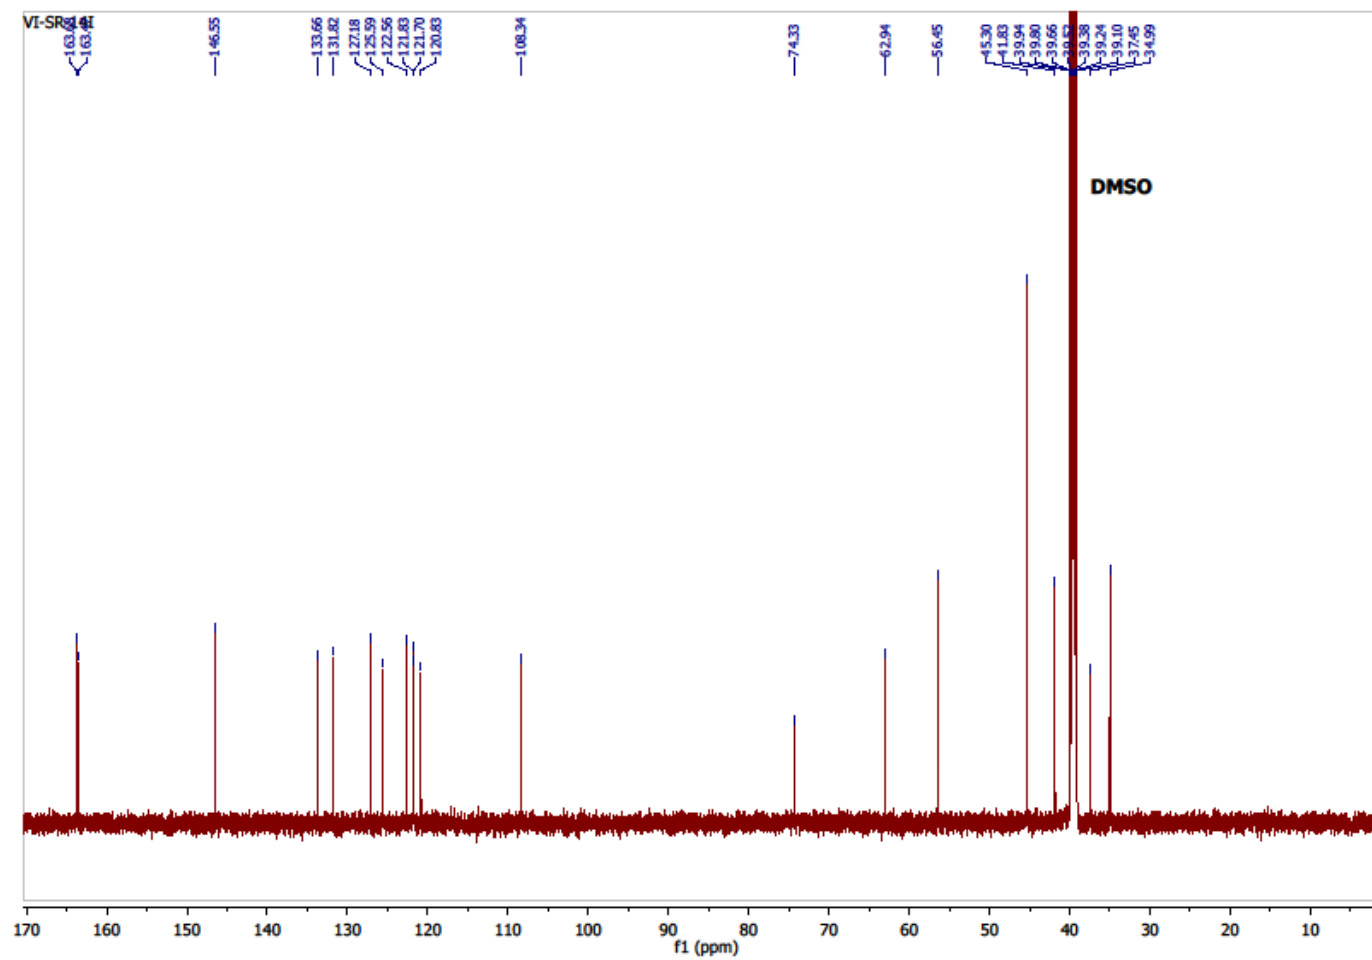

Figure S102.  $^{13}\text{C}$  NMR spectrum of 33.

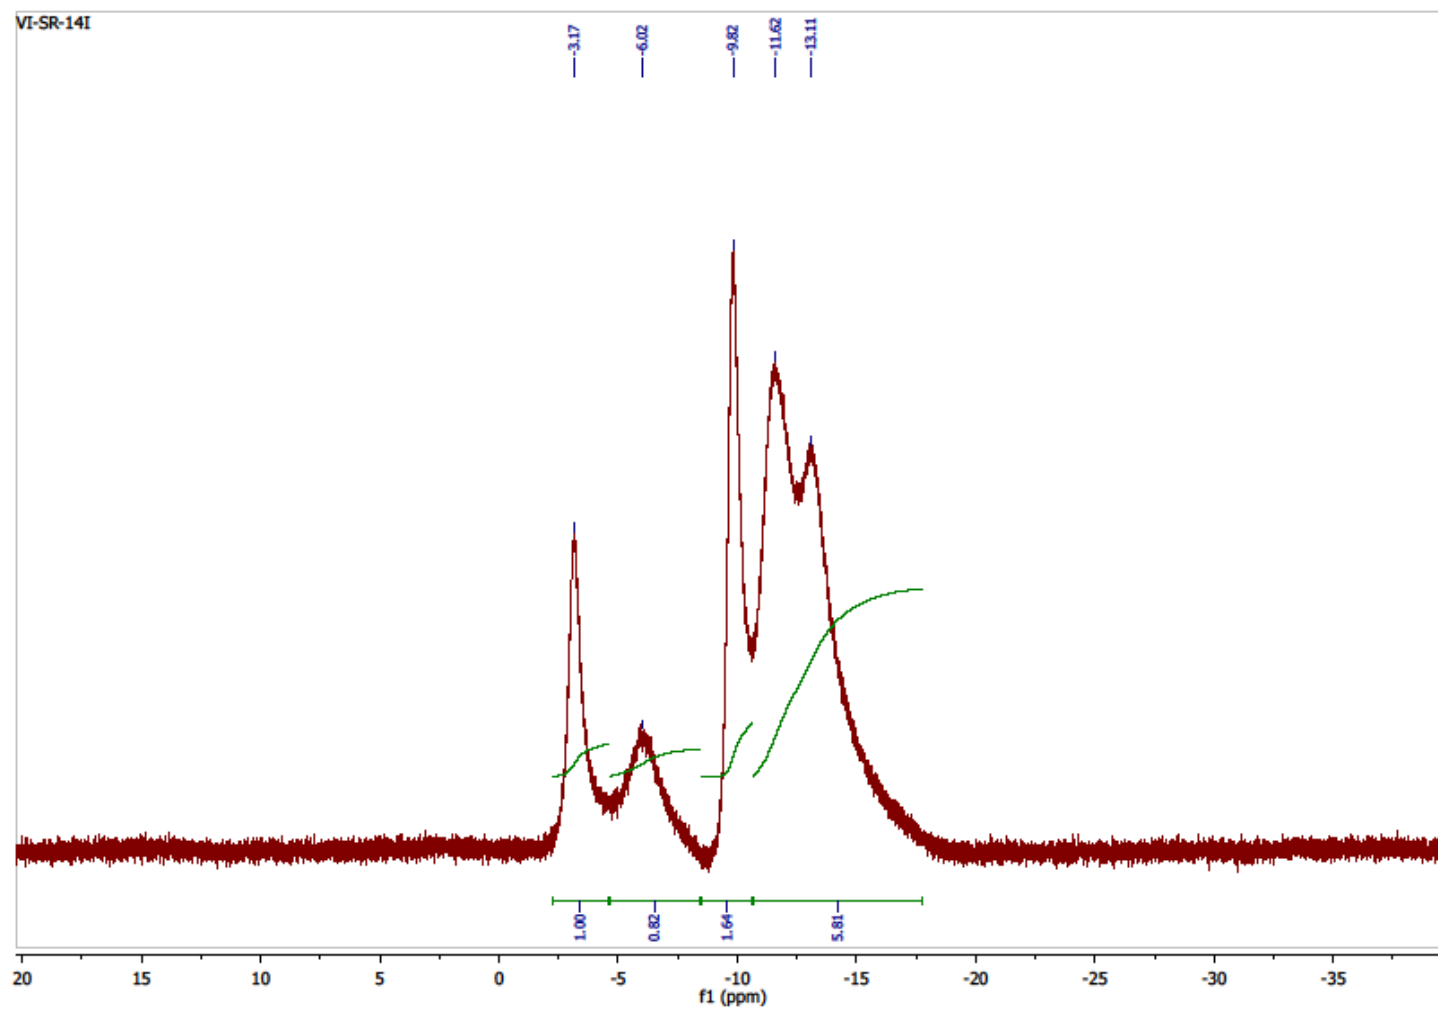

Figure S103.  $^{11}\text{B}$  NMR ( $^1\text{H}$  BB) spectrum of 33.

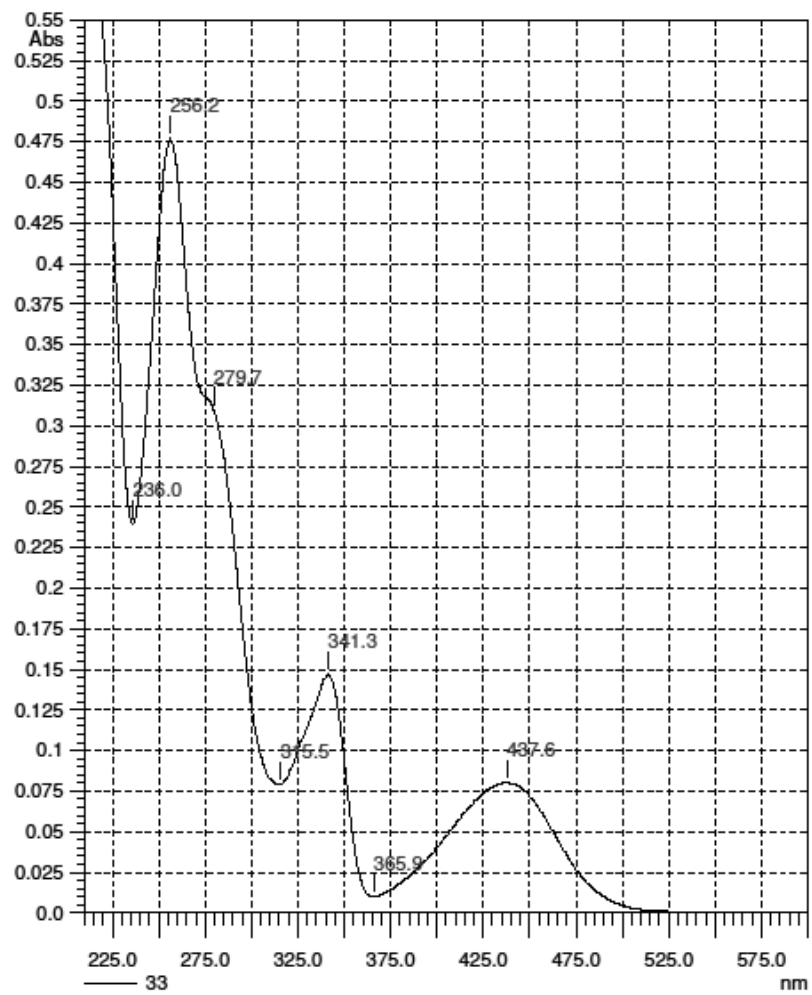

Figure S104. UV spectrum of 33.

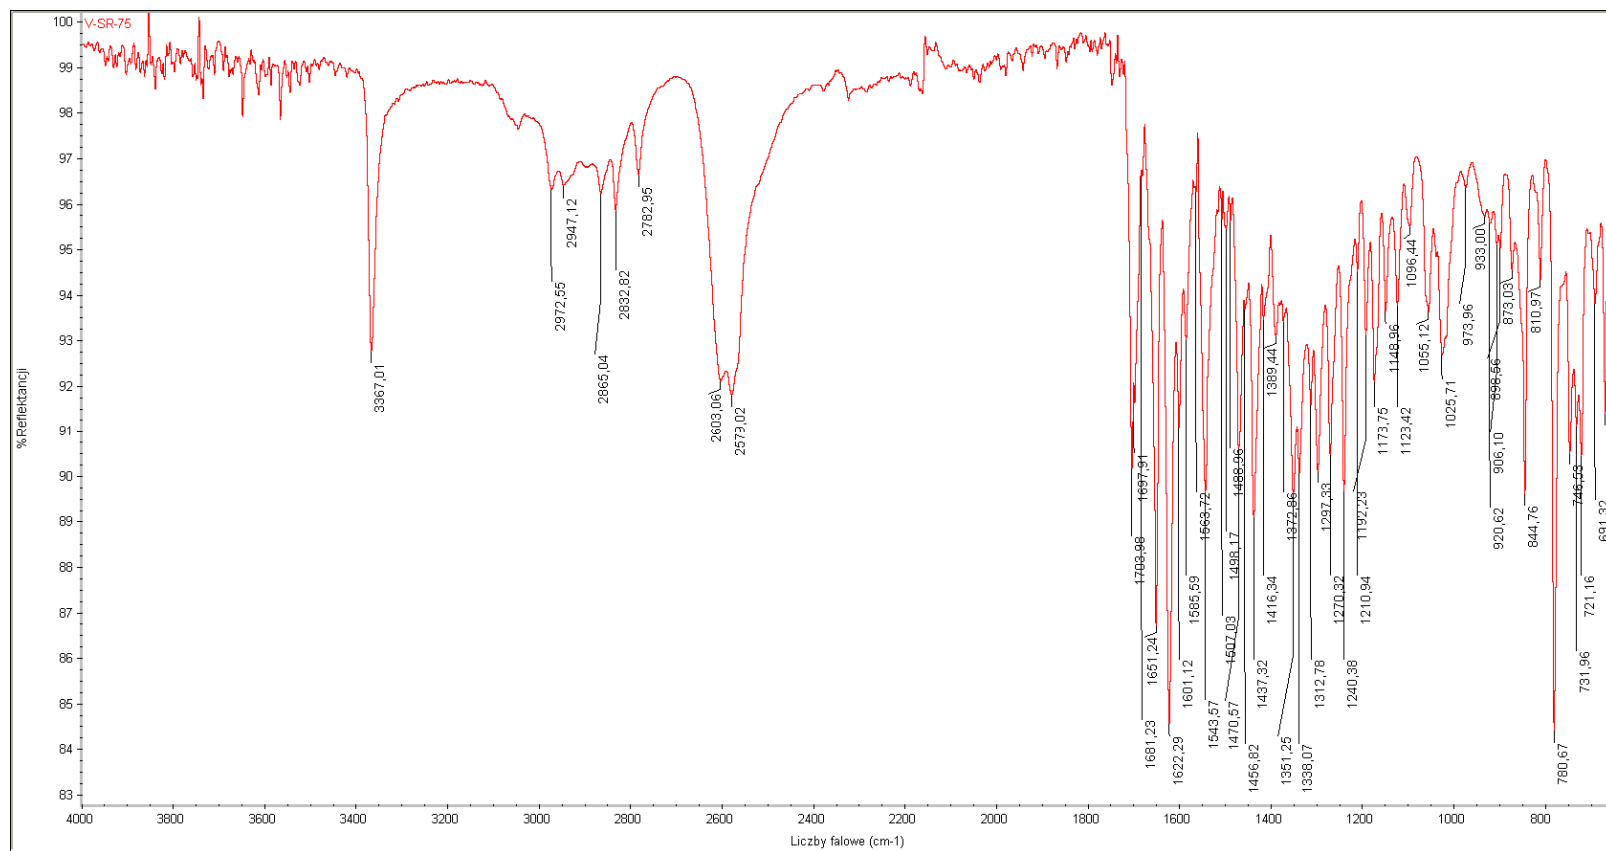

Figure S105. IR spectrum of 33.

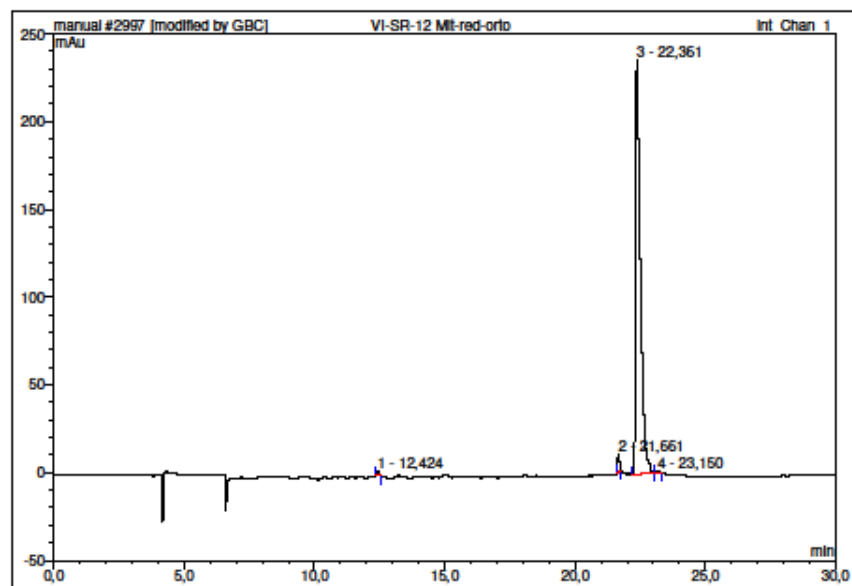

| No.           | Ret. Time<br>min | Peak Name | Height<br>mAu | Area<br>mAu*min | Rel. Area<br>% | Amount | Type |
|---------------|------------------|-----------|---------------|-----------------|----------------|--------|------|
| 1             | 12,42            | n.a.      | 2,295         | 0,298           | 0,58           | n.a.   | BMB* |
| 2             | 21,66            | n.a.      | 10,037        | 0,950           | 1,85           | n.a.   | BMB* |
| 3             | 22,36            | n.a.      | 235,948       | 49,811          | 97,15          | n.a.   | BMB* |
| 4             | 23,15            | n.a.      | 1,591         | 0,215           | 0,42           | n.a.   | BMB* |
| <b>Total:</b> |                  |           | 249,872       | 51,275          | 100,00         | 0,000  |      |

Figure S106. HPLC analysis of 33.



Spectrum Name: V-SR-75  
Start Ion: 400  
End Ion: 520  
Source: APCI + 10.0µA 400C  
Capillary: 150V 300C Offset: 25V Span: 0V

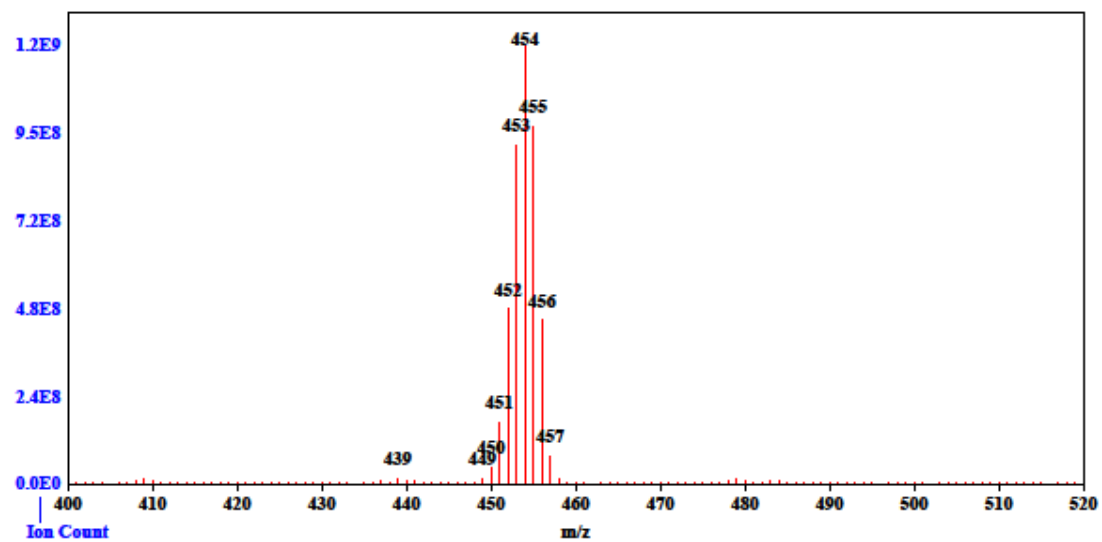

Figure S107. MS spectrum of 33.

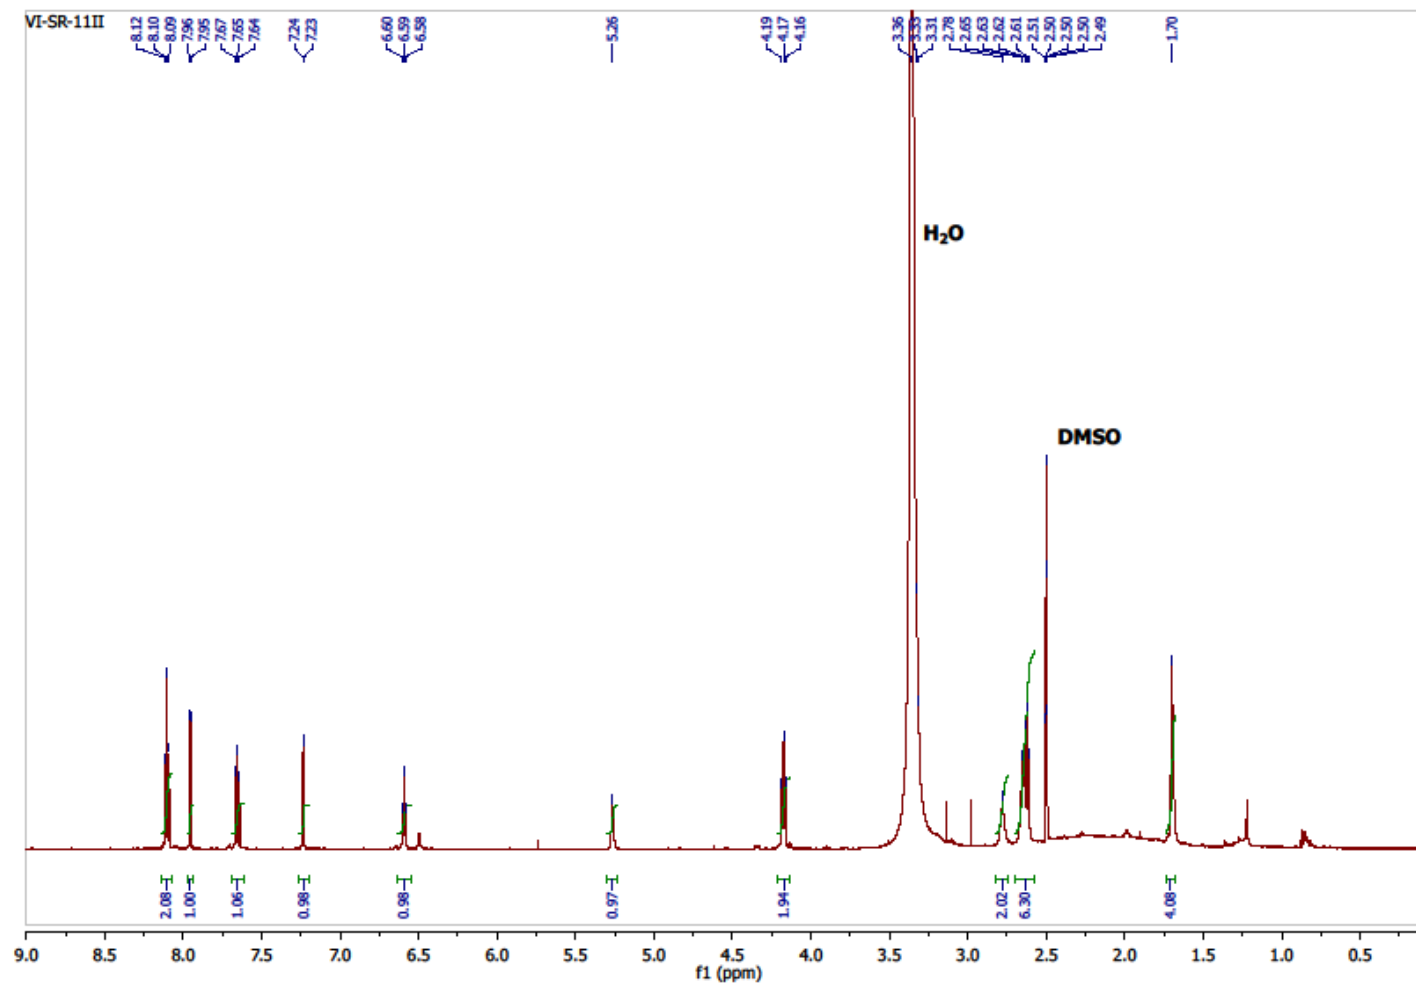

Figure S108. <sup>1</sup>H NMR spectrum of 34.

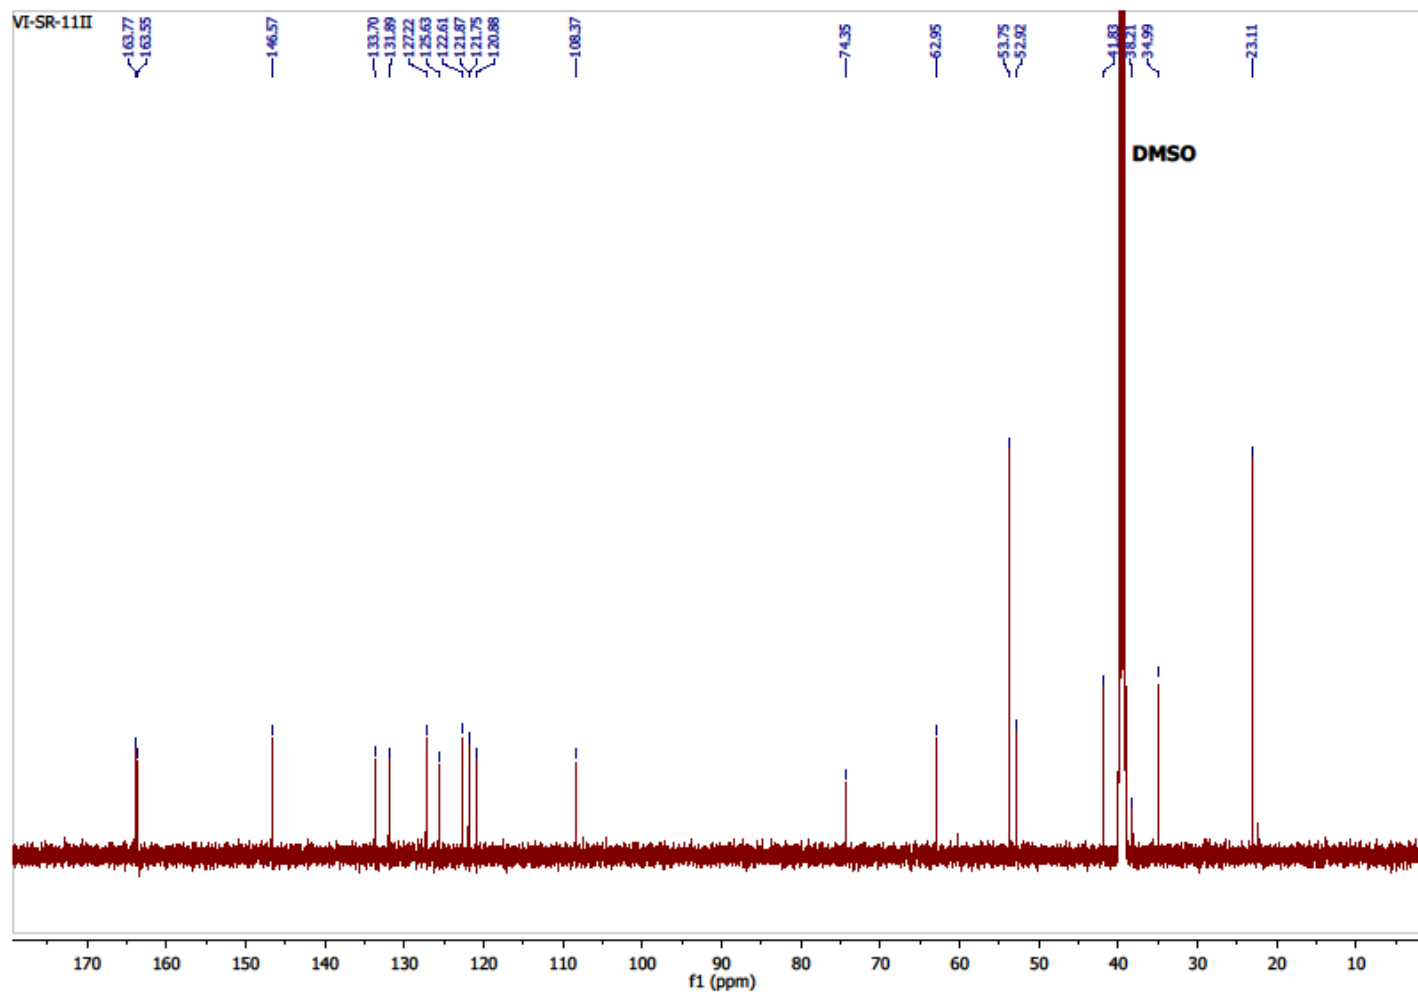

Figure S109.  $^{13}\text{C}$  NMR spectrum of 34.

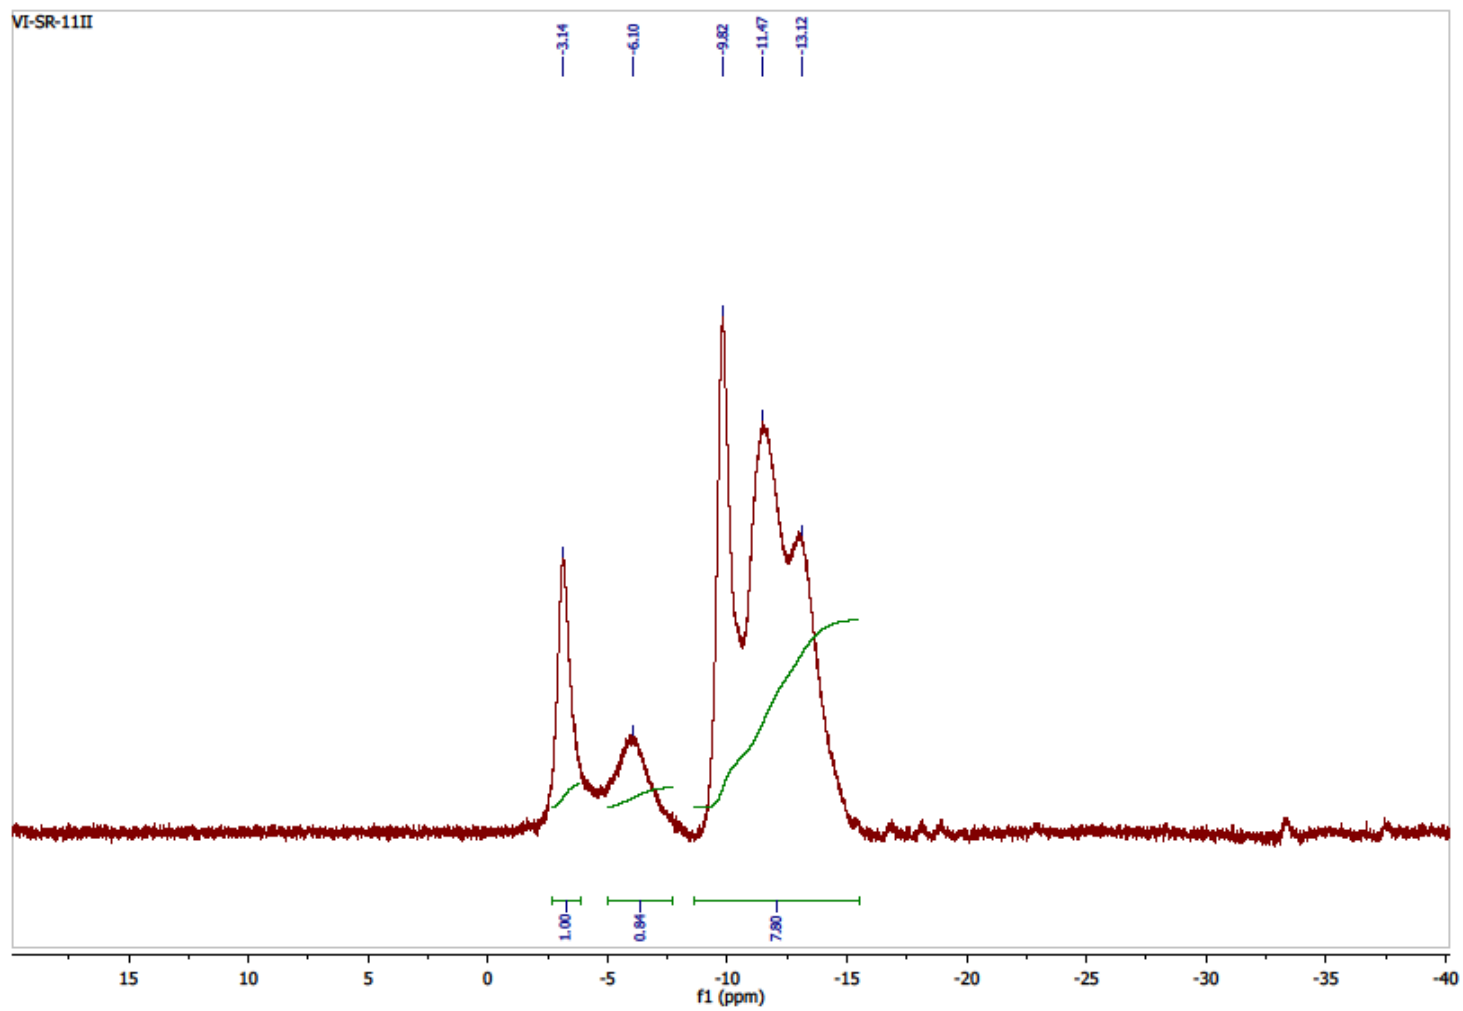

Figure S110.  $^{11}\text{B}$  NMR ( $^1\text{H}$  BB) spectrum of 34.

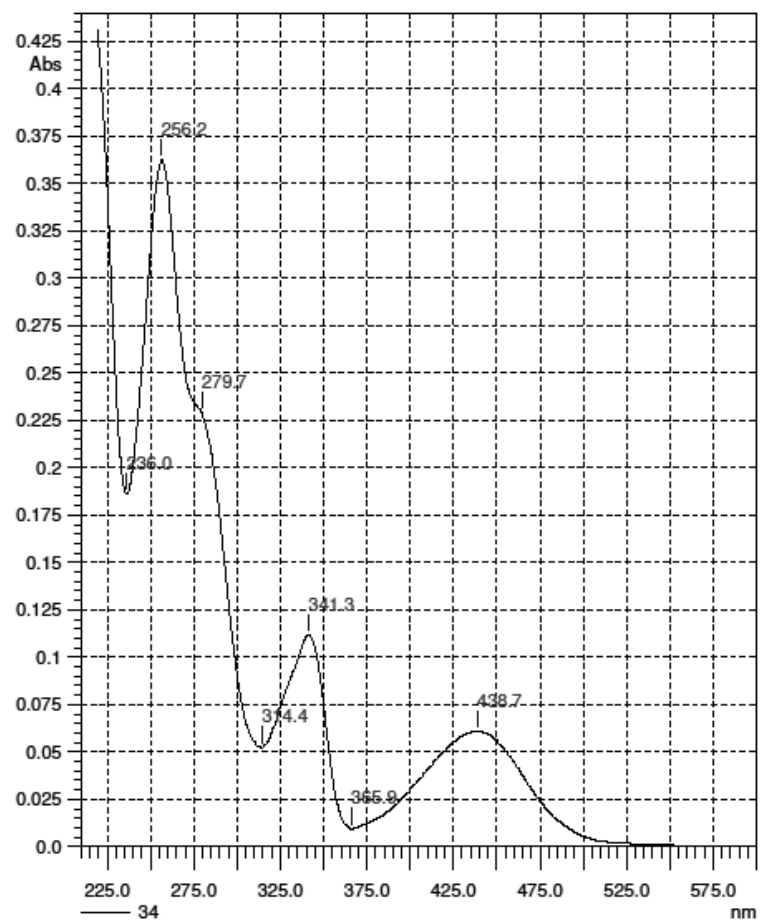

Figure S111. UV spectrum of 34.

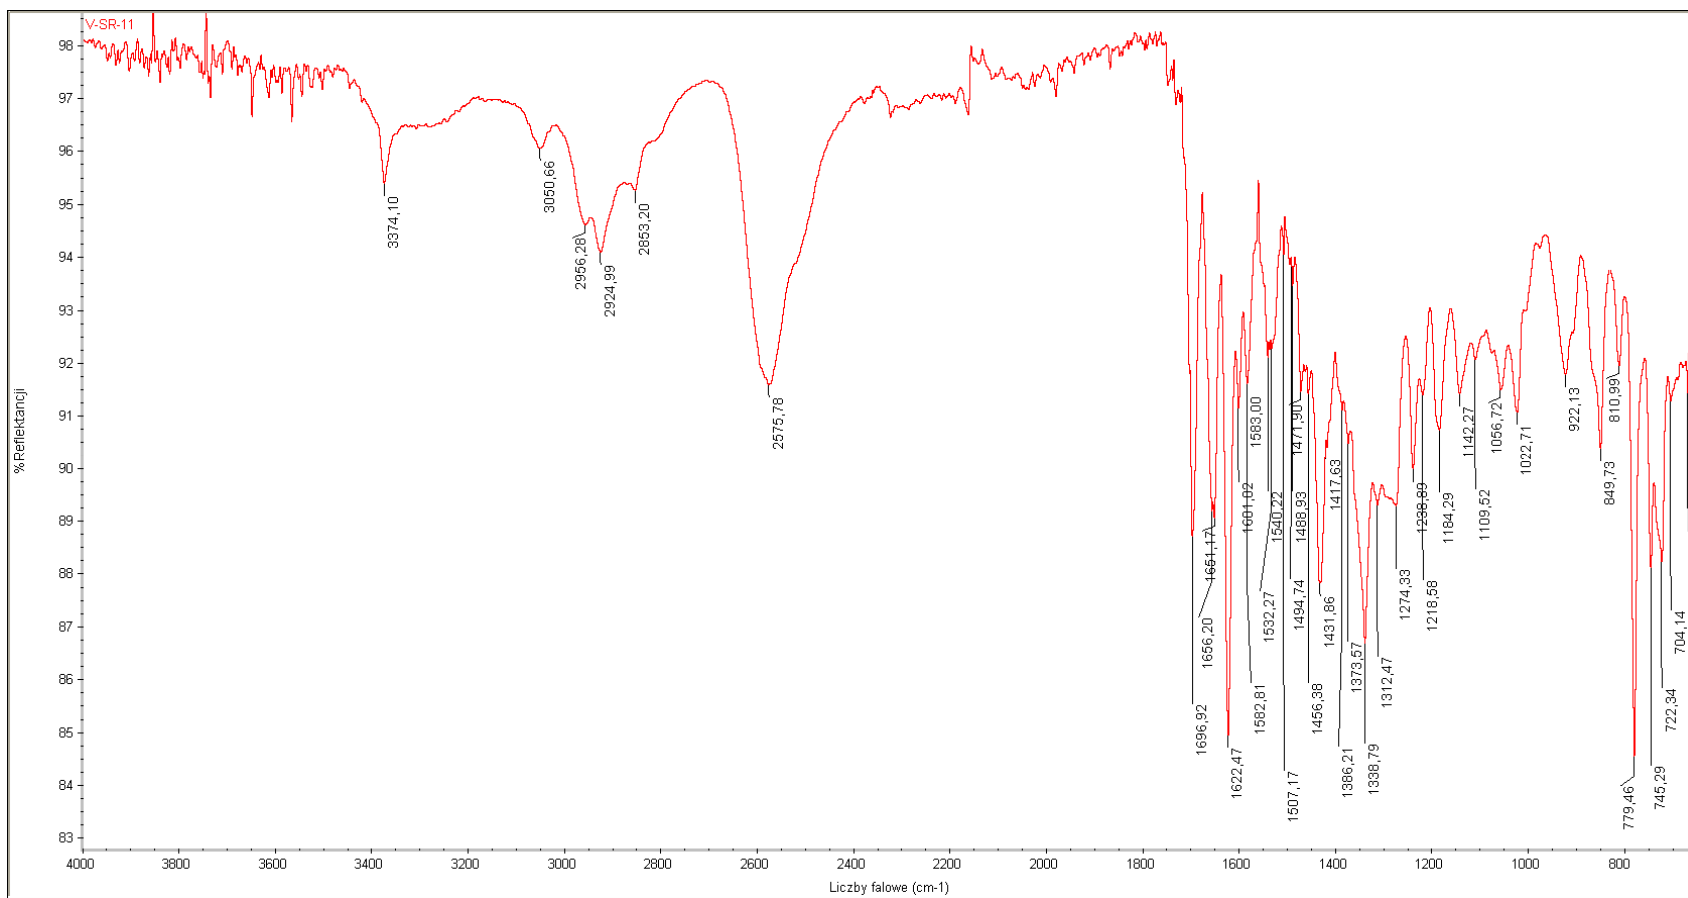

Figure S112. IR spectrum of 34.

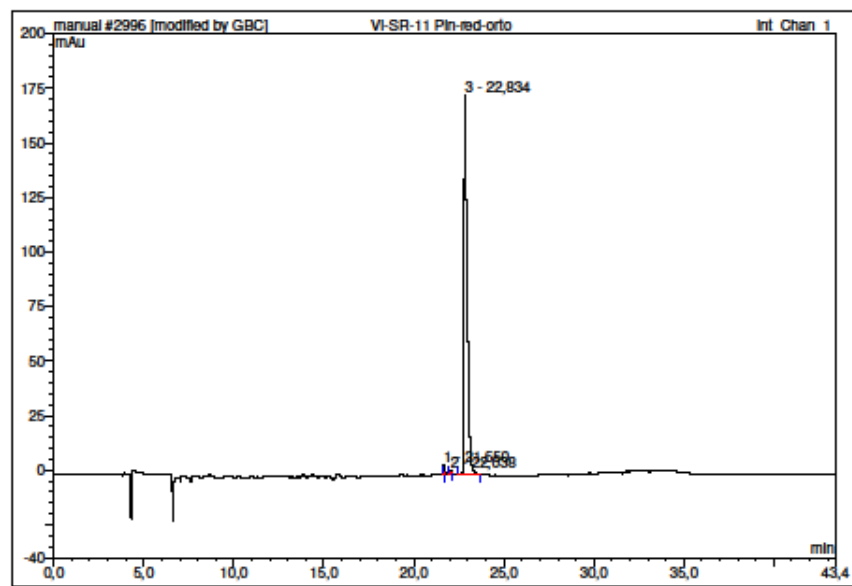

| No.           | Ret.Time<br>min | Peak Name | Height<br>mAu | Area<br>mAu*min | Rel.Area<br>% | Amount | Type |
|---------------|-----------------|-----------|---------------|-----------------|---------------|--------|------|
| 1             | 21,65           | n.a.      | 3,876         | 0,366           | 1,01          | n.a.   | BMB* |
| 2             | 22,04           | n.a.      | 1,402         | 0,149           | 0,41          | n.a.   | BMB* |
| 3             | 22,83           | n.a.      | 173,815       | 35,568          | 98,57         | n.a.   | BMB  |
| <b>Total:</b> |                 |           | 179,093       | 36,083          | 100,00        | 0,000  |      |

Figure S113. HPLC analysis of 34.

Spectrum Name: V-SR-11  
Start Ion: 400  
End Ion: 550  
Source: APCI + 10.0μA 400C  
Capillary: 150V 300C Offset: 25V Span: 0V

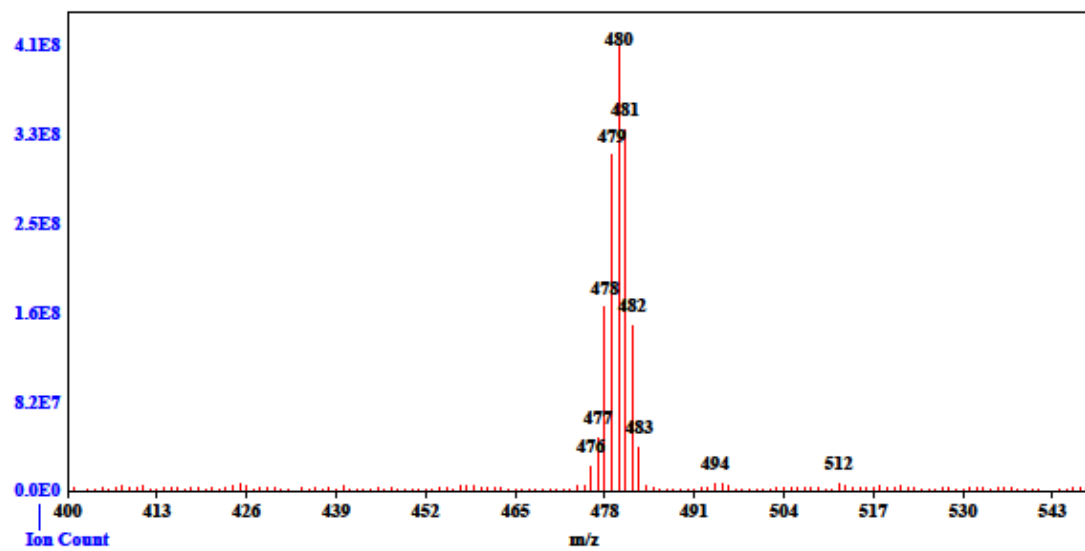

Figure S114. MS spectrum of 34.



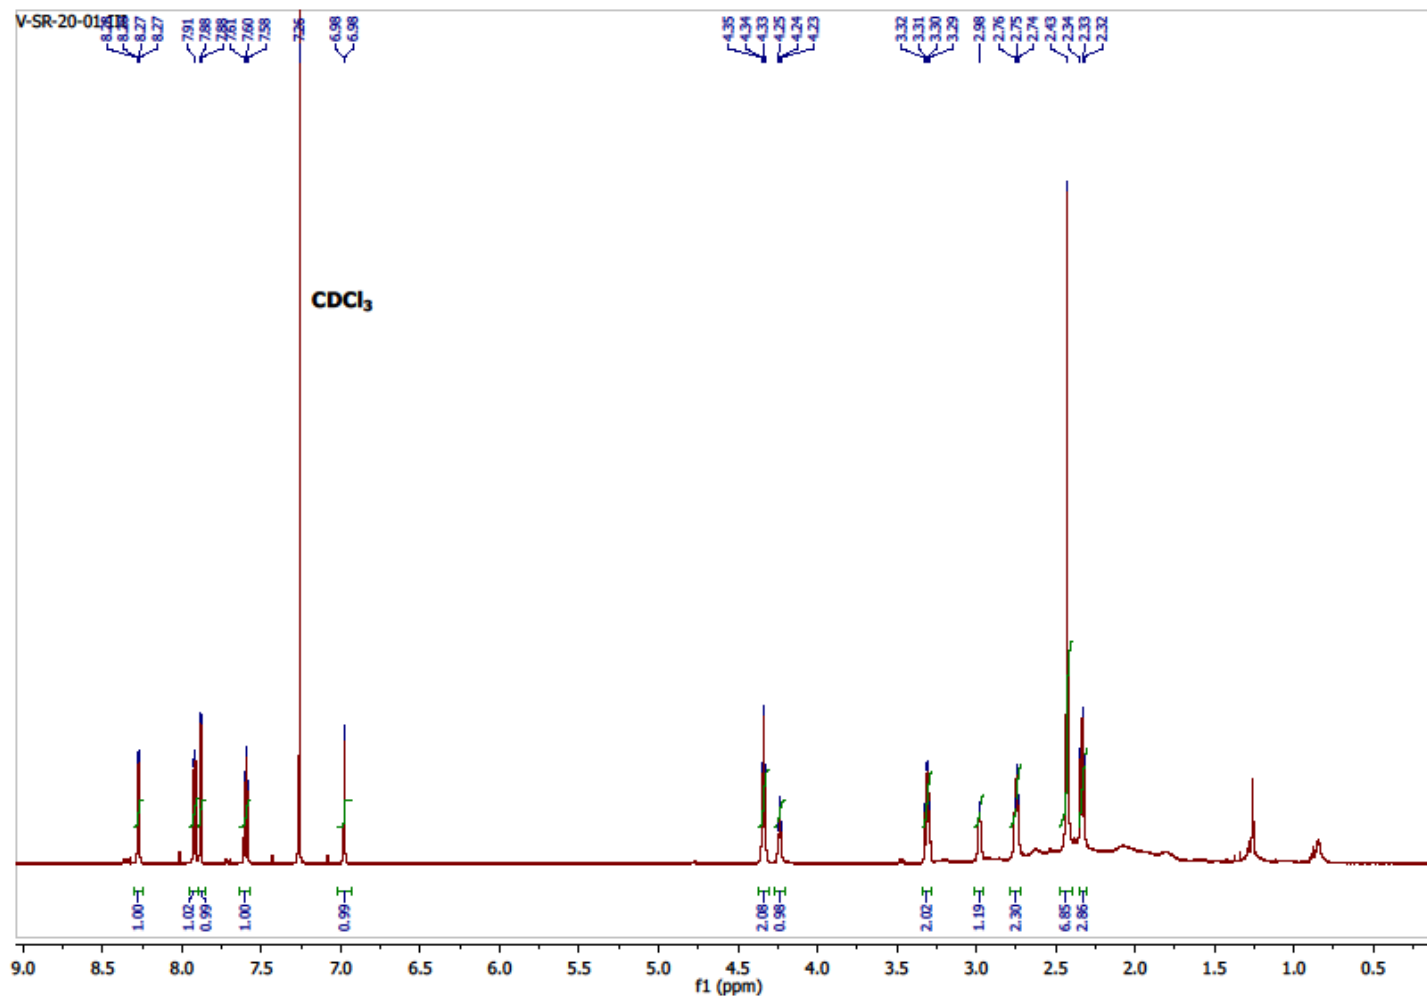

Figure S115. <sup>1</sup>H NMR spectrum of 35.

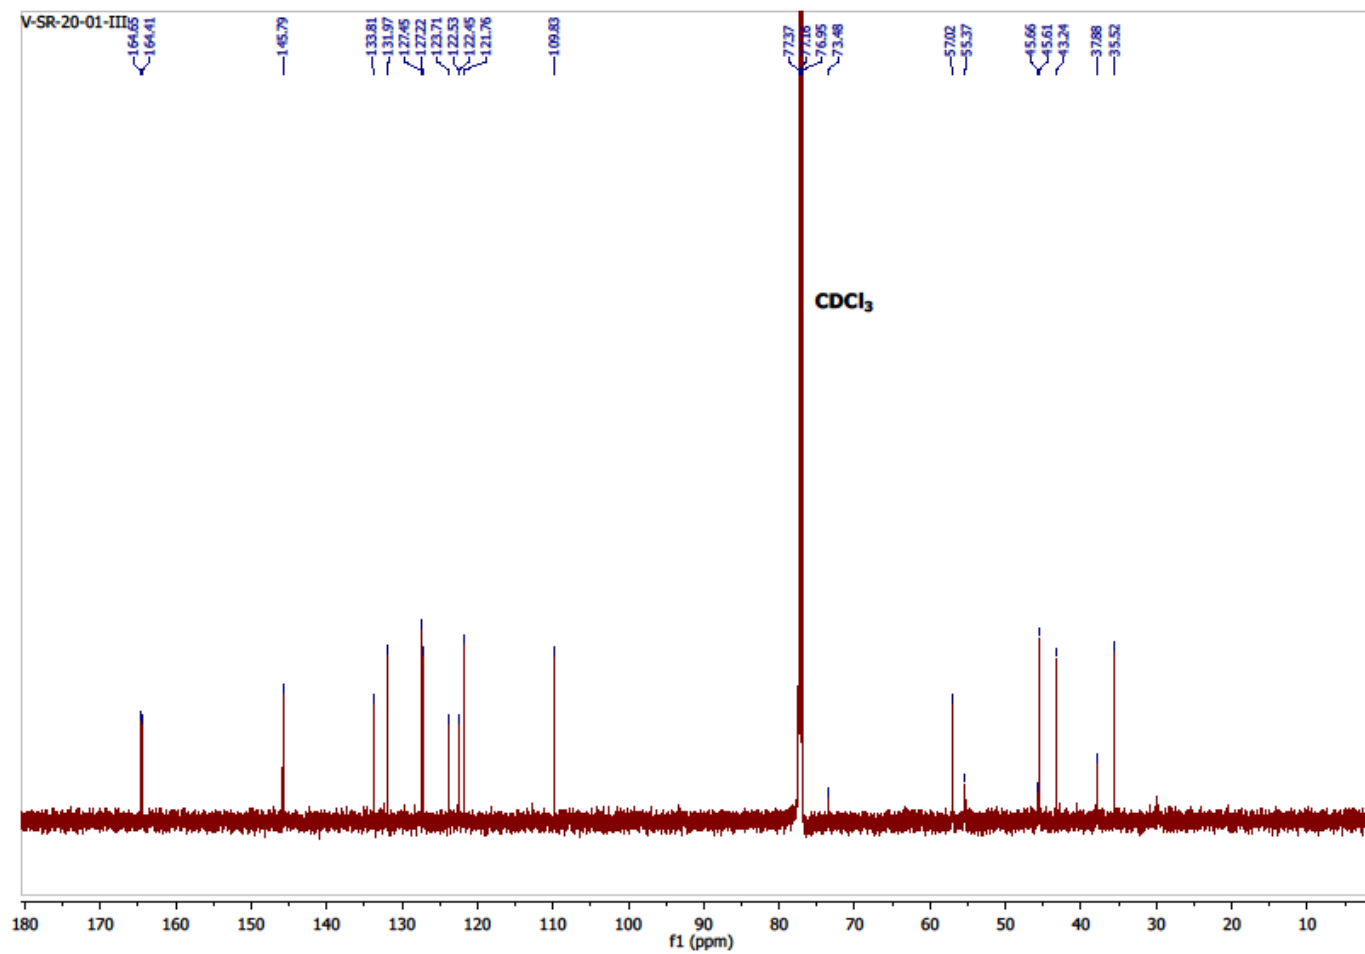

Figure S116. <sup>13</sup>C NMR spectrum of 35.

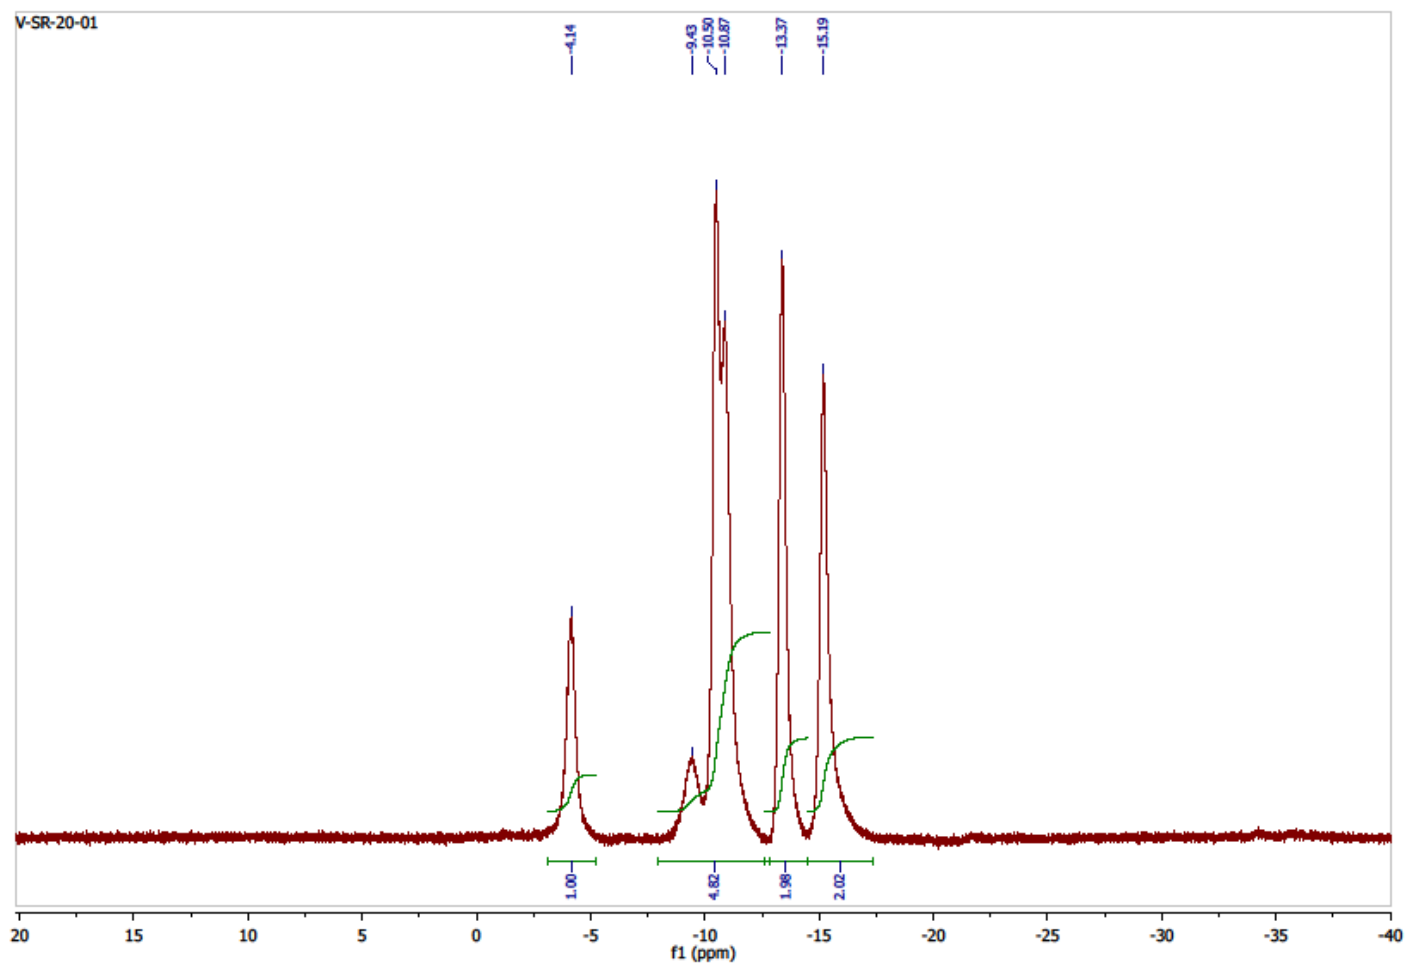

Figure S117.  $^{11}\text{B}$  NMR ( $^1\text{H}$  BB) spectrum of 35.

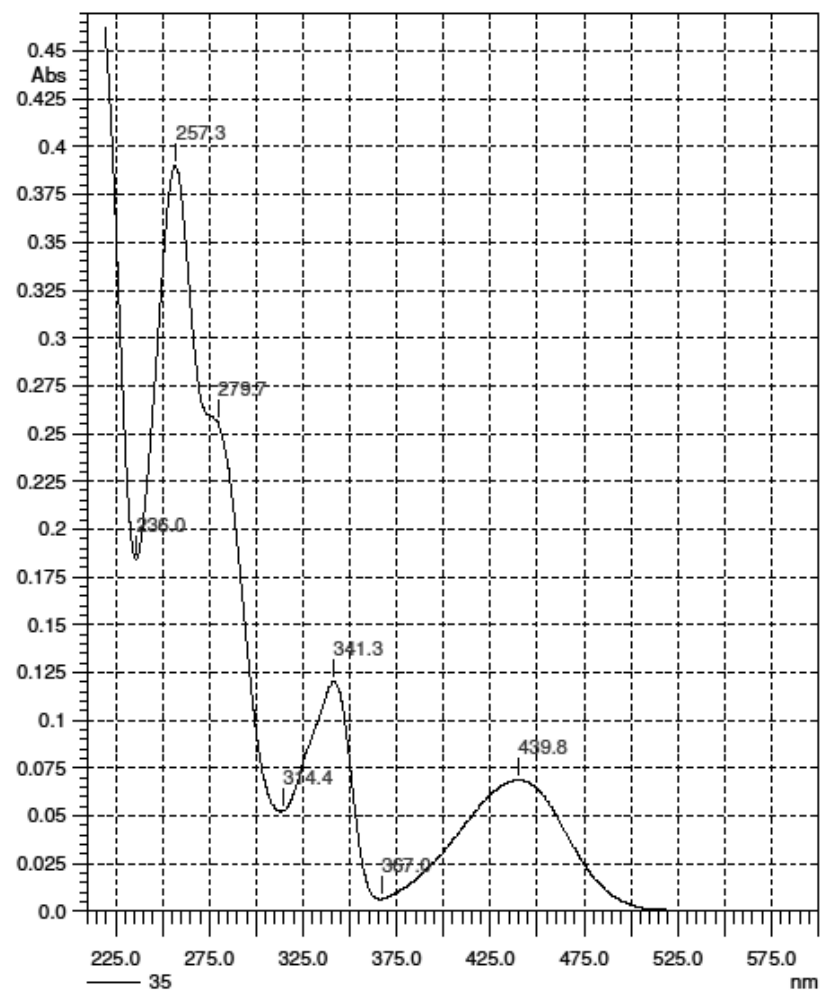

Figure S118. UV spectrum of 35.

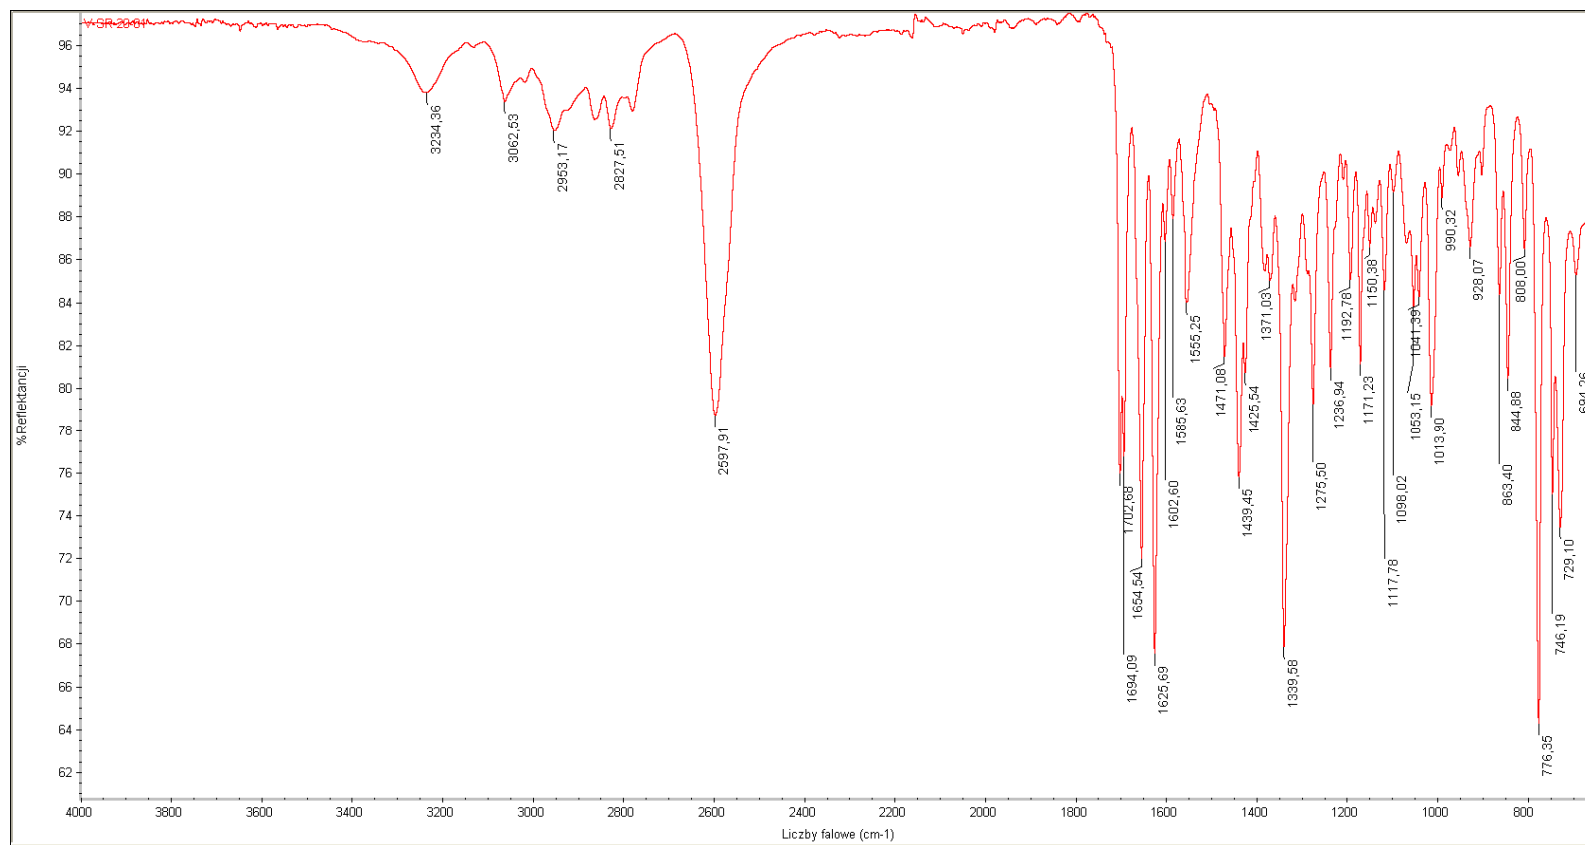

Figure S119. IR spectrum of 35.

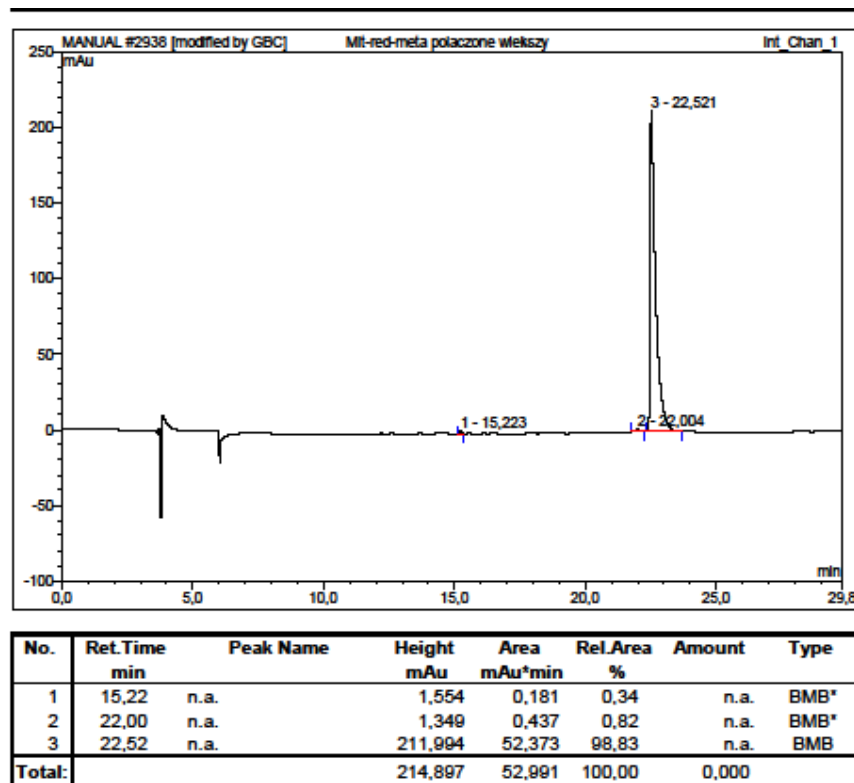

Figure S120. HPLC analysis of 35.

Spectrum Name: V-SR-20-01  
Start Ion: 350  
End Ion: 550  
Source: APCI + 10.0µA 400C  
Capillary: 150V 300C Offset: 25V Span: 0V

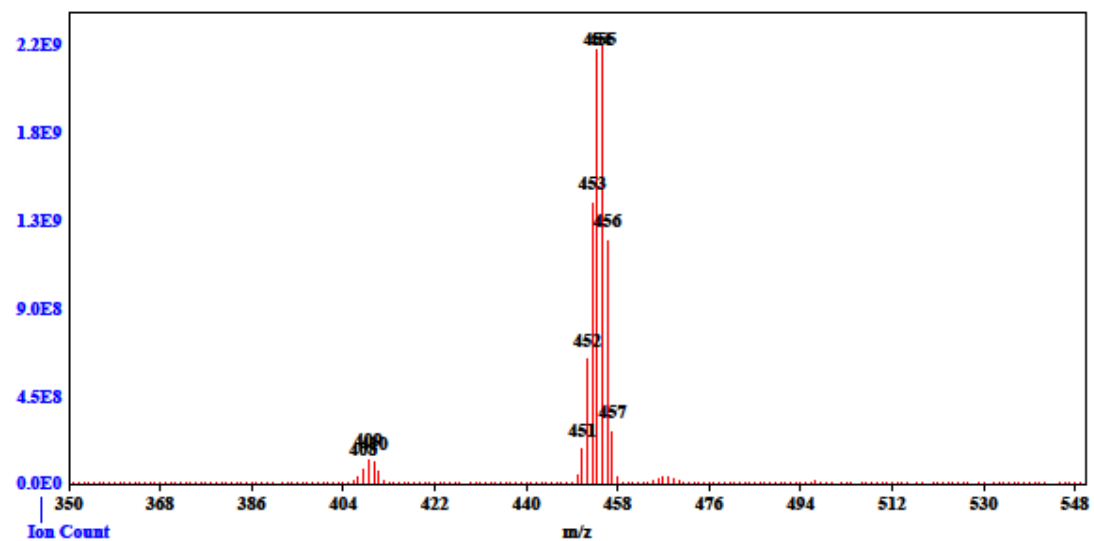

Figure S121. MS spectrum of 35.

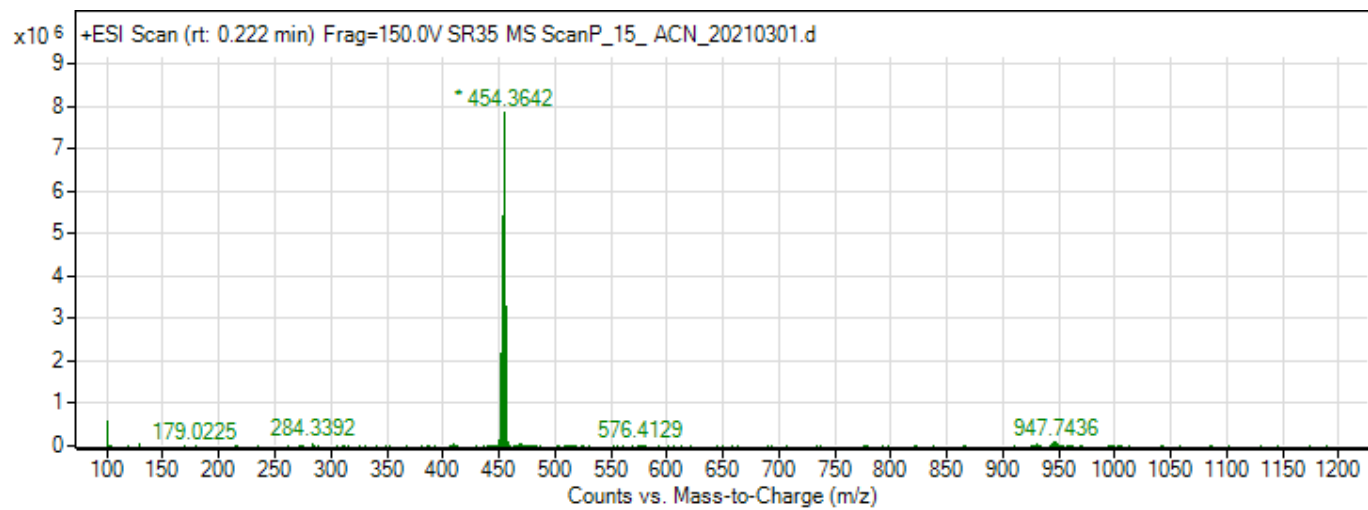

Figure S122. HRMS spectrum of 35.



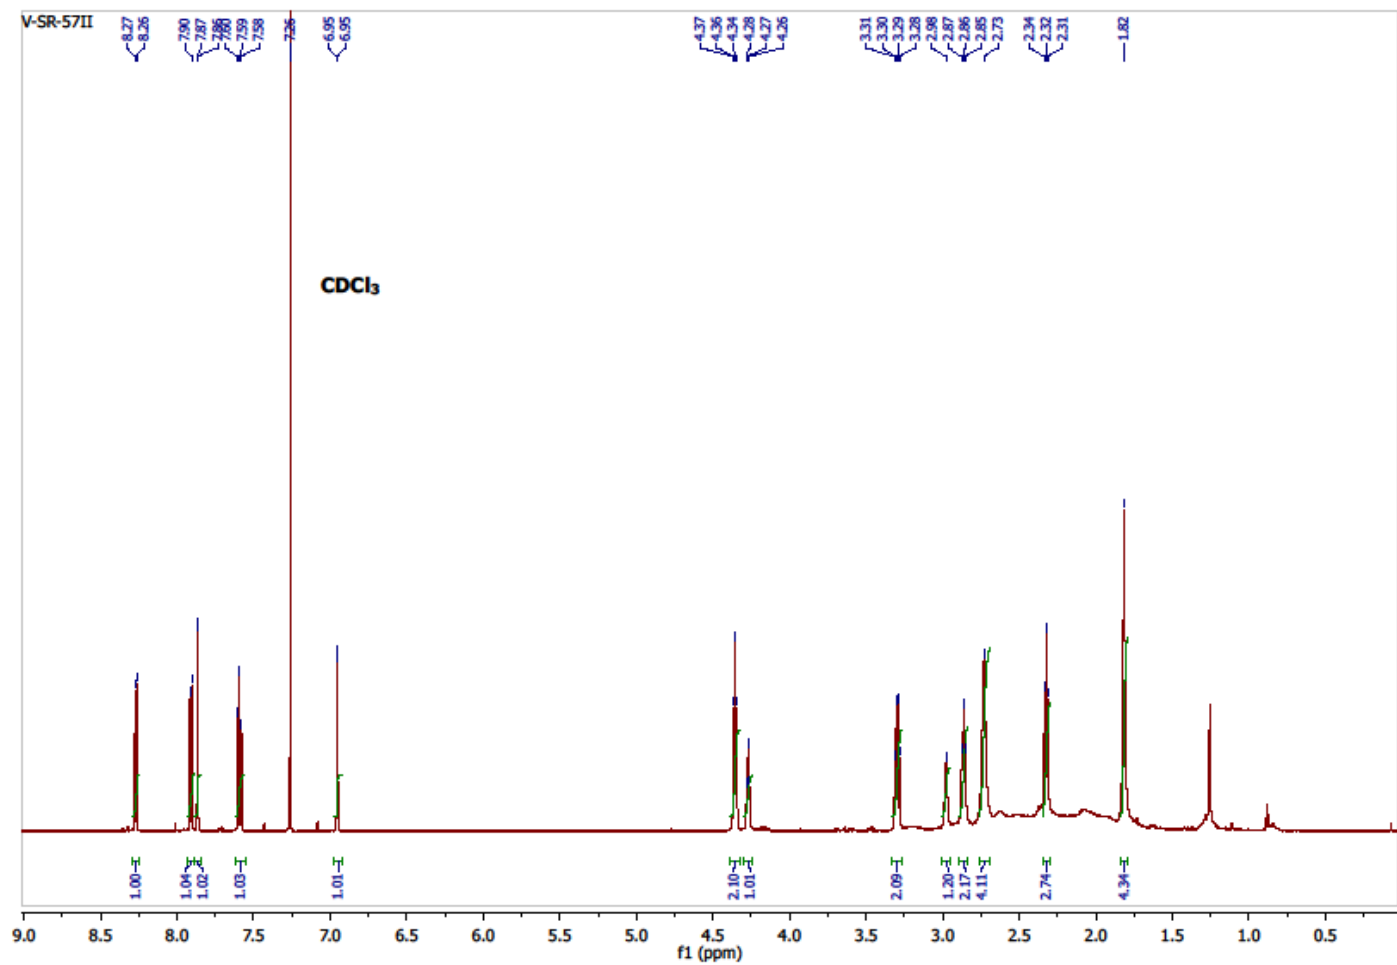

Figure S123. <sup>1</sup>H NMR spectrum of 36.

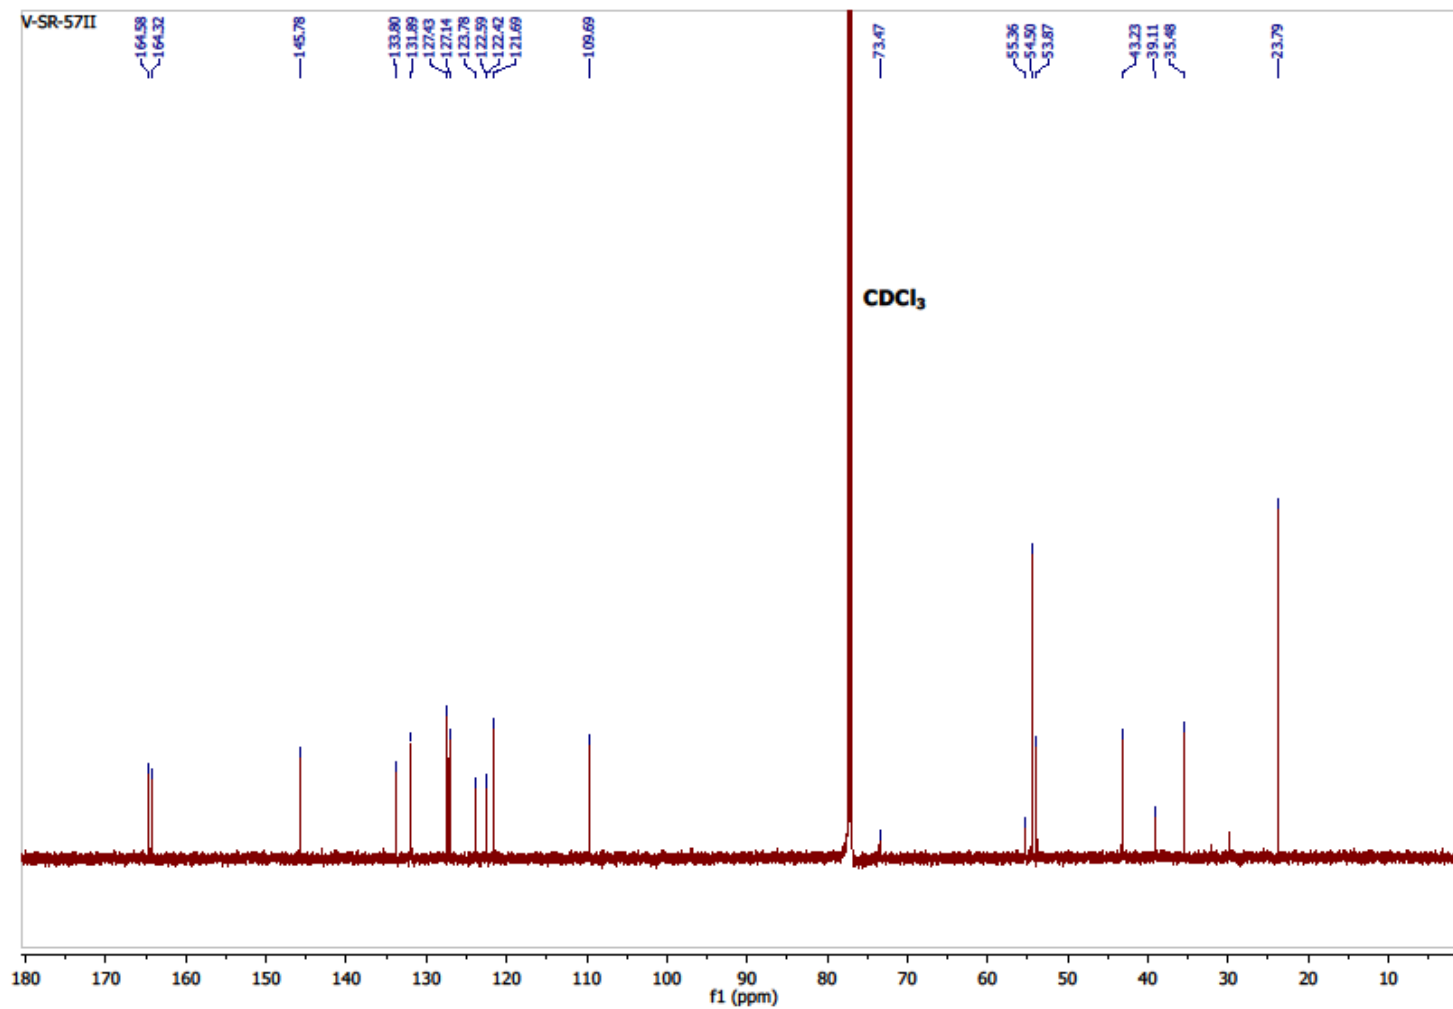

Figure S124. <sup>13</sup>C NMR spectrum of 36.

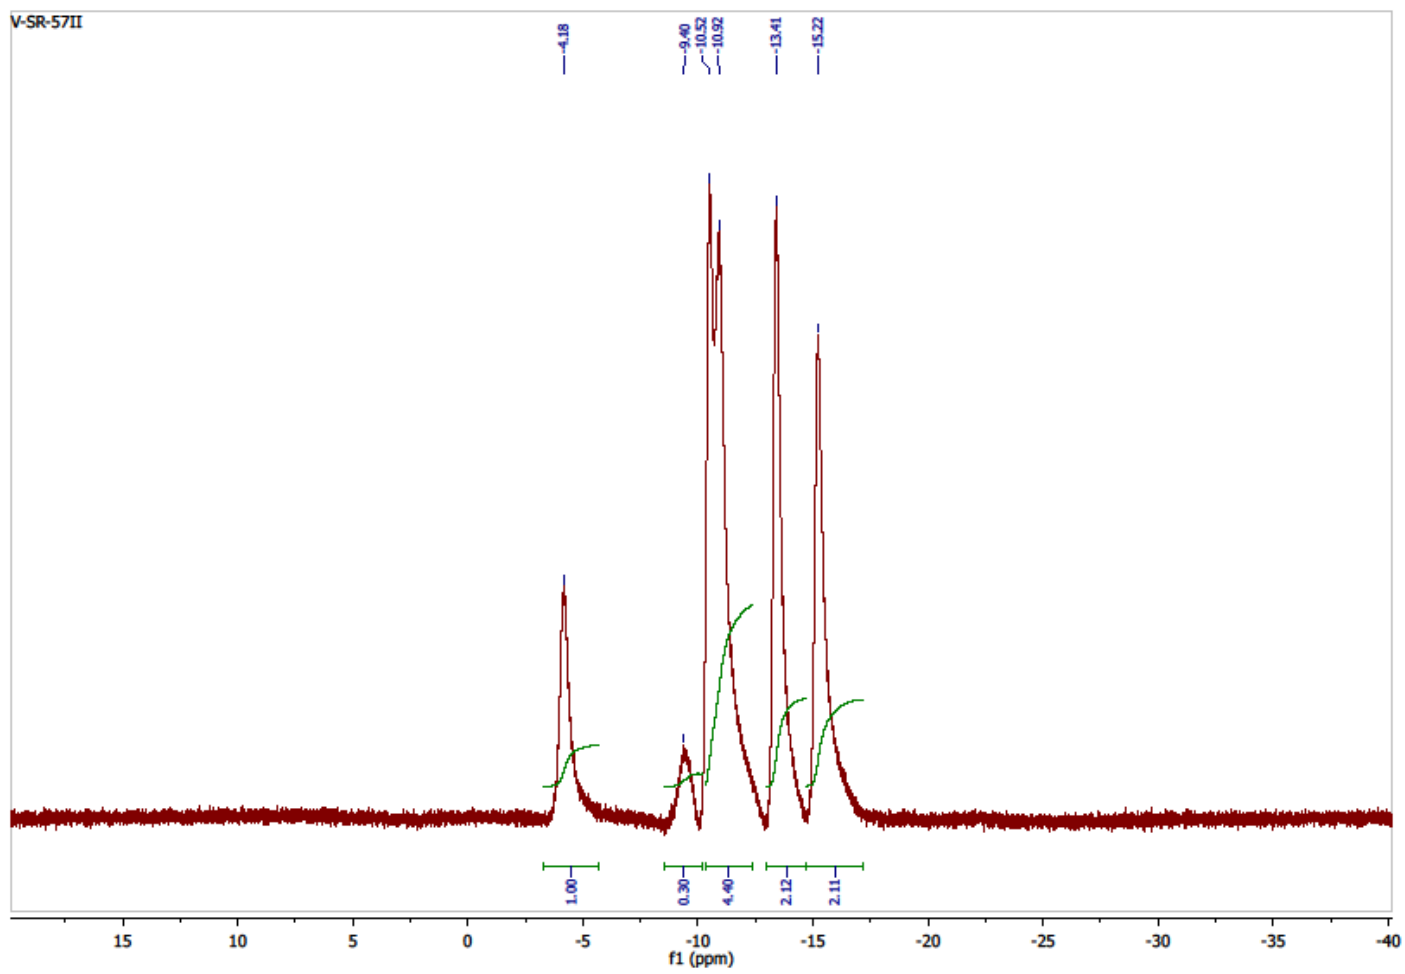

Figure S125.  $^{11}\text{B}$  NMR ( $^1\text{H}$  BB) spectrum of **36**.

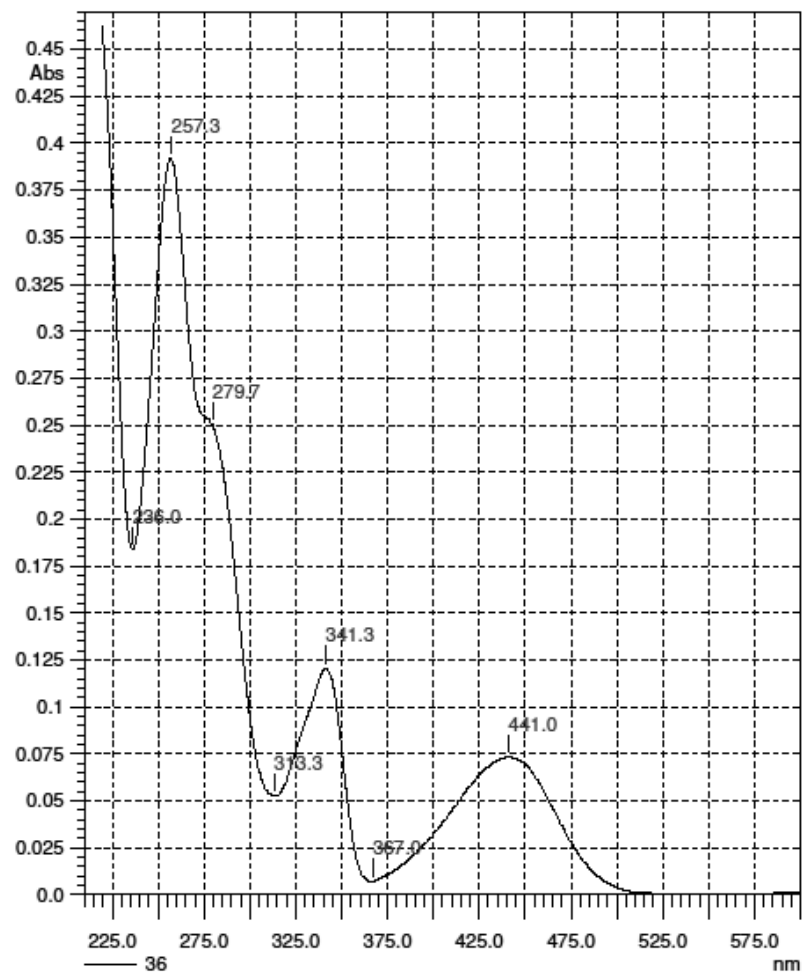

Figure S126. UV spectrum of 36.

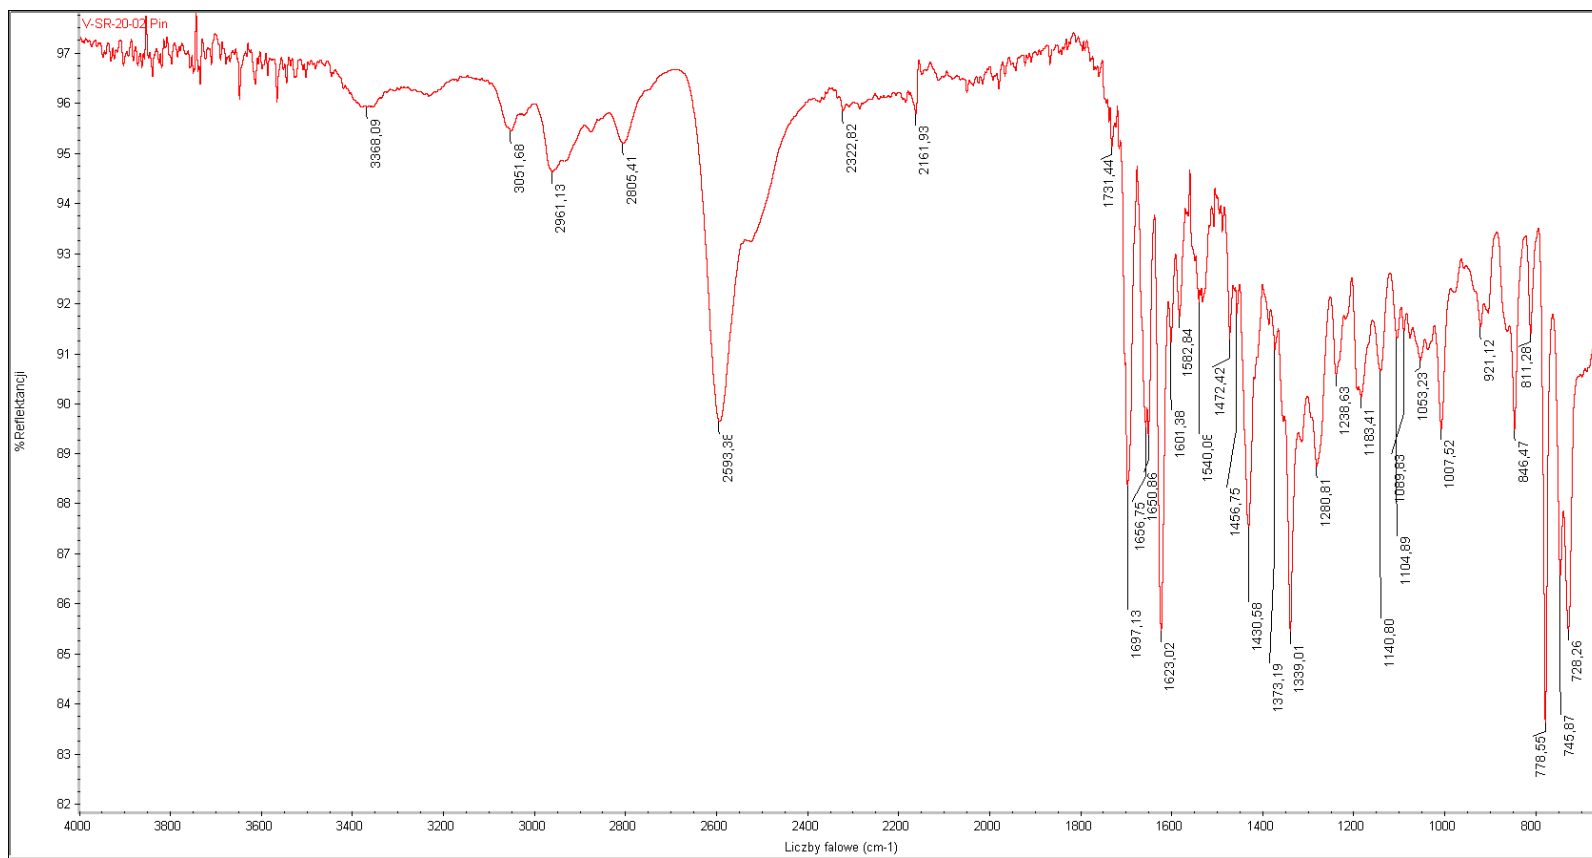

Figure S127. IR spectrum of 36.

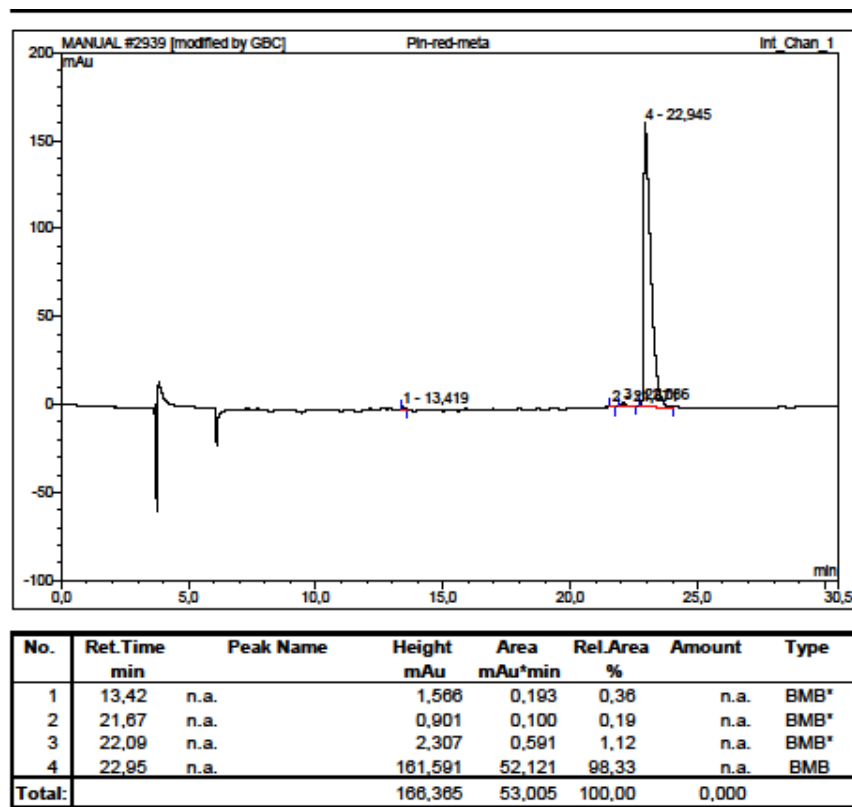

Figure S128. HPLC analysis of 36.

Spectrum Name: V-SR-57  
Start Ion: 400  
End Ion: 600  
Source: APCI + 10.0 $\mu$ A 400C  
Capillary: 150V 300C Offset: 25V Span: 0V

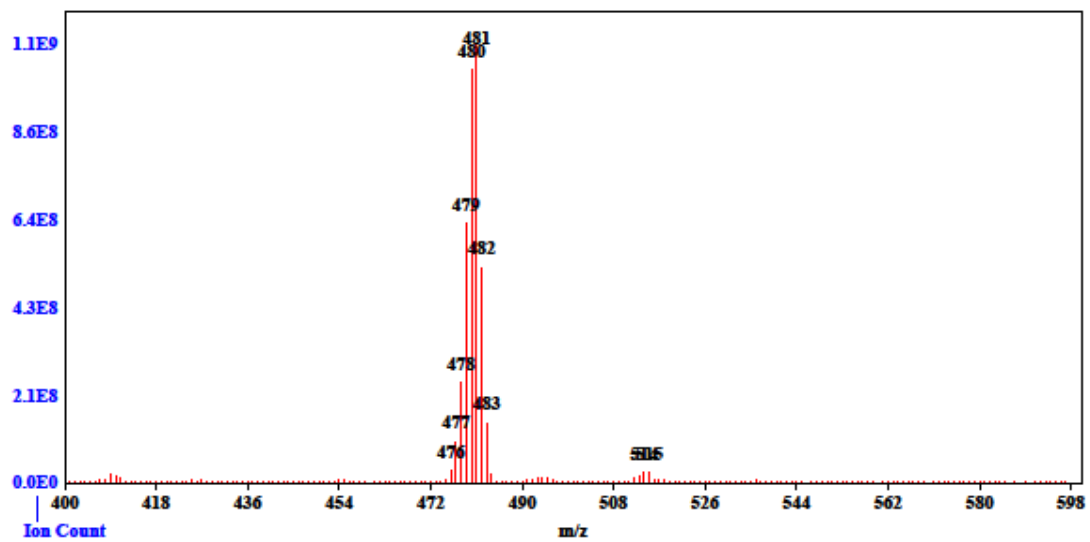

Figure S129. MS spectrum of 36.

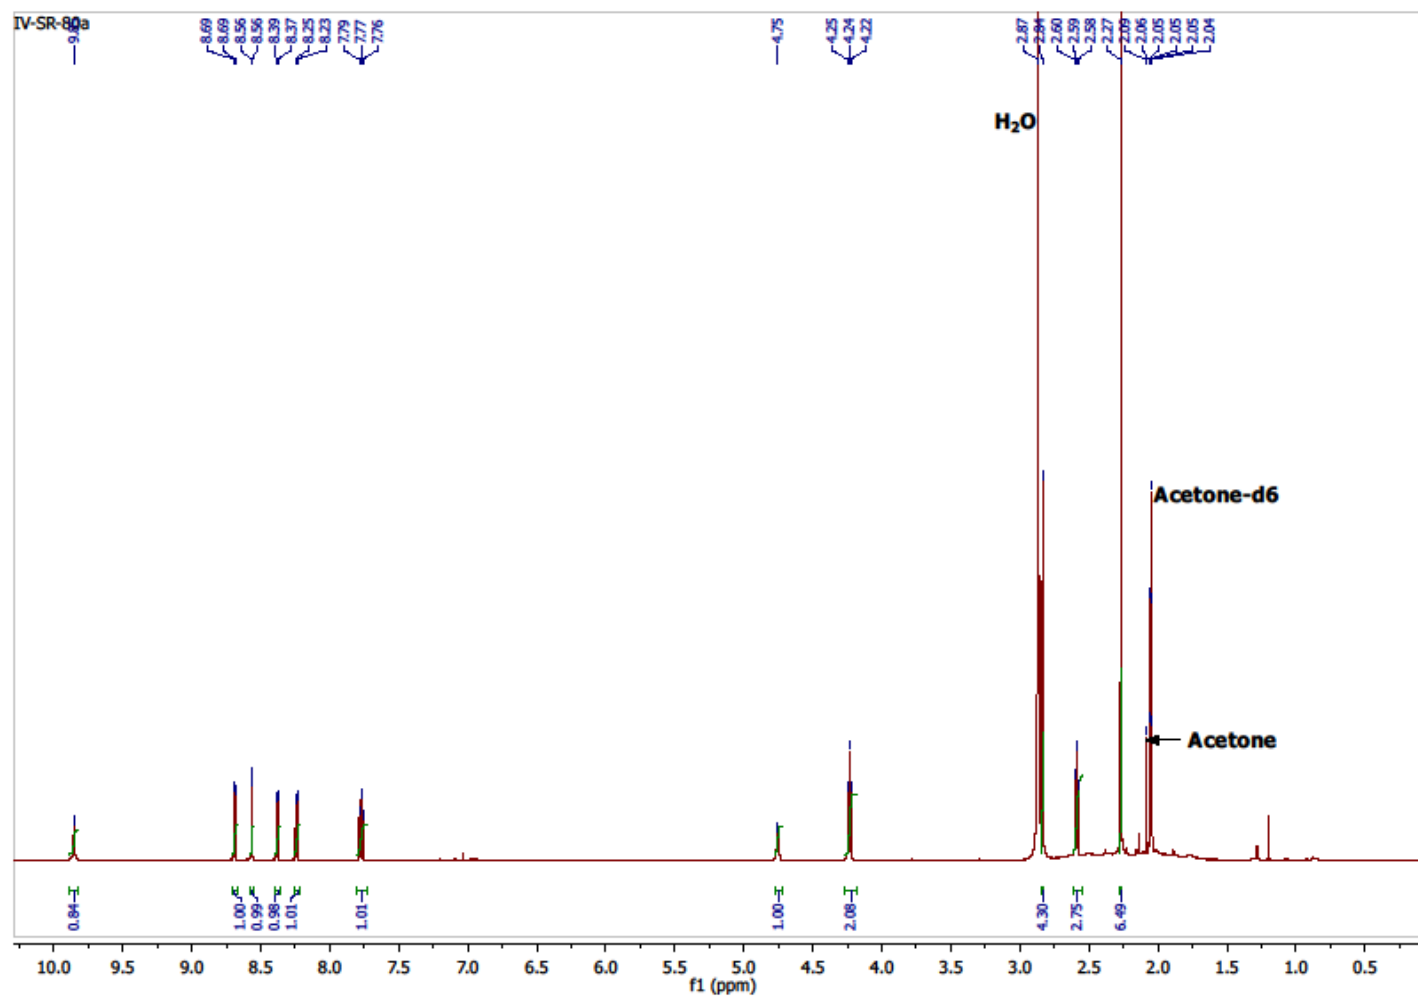

Figure S130. <sup>1</sup>H NMR spectrum of 39.



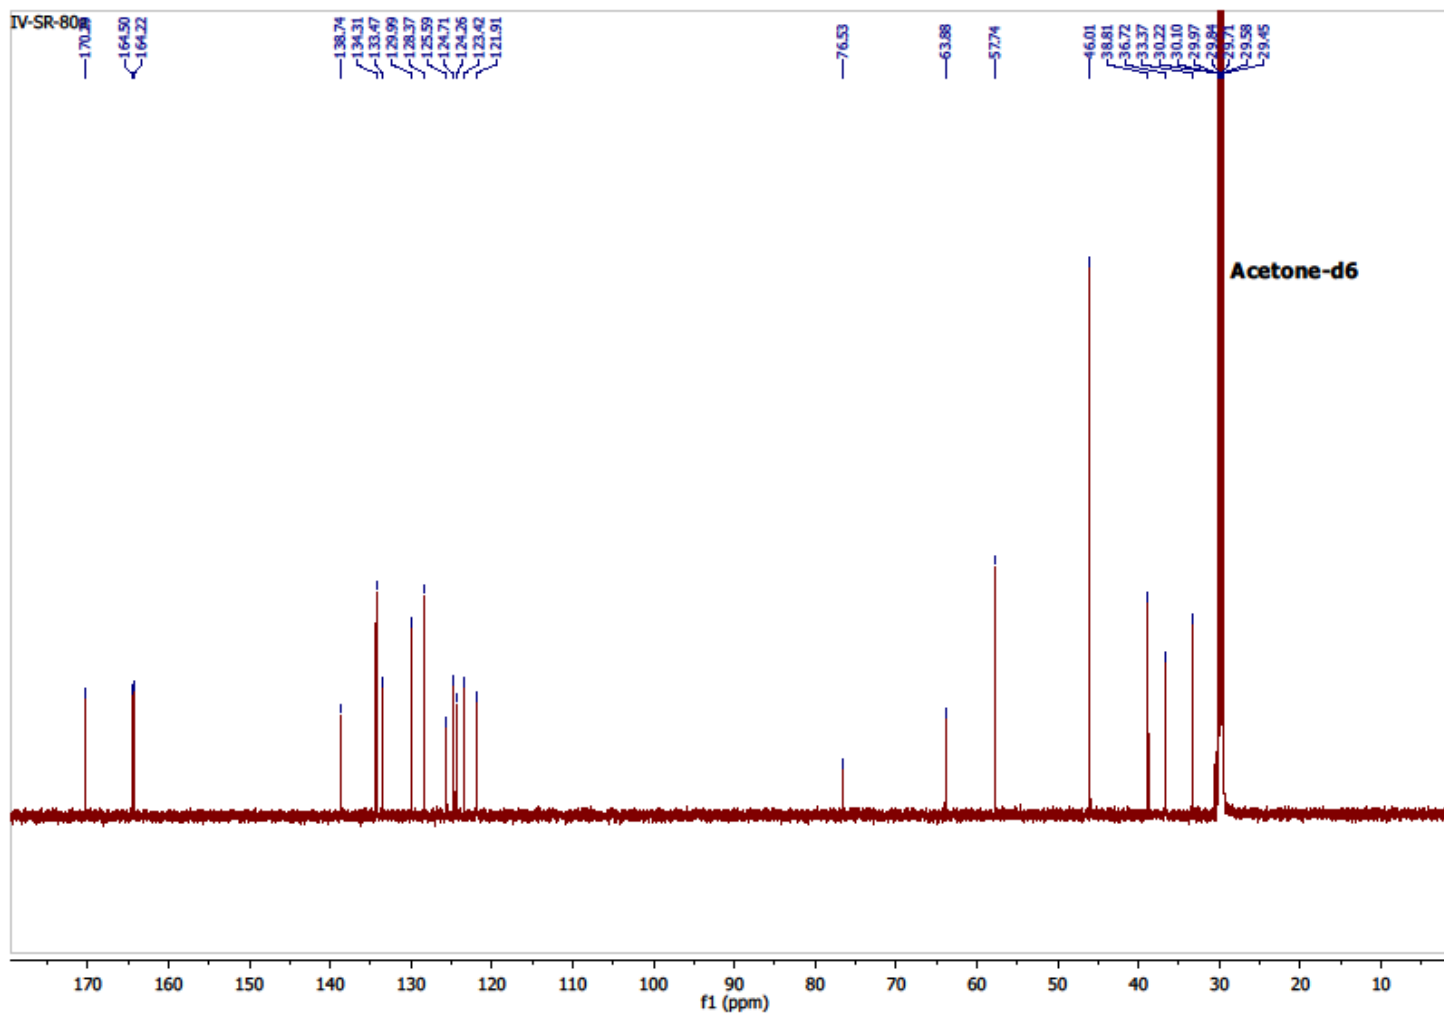

Figure S131.  $^{13}\text{C}$  NMR spectrum of 39.

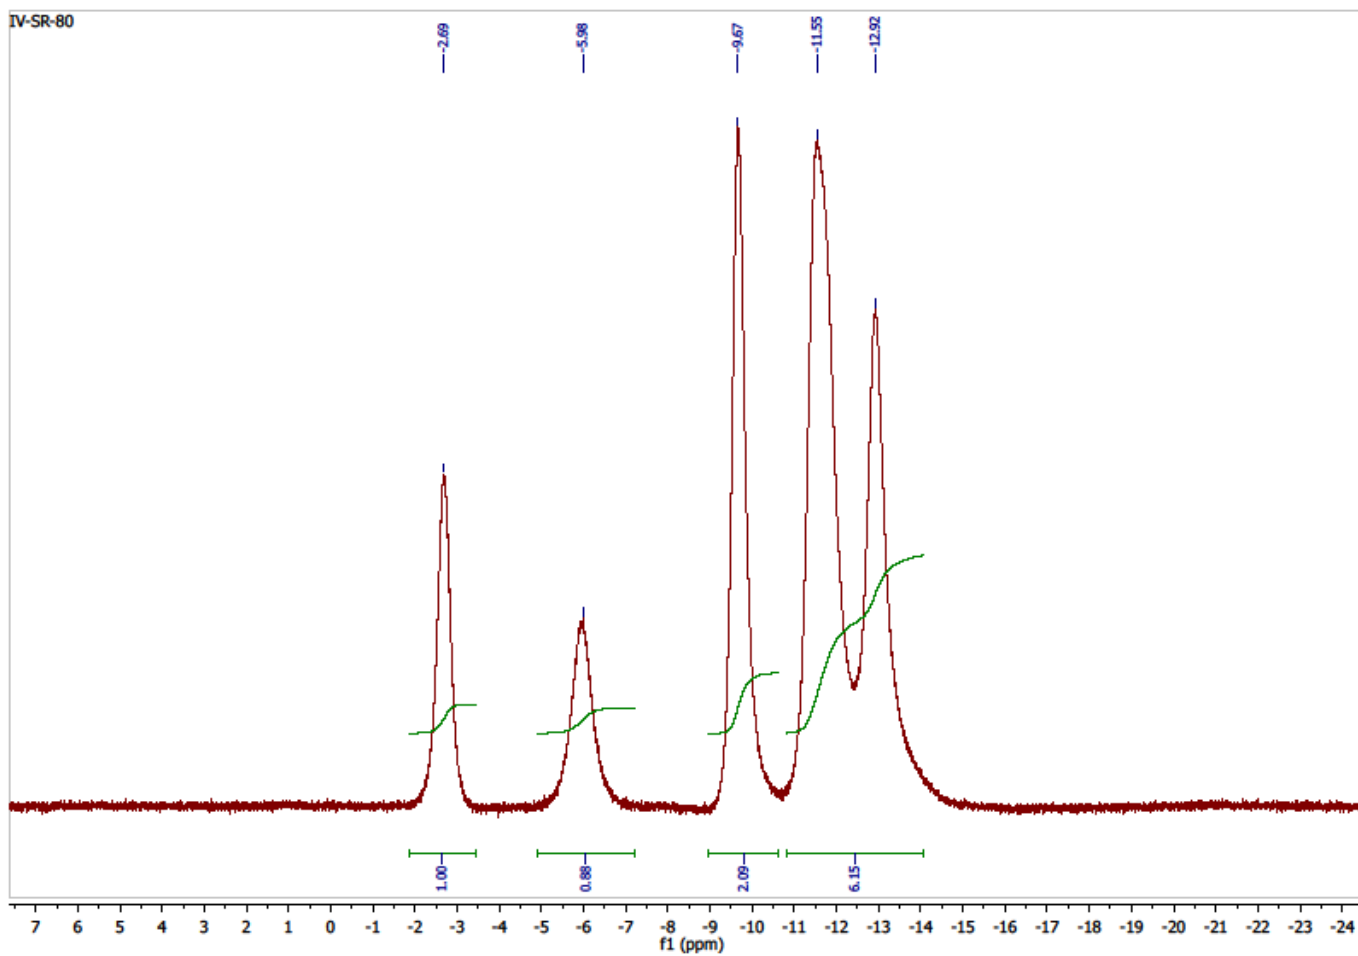

Figure S132.  $^{11}\text{B}$  NMR ( $^1\text{H}$  BB) spectrum of 39.

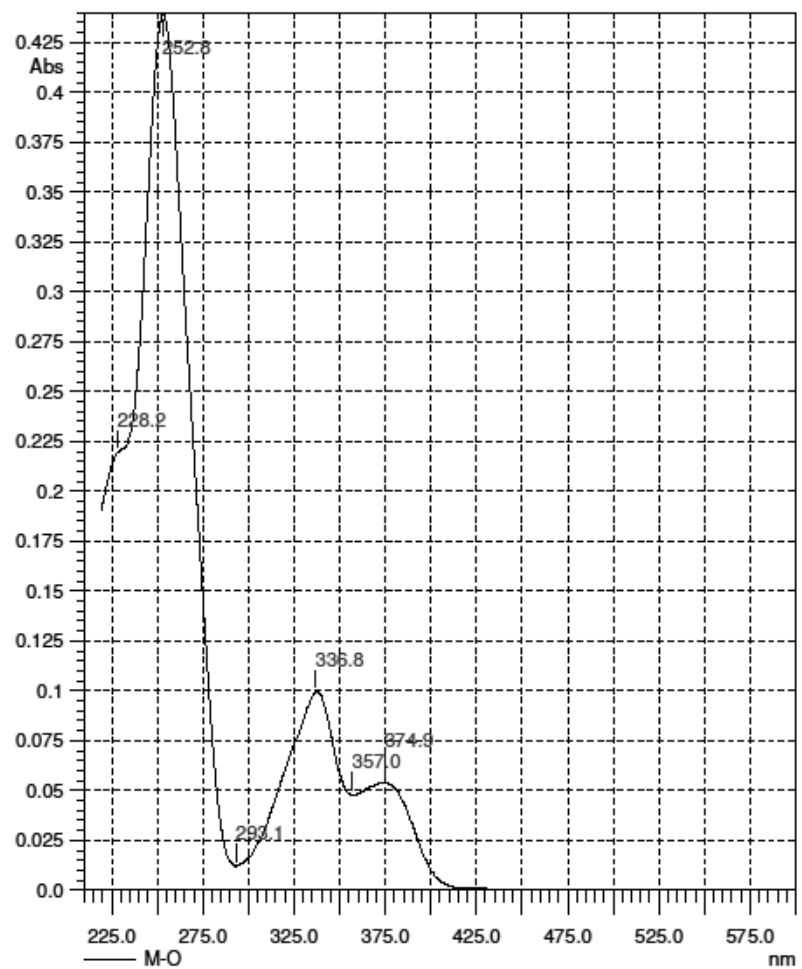

Figure S133. UV spectrum of 39.

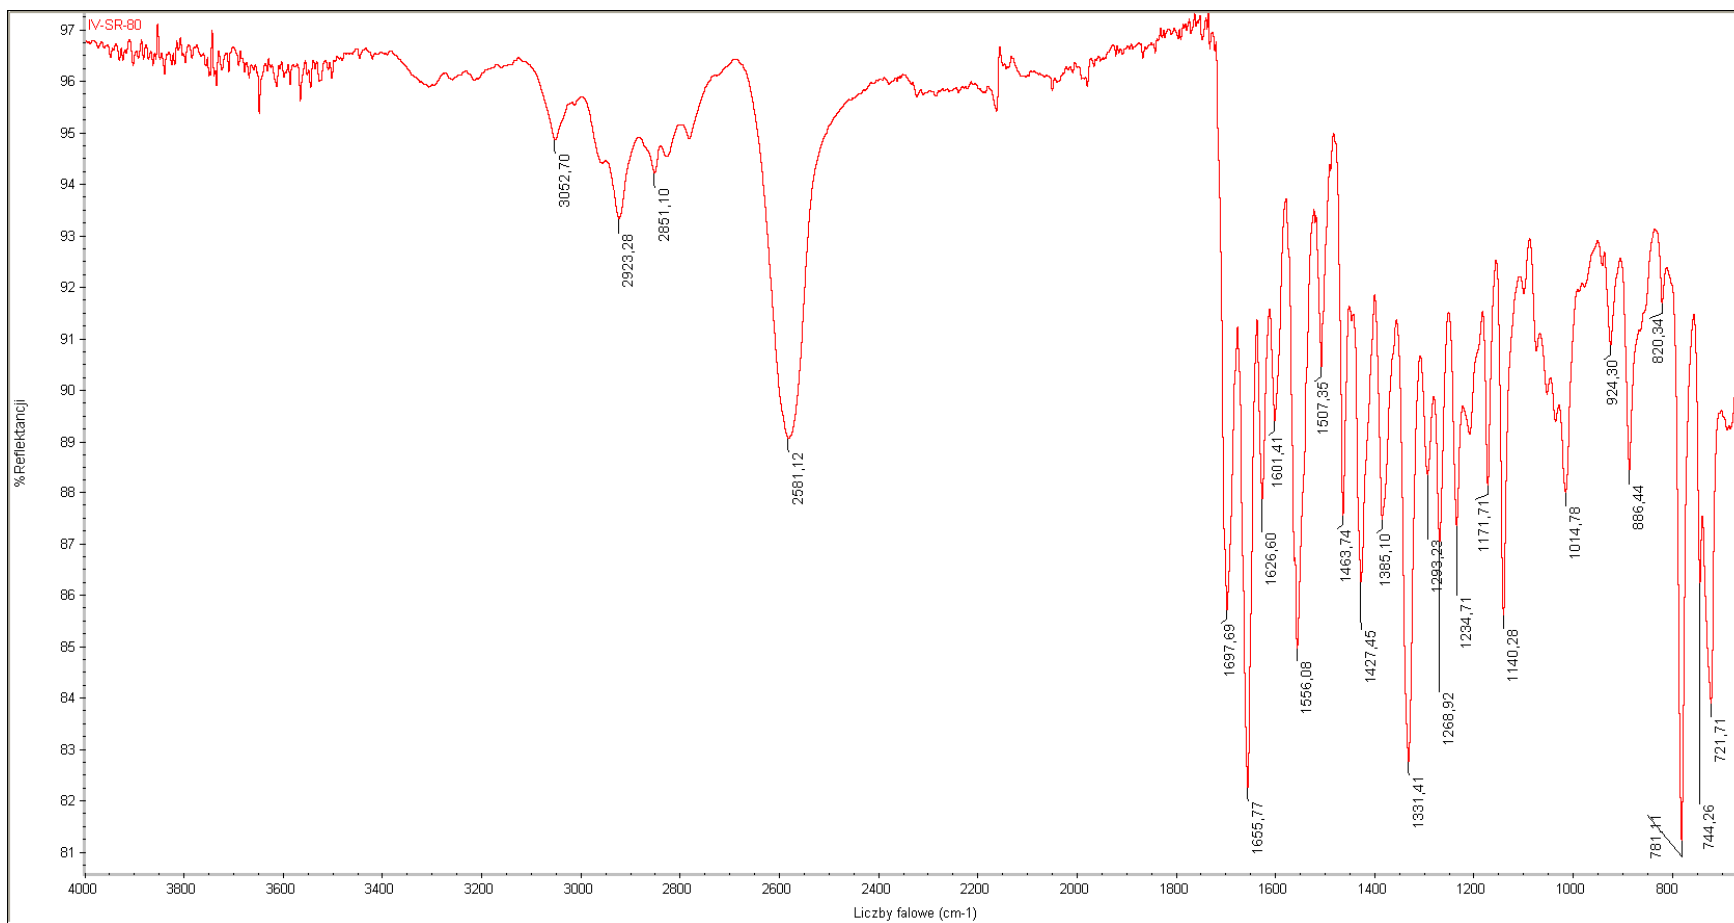

Figure S134. IR spectrum of 39.

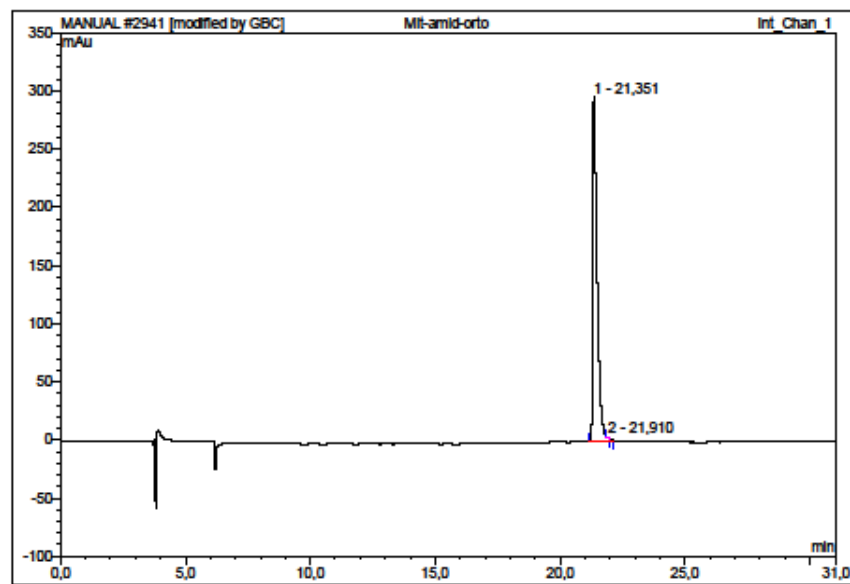

| No.           | Ret.Time<br>min | Peak Name | Height<br>mAu | Area<br>mAu*min | Rel.Area<br>% | Amount | Type |
|---------------|-----------------|-----------|---------------|-----------------|---------------|--------|------|
| 1             | 21,35           | n.a.      | 296,387       | 60,775          | 99,89         | n.a.   | BMB* |
| 2             | 21,91           | n.a.      | 0,740         | 0,068           | 0,11          | n.a.   | Rd*  |
| <b>Total:</b> |                 |           | 297,127       | 60,843          | 100,00        | 0,000  |      |

Figure S135. HPLC analysis of 39.

Spectrum Name: IV-SR-80  
Start Ion: 400  
End Ion: 600  
Source: APCI + 10.0µA 400C  
Capillary: 150V 300C Offset: 25V Span: 0V

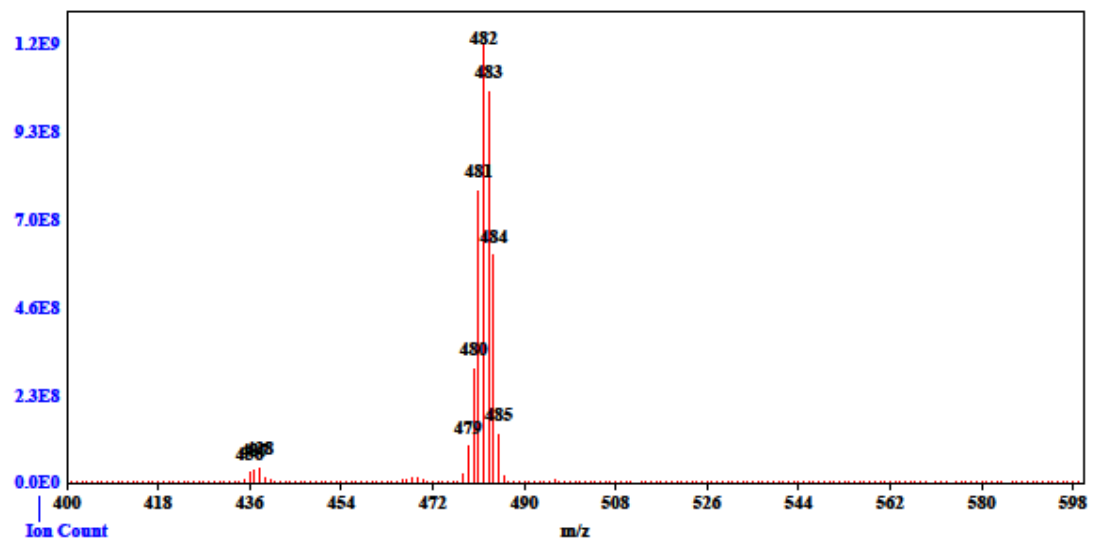

Figure S136. MS spectrum of 39.

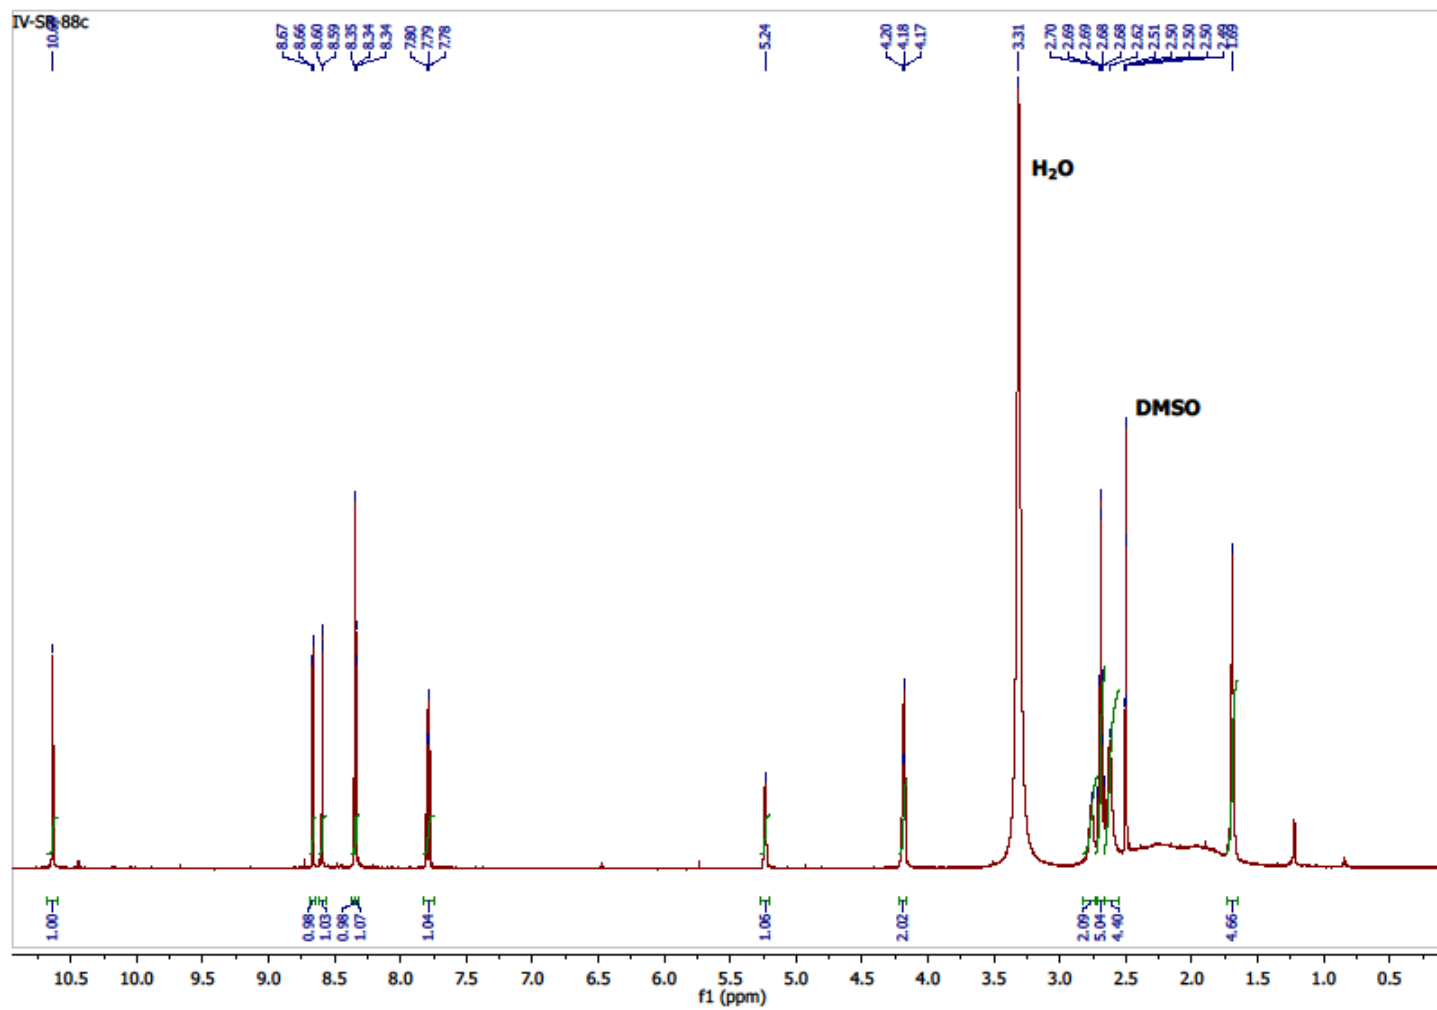

Figure S137. <sup>1</sup>H NMR spectrum of 40.

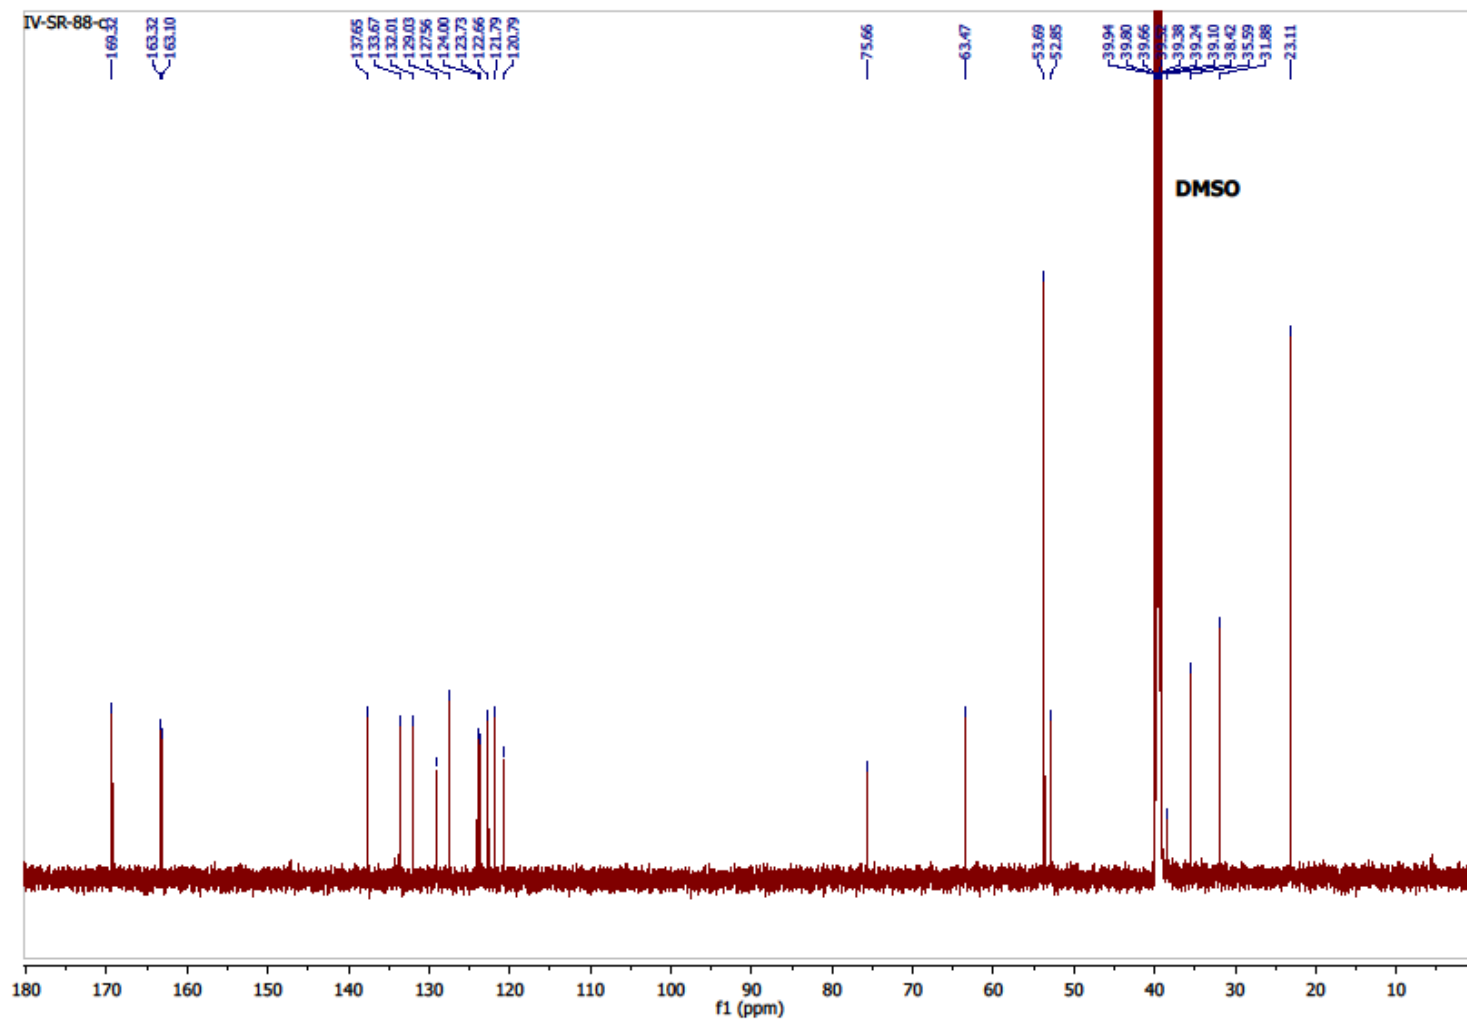

Figure S138.  $^{13}\text{C}$  NMR spectrum of 40.



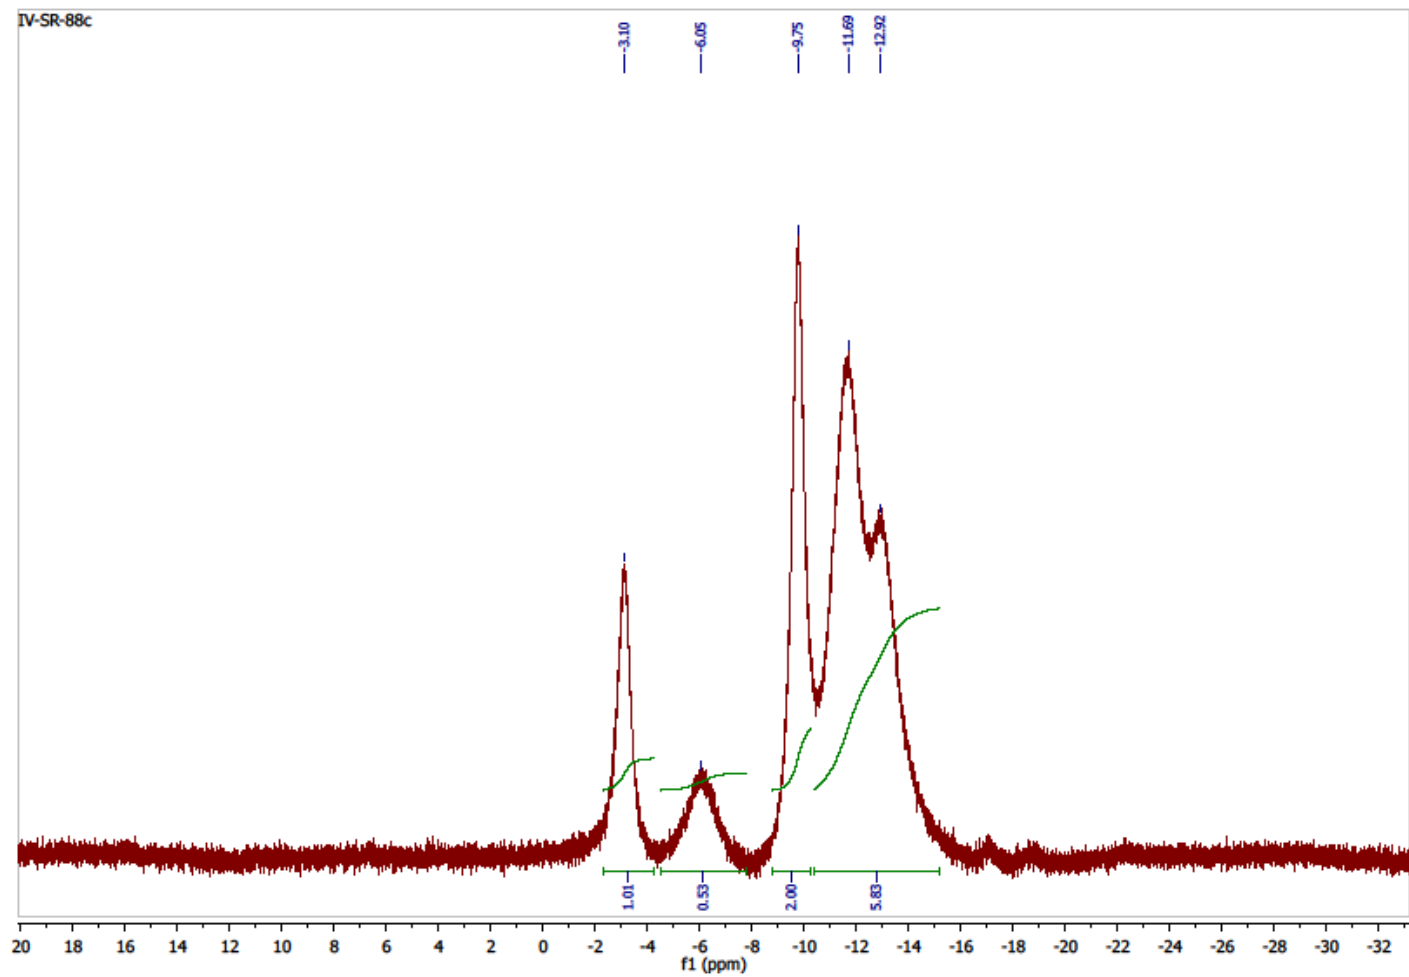

Figure S139.  $^{11}\text{B}$  NMR  $\{^1\text{H BB}\}$  spectrum of 40.

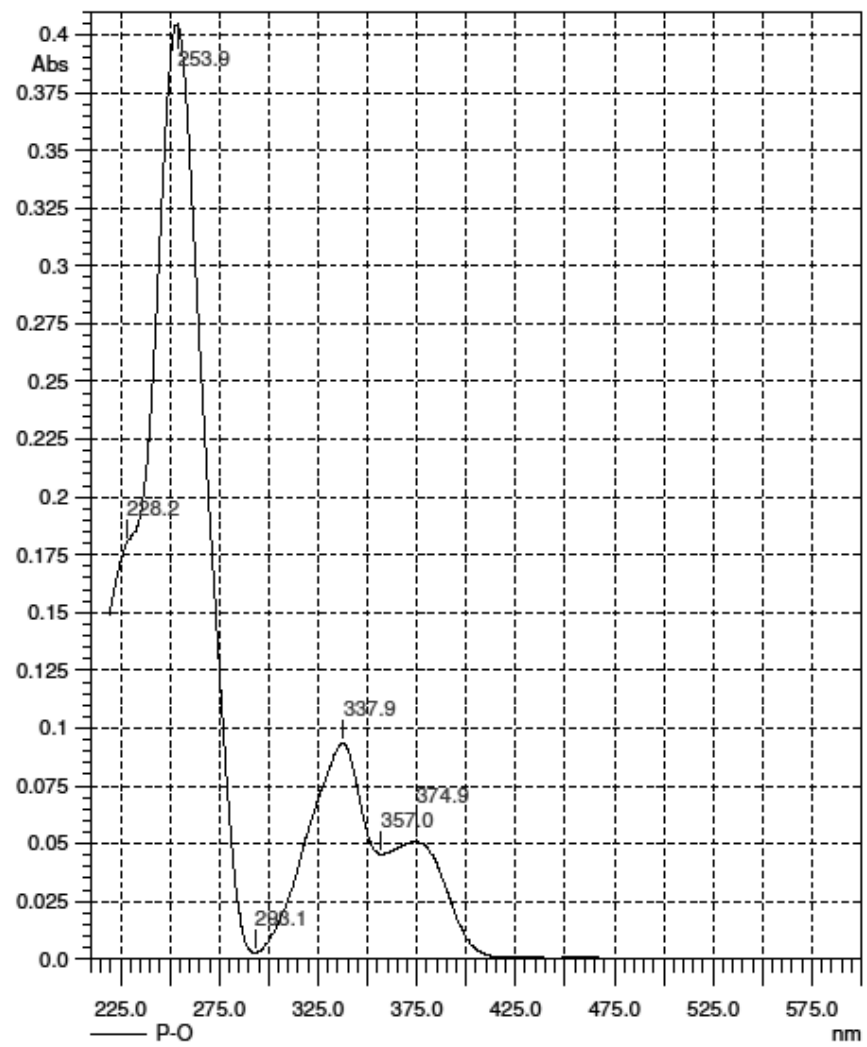

Figure S140. UV spectrum of 40.

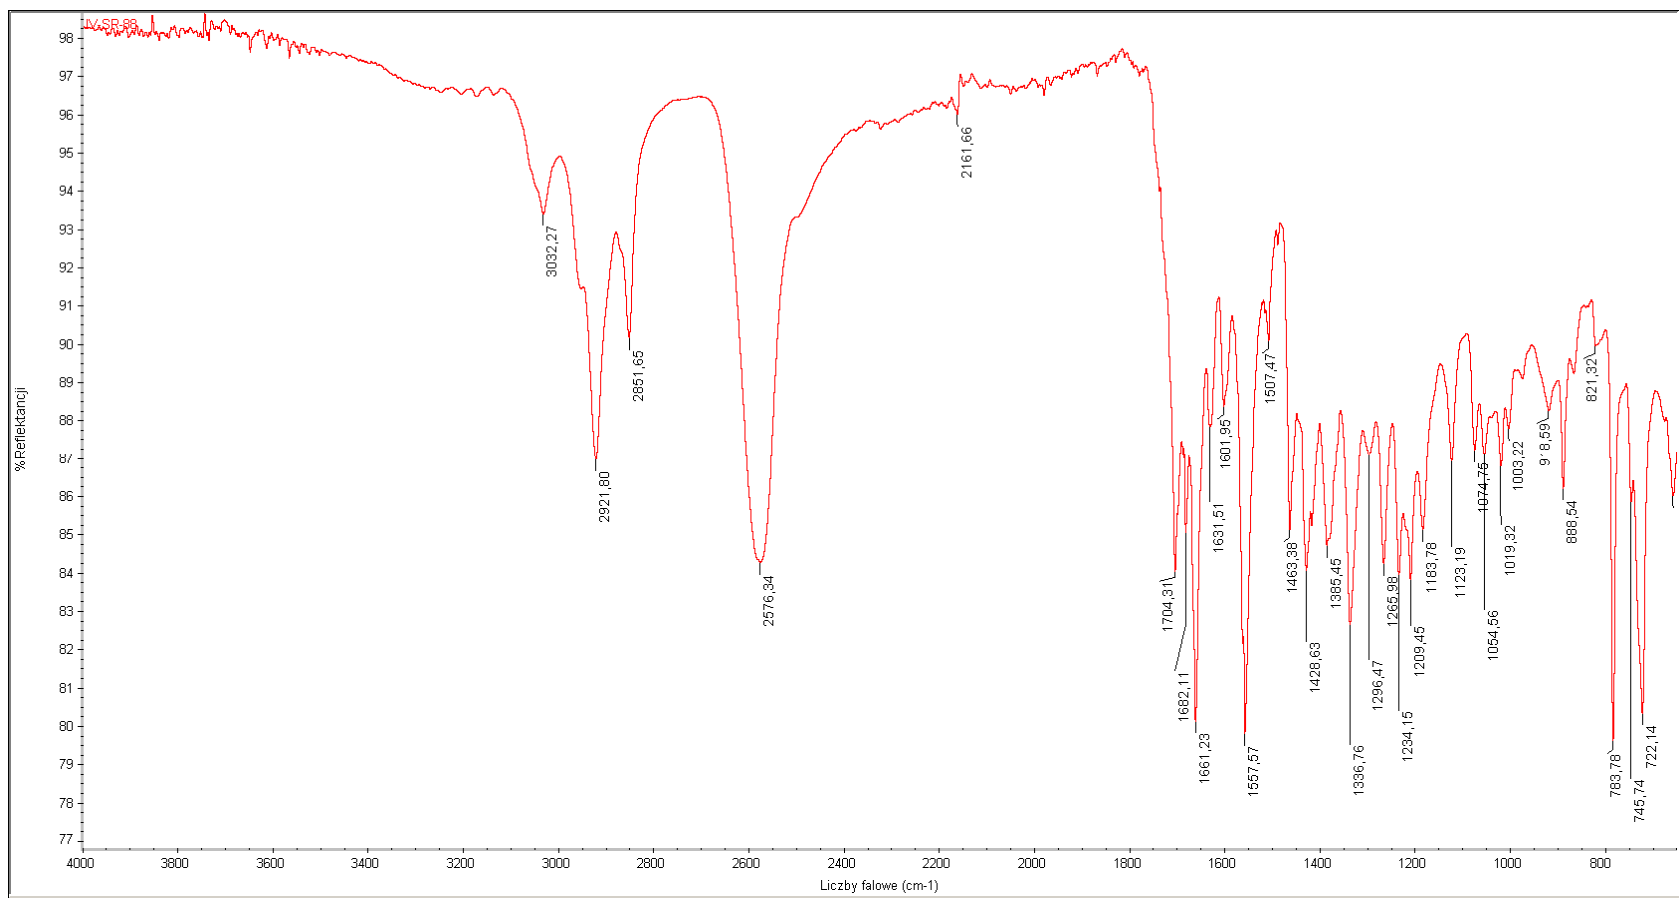

Figure S141. IR spectrum of 40.

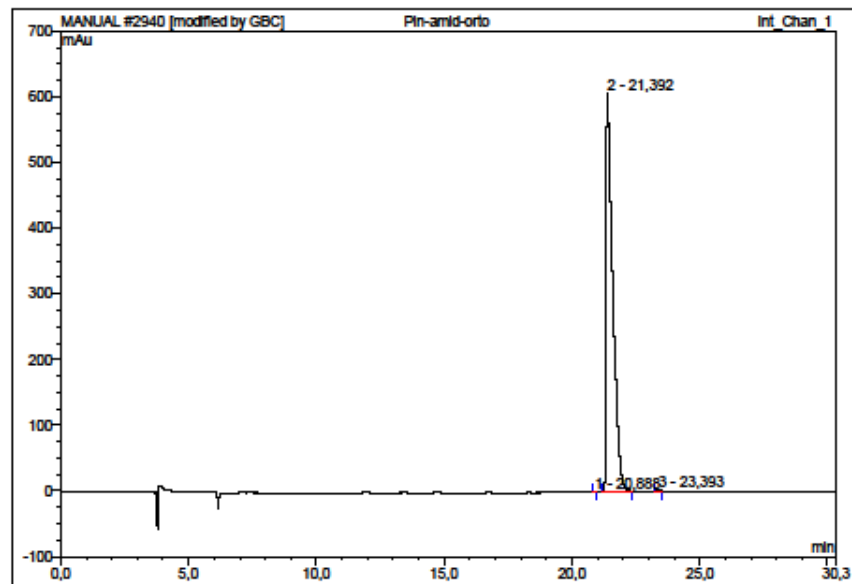

| No.           | Ret.Time<br>min | Peak Name | Height<br>mAu | Area<br>mAu*min | Rel.Area<br>% | Amount | Type |
|---------------|-----------------|-----------|---------------|-----------------|---------------|--------|------|
| 1             | 20,89           | n.a.      | 0,743         | 0,064           | 0,03          | n.a.   | BMB* |
| 2             | 21,39           | n.a.      | 606,469       | 181,277         | 99,65         | n.a.   | BMB  |
| 3             | 23,39           | n.a.      | 3,461         | 0,571           | 0,31          | n.a.   | BMB* |
| <b>Total:</b> |                 |           | 610,674       | 181,911         | 100,00        | 0,000  |      |

Figure S142. HPLC analysis of 40.

Spectrum Name: IV-SR-88  
Start Ion: 400  
End Ion: 600  
Source: APCI + 10.0µA 400C  
Capillary: 150V 300C Offset: 25V Span: 0V

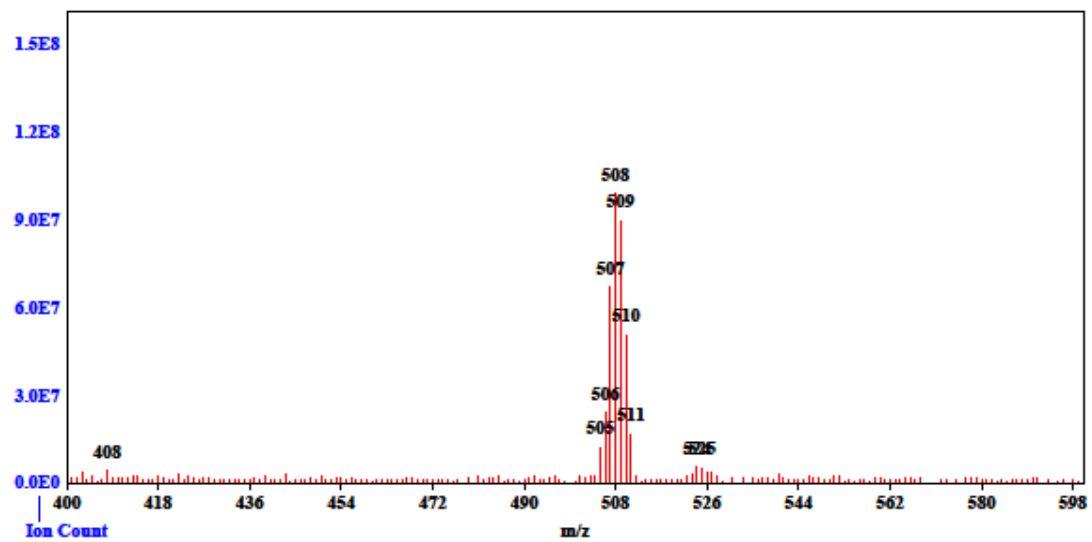

Figure S143. MS spectrum of 40.

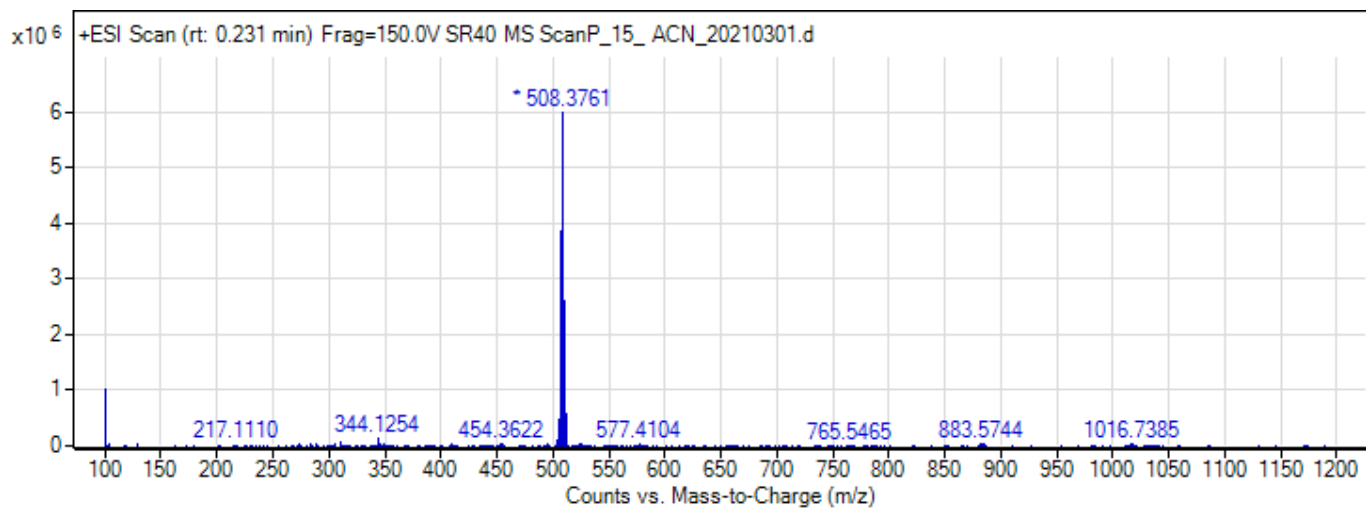

Figure S144. HRMS spectrum of 40.

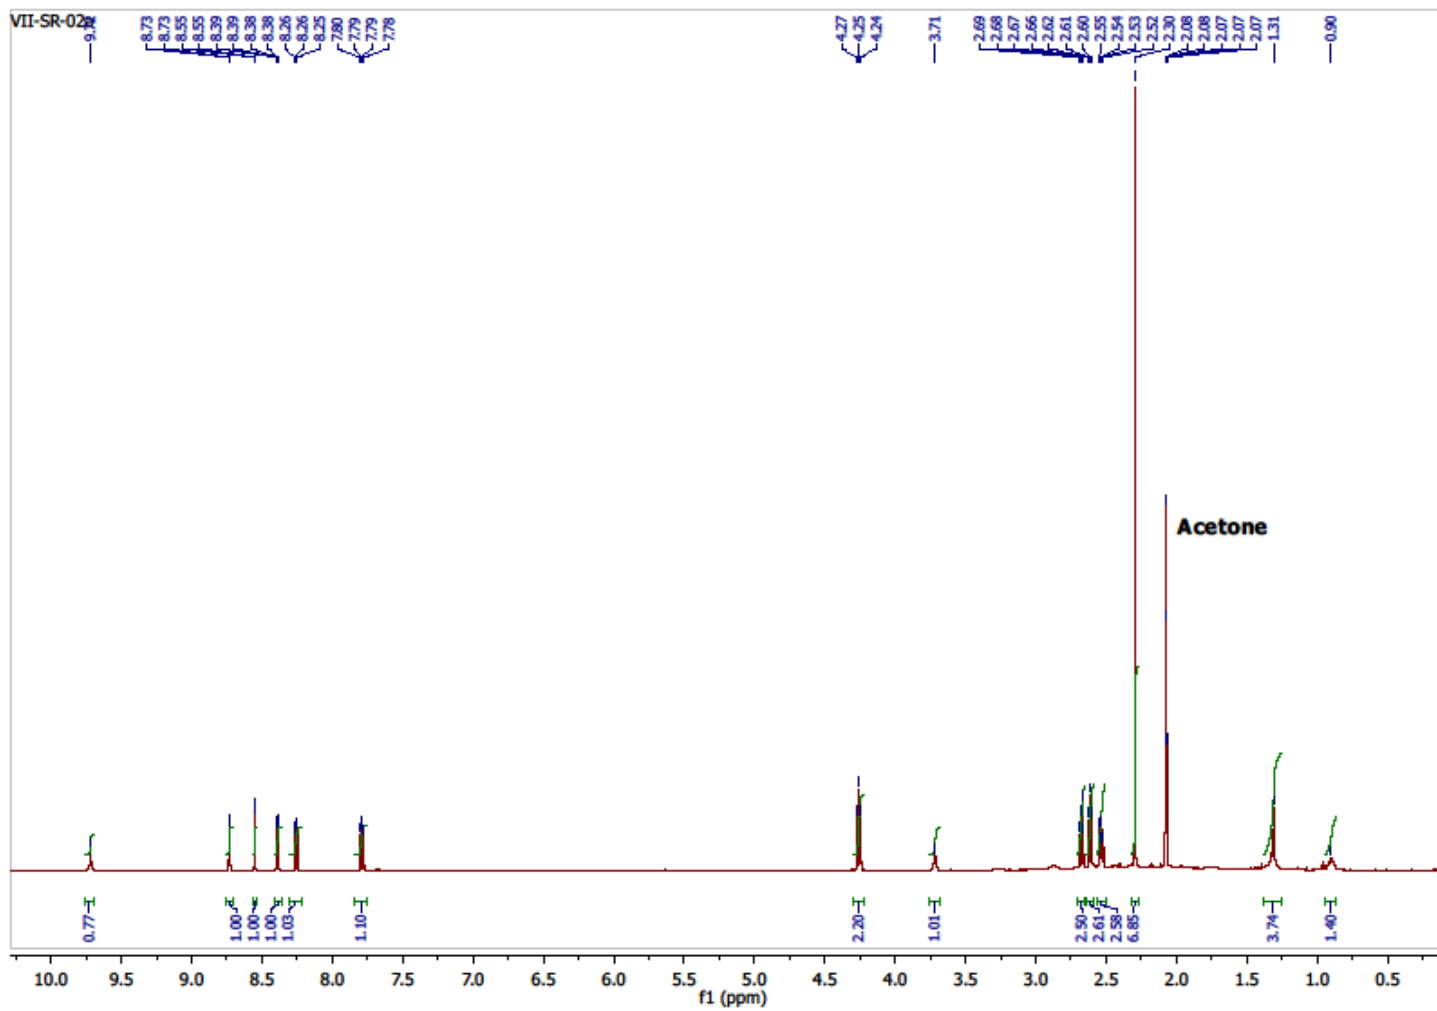

Figure S145.  $^1\text{H}$  NMR spectrum of **41**.

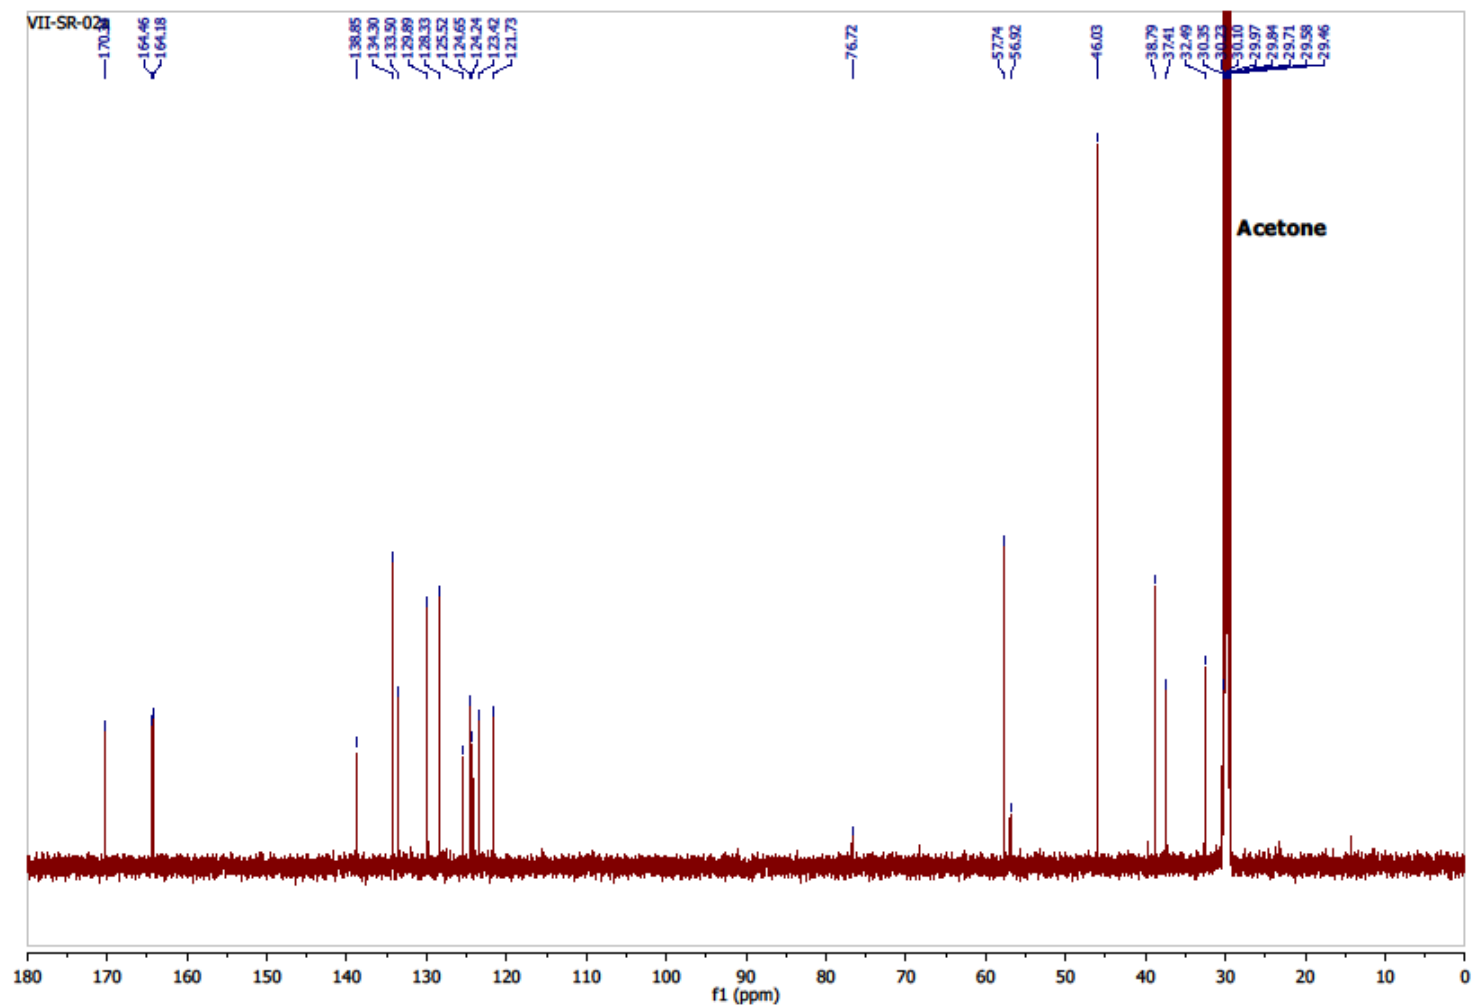

Figure S146.  $^{13}\text{C}$  NMR spectrum of 41.



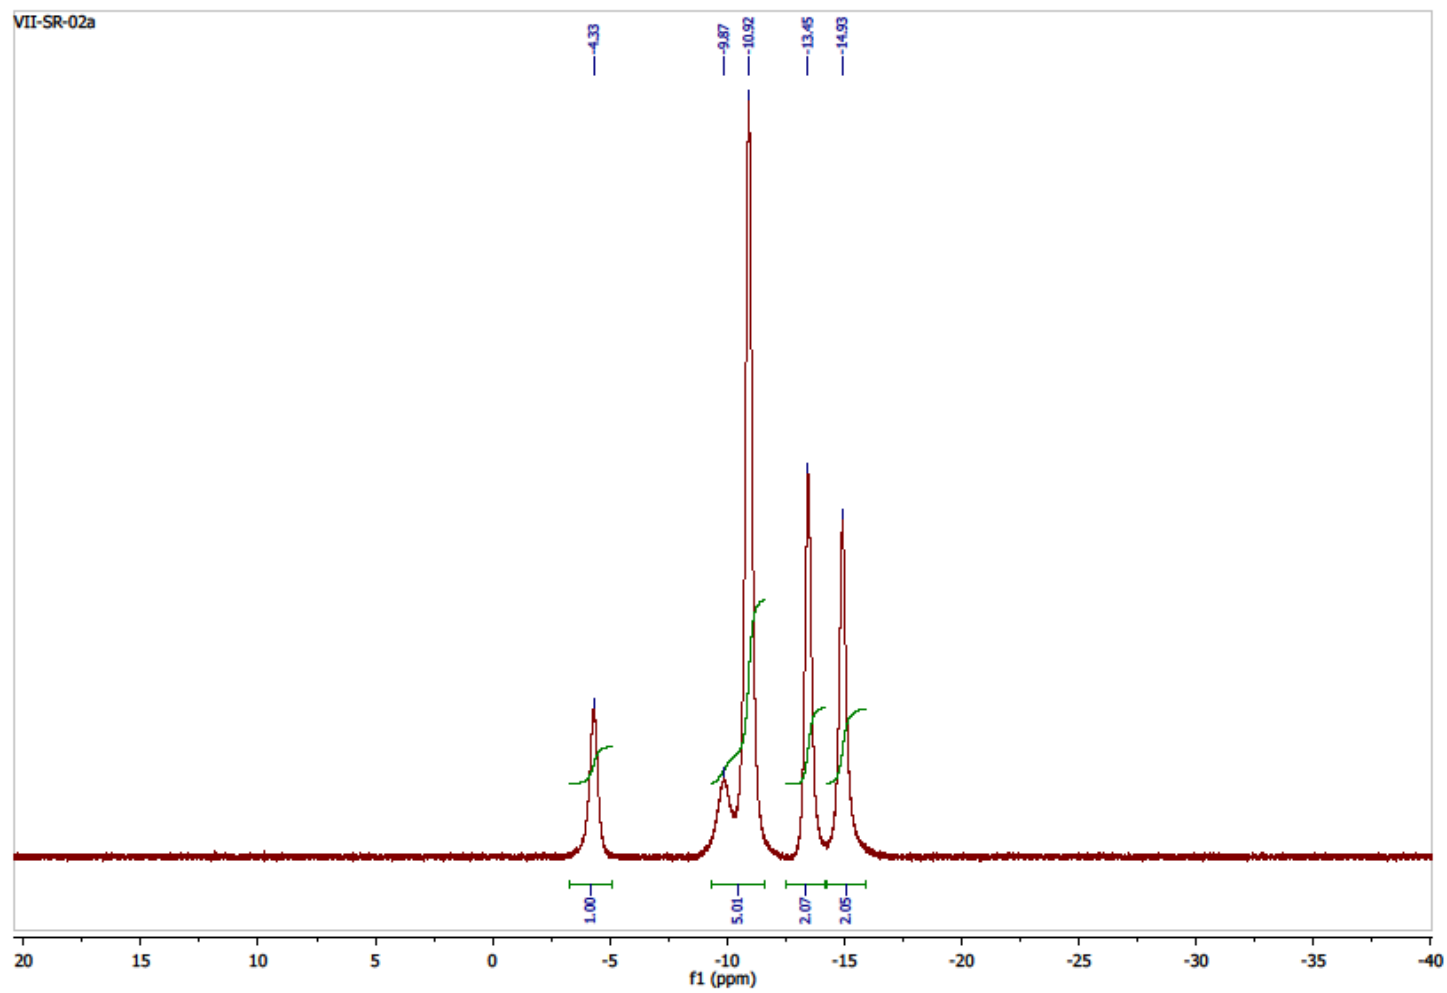

Figure S147. IR spectrum of 41.

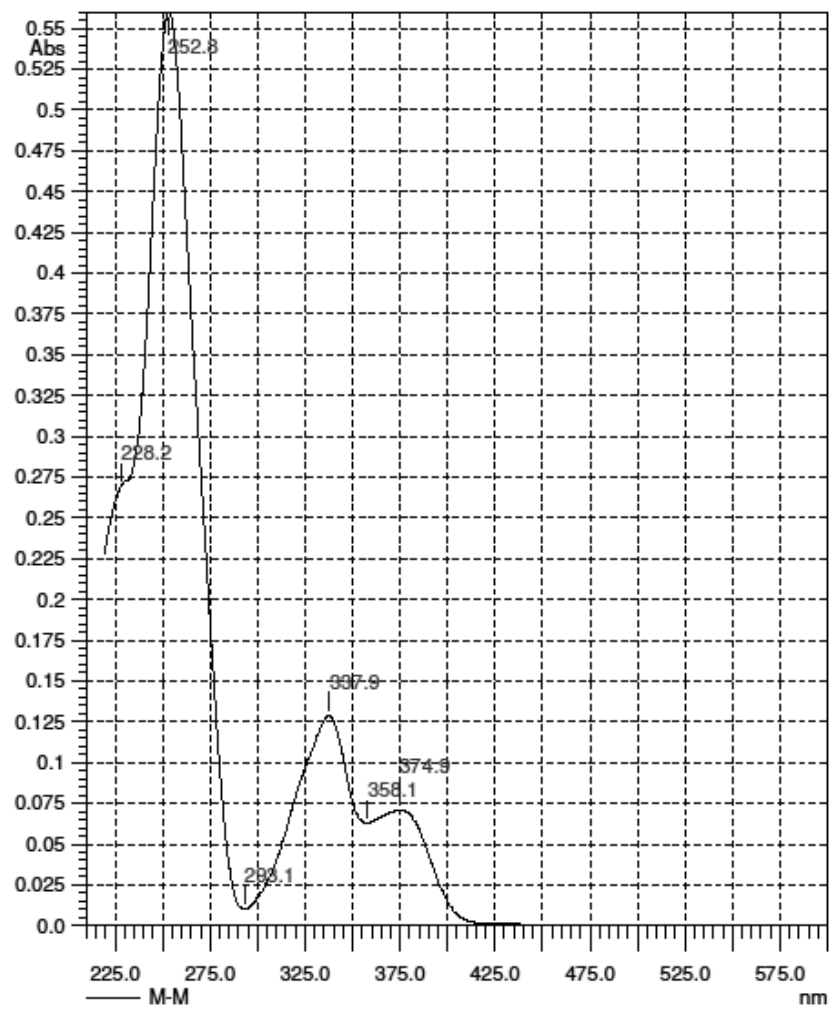

Figure S148. UV spectrum of 41.

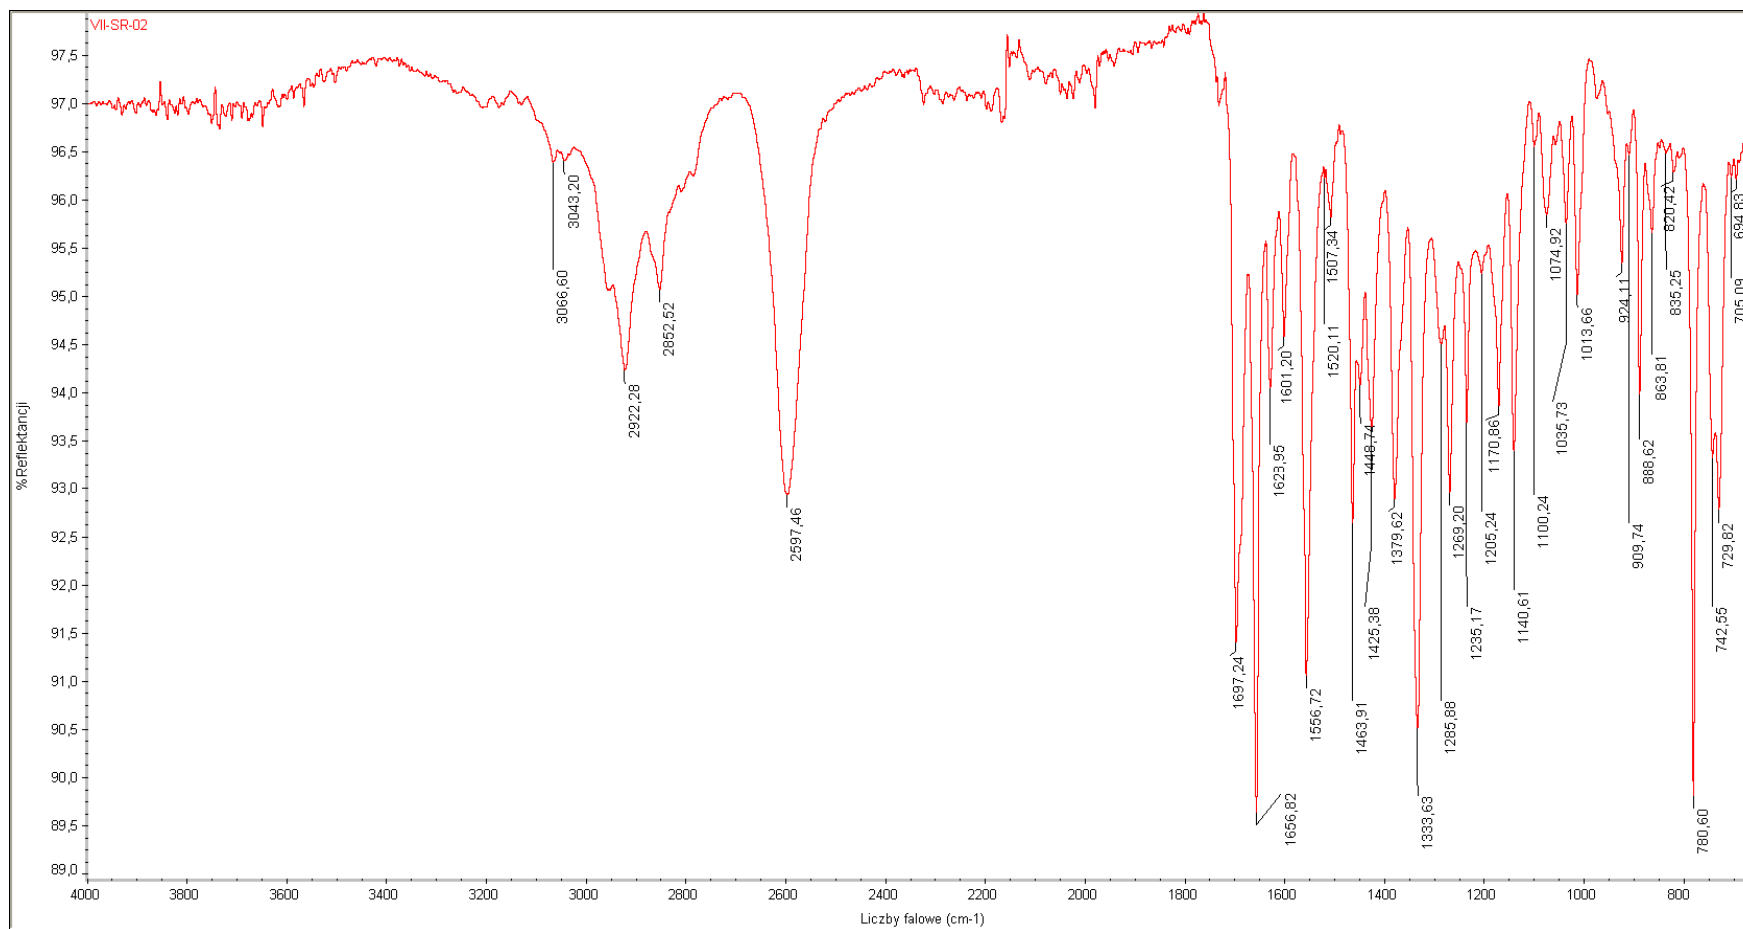

Figure S149. IR spectrum of 41.

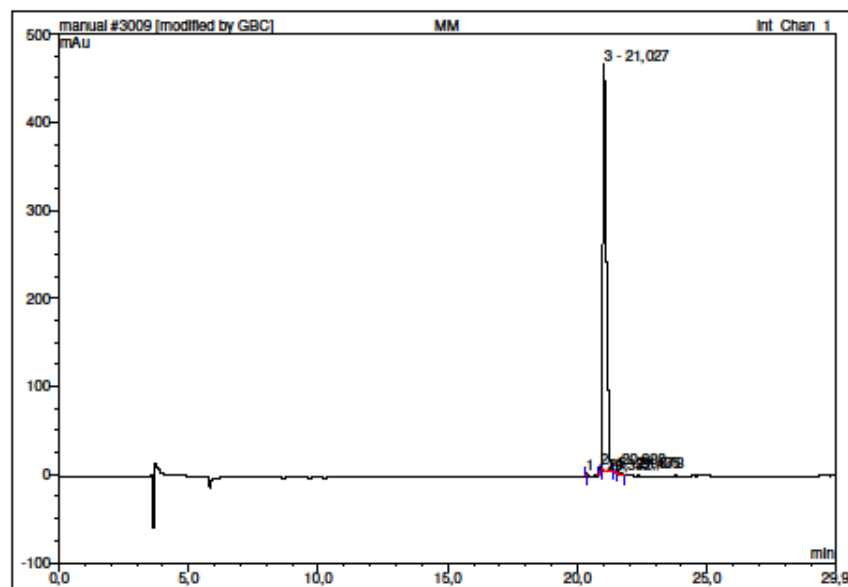

| No.           | Ret.Time<br>min | Peak Name | Height<br>mAu | Area<br>mAu*min | Rel.Area<br>% | Amount | Type |
|---------------|-----------------|-----------|---------------|-----------------|---------------|--------|------|
| 1             | 20,33           | n.a.      | 3,809         | 0,284           | 0,39          | n.a.   | BMB* |
| 2             | 20,88           | n.a.      | 6,404         | 0,384           | 0,52          | n.a.   | BMB* |
| 3             | 21,03           | n.a.      | 460,312       | 72,780          | 98,54         | n.a.   | bMB* |
| 4             | 21,44           | n.a.      | 1,057         | 0,068           | 0,09          | n.a.   | BMB* |
| 5             | 21,58           | n.a.      | 2,437         | 0,339           | 0,46          | n.a.   | BMB* |
| <b>Total:</b> |                 |           | 474,019       | 73,856          | 100,00        | 0,000  |      |

Figure S150. HPLC analysis of 41.

Spectrum Name: VII-SR-02  
Start Ion: 400  
End Ion: 570  
Source: APCI + 10.0µA 400C  
Capillary: 150V 300C Offset: 25V Span: 0V

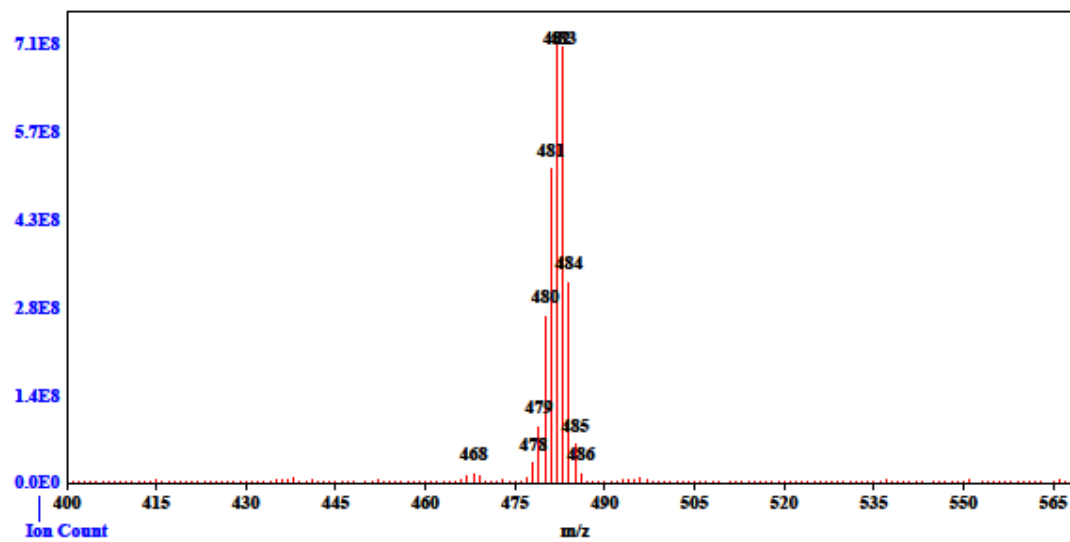

Figure S151. MS spectrum of 41.

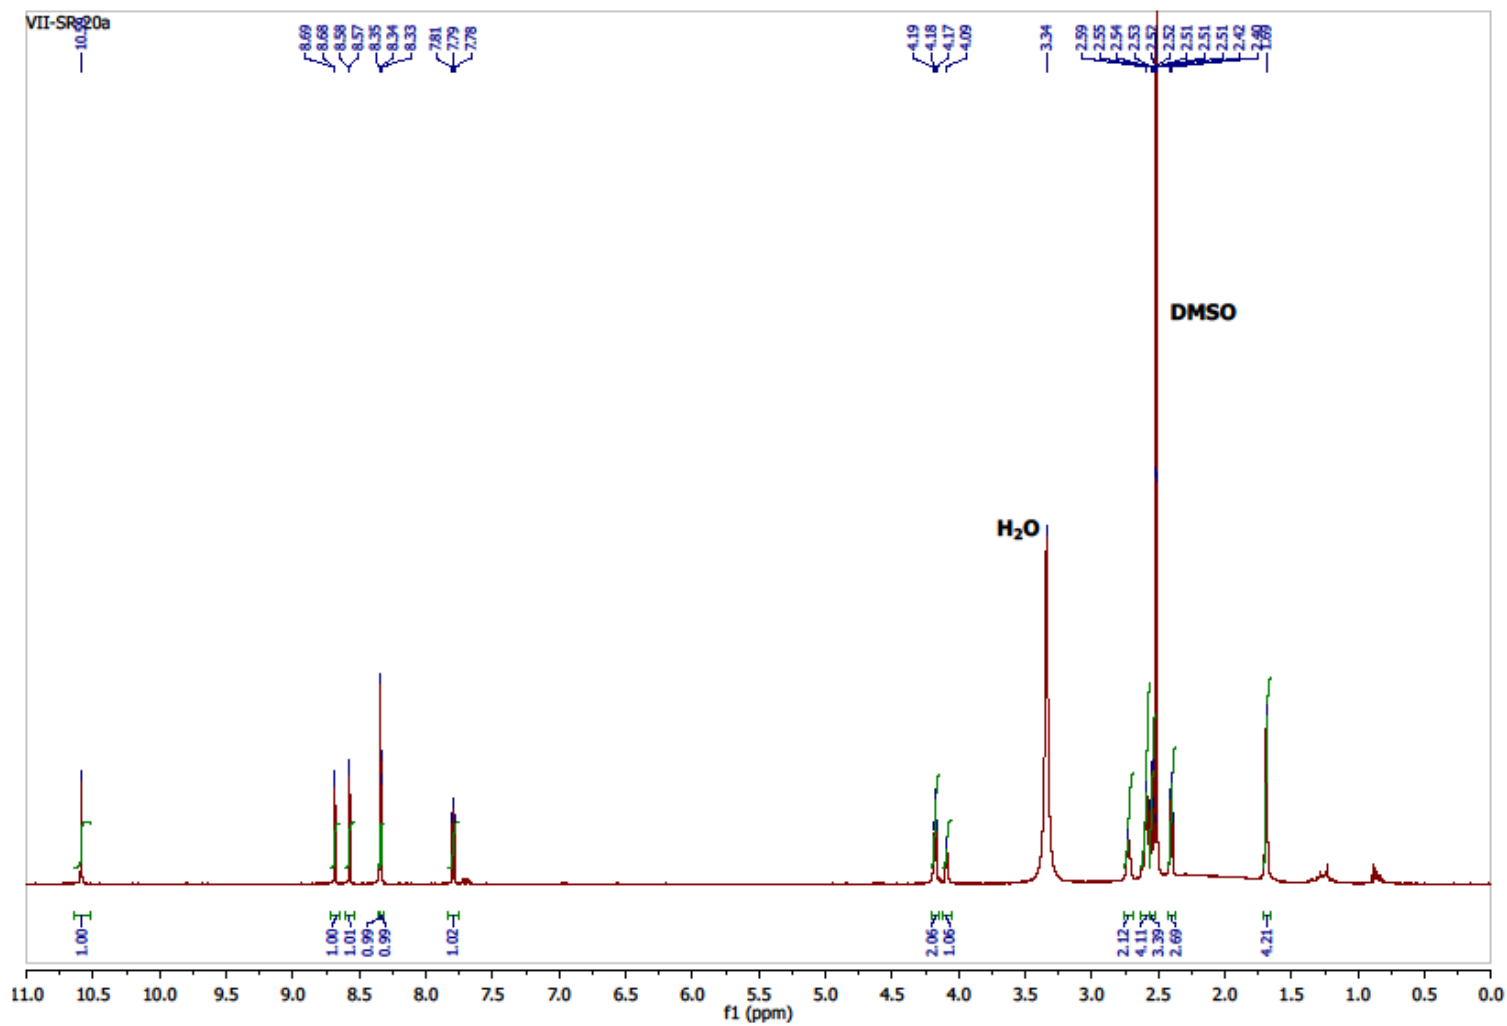

Figure S152. <sup>1</sup>H NMR spectrum of 42.

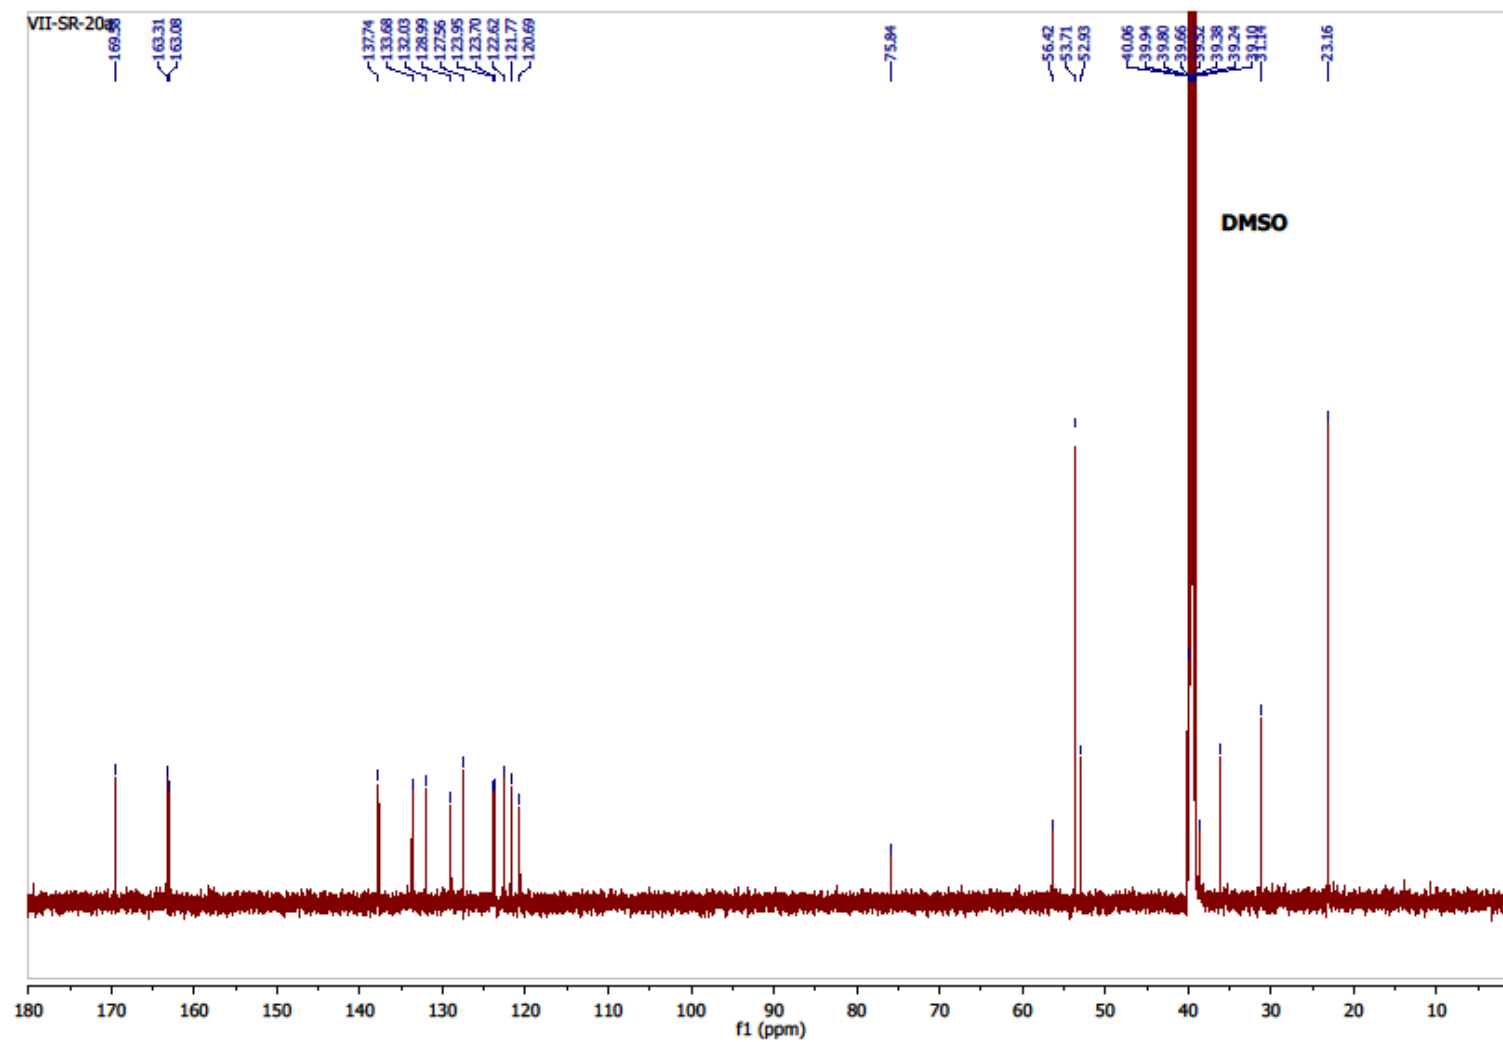

Figure S153. <sup>13</sup>C NMR spectrum of 42.

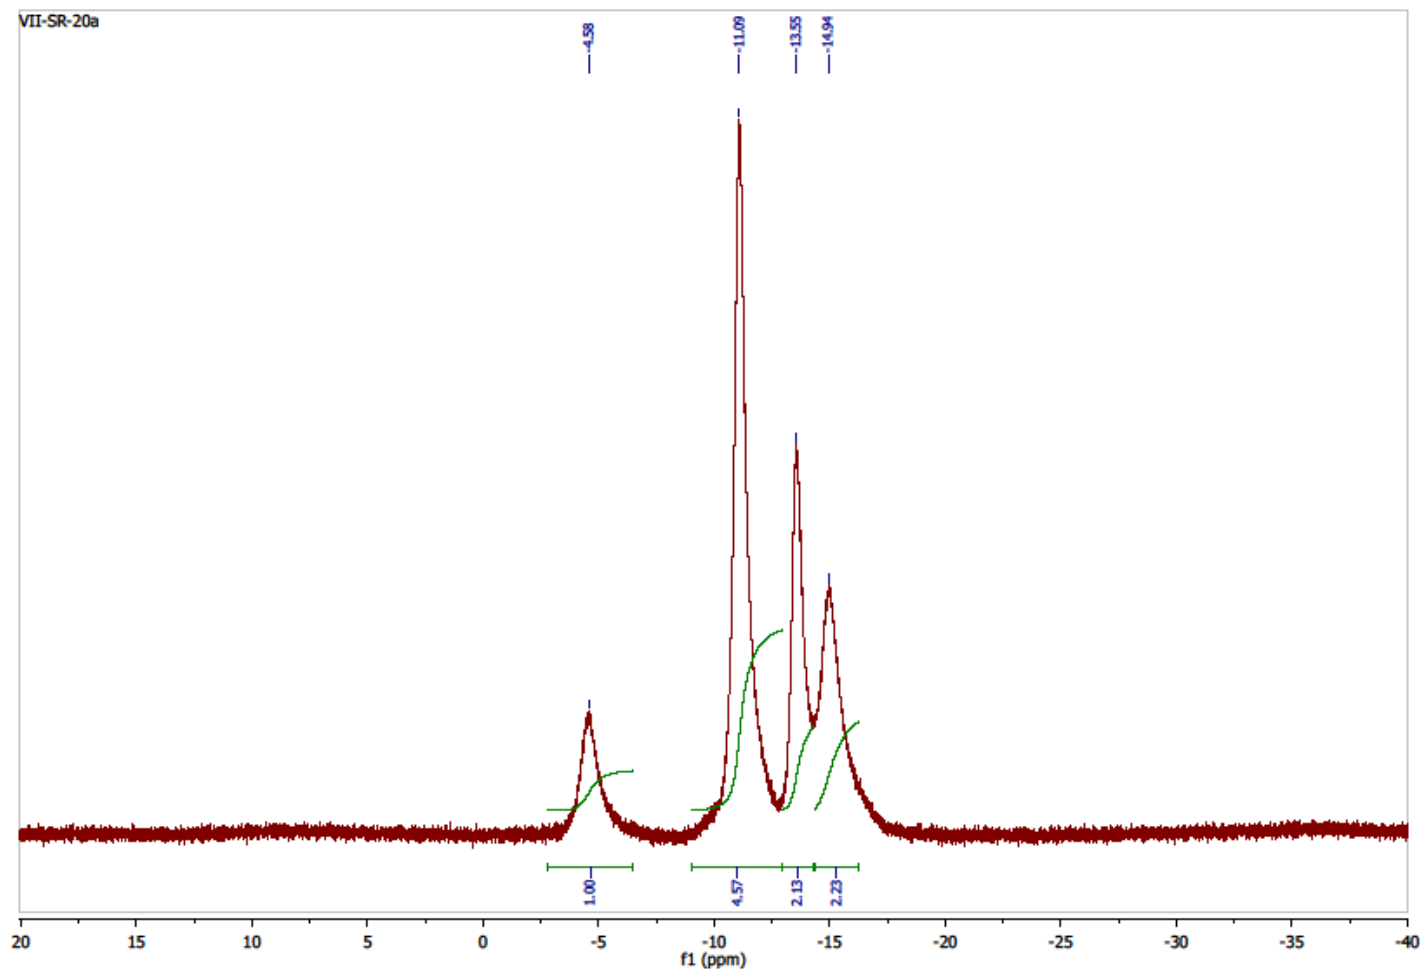

Figure S154. IR spectrum of 42.



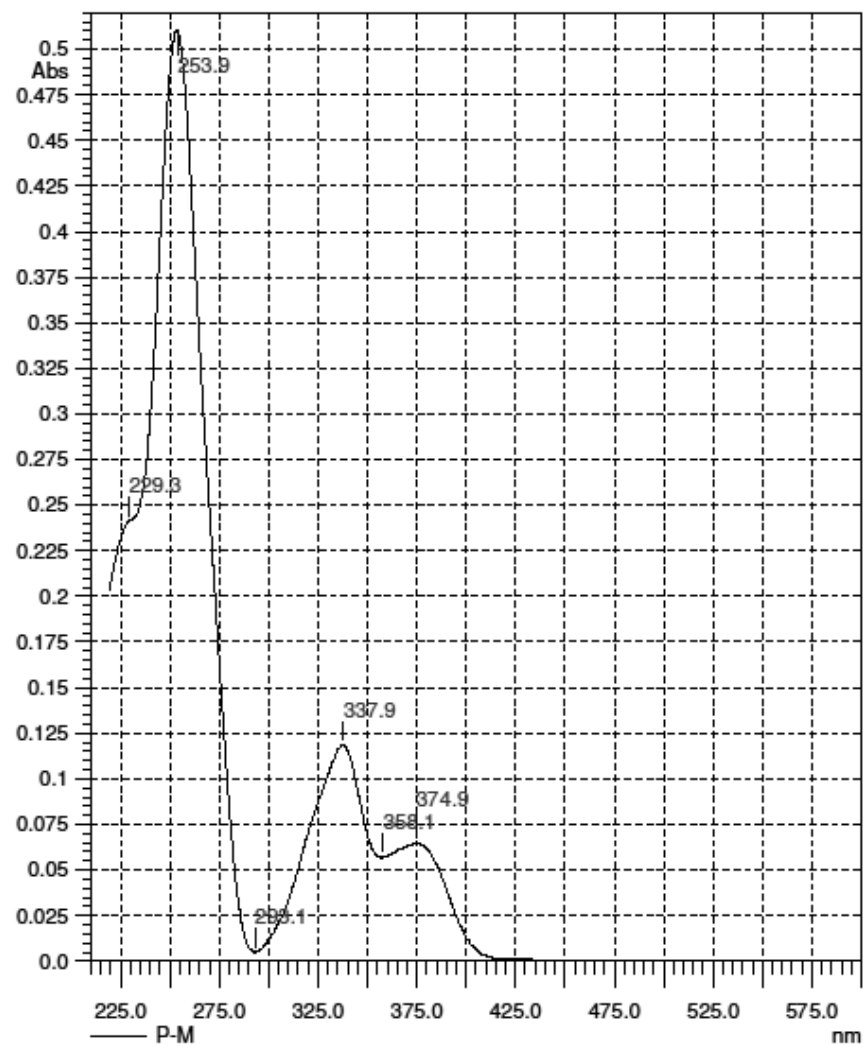

Figure S155. UV spectrum of 42.

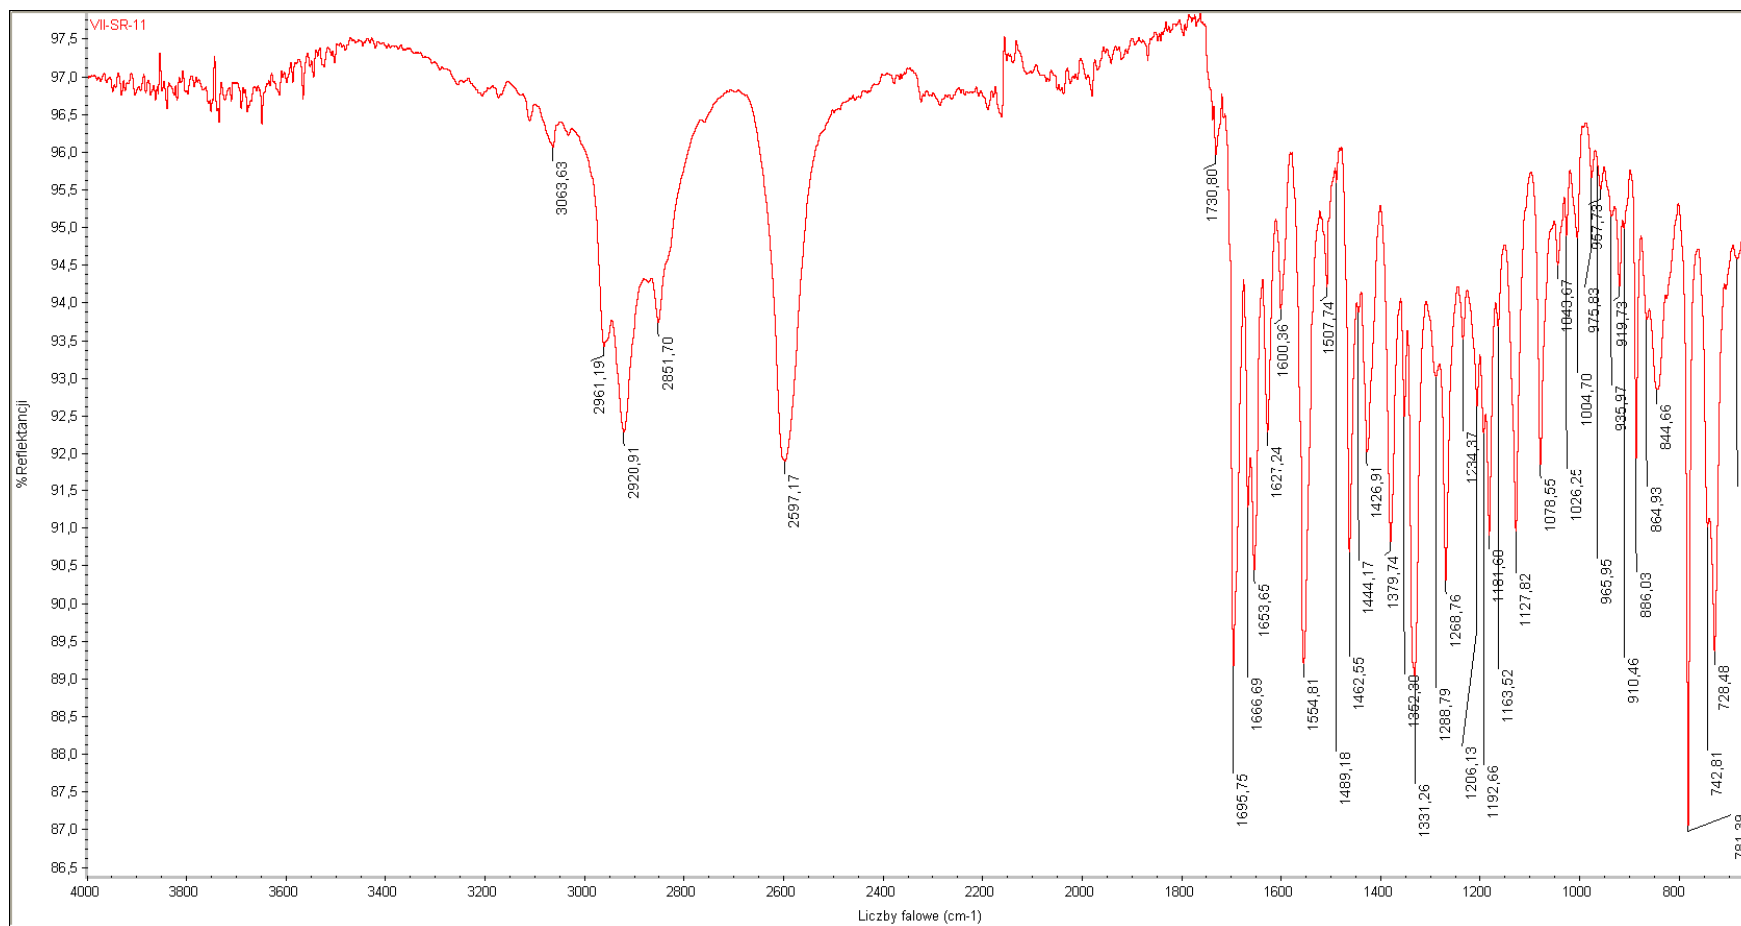

Figure S156. IR spectrum of 42.

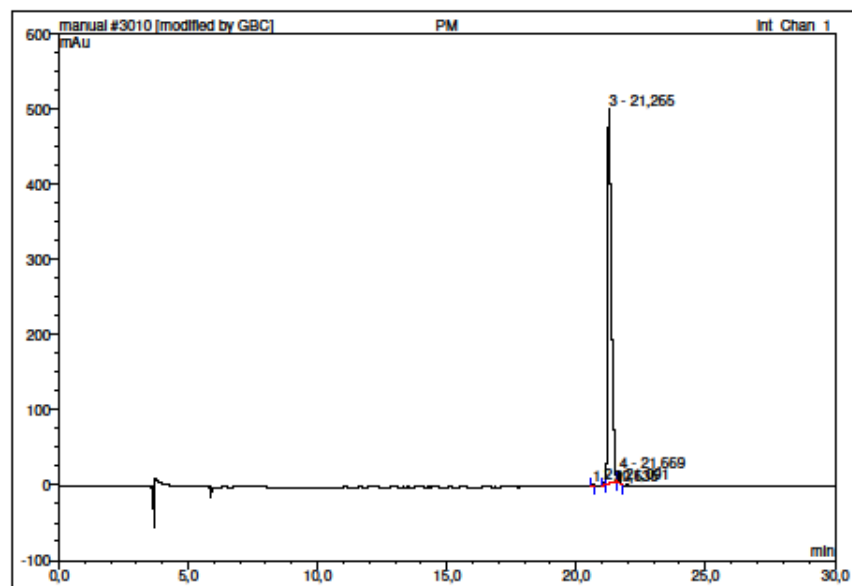

| No.           | Ret. Time<br>min | Peak Name | Height<br>mAu | Area<br>mAu*min | Rel. Area<br>% | Amount | Type |
|---------------|------------------|-----------|---------------|-----------------|----------------|--------|------|
| 1             | 20,63            | n.a.      | 2,620         | 0,196           | 0,23           | n.a.   | BMB* |
| 2             | 21,09            | n.a.      | 2,455         | 0,155           | 0,18           | n.a.   | BMB* |
| 3             | 21,27            | n.a.      | 499,429       | 85,637          | 98,17          | n.a.   | BMB  |
| 4             | 21,67            | n.a.      | 14,407        | 1,245           | 1,43           | n.a.   | BMB* |
| <b>Total:</b> |                  |           | 518,910       | 87,233          | 100,00         | 0,000  |      |

Figure S157. HPLC analysis of 42.

Spectrum Name: VII-SR-11  
Start Ion: 400  
End Ion: 600  
Source: APCI + 10.0µA 400C  
Capillary: 150V 300C Offset: 25V Span: 0V

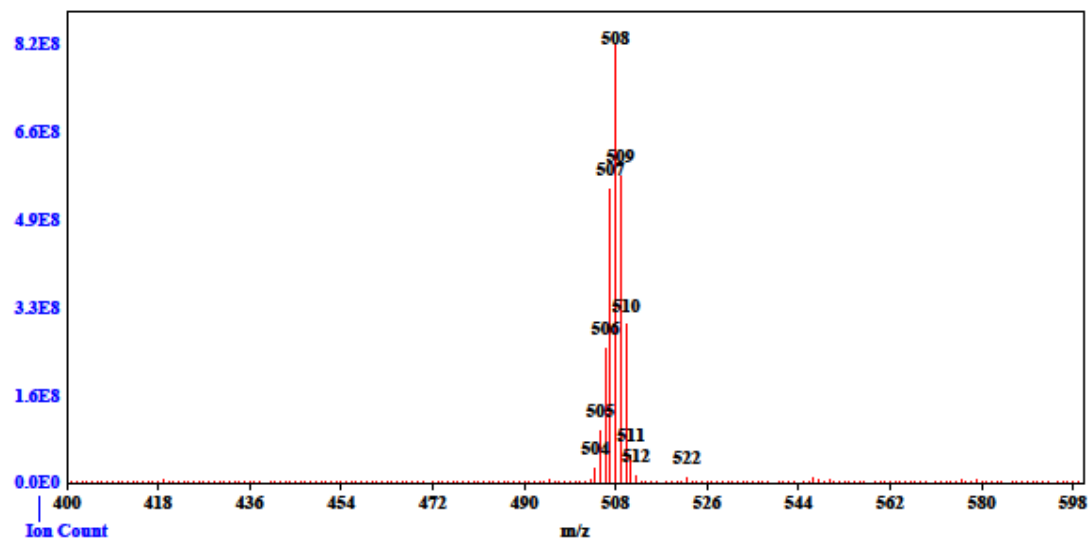

Figure S158. MS spectrum of 42.

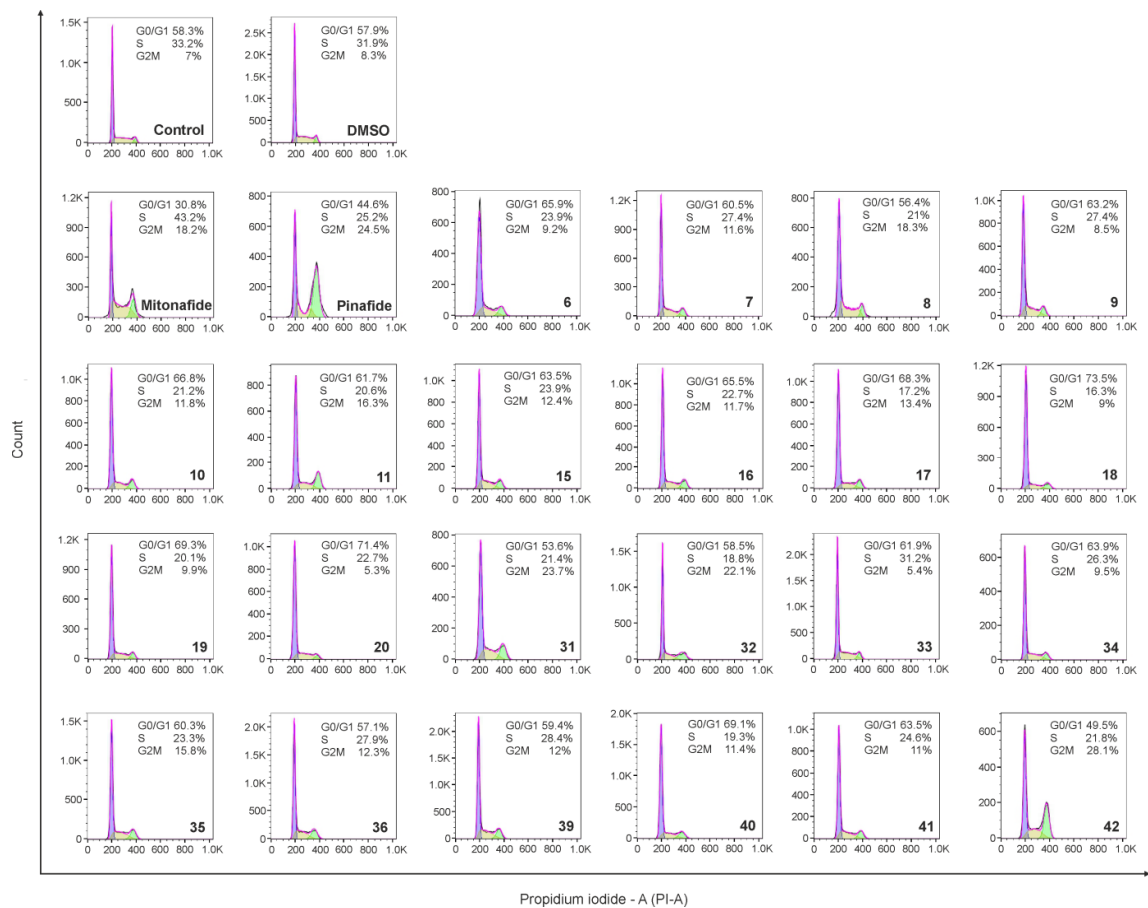

**Figure S159.** Influence of compound 6 (115  $\mu$ M), 7 (104  $\mu$ M), 8 (4  $\mu$ M), 9 (3  $\mu$ M), 10 (8  $\mu$ M), 11 (5  $\mu$ M), 15 (68  $\mu$ M), 16 (61  $\mu$ M), 17 (10  $\mu$ M), 18 (15  $\mu$ M), 19 (14  $\mu$ M), 20 (12  $\mu$ M), 31, (53  $\mu$ M), 32 (42  $\mu$ M), 33 (5  $\mu$ M), 34 (8  $\mu$ M), 35 (9  $\mu$ M), 36 (6  $\mu$ M), 39 (11  $\mu$ M), 40 (13  $\mu$ M), 41 (10  $\mu$ M), 42 (6  $\mu$ M) on cell cycle distribution in HepG2 cells. Flow cytometry analysis of cells treated for 24 h with tested compounds. One representative experiment of three is shown.

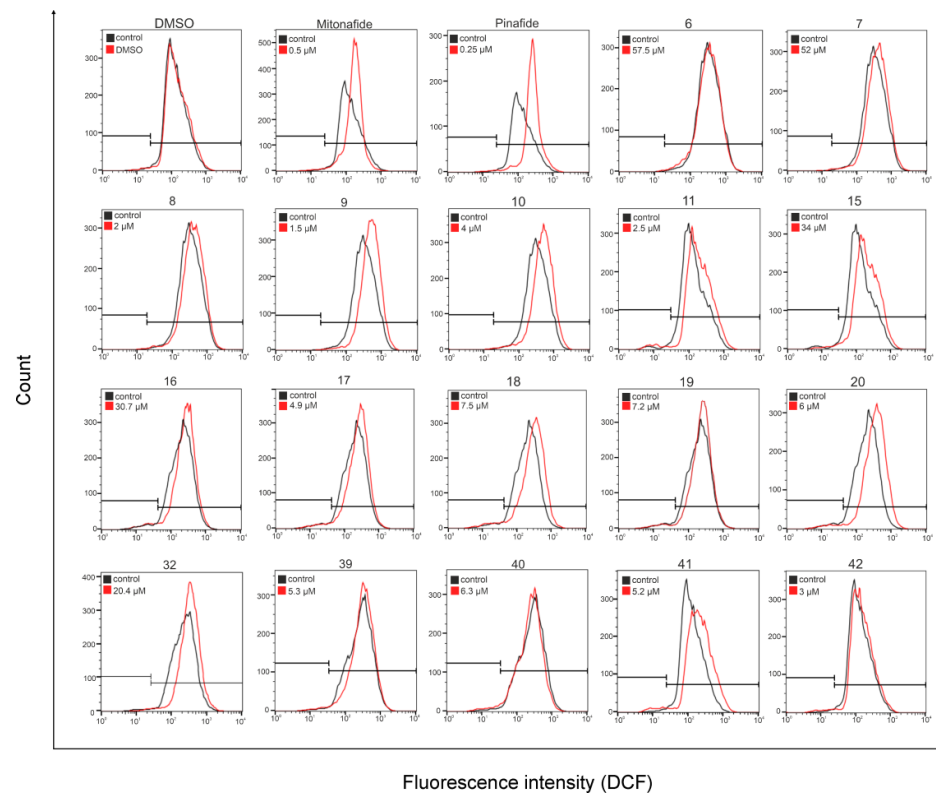

**Figure S160.** ROS production in HepG2 cells after 24 h incubation with compound **6** (57.5  $\mu\text{M}$ ), **7** (52  $\mu\text{M}$ ), **8** (2  $\mu\text{M}$ ), **9** (1.5  $\mu\text{M}$ ), **10** (4  $\mu\text{M}$ ), **11** (2.5  $\mu\text{M}$ ), **15** (34  $\mu\text{M}$ ), **16** (30.7  $\mu\text{M}$ ), **17** (4.9  $\mu\text{M}$ ), **18** (7.5  $\mu\text{M}$ ), **19** (7.2  $\mu\text{M}$ ), **20** (6  $\mu\text{M}$ ), **32** (20.4  $\mu\text{M}$ ), **39** (5.3  $\mu\text{M}$ ), **40** (6.3  $\mu\text{M}$ ), **41** (5.2  $\mu\text{M}$ ), **42** (3  $\mu\text{M}$ ). Intracellular production of ROS was measured using dual H<sub>2</sub>DCFDA/PI staining. The intensity of DCF fluorescence corresponds to intracellular ROS level in HepG2 cells. The flow cytometric analysis indicated DCF fluorescence shift, which is correlated with higher ROS production after 24 h incubation with the tested compounds compared to control.

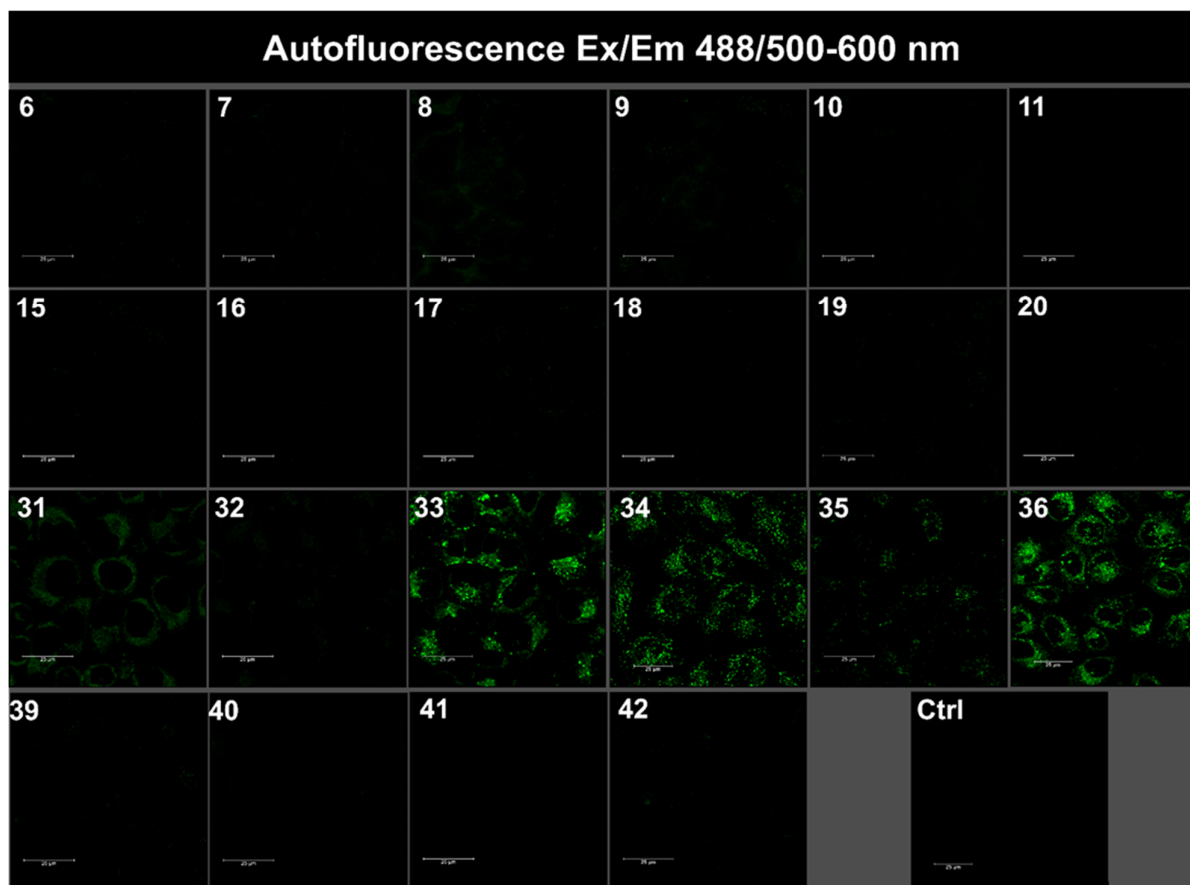

**Figure S161.** Autofluorescence analysis of the tested compounds in HepG2 cells. Confocal microscopy analysis was performed 8 h after treatment with the compounds in the final concentration corresponding to  $IC_{50}$ . The number of each compound is placed in the left corner of the picture. The intensity of the autofluorescence was analyzed at Ex/Em 488/500-600 nm.

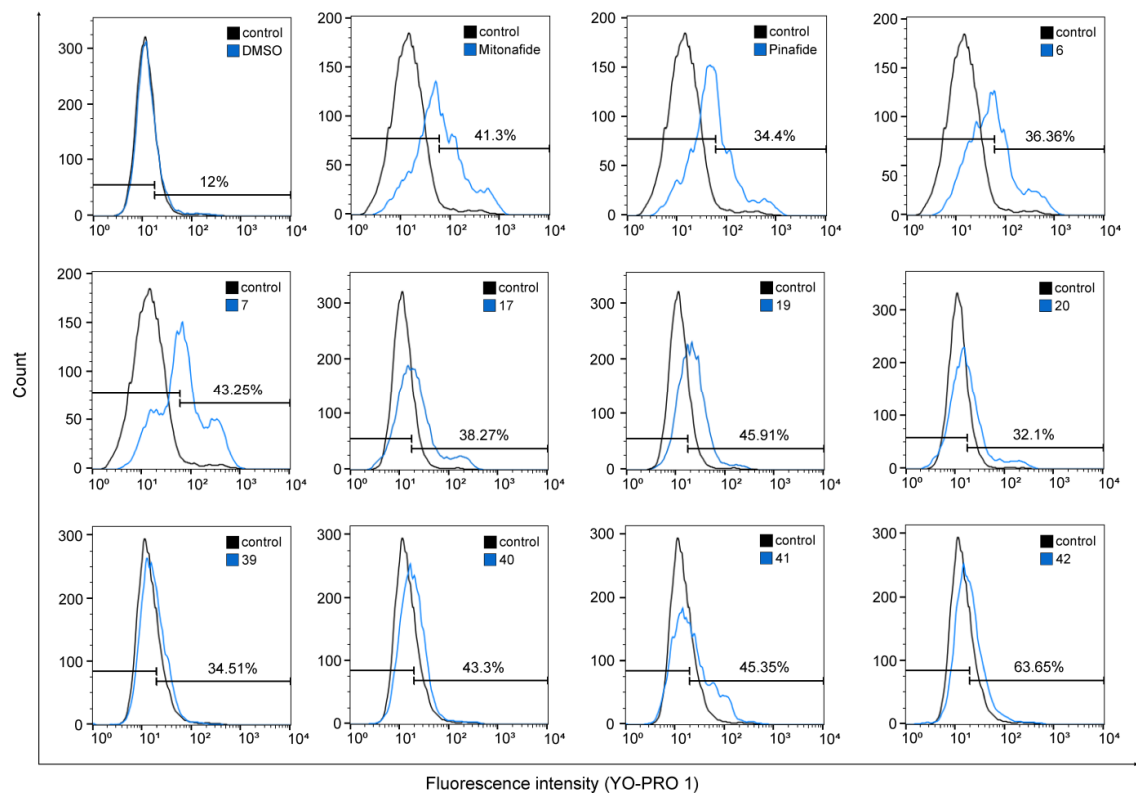

**Figure S162.** Flow cytometry analysis of apoptosis/necrosis in HepG2 cells after cell toxicity induction with compound 6 (115  $\mu$ M), 7 (104  $\mu$ M), 8 (4  $\mu$ M), 9 (3  $\mu$ M), 10 (8  $\mu$ M), 11 (5  $\mu$ M), 15 (68  $\mu$ M), 16 (61  $\mu$ M), 17 (10  $\mu$ M), 18 (15  $\mu$ M), 19 (14  $\mu$ M), 20 (12  $\mu$ M), 31 (53  $\mu$ M), 32 (42  $\mu$ M), 33 (5  $\mu$ M), 34 (8  $\mu$ M), 35 (9  $\mu$ M), 36 (6  $\mu$ M), 39 (11  $\mu$ M), 40 (13  $\mu$ M), 41 (10  $\mu$ M), 42 (6  $\mu$ M). The chosen concentration of each compound corresponded to whole IC<sub>50</sub> values. The number of apoptotic cells for each compound is indicated on histogram. Level of apoptosis was evaluated with dual staining with YO-PRO-1/PI.



**Table 1S.** Percentage distribution of early and late apoptotic and necrotic cells assessed by flow cytometry.

| compound   | live cells [%] | early apoptosis [%] | late apoptosis [%] | necrosis [%] |
|------------|----------------|---------------------|--------------------|--------------|
| <b>6</b>   | 47.75 ± 4.78   | 1.56 ± 0.26         | 28.80 ± 3.72       | 21.85 ± 1.12 |
| <b>7</b>   | 25.90 ± 0.34   | 4.55 ± 0.67         | 38.70 ± 1.72       | 30.85 ± 2.14 |
| <b>17</b>  | 60.75 ± 4.49   | 30.70 ± 4.76        | 7.57 ± 0.98        | 0.98 ± 0.33  |
| <b>19</b>  | 53.40 ± 3.59   | 39.25 ± 6.30        | 6.66 ± 2.55        | 0.72 ± 0.35  |
| <b>20</b>  | 66.70 ± 2.86   | 18.75 ± 2.5         | 13.35 ± 2.69       | 1.23 ± 0.41  |
| <b>39</b>  | 65.40 ± 0.88   | 31.65 ± 1.52        | 2.86 ± 1.05        | 0.08 ± 0.02  |
| <b>40</b>  | 57.40 ± 1.9    | 32.35 ± 2.49        | 9.95 ± 2.17        | 0.35 ± 0.21  |
| <b>41</b>  | 54.35 ± 3.82   | 26.75 ± 2.17        | 18.60 ± 3.01       | 0.34 ± 0.07  |
| <b>42</b>  | 36.10 ± 3.8    | 24.65 ± 1.78        | 39.00 ± 5.33       | 0.24 ± 0.04  |
| Mitonafide | 37.25 ± 1.09   | 1.90 ± 0.19         | 39.40 ± 1.94       | 21.40 ± 3.13 |
| Pinafide   | 47.10 ± 1.01   | 1.40 ± 0.57         | 33.00 ± 1.19       | 18.50 ± 1.72 |

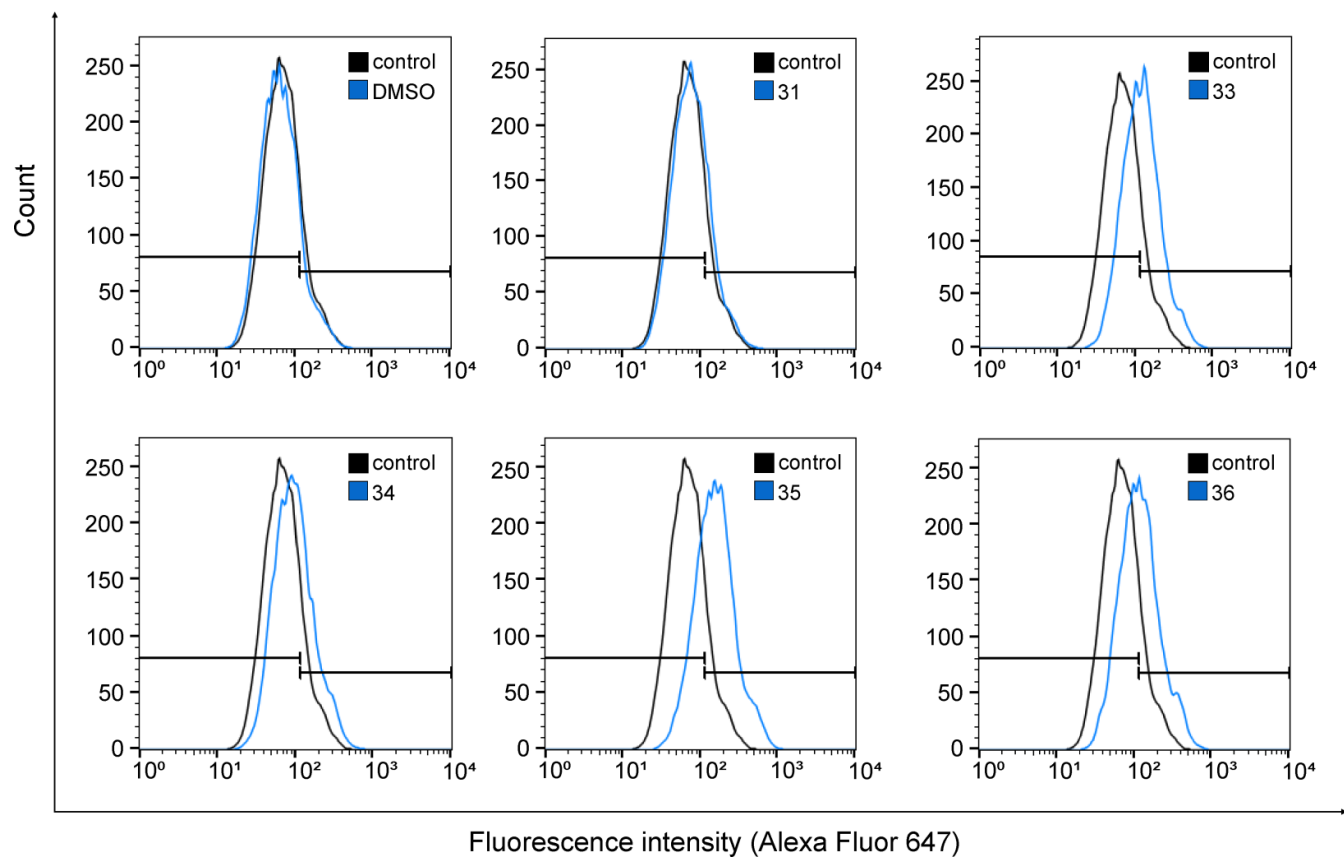

**Figure S163.** Flow cytometry analysis of apoptosis/necrosis in HepG2 cells after cell toxicity induction with compound **31** (53  $\mu\text{M}$ ), **33** (5  $\mu\text{M}$ ), **34** (8  $\mu\text{M}$ ), **35** (9  $\mu\text{M}$ ), **36** (6  $\mu\text{M}$ ). The chosen concentration of each compound corresponded to whole  $\text{IC}_{50}$  values. The number of apoptotic cells for each compound is indicated on histogram. Level of apoptosis was evaluated with Annexin V Alexa Fluor 647 conjugate.

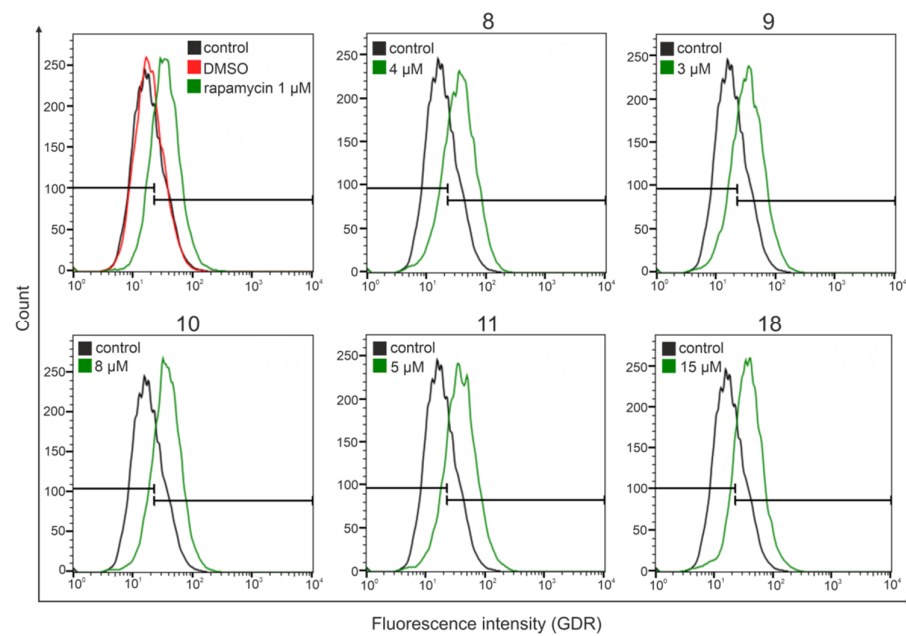

**Figure S164.** Flow cytometry analysis of autophagy in HepG2 cells after cell toxicity induction with compound **8** (4  $\mu\text{M}$ ), **9** (3  $\mu\text{M}$ ), **10** (8  $\mu\text{M}$ ), **11** (5  $\mu\text{M}$ ), **18** (15  $\mu\text{M}$ ). The chosen concentration of each compound corresponded to whole  $\text{IC}_{50}$  values. Level of autophagy was evaluated with Green Detection Reagent. Rapamycin was used as positive control. One representative experiment of three is shown.

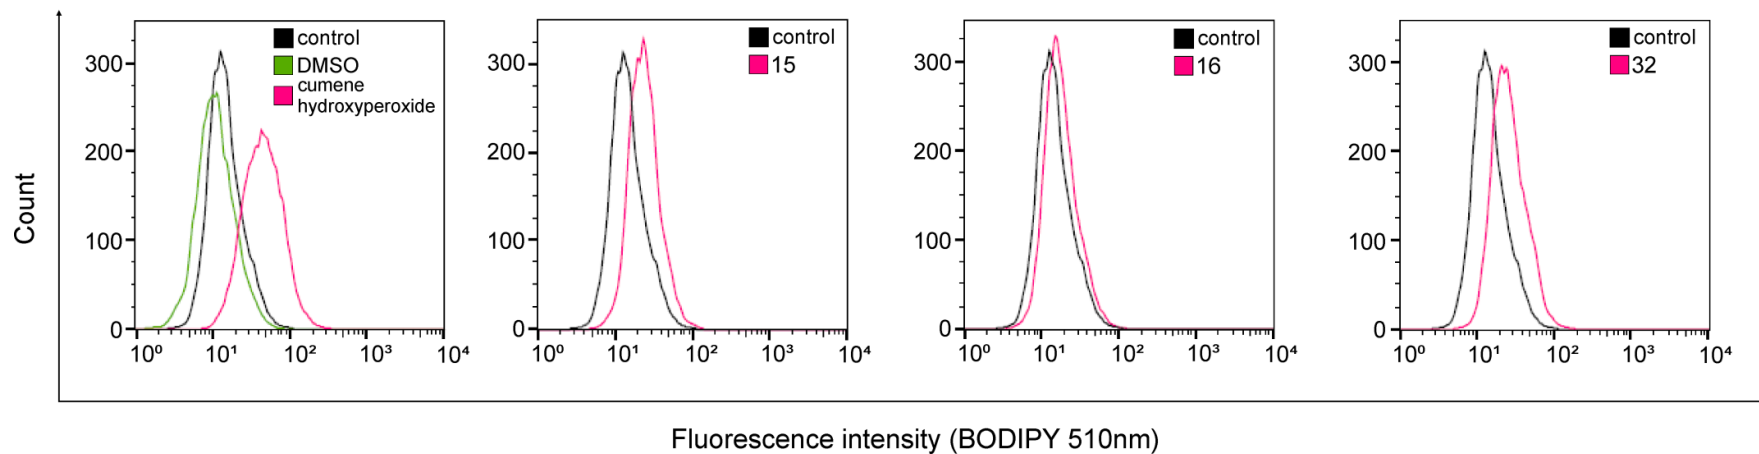

**Figure S165.** Flow cytometry analysis of lipid peroxidation in HepG2 cells after cell toxicity induction with compound **15** (68  $\mu\text{M}$ ), **16** (61  $\mu\text{M}$ ), **32** (42  $\mu\text{M}$ ). The chosen concentration of each compound corresponded to whole  $\text{IC}_{50}$  values. Level of lipid peroxidation was evaluated with 581/591 C11 reagent. To induce strong positive signal the cells were incubated with cumene peroxide. One representative experiment of three is shown.

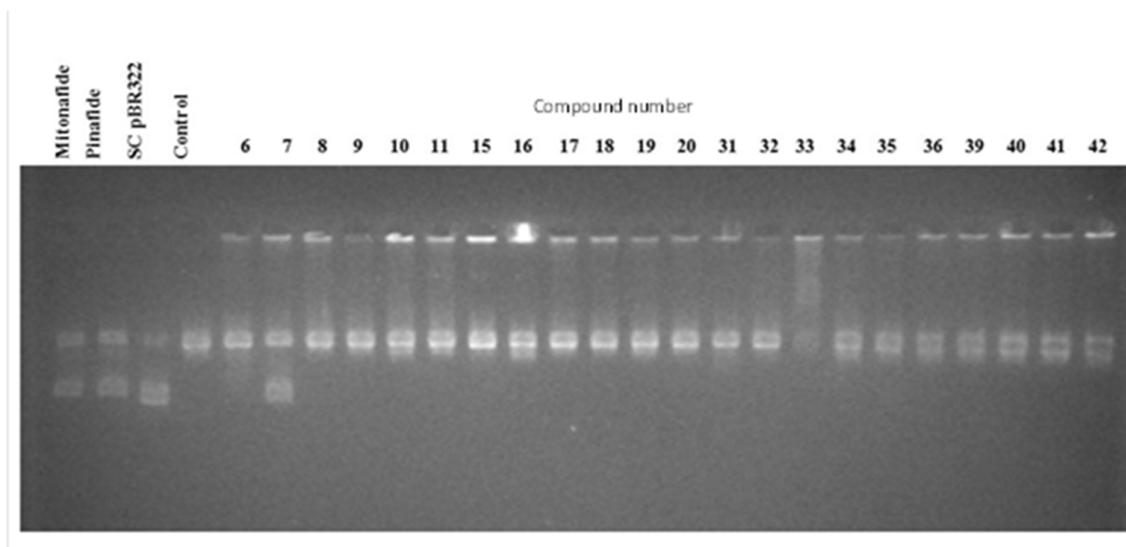

**Figure S166.** Human Topoisomerase II $\alpha$  relaxation assay in the presence of modified with carborane cluster naphthalic anhydrides (6, 7, 15, 16, 31, 32), naphthalimides (8-11, 17-20, 33-36, 39-42), and the control drugs mitonafide and pinafide at a concentration of 100  $\mu$ M.

SC – supercoiled DNA.

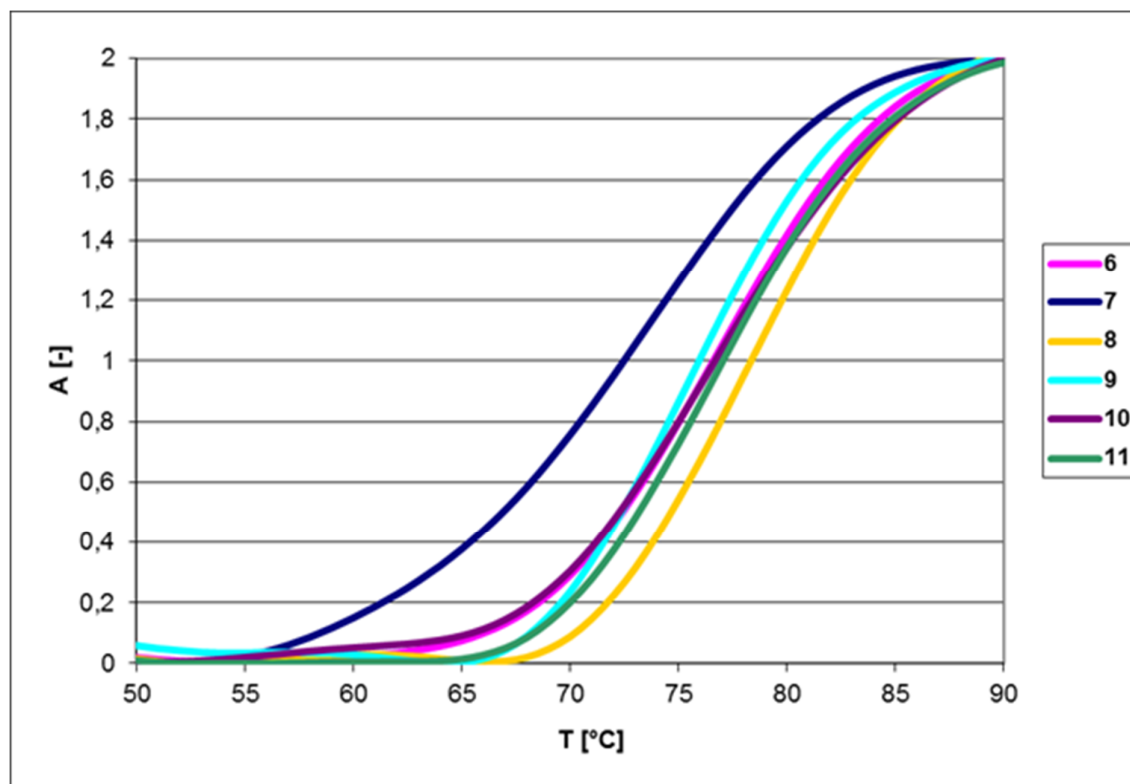

**Figure S167.** Melting curves of ct-DNA upon addition of **6-11** ( $c(\text{ct-DNA}) = 2 \times 10^{-5} \text{ mol dm}^{-3}$ ) at molar ratio  $r = 0.3$  ( $r = [\text{compound}]/[\text{ct-DNA}]$ ), sodium cacodylate buffer (pH 7.0, 20 mM).

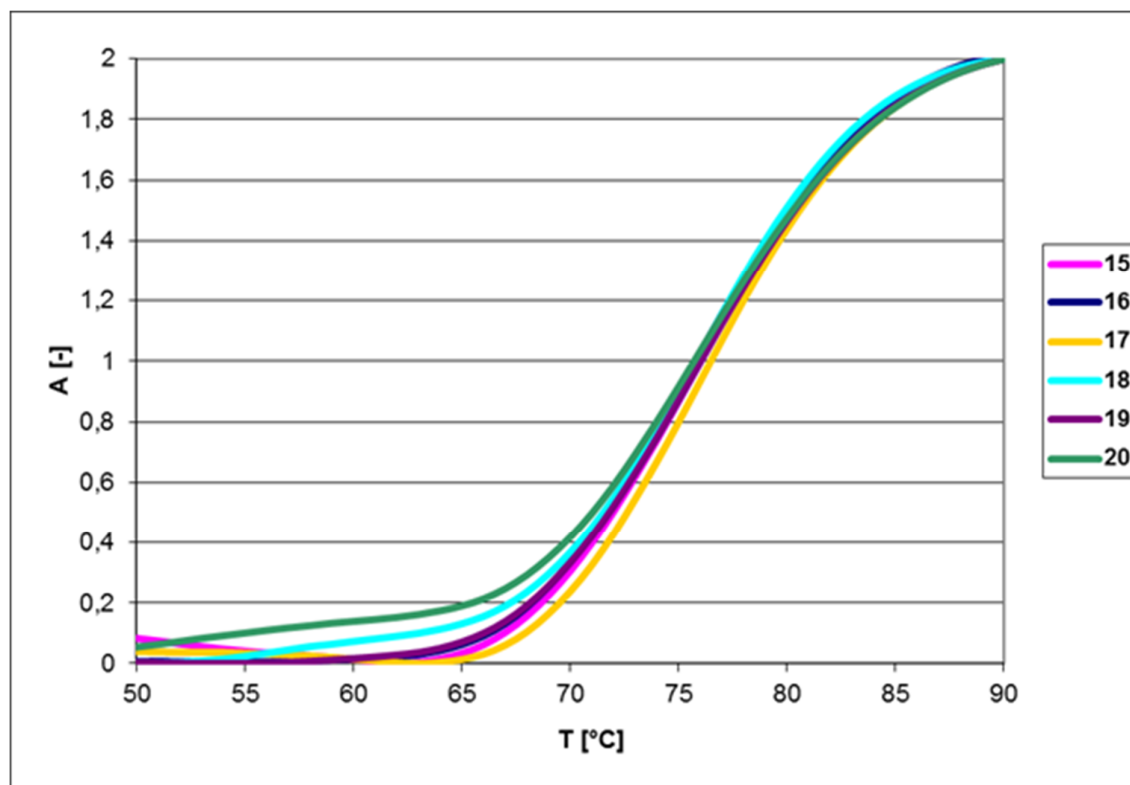

**Figure S168.** Melting curves of ct-DNA upon addition of **15-20** ( $c(\text{ct-DNA}) = 2 \times 10^{-5} \text{ mol dm}^{-3}$ ) at molar ratio  $r = 0.3$  ( $r = [\text{compound}]/[\text{ct-DNA}]$ ), sodium cacodylate buffer (pH 7.0, 20 mM).

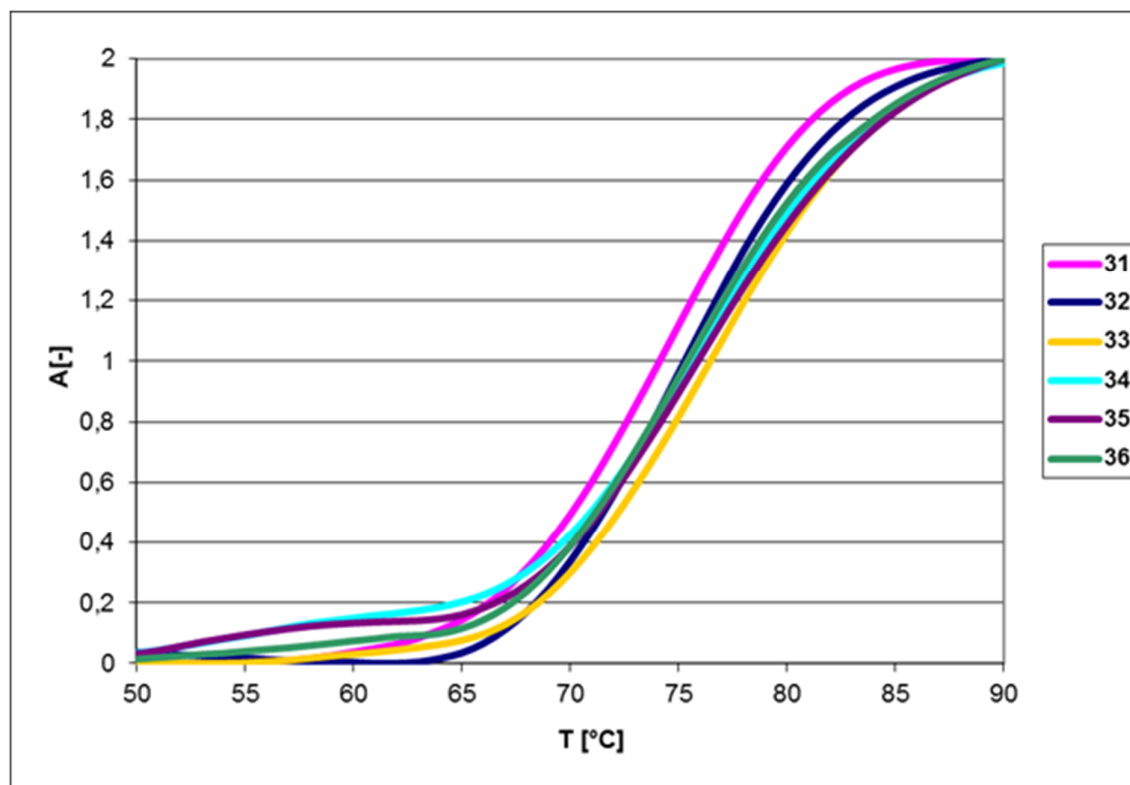

**Figure S169.** Melting curves of ct-DNA upon addition of **31-36** ( $c(\text{ct-DNA}) = 2 \times 10^{-5} \text{ mol dm}^{-3}$ ) at molar ratio  $r = 0.3$  ( $r = [\text{compound}]/[\text{ct-DNA}]$ ), sodium cacodylate buffer (pH 7.0, 20 mM).



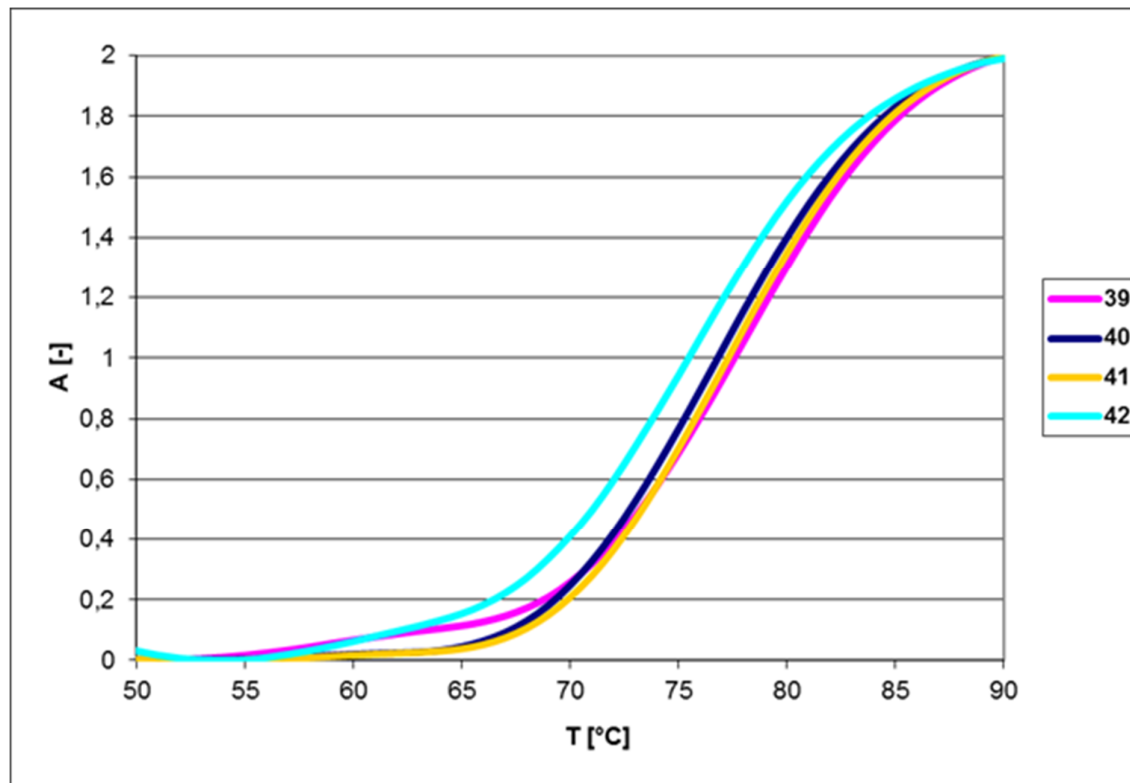

**Figure S170.** Melting curves of ct-DNA upon addition of **39-42** ( $c(\text{ct-DNA}) = 2 \times 10^{-5} \text{ mol dm}^{-3}$ ) at molar ratio  $r = 0.3$  ( $r = [\text{compound}]/[\text{ct-DNA}]$ ), sodium cacodylate buffer (pH 7.0, 20 mM).

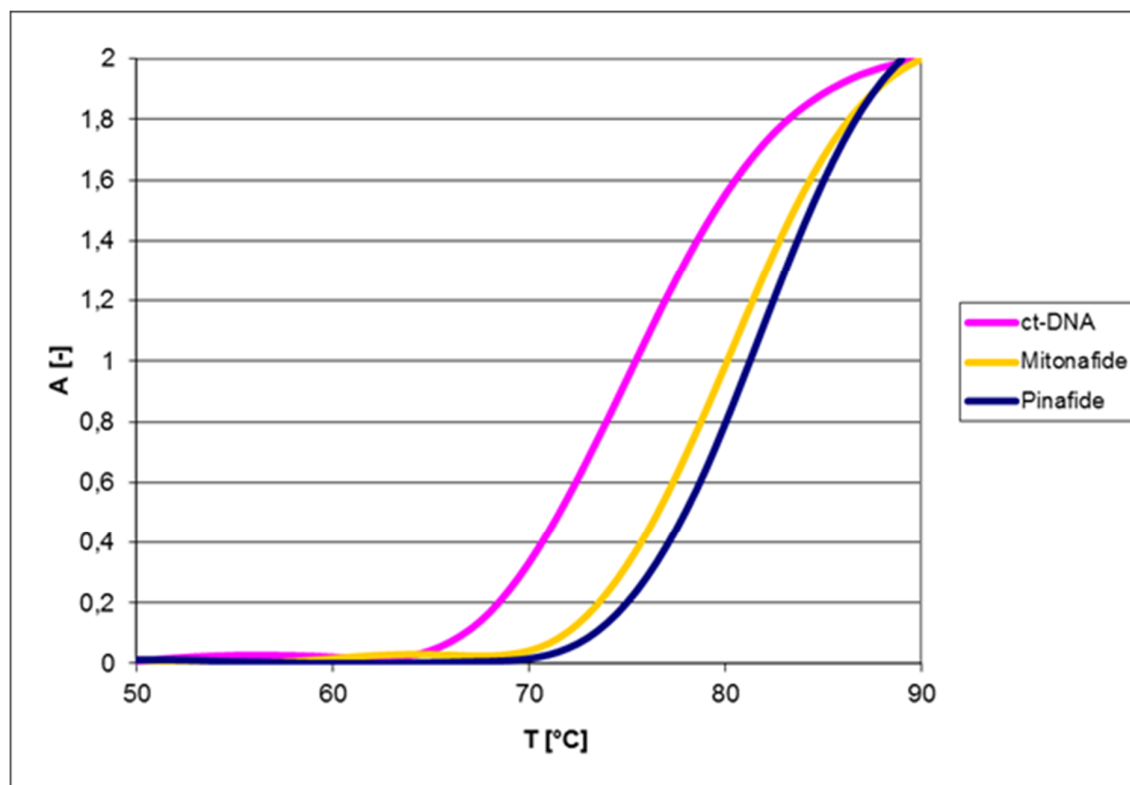

**Figure S171.** Melting curves of ct-DNA upon addition of mitonafide and pinafide ( $c(\text{ct-DNA}) = 2 \times 10^{-5} \text{ mol dm}^{-3}$ ) at molar ratio  $r = 0.3$  ( $r = [\text{compound}]/[\text{ct-DNA}]$ ), sodium cacodylate buffer (pH 7.0, 20 mM).

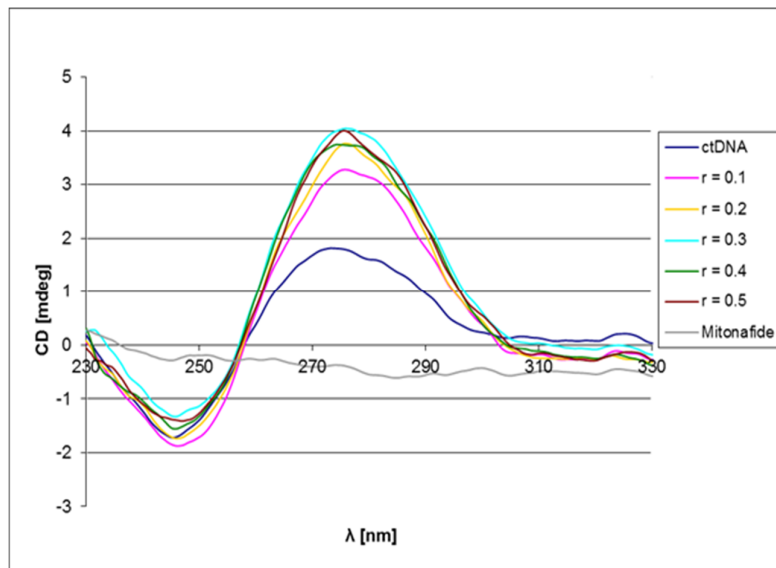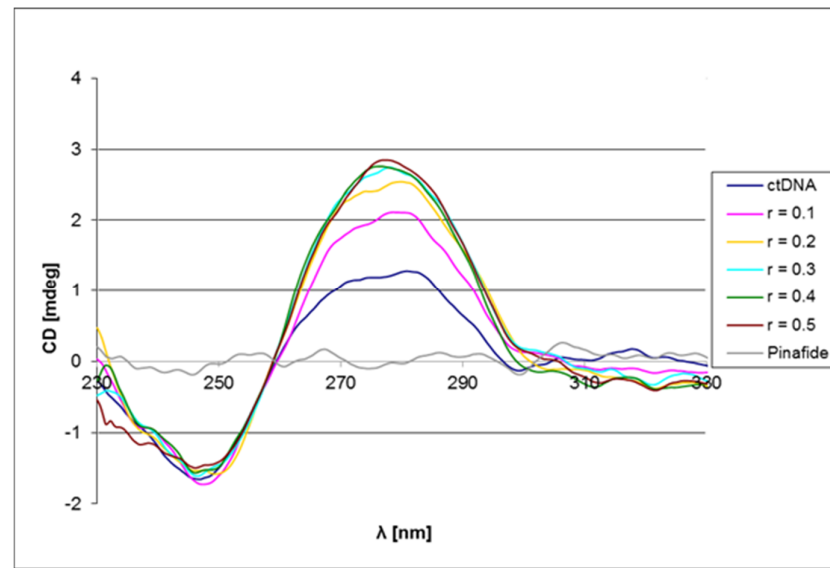

**Figure S172.** Changes in the CD spectrum of ct-DNA upon addition of mitonafide (left) and pinafide (right) ( $c(\text{ct-DNA}) = 4 \times 10^{-5} \text{ mol dm}^{-3}$ ) at different molar ratios  $r = [\text{compound}]/[\text{ct-DNA}]$ , sodium cacodylate buffer (pH 7.0, 20 mM).

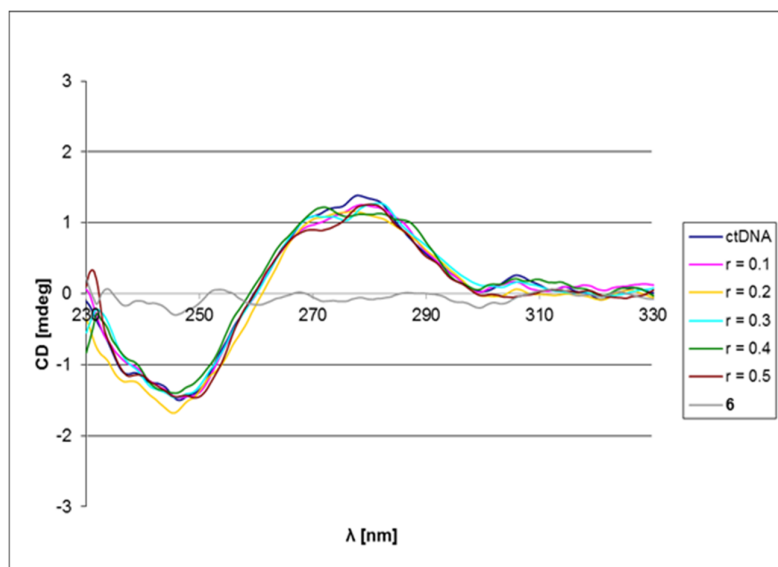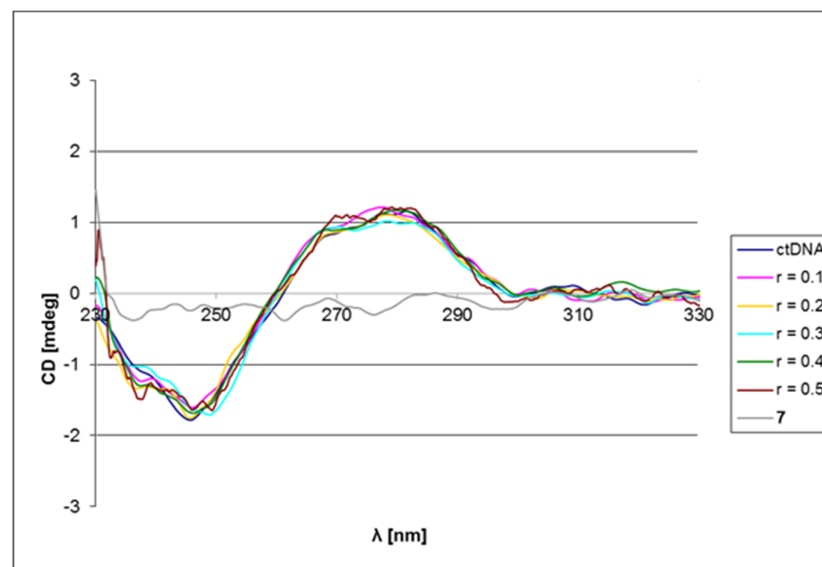

**Figure S173.** Changes in the CD spectrum of ct-DNA upon addition of **6** ( $c(\text{ct-DNA}) = 4 \times 10^{-5} \text{ mol dm}^{-3}$ ) (left) and **7** ( $c(\text{ct-DNA}) = 4 \times 10^{-5} \text{ mol dm}^{-3}$ ) (right) at different molar ratios  $r = [\text{compound}]/[\text{ct-DNA}]$ , sodium cacodylate buffer (pH 7.0, 20 mM).

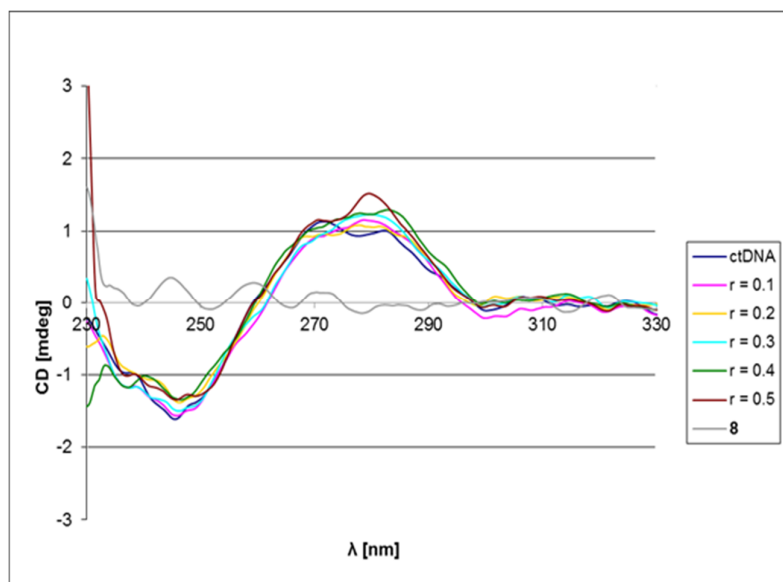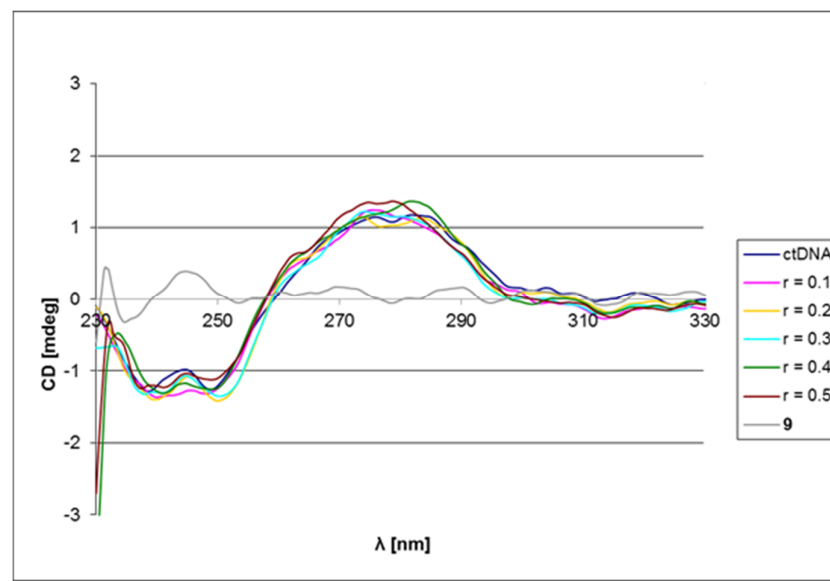

**Figure S174.** Changes in the CD spectrum of ct-DNA upon addition of **8** ( $c(\text{ct-DNA}) = 4 \times 10^{-5} \text{ mol dm}^{-3}$ ) (left) and **9** ( $c(\text{ct-DNA}) = 4 \times 10^{-5} \text{ mol dm}^{-3}$ ) (right) at different molar ratios  $r = [\text{compound}]/[\text{ct-DNA}]$ , sodium cacodylate buffer (pH 7.0, 20 mM).

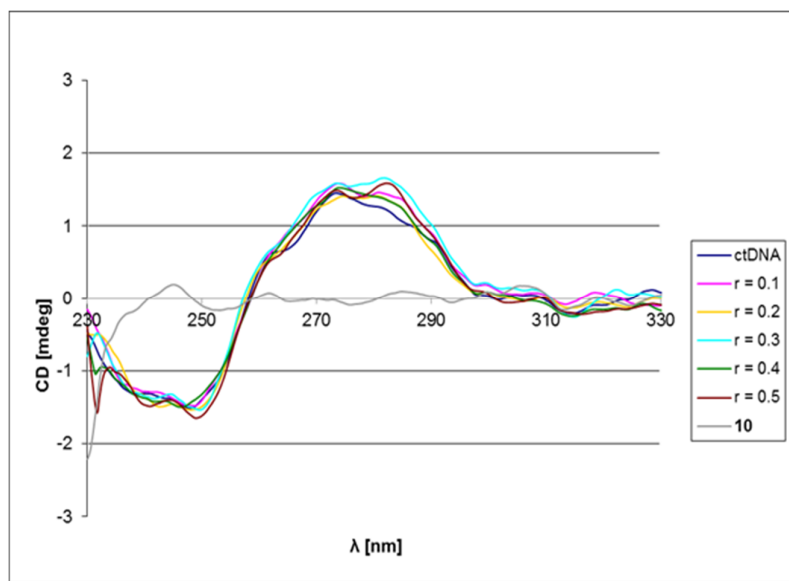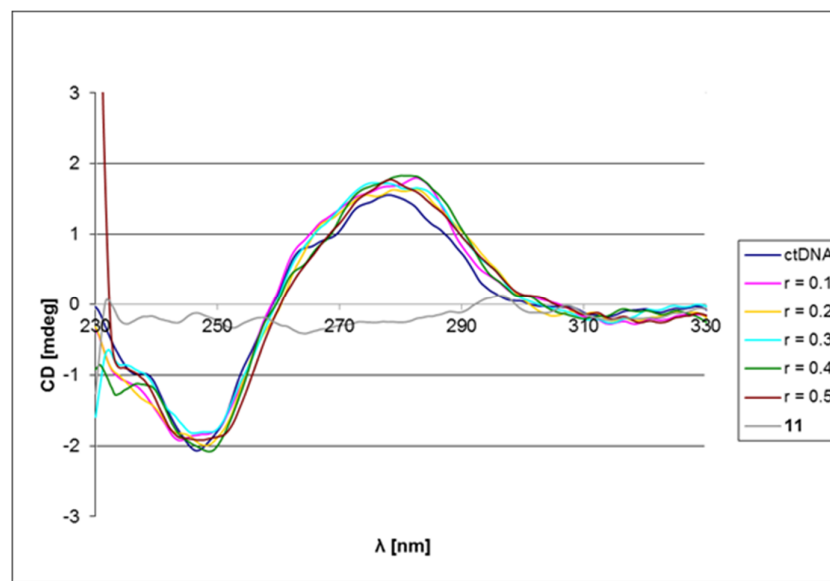

**Figure S175.** Changes in the CD spectrum of ct-DNA upon addition of **10** ( $c(\text{ct-DNA}) = 4 \times 10^{-5} \text{ mol dm}^{-3}$ ) (left) and **11** ( $c(\text{ct-DNA}) = 4 \times 10^{-5} \text{ mol dm}^{-3}$ ) (right) at different molar ratios  $r = [\text{compound}]/[\text{ct-DNA}]$ , sodium cacodylate buffer (pH 7.0, 20 mM).

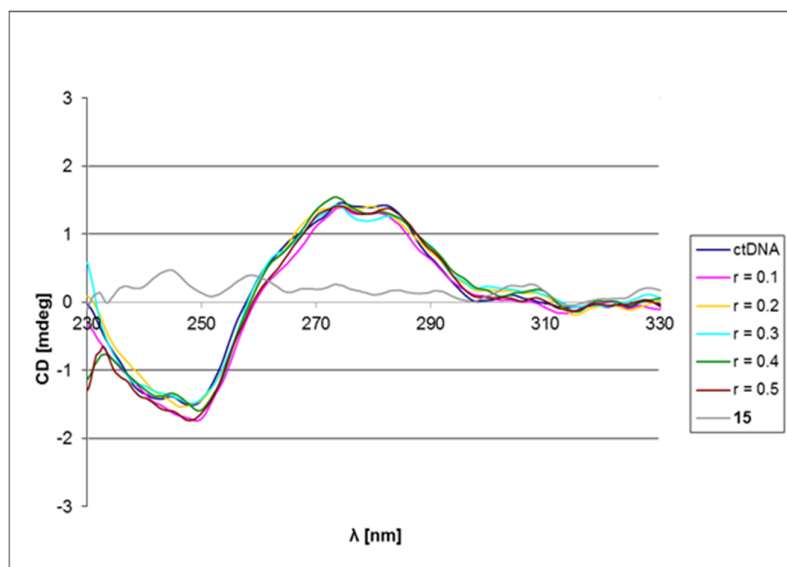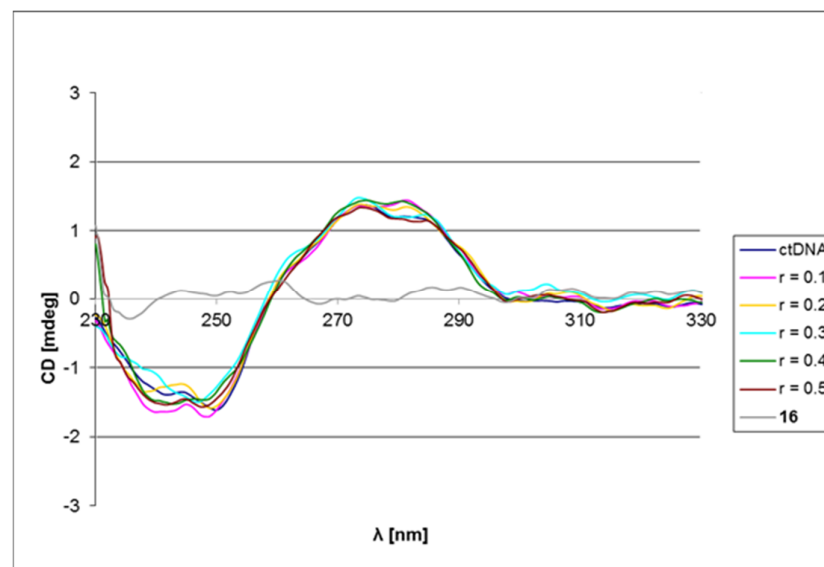

**Figure S176.** Changes in the CD spectrum of ct-DNA upon addition of **15** ( $c(\text{ct-DNA}) = 4 \times 10^{-5} \text{ mol dm}^{-3}$ ) (left) and **16** ( $c(\text{ct-DNA}) = 4 \times 10^{-5} \text{ mol dm}^{-3}$ ) (right) at different molar ratios  $r = [\text{compound}]/[\text{ct-DNA}]$ , sodium cacodylate buffer (pH 7.0, 20 mM).

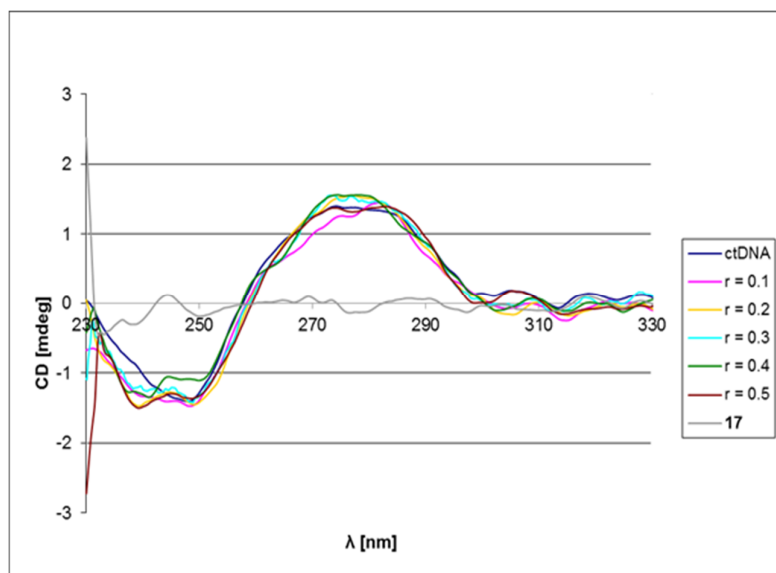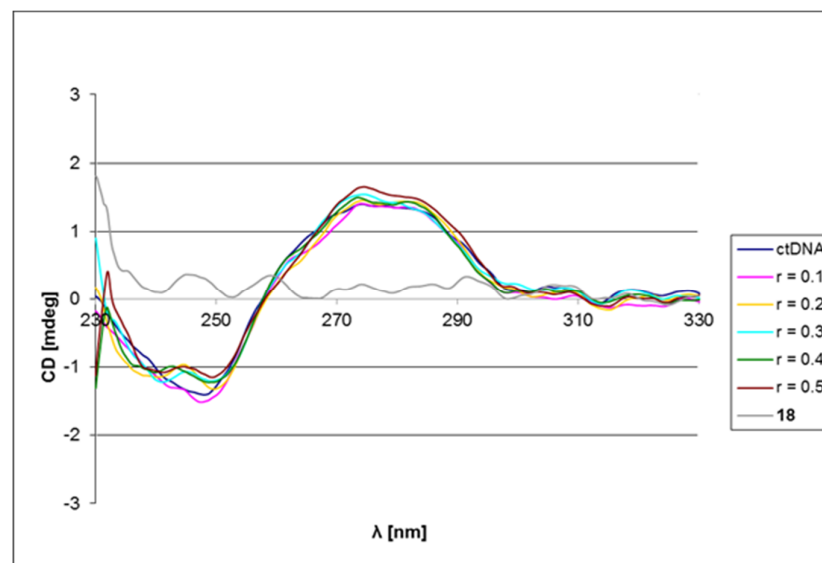

**Figure S177.** Changes in the CD spectrum of ct-DNA upon addition of **17** ( $c(\text{ct-DNA}) = 4 \times 10^{-5} \text{ mol dm}^{-3}$ ) (left) and **18** ( $c(\text{ct-DNA}) = 4 \times 10^{-5} \text{ mol dm}^{-3}$ ) (right) at different molar ratios  $r = [\text{compound}]/[\text{ct-DNA}]$ , sodium cacodylate buffer (pH 7.0, 20 mM).



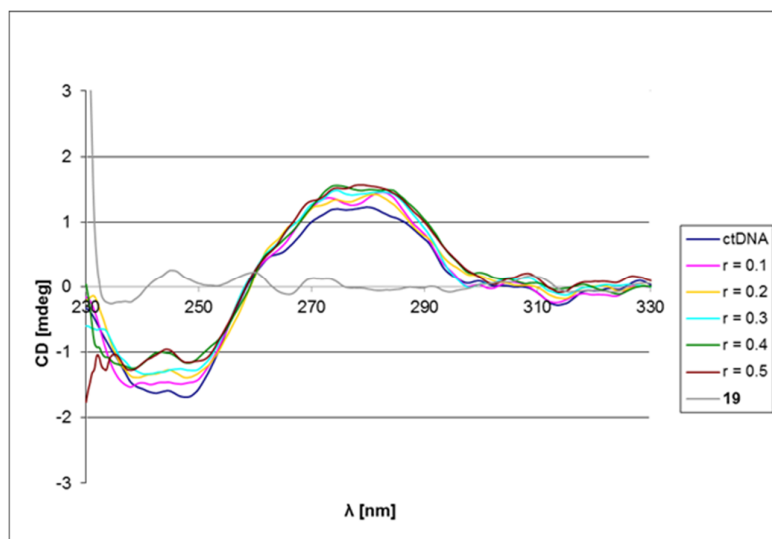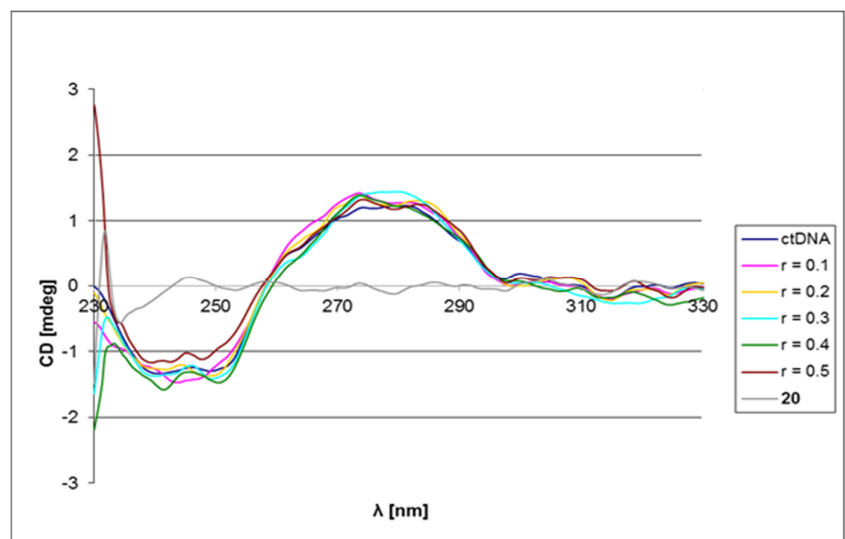

**Figure S178.** Changes in the CD spectrum of ct-DNA upon addition of **19** ( $c(\text{ct-DNA}) = 4 \times 10^{-5} \text{ mol dm}^{-3}$ ) (left) and **20** ( $c(\text{ct-DNA}) = 4 \times 10^{-5} \text{ mol dm}^{-3}$ ) (right) at different molar ratios  $r = [\text{compound}]/[\text{ct-DNA}]$ , sodium cacodylate buffer (pH 7.0, 20 mM).

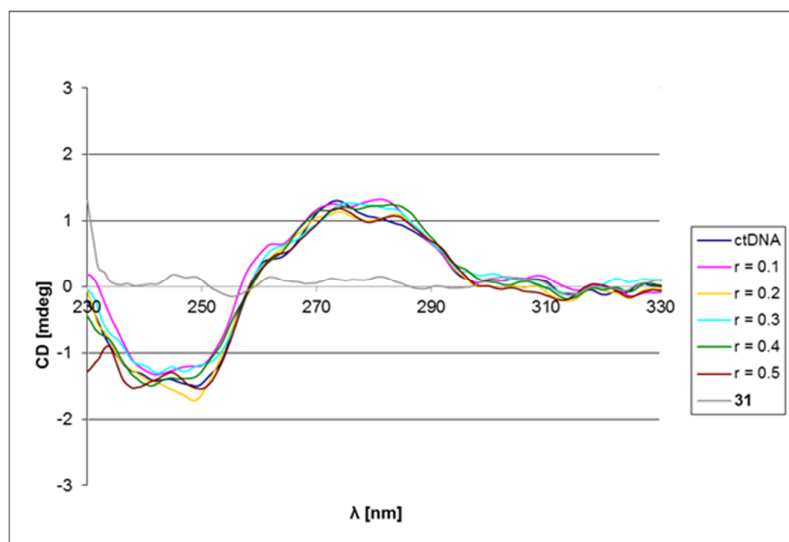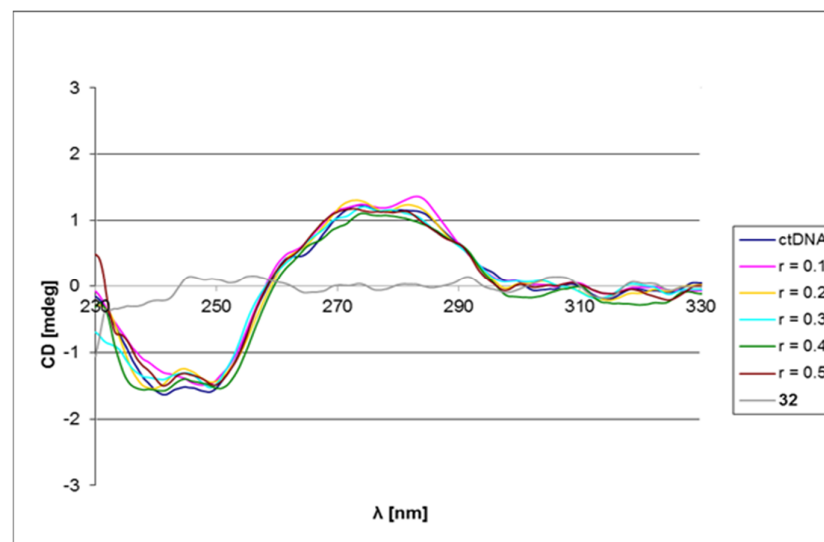

**Figure S179.** Changes in the CD spectrum of ct-DNA upon addition of **31** ( $c(\text{ct-DNA}) = 4 \times 10^{-5} \text{ mol dm}^{-3}$ ) (left) and **32** ( $c(\text{ct-DNA}) = 4 \times 10^{-5} \text{ mol dm}^{-3}$ ) (right) at different molar ratios  $r = [\text{compound}]/[\text{ct-DNA}]$ , sodium cacodylate buffer (pH 7.0, 20 mM).

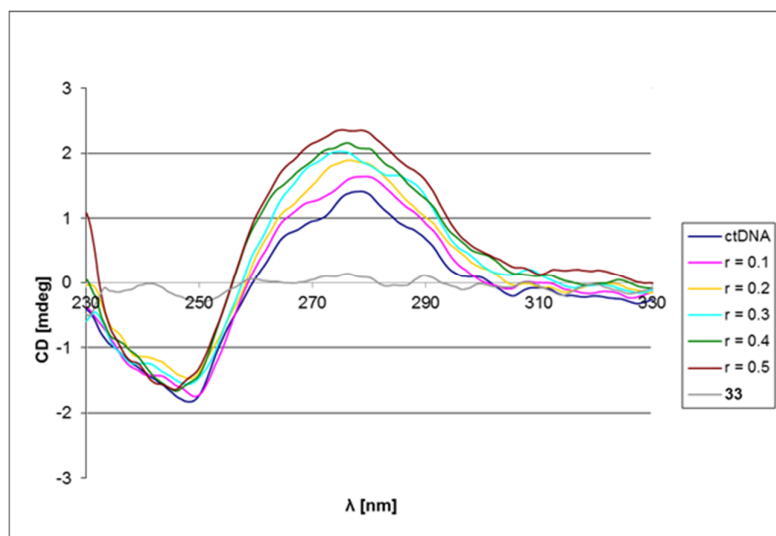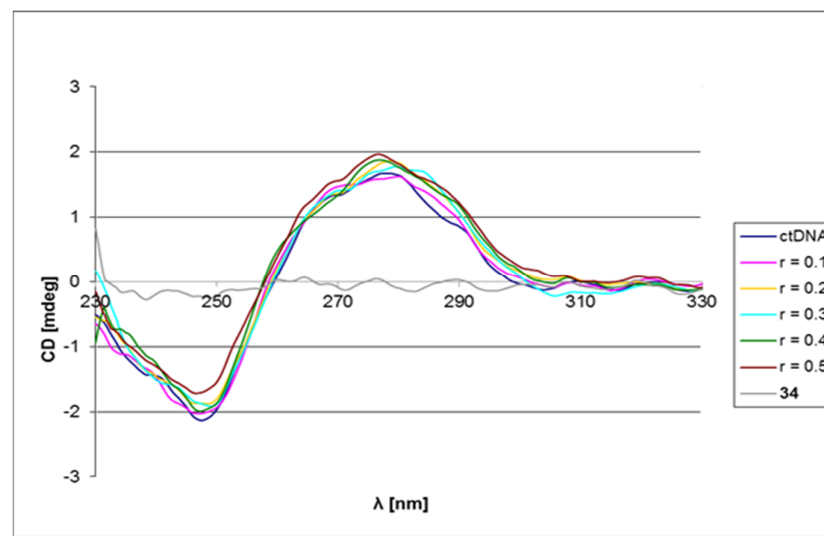

**Figure S180.** Changes in the CD spectrum of ct-DNA upon addition of **33** ( $c(\text{ct-DNA}) = 4 \times 10^{-5} \text{ mol dm}^{-3}$ ) (left) and **34** ( $c(\text{ct-DNA}) = 4 \times 10^{-5} \text{ mol dm}^{-3}$ ) (right) at different molar ratios  $r = [\text{compound}]/[\text{ct-DNA}]$ , sodium cacodylate buffer (pH 7.0, 20 mM).

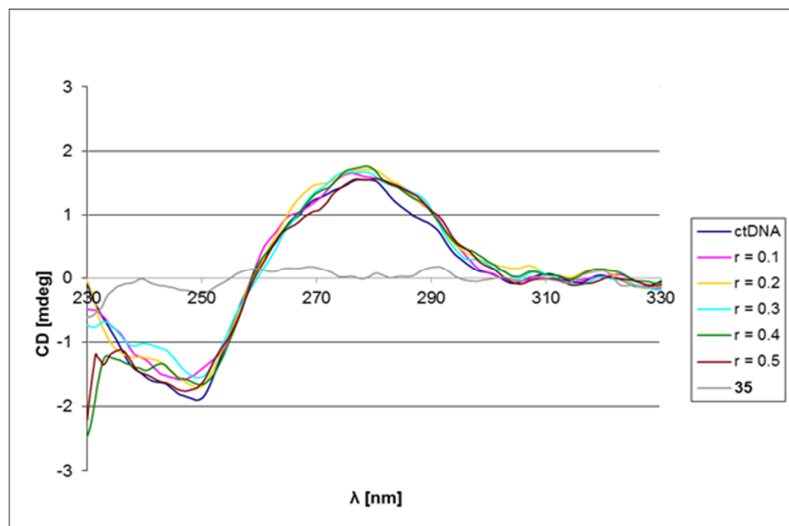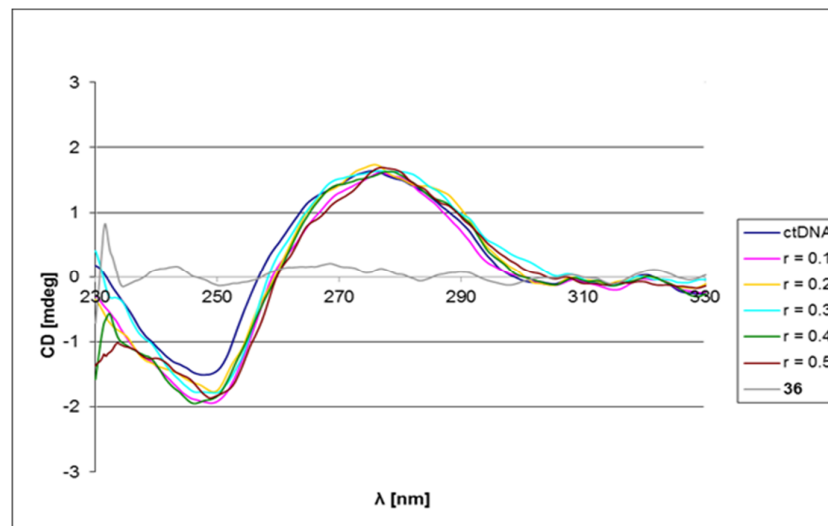

**Figure S181.** Changes in the CD spectrum of ct-DNA upon addition of **35** ( $c(\text{ct-DNA}) = 4 \times 10^{-5} \text{ mol dm}^{-3}$ ) (left) and **36** ( $c(\text{ct-DNA}) = 4 \times 10^{-5} \text{ mol dm}^{-3}$ ) (right) at different molar ratios  $r = [\text{compound}]/[\text{ct-DNA}]$ , sodium cacodylate buffer (pH 7.0, 20 mM).

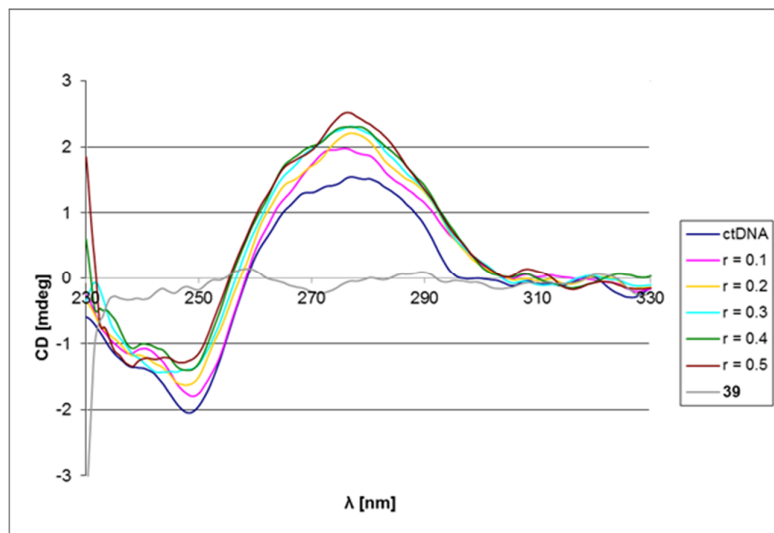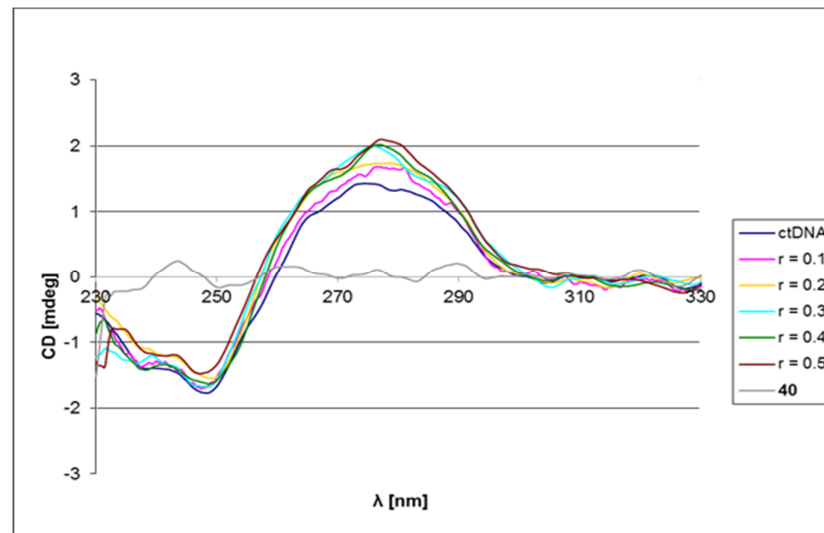

**Figure S182.** Changes in the CD spectrum of ct-DNA upon addition of **39** ( $c(\text{ct-DNA}) = 4 \times 10^{-5} \text{ mol dm}^{-3}$ ) (left) and **40** ( $c(\text{ct-DNA}) = 4 \times 10^{-5} \text{ mol dm}^{-3}$ ) (right) at different molar ratios  $r = [\text{compound}]/[\text{ct-DNA}]$ , sodium cacodylate buffer (pH 7.0, 20 mM).

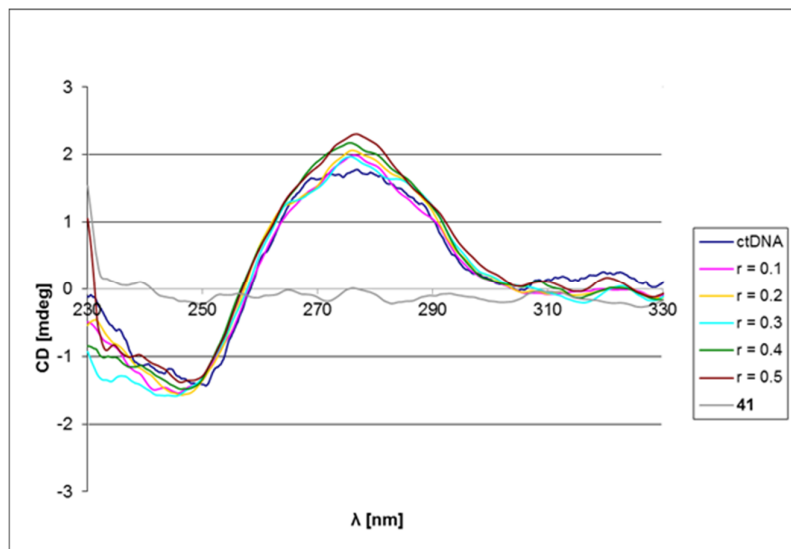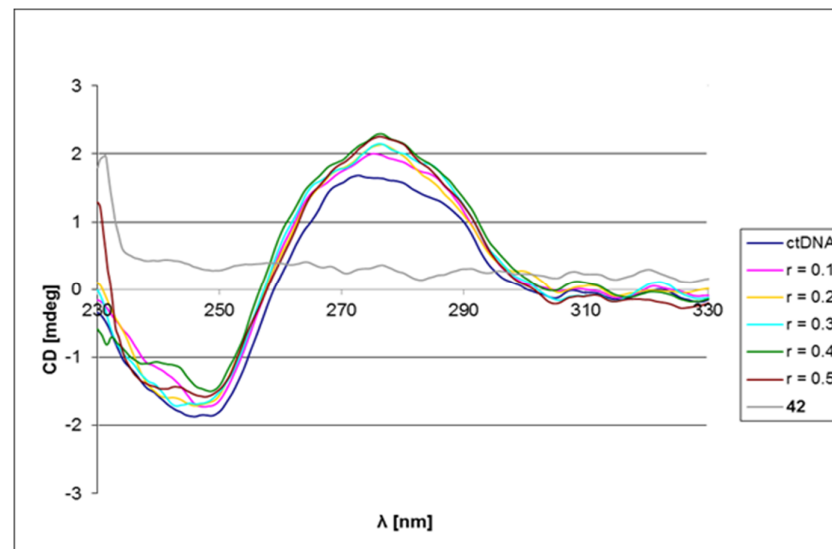

**Figure S183.** Changes in the CD spectrum of ct-DNA upon addition of **41** ( $c(\text{ct-DNA}) = 4 \times 10^{-5} \text{ mol dm}^{-3}$ ) (left) and **42** ( $c(\text{ct-DNA}) = 4 \times 10^{-5} \text{ mol dm}^{-3}$ ) (right) at different molar ratios  $r = [\text{compound}]/[\text{ct-DNA}]$ , sodium cacodylate buffer (pH 7.0, 20 mM).

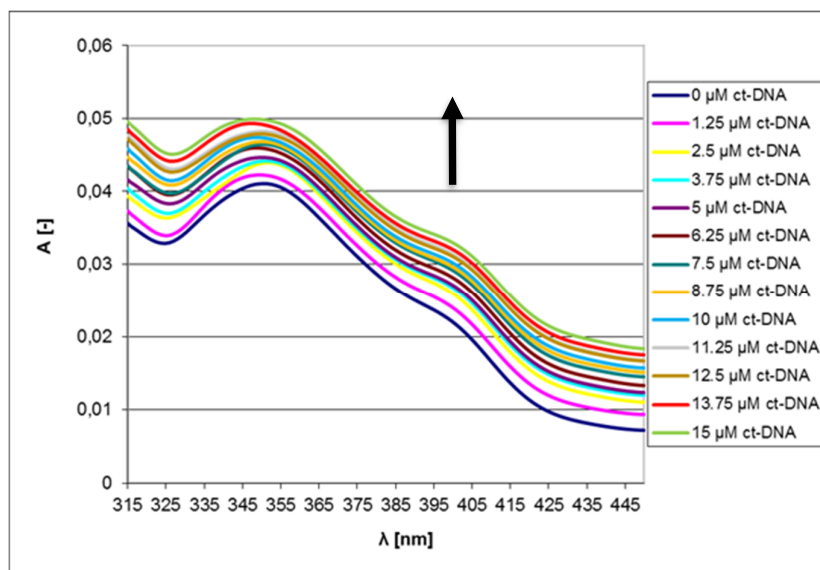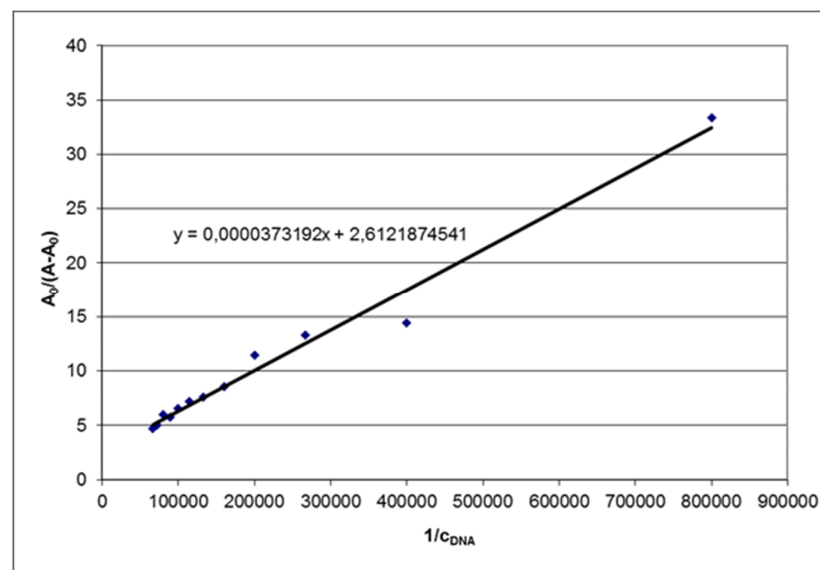

**Figure S184.** UV-vis absorption spectra of compound **6** (20  $\mu\text{M}$ ) in the presence of increasing amount of ct-DNA (0-15  $\mu\text{M}$ ) (left). The plot of  $A_0/(A-A_0)$  versus  $1/[\text{DNA}]$  yielded the binding constant (right).

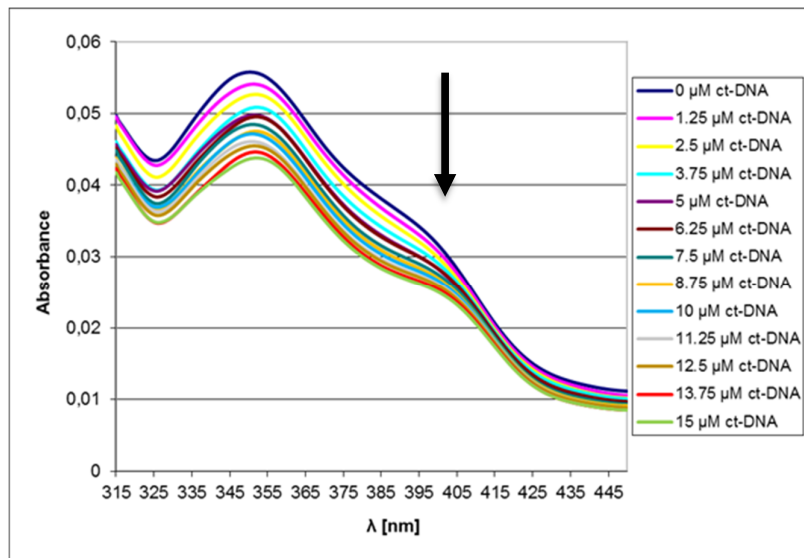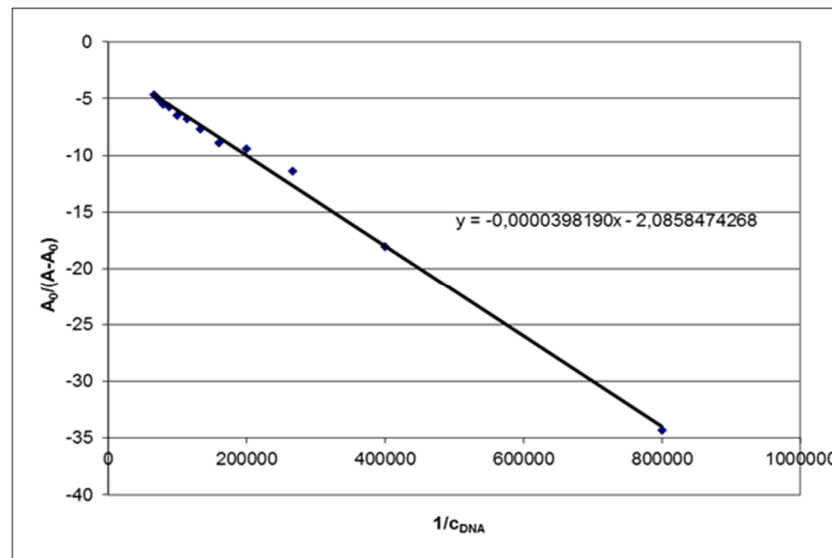

**Figure S185.** UV-vis absorption spectra of compound 7 (20 μM) in the presence of increasing amount of ct-DNA (0-15 μM) (left). The plot of  $A_0/(A-A_0)$  versus  $1/[DNA]$  yielded the binding constant (right).



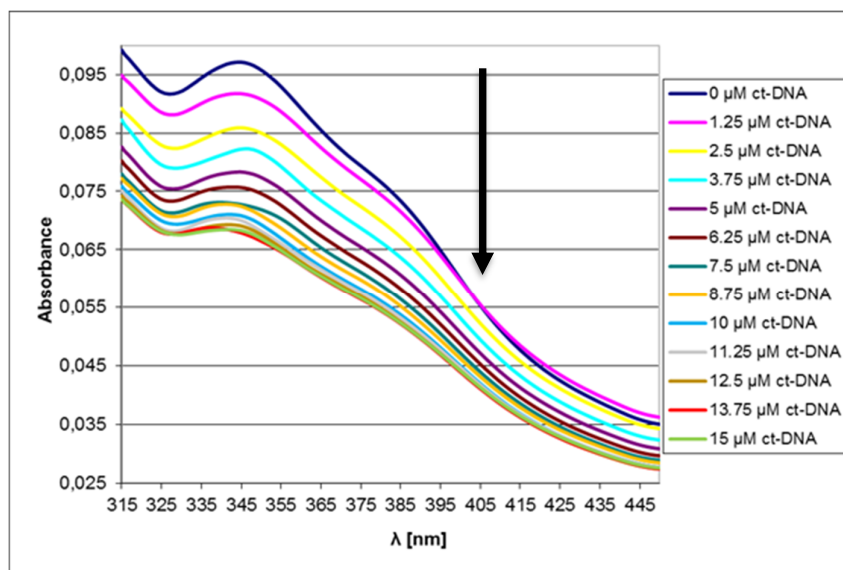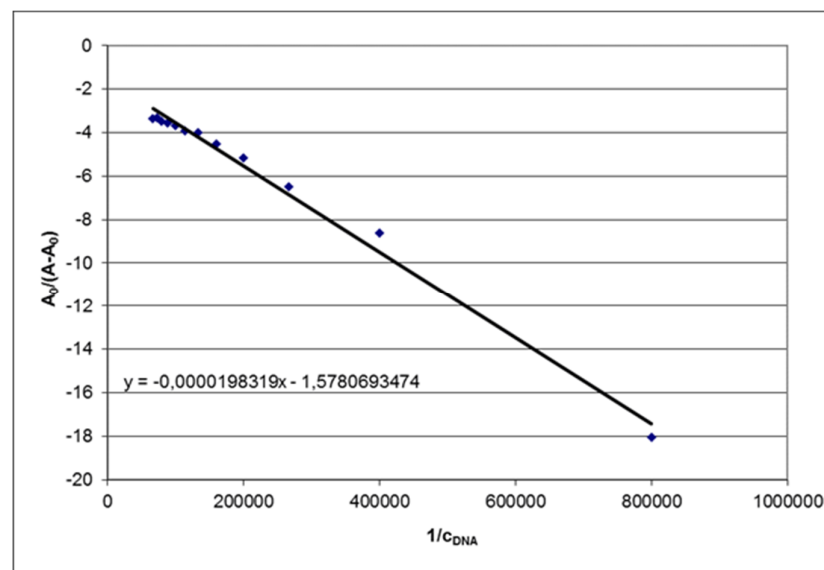

**Figure S186.** UV-vis absorption spectra of compound 8 (20 μM) in the presence of increasing amount of ct-DNA (0-15 μM) (left). The plot of  $A_0/(A-A_0)$  versus  $1/[DNA]$  yielded the binding constant (right).

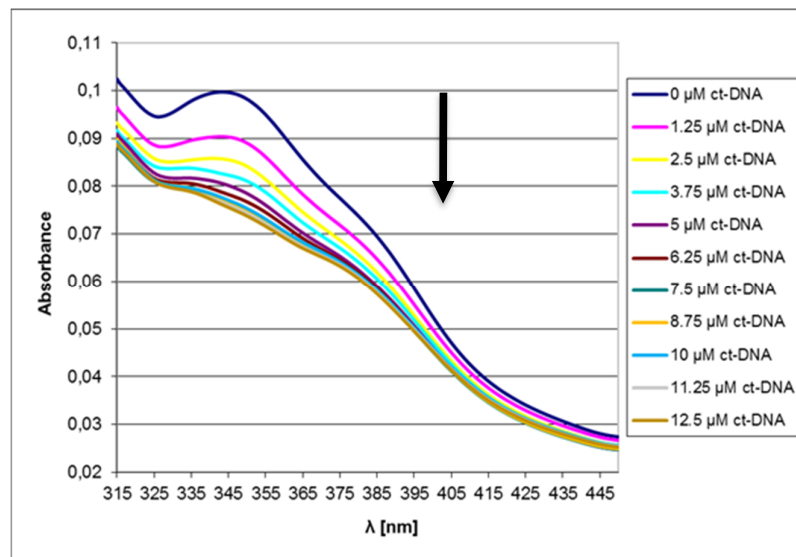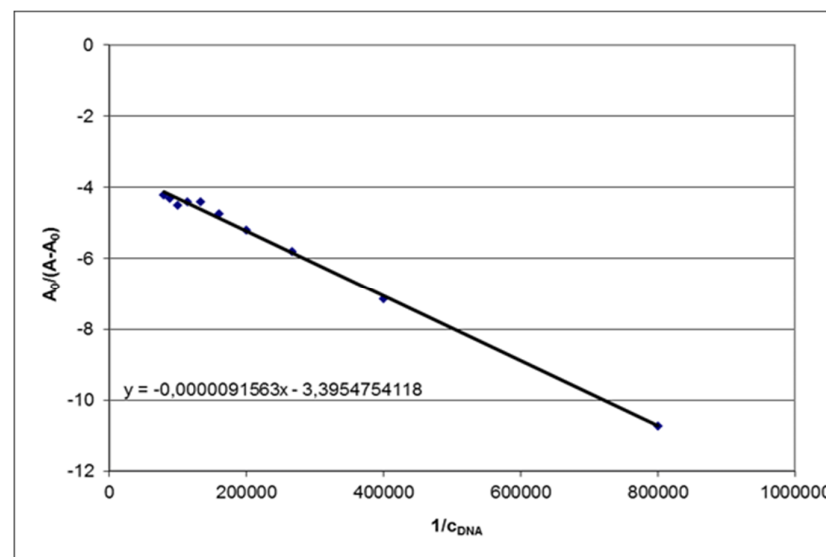

**Figure S187.** UV-vis absorption spectra of compound 9 (20 μM) in the presence of increasing amount of ct-DNA (0-15 μM) (left). The plot of  $A_0/A-A_0$  versus  $1/[DNA]$  yielded the binding constant (right).

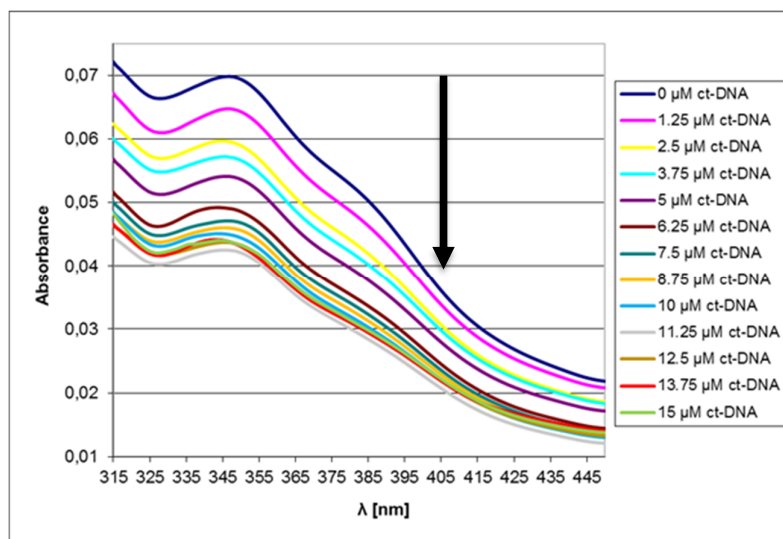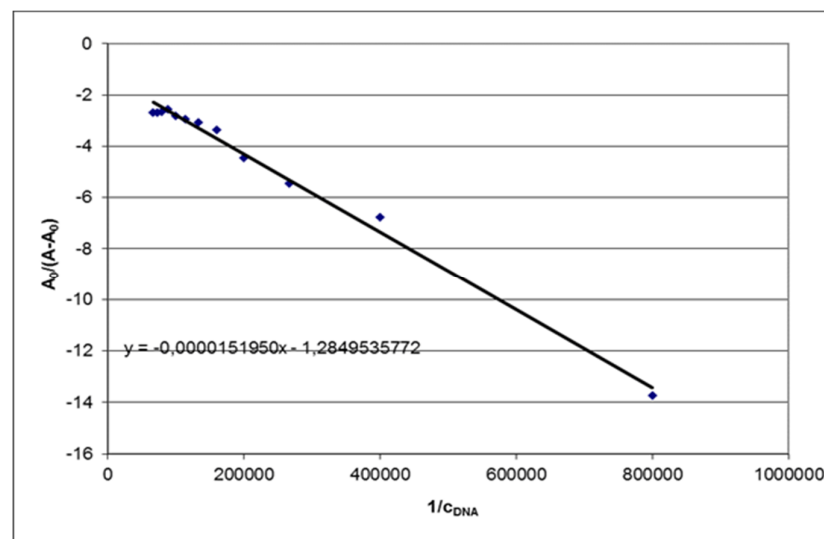

**Figure S188.** UV-vis absorption spectra of compound **10** (20 μM) in the presence of increasing amount of ct-DNA (0-15 μM) (left). The plot of  $A_0/A-A_0$  versus  $1/[DNA]$  yielded the binding constant (right).

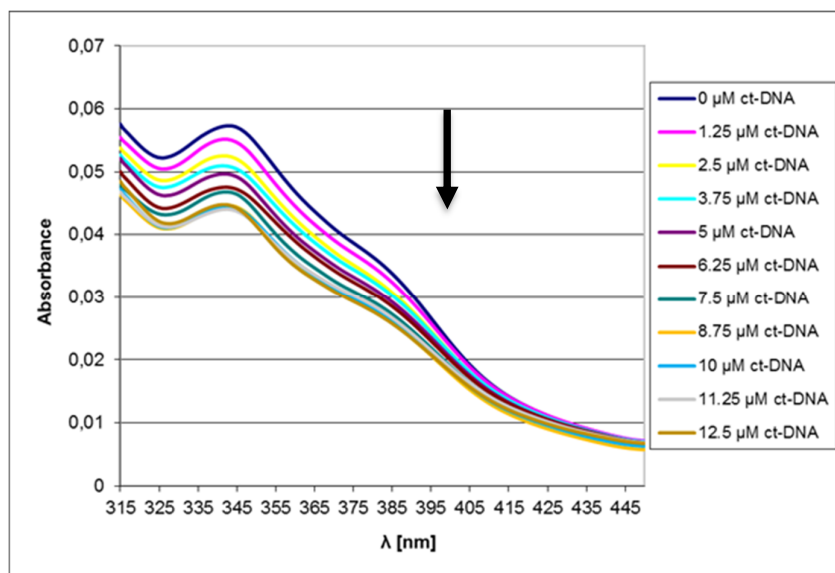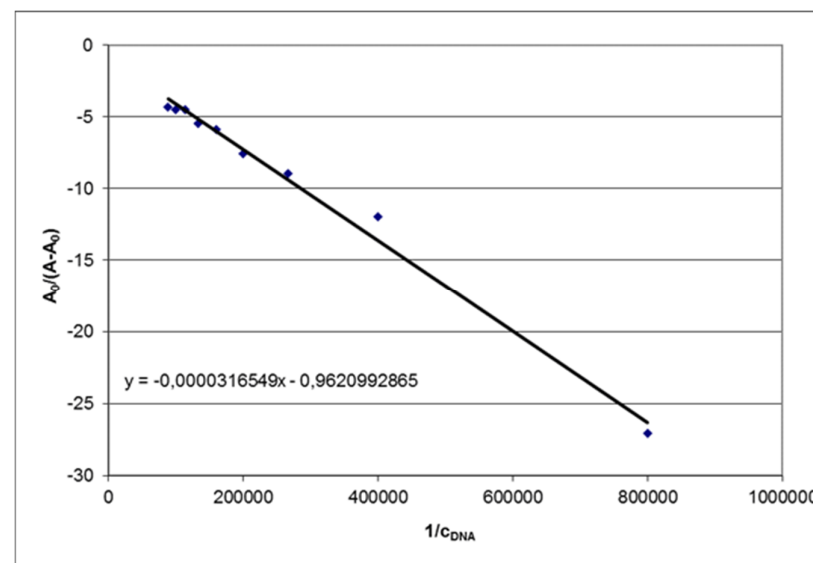

**Figure S189.** UV-vis absorption spectra of compound **11** (20  $\mu\text{M}$ ) in the presence of increasing amount of ct-DNA (0-15  $\mu\text{M}$ ) (left). The plot of  $A_0/(A-A_0)$  versus  $1/[\text{DNA}]$  yielded the binding constant (right).

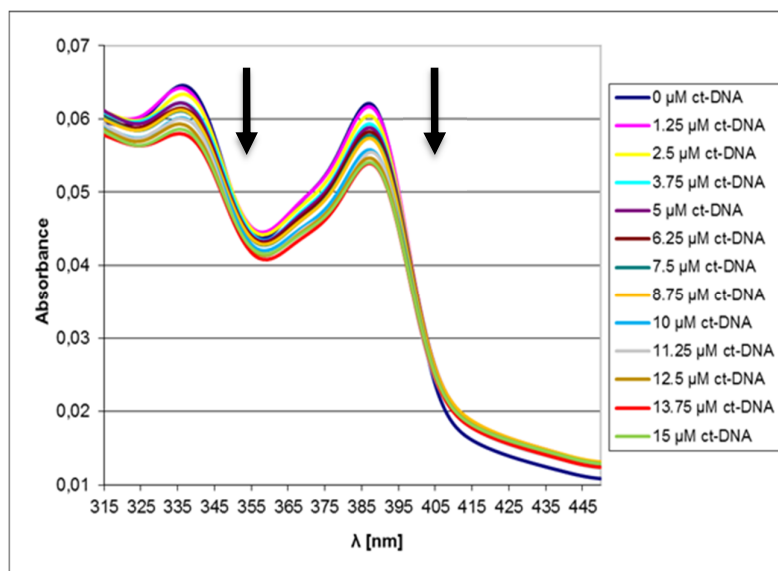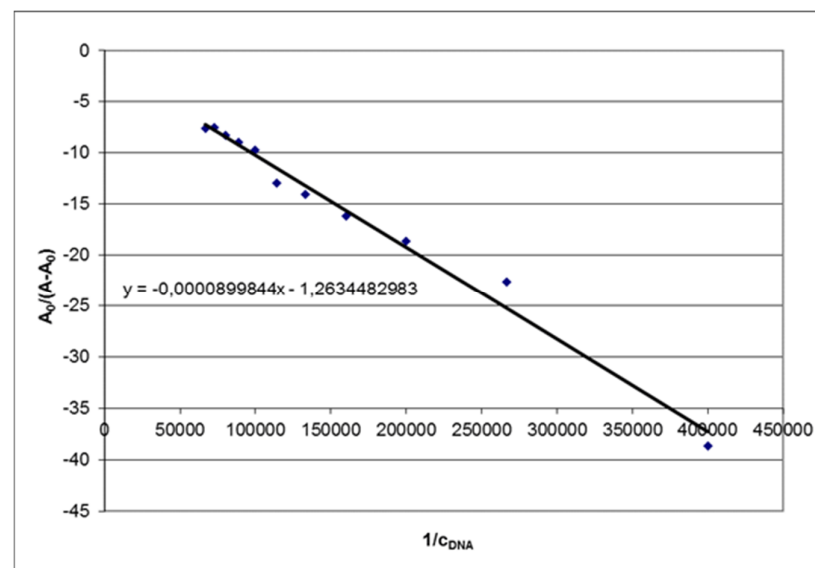

**Figure S190.** UV-vis absorption spectra of compound 15 (20 μM) in the presence of increasing amount of ct-DNA (0-15 μM) (left). The plot of  $A_0/A-A_0$  versus  $1/[DNA]$  yielded the binding constant (right).

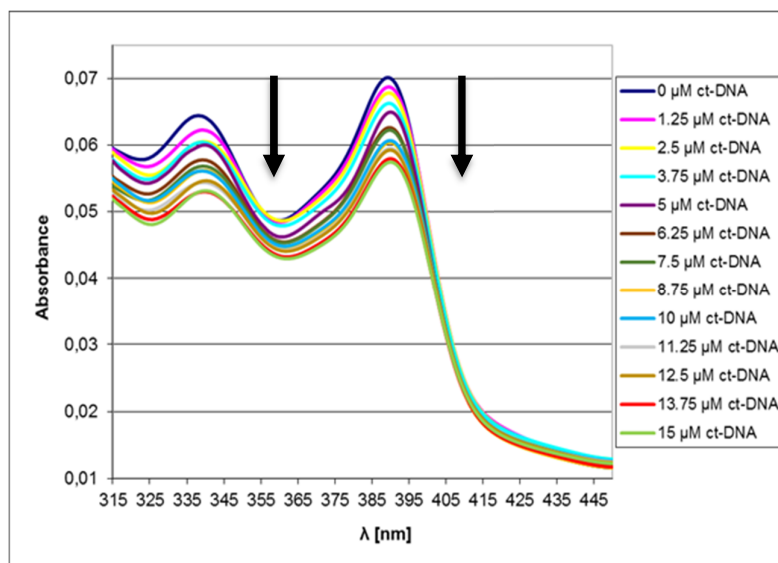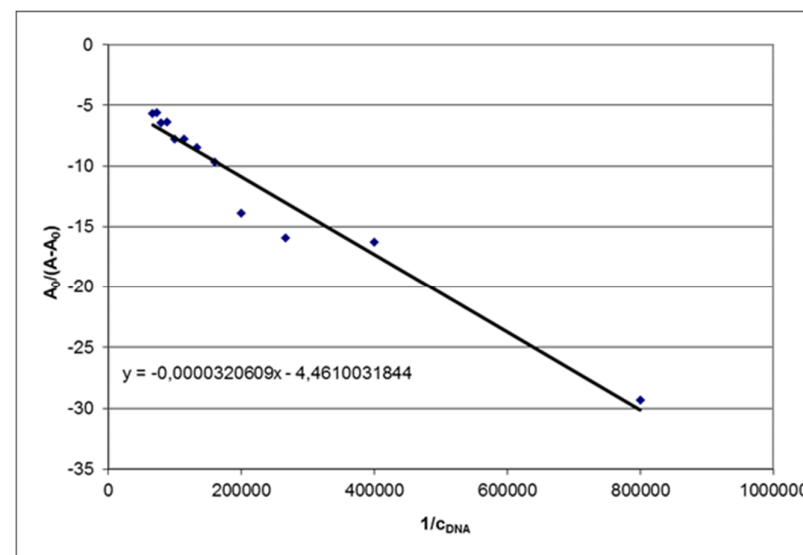

**Figure S191.** UV-vis absorption spectra of compound **16** (20  $\mu\text{M}$ ) in the presence of increasing amount of ct-DNA (0-15  $\mu\text{M}$ ) (left). The plot of  $A_0/A-A_0$  versus  $1/[\text{DNA}]$  yielded the binding constant (right).

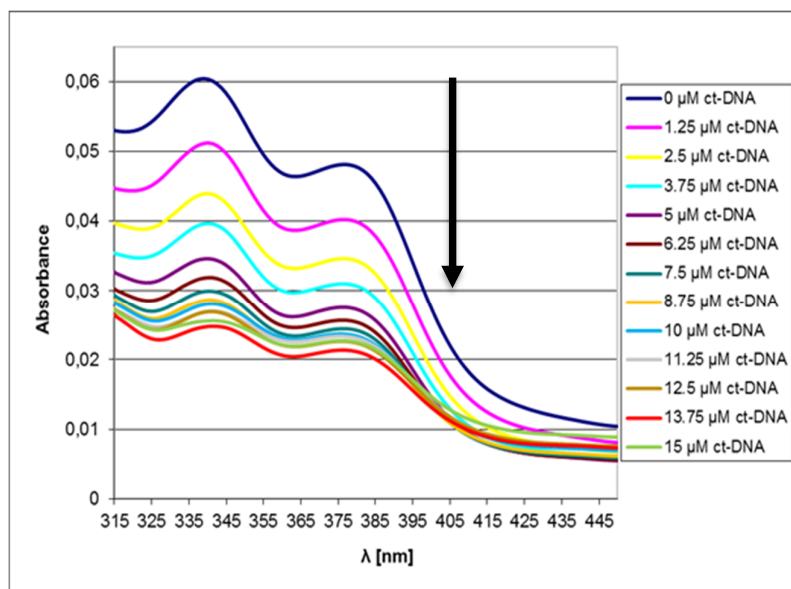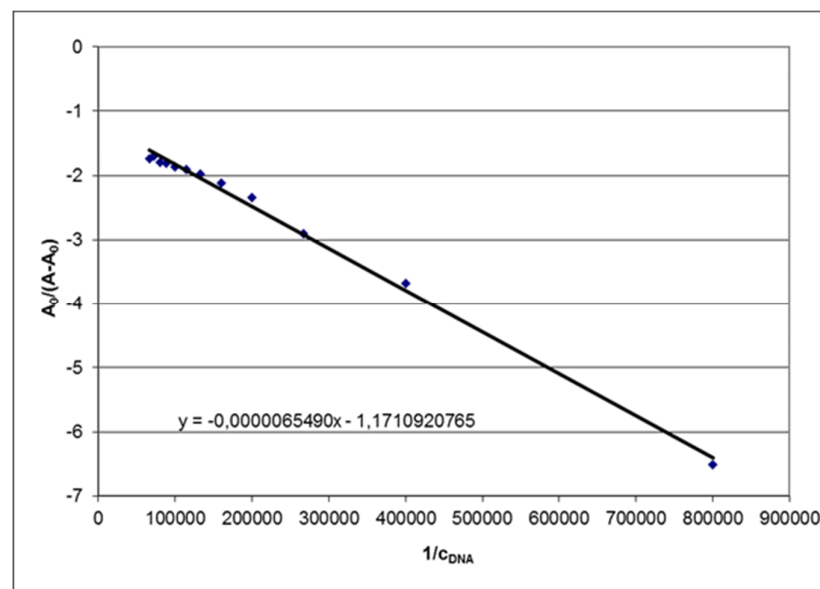

**Figure S192.** UV-vis absorption spectra of compound 17 (20 μM) in the presence of increasing amount of ct-DNA (0-15 μM) (left). The plot of  $A_0/A-A_0$  versus  $1/[DNA]$  yielded the binding constant (right).

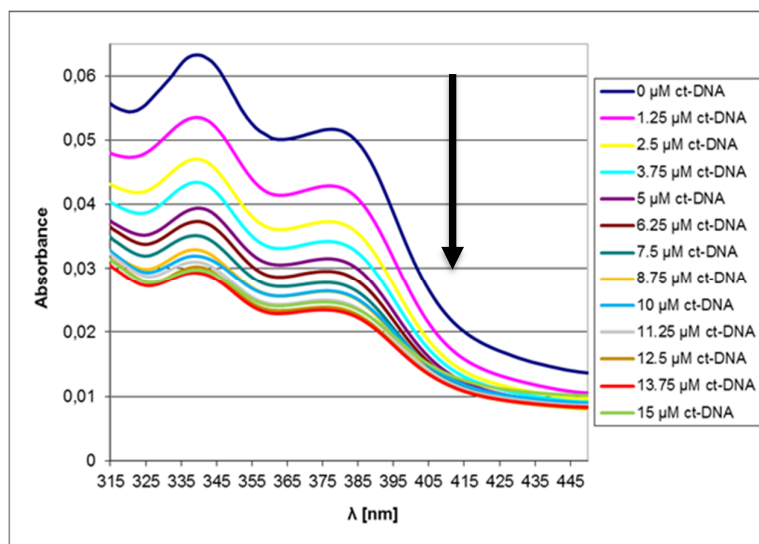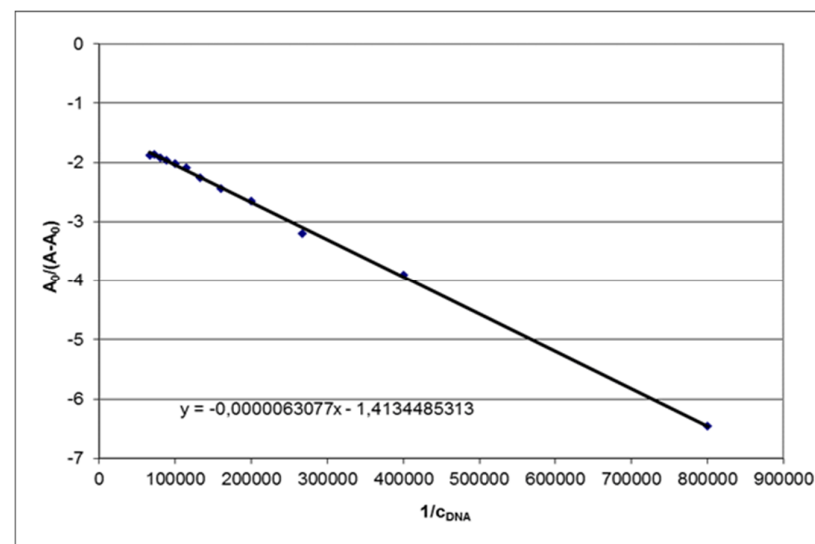

**Figure S193.** UV-vis absorption spectra of compound 18 (20 μM) in the presence of increasing amount of ct-DNA (0-15 μM) (left). The plot of  $A_0/A-A_0$  versus  $1/[DNA]$  yielded the binding constant (right).



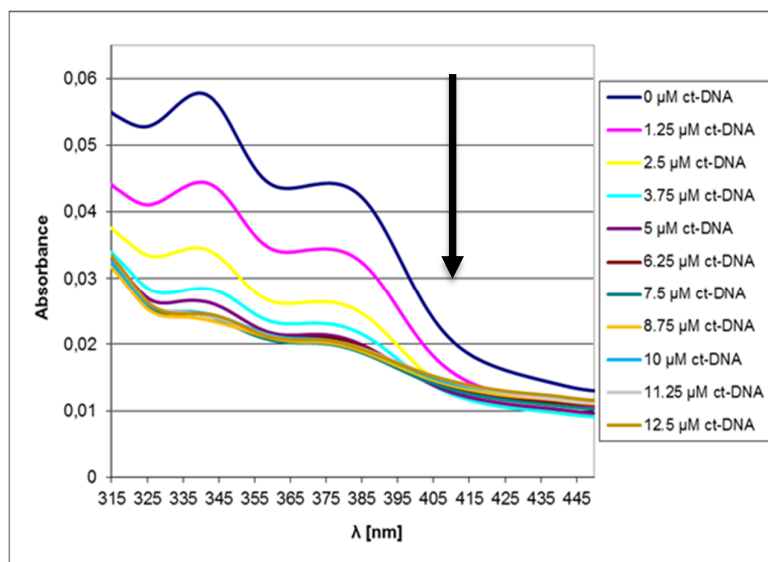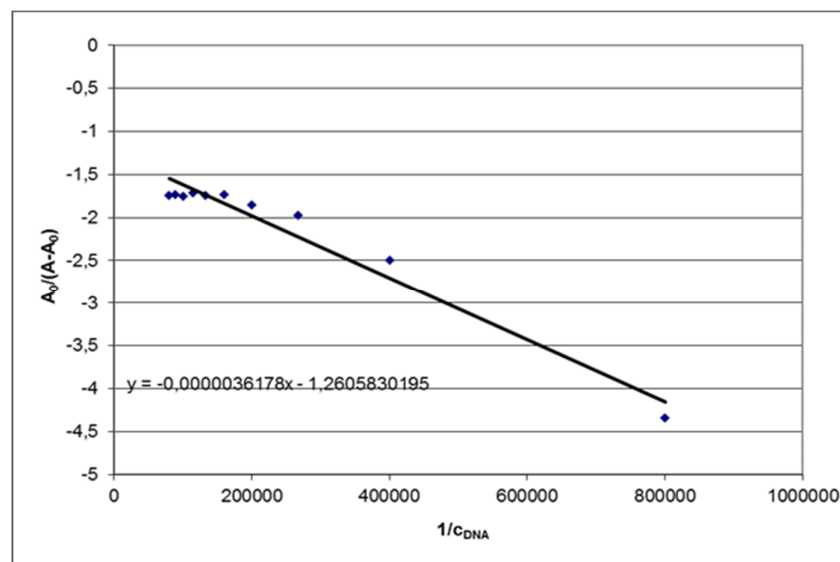

**Figure S194.** UV-vis absorption spectra of compound **19** (20  $\mu\text{M}$ ) in the presence of increasing amount of ct-DNA (0-15  $\mu\text{M}$ ) (left). The plot of  $A_0/A-A_0$  versus  $1/[\text{DNA}]$  yielded the binding constant (right).

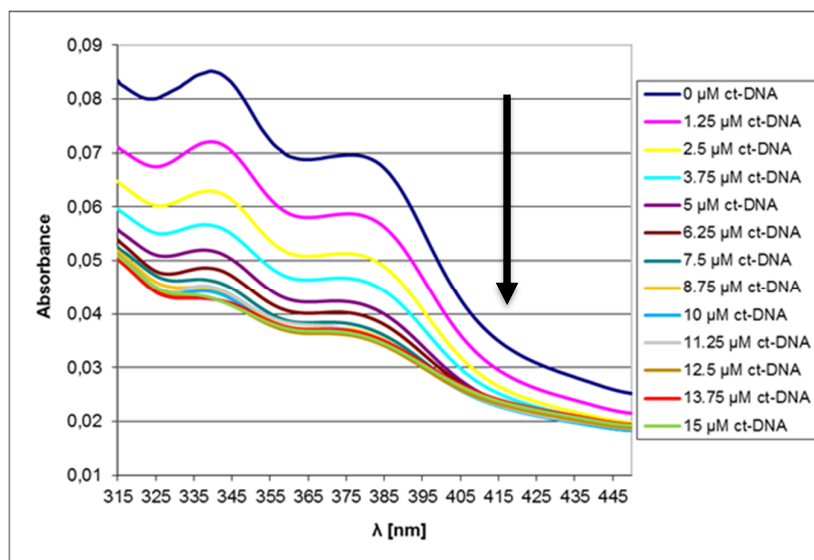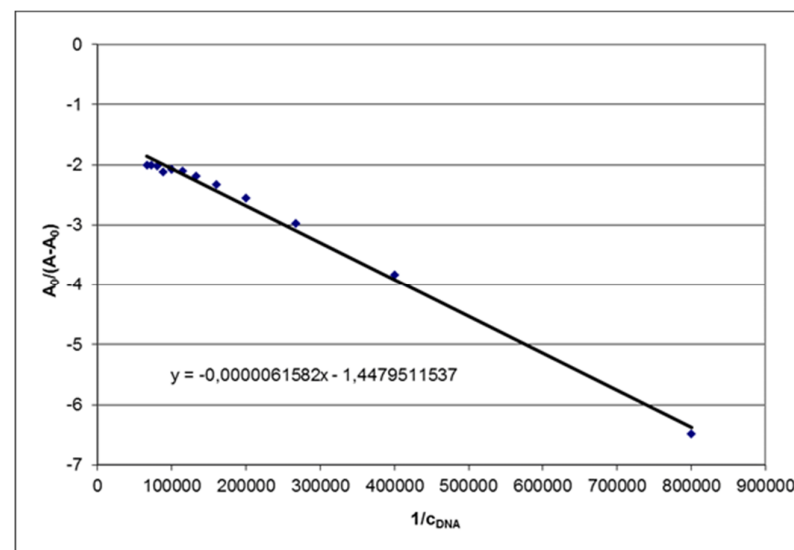

**Figure S195.** UV-vis absorption spectra of compound **20** (20  $\mu\text{M}$ ) in the presence of increasing amount of ct-DNA (0-15  $\mu\text{M}$ ) (left). The plot of  $A_0/A-A_0$  versus  $1/[\text{DNA}]$  yielded the binding constant (right).

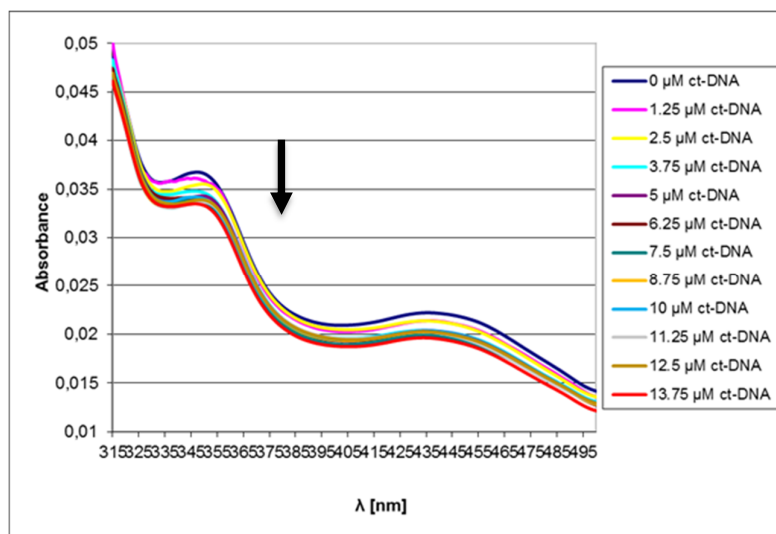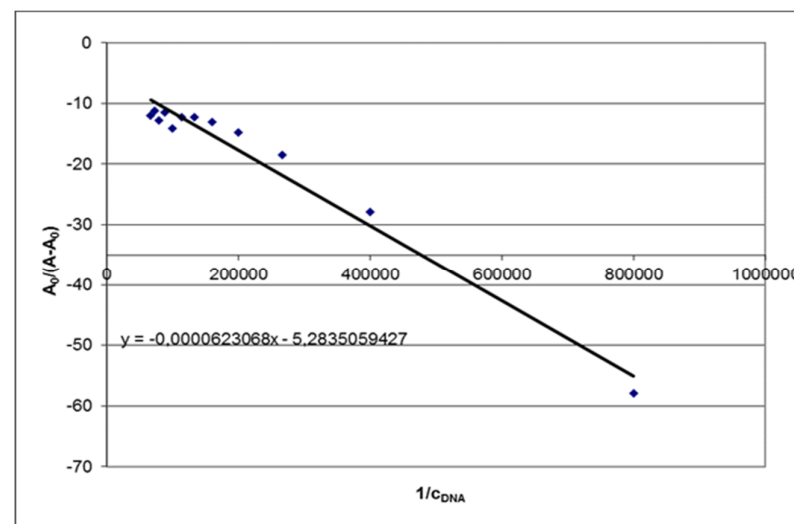

**Figure S196.** UV-vis absorption spectra of compound **33** (20  $\mu\text{M}$ ) in the presence of increasing amount of ct-DNA (0-15  $\mu\text{M}$ ) (left). The plot of  $A_0/(A-A_0)$  versus  $1/[\text{DNA}]$  yielded the binding constant (right).

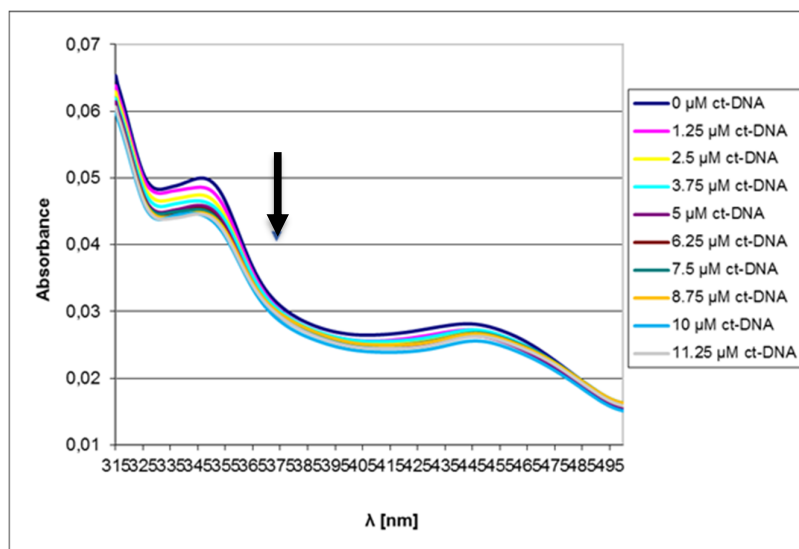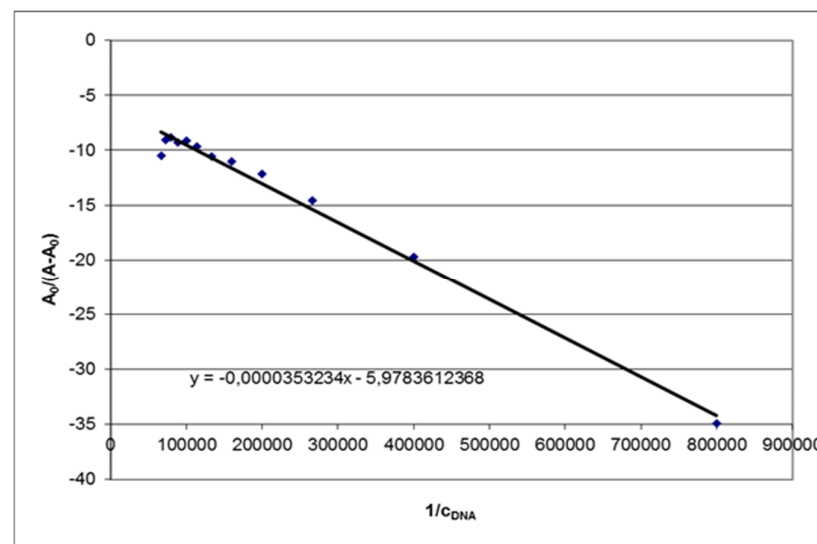

**Figure S197.** UV-vis absorption spectra of compound **34** (20  $\mu\text{M}$ ) in the presence of increasing amount of ct-DNA (0-15  $\mu\text{M}$ ) (left). The plot of  $A_0/A-A_0$  versus  $1/[\text{DNA}]$  yielded the binding constant (right).

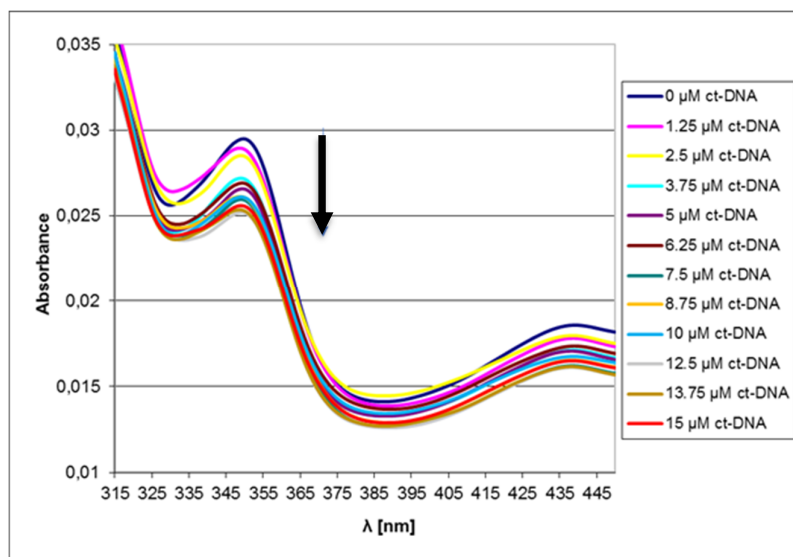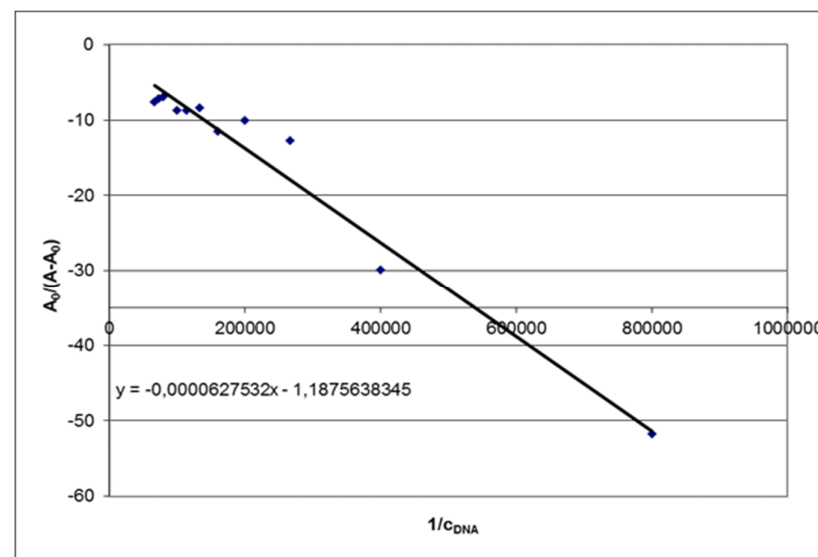

**Figure S198.** UV-vis absorption spectra of compound 35 (20 μM) in the presence of increasing amount of ct-DNA (0-15 μM) (left). The plot of  $A_0/A-A_0$  versus  $1/[DNA]$  yielded the binding constant (right).

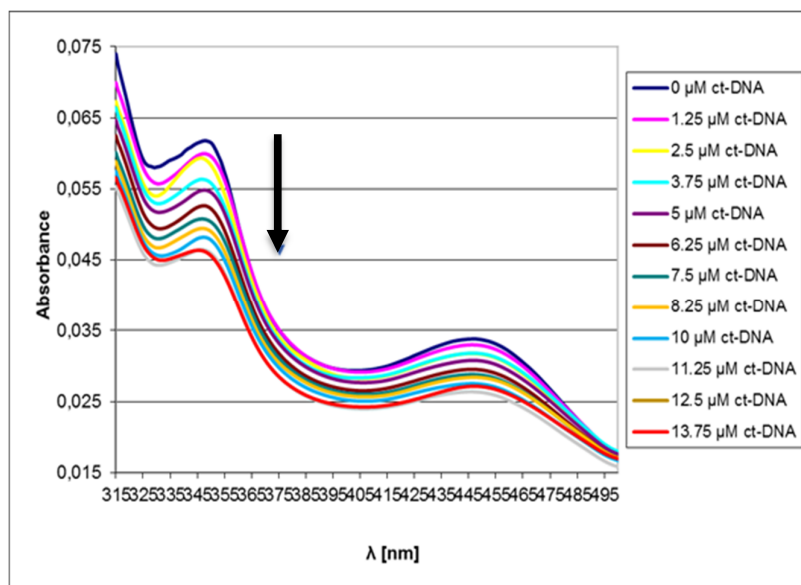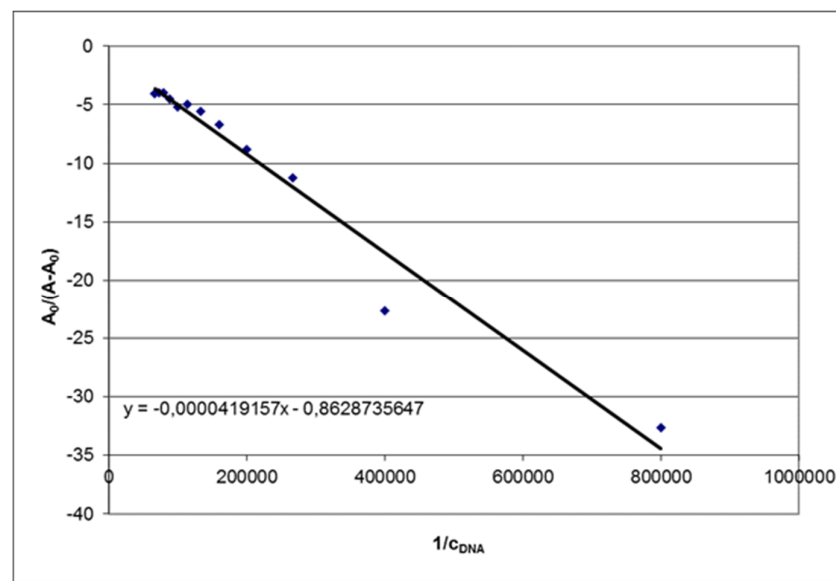

**Figure S199.** UV-vis absorption spectra of compound 36 (20  $\mu\text{M}$ ) in the presence of increasing amount of ct-DNA (0-15  $\mu\text{M}$ ) (left). The plot of  $A_0/A-A_0$  versus  $1/[\text{DNA}]$  yielded the binding constant (right).

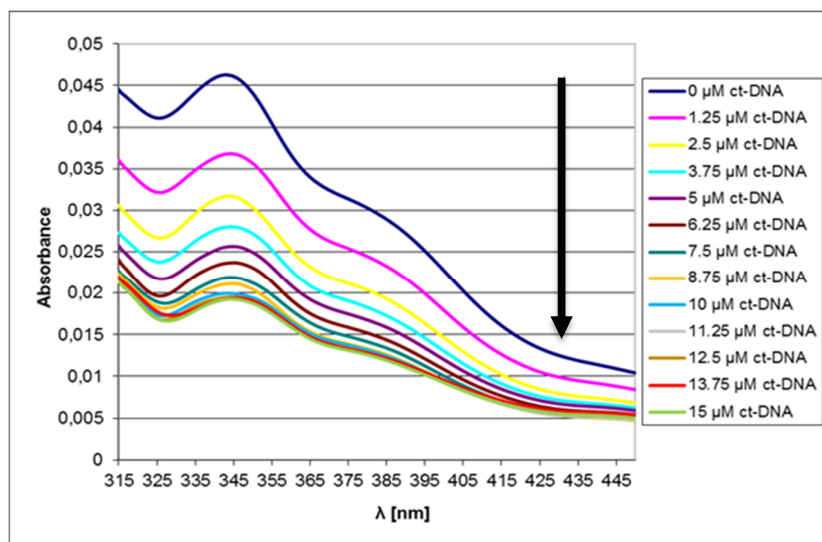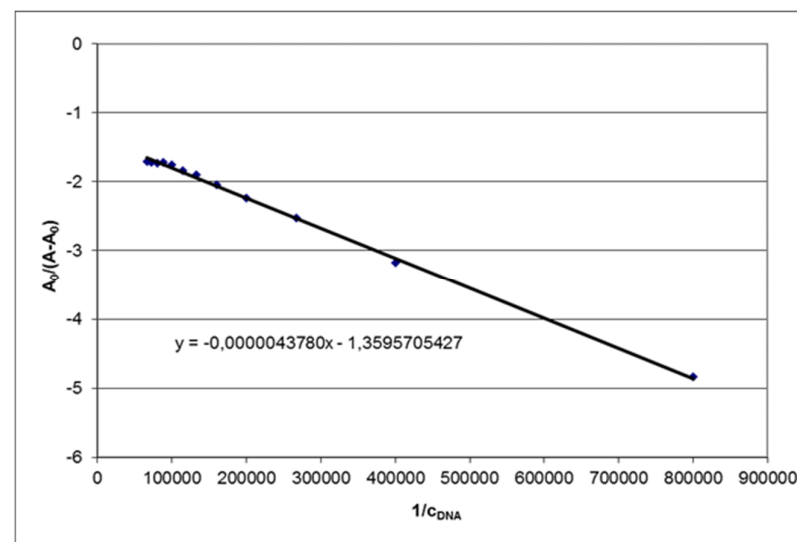

**Figure S200.** UV-vis absorption spectra of compound **39** (20  $\mu\text{M}$ ) in the presence of increasing amount of ct-DNA (0-15  $\mu\text{M}$ ) (left). The plot of  $A_0/(A-A_0)$  versus  $1/[\text{DNA}]$  yielded the binding constant (right).

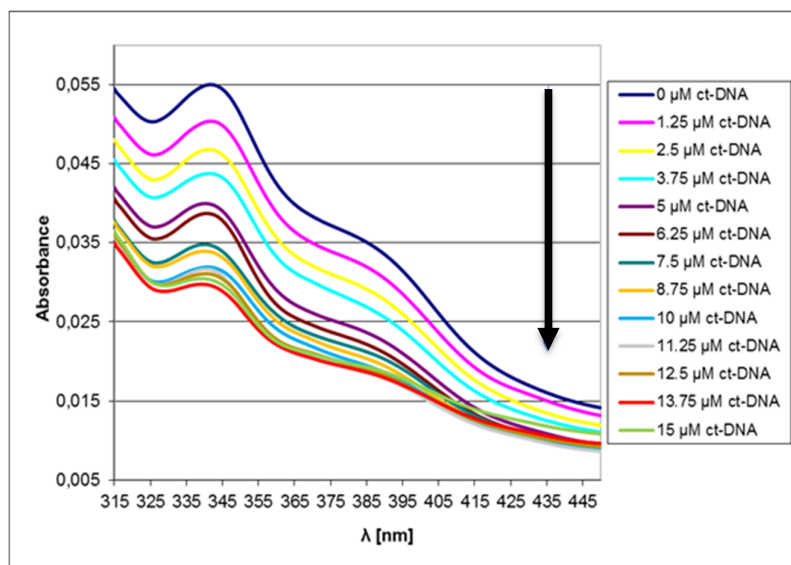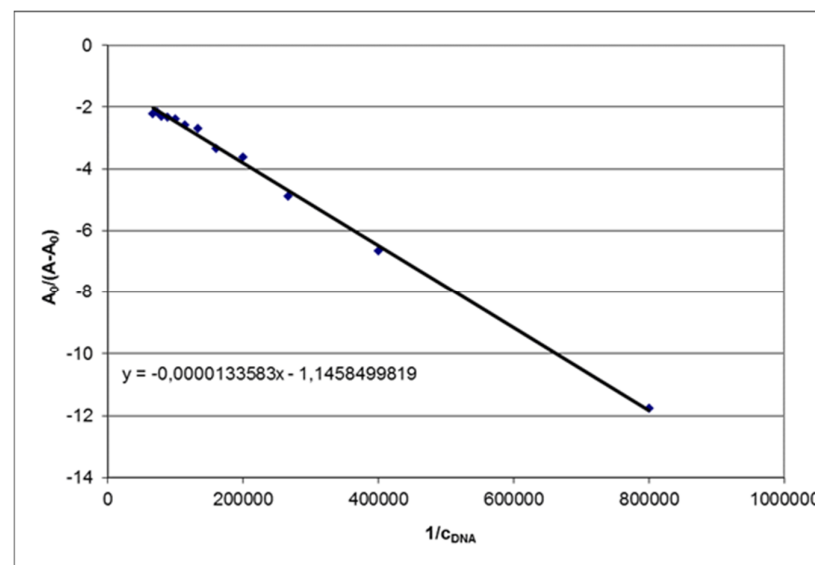

**Figure S201.** UV-vis absorption spectra of compound **40** (20 μM) in the presence of increasing amount of ct-DNA (0-15 μM) (left). The plot of  $A_0/(A-A_0)$  versus  $1/[DNA]$  yielded the binding constant (right).



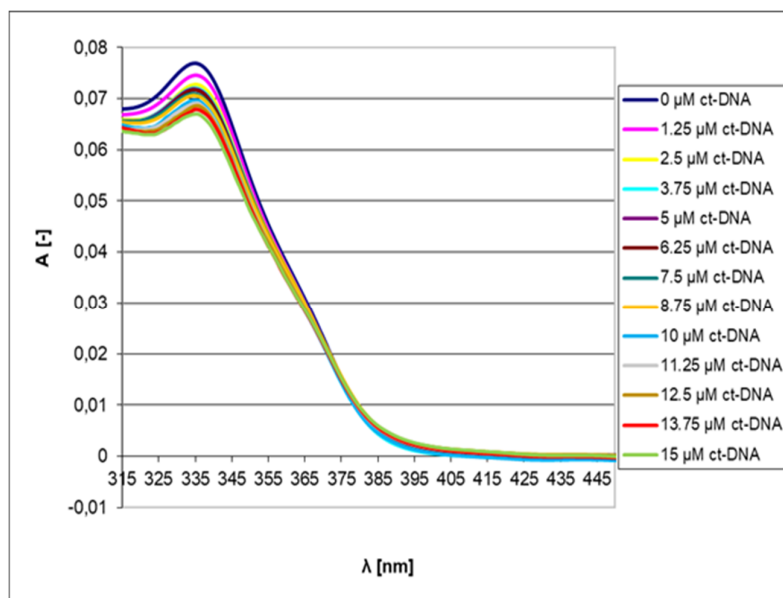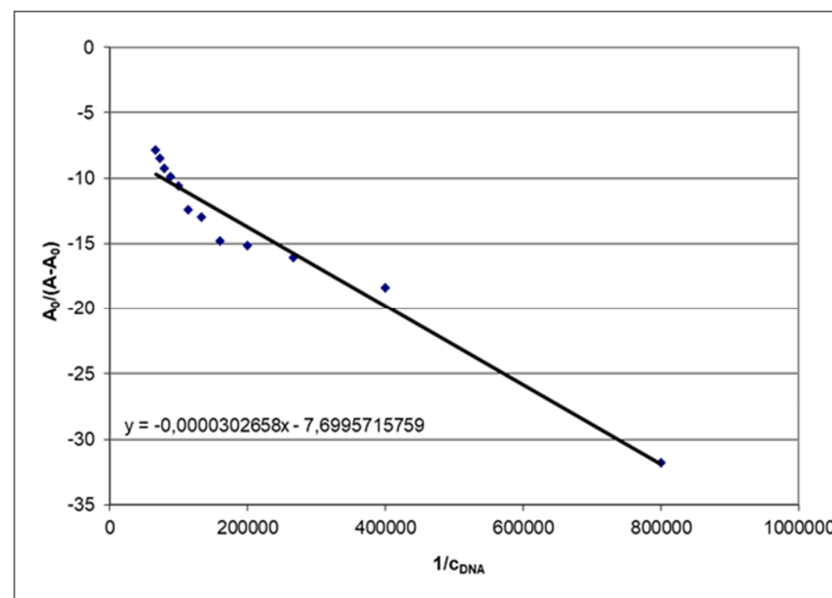

**Figure S202.** UV-vis absorption spectra of mitonafide (20 μM) in the presence of increasing amount of ct-DNA (0-15 μM) (left). The plot of  $A_0/(A-A_0)$  versus  $1/[DNA]$  yielded the binding constant (right).

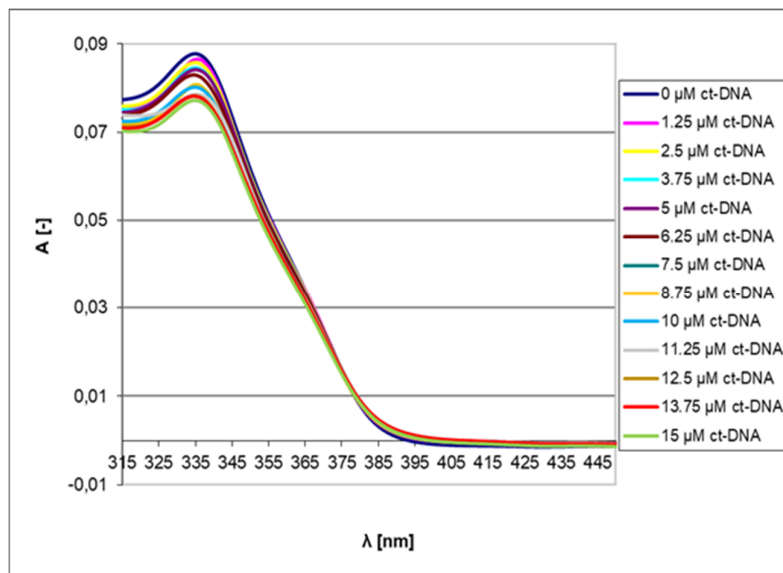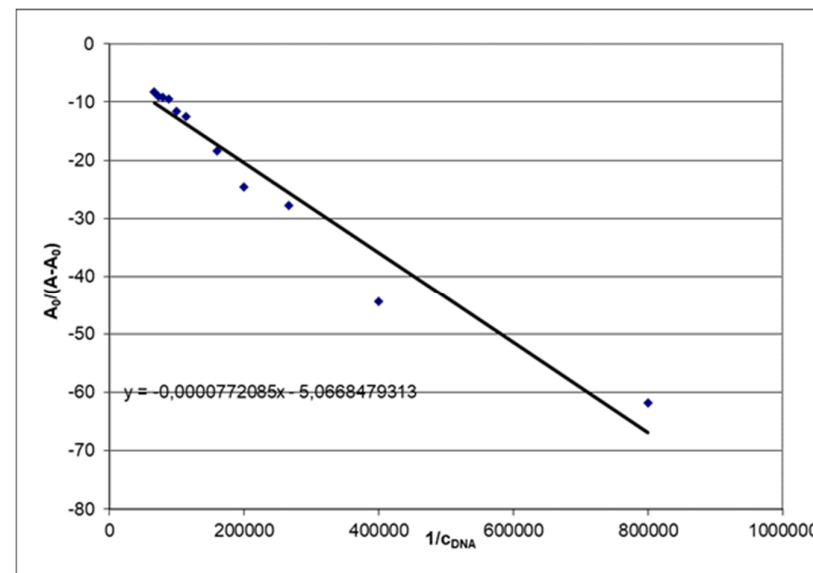

**Figure S203.** UV-vis absorption spectra of pinafide (20 μM) in the presence of increasing amount of ct-DNA (0-15 μM) (left). The plot of  $A_0/(A-A_0)$  versus  $1/[DNA]$  yielded the binding constant (right).

**Table 2S.** Crystallographic data.

| Compound                             | 39            | 41            |
|--------------------------------------|---------------|---------------|
| Wavelength [Å]                       | 0.7749        | 1.54178       |
| Temperature [K]                      | 100           | 130           |
| Space group                          | P-1           | P-1           |
| Z                                    | 2             | 2             |
| <i>a</i> [Å]                         | 6.923(2)      | 7.0385(8)     |
| <i>b</i> [Å]                         | 13.239(8)     | 9.5223(8)     |
| <i>c</i> [Å]                         | 15.571(3)     | 21.4413(17)   |
| $\alpha$ [°]                         | 105.721(0)    | 79.497(7)     |
| $\beta$ [°]                          | 102.188(3)    | 81.569(8)     |
| $\gamma$ [°]                         | 95.815(0)     | 87.093(8)     |
| R <sub>int</sub>                     | 0.0550        | 0.0892        |
| Resolution [Å]                       | 0.79          | 0.79          |
| % completeness                       | 74.3          | 94.8          |
| Independent reflections              | 4262          | 5628          |
| R/R(for F <sub>o</sub> >4 $\sigma$ ) | 0.0840/0.1106 | 0.1012/0.1755 |
| CSD code                             | 2059432       | 2059431       |
